# Supplementary material
Source: publisher figshare collection journal article supplement (https://gsajournals.figshare.com/ndownloader/files/18900914)
Supplement: Supplementary file 1 [file 18900914]

## Sheet: ED3040_Rep1
Table S13. Raw rDNA FISH data
DatasetName	ImageIndex	TotalCellCount	CellIndex	GlobalCellIndex	NuclearSize	AvgNuclearIntensity	std_NuclearIntensity	Cy5_NumSpotsPerCell	Cy5_SpotIndex	Cy5_SpotSize	Cy5_MeanSpotIntensity	Cy5_std_SpotIntensity	Cy5_MaxSpotIntensity	Cy5_SpotRRD	Cy5_Spot_centroidX	Cy5_Spot_centroidY
1	1	25	1	1	1105	346.469	120.3	2	1	34	1168	398.84	2138	0.6111	53	414
1	1	25	1	1	1105	346.469	120.3	2	2	37	1185	476.03	2368	0.6667	59	405
1	1	25	2	2	1323	347.628	112.6	2	1	35	1017	350.21	1795	0.5	101	1529
1	1	25	2	2	1323	347.628	112.6	2	2	31	858	228.3	1379	0.7	109	1544
1	1	25	3	3	2413	319.376	83.6	3	1	29	742	113.95	963	0.2381	405	1183
1	1	25	3	3	2413	319.376	83.6	3	2	10	673	52.8	748	0.4762	411	1190
1	1	25	3	3	2413	319.376	83.6	3	3	39	972	213.05	1474	0.6667	432	1214
1	1	25	4	4	1185	369.341	154.3	1	1	41	1708	794.35	3434	0.5	422	852
1	1	25	5	5	2224	421.696	198.9	2	1	41	1763	607.93	2886	0.36	627	1533
1	1	25	5	5	2224	421.696	198.9	2	2	40	1984	809.74	3973	0.64	637	1546
1	1	25	6	6	2779	357.863	100.4	2	1	38	1425	509.76	2497	0.1724	689	1409
1	1	25	6	6	2779	357.863	100.4	2	2	40	1652	505.03	2611	0.8276	699	1437
1	1	25	7	7	2549	357.203	102.8	2	1	44	1559	393.7	2337	0.2963	703	1756
1	1	25	7	7	2549	357.203	102.8	2	2	51	1351	243.56	1836	0.6296	705	1725
1	1	25	8	8	1232	363.384	140.7	1	1	39	1533	671.02	2935	0.4	739	359
1	1	25	9	9	1355	341.963	104.8	2	1	34	1394	610.47	2947	0.35	771	910
1	1	25	9	9	1355	341.963	104.8	2	2	35	1112	368.69	1846	0.35	783	919
1	1	25	10	10	1713	302.303	69.2	2	1	40	1416	492.26	2527	0.45	890	1138
1	1	25	10	10	1713	302.303	69.2	2	2	36	1308	469.15	2238	0.2	911	1126
1	1	25	11	11	1223	326.232	93	2	1	35	941	246.86	1525	0.4737	891	1962
1	1	25	11	11	1223	326.232	93	2	2	26	1052	258.97	1473	0.1579	912	1943
1	1	25	12	12	1332	351.307	122.3	2	1	38	1143	316.93	1853	0.2	1016	1694
1	1	25	12	12	1332	351.307	122.3	2	2	37	1380	486.04	2622	0.8	1018	1675
1	1	25	13	13	1444	340.575	103.3	2	1	39	1352	545.24	2567	0.6667	1011	1049
1	1	25	13	13	1444	340.575	103.3	2	2	37	1183	455.84	2253	0.2857	1031	1064
1	1	25	14	14	1301	329.956	91.9	1	1	45	1543	417.68	2330	0.7368	1127	1565
1	1	25	15	15	1174	345.167	118.8	2	1	38	753	100.27	962	0.3529	1176	262
1	1	25	15	15	1174	345.167	118.8	2	2	34	986	231.33	1428	0.7059	1191	255
1	1	25	16	16	1687	351.857	113.3	2	1	38	1223	500.73	2364	0.3636	1218	1104
1	1	25	16	16	1687	351.857	113.3	2	2	36	1365	549.66	2671	0.3182	1228	1132
1	1	25	17	17	2380	387.532	144.8	2	1	37	1296	444.43	2367	0.32	1219	1693
1	1	25	17	17	2380	387.532	144.8	2	2	42	1650	626.23	2967	0.56	1244	1678
1	1	25	18	18	1448	350.408	111.6	2	1	38	1459	597.77	2791	0.7	1230	1295
1	1	25	18	18	1448	350.408	111.6	2	2	35	1193	410.57	2027	0.45	1247	1284
1	1	25	19	19	1433	348.569	115.6	2	1	38	1079	319.89	1702	0.25	1390	1089
1	1	25	19	19	1433	348.569	115.6	2	2	41	1399	458.35	2374	0.35	1411	1073
1	1	25	20	20	1492	337.087	93.3	2	1	37	1262	486.37	2291	0.25	1487	847
1	1	25	20	20	1492	337.087	93.3	2	2	36	1221	427.21	2134	0.45	1504	863
1	1	25	21	21	1363	390.144	184.6	2	1	37	1284	460.44	2297	0.6842	1588	1616
1	1	25	21	21	1363	390.144	184.6	2	2	33	1223	425.94	2237	0.7368	1598	1625
1	1	25	22	22	1356	331.473	91	1	1	40	1587	606.82	2810	0.3158	1601	282
1	1	25	23	23	1440	355.356	125.5	2	1	36	1218	381.28	1923	0.4	1702	1423
1	1	25	23	23	1440	355.356	125.5	2	2	37	1225	372.96	2020	0.8	1715	1414
1	1	25	24	24	2637	341.804	83.3	2	1	41	1461	470.44	2502	0.1429	1781	874
1	1	25	24	24	2637	341.804	83.3	2	2	44	1367	329.5	2033	0.7857	1793	888
1	1	25	25	25	2173	436.889	228.7	2	1	40	2387	985.34	4095	0.7083	1898	615
1	1	25	25	25	2173	436.889	228.7	2	2	43	2224	630.32	3488	0.9583	1900	626
2	2	35	1	26	1276	446.318	238.6	2	1	35	994	335.4	1800	0.3889	130	1486
2	2	35	1	26	1276	446.318	238.6	2	2	33	949	321.3	1717	0.6667	133	1504
2	2	35	2	27	1045	392.349	150.8	2	1	34	929	281.76	1585	0.6111	144	542
2	2	35	2	27	1045	392.349	150.8	2	2	35	1095	412.57	2052	0.5556	150	530
2	2	35	3	28	1868	432.441	180.4	2	1	42	1017	235.87	1515	0.6364	158	1101
2	2	35	3	28	1868	432.441	180.4	2	2	48	1095	234.83	1531	0.5909	175	1103
2	2	35	4	29	1199	354.731	87.2	2	1	10	668	80.77	789	0.5294	205	572
2	2	35	4	29	1199	354.731	87.2	2	2	60	1167	264.63	1781	0.9412	217	574
2	2	35	5	30	1581	400.634	136	2	1	26	763	174.68	1198	0.3333	221	375
2	2	35	5	30	1581	400.634	136	2	2	36	1079	397.1	2016	0.1905	239	374
2	2	35	6	31	1096	366.539	105.8	2	1	37	1059	288.24	1647	0.6111	252	1579
2	2	35	6	31	1096	366.539	105.8	2	2	29	786	115.07	1013	0.3889	256	1593
2	2	35	7	32	1295	346.965	84.3	1	1	36	1056	345.66	1852	0.5789	275	1284
2	2	35	8	33	1140	335.074	67.7	2	1	39	1027	254.38	1504	0.9333	455	734
2	2	35	8	33	1140	335.074	67.7	2	2	32	933	250.39	1473	0.1333	456	753
2	2	35	9	34	1265	393.069	153.5	1	1	42	2046	700.69	3503	0.6471	477	1597
2	2	35	10	35	1303	343.229	74.3	2	1	35	995	269.75	1512	0.7368	496	532
2	2	35	10	35	1303	343.229	74.3	2	2	30	1044	335.56	1670	0.1579	499	554
2	2	35	11	36	1209	358.474	90.1	2	1	38	1266	457	2250	0.4444	559	360
2	2	35	11	36	1209	358.474	90.1	2	2	40	912	234.18	1391	0.3333	583	353
2	2	35	12	37	1328	359.686	93.3	2	1	38	1328	527.53	2549	0.7895	581	1009
2	2	35	12	37	1328	359.686	93.3	2	2	38	1107	348.36	1803	0.4211	592	994
2	2	35	13	38	1851	407.065	153.9	2	1	36	1323	451.61	2374	0.2381	767	1753
2	2	35	13	38	1851	407.065	153.9	2	2	39	1587	601.67	2912	0.7619	772	1740
2	2	35	14	39	1186	364.397	99.4	2	1	36	1098	357.21	1876	0.2778	865	116
2	2	35	14	39	1186	364.397	99.4	2	2	35	951	267.2	1638	0.3333	875	126
2	2	35	15	40	1239	379.52	127.6	2	1	43	1015	345.3	1981	0.6667	946	281
2	2	35	15	40	1239	379.52	127.6	2	2	31	918	301.67	1598	0.5	961	282
2	2	35	16	41	2091	469.554	232.3	2	1	40	1600	493.73	2534	0.6957	1105	1821
2	2	35	16	41	2091	469.554	232.3	2	2	40	2234	847.86	4095	0.913	1117	1819
2	2	35	17	42	1839	412.015	149	2	1	37	1070	268.4	1571	0.4091	1149	505
2	2	35	17	42	1839	412.015	149	2	2	39	1288	481.69	2369	0.5909	1157	477
2	2	35	18	43	1905	432.759	173.3	2	1	36	1079	394.73	2121	0.375	1208	255
2	2	35	18	43	1905	432.759	173.3	2	2	32	928	294.21	1619	0.6667	1214	276
2	2	35	19	44	1302	382.29	124.6	2	1	37	1576	609.7	2941	0.4737	1212	1991
2	2	35	19	44	1302	382.29	124.6	2	2	37	1127	311.07	1849	0.3158	1237	1981
2	2	35	20	45	2392	467.188	225.1	3	1	39	1452	526.5	2627	0.9565	1231	1465
2	2	35	20	45	2392	467.188	225.1	3	2	31	1014	292.49	1642	0.8696	1235	1478
2	2	35	20	45	2392	467.188	225.1	3	3	30	999	235.77	1494	0.4783	1239	1489
2	2	35	21	46	1426	382.921	126.1	1	1	60	1211	325.96	1969	0.4737	1319	1544
2	2	35	22	47	1709	449.041	214.1	2	1	38	1751	832.94	3721	0.8095	1481	979
2	2	35	22	47	1709	449.041	214.1	2	2	37	1331	414.81	2192	0.8571	1488	967
2	2	35	23	48	1364	380.998	126.3	2	1	36	1218	434.42	2178	0.8333	1522	1111
2	2	35	23	48	1364	380.998	126.3	2	2	38	1248	451.2	2271	0.2222	1535	1113
2	2	35	24	49	1082	376.141	130.4	2	1	37	1134	401.47	1957	0.5294	1529	28
2	2	35	24	49	1082	376.141	130.4	2	2	37	1191	453.62	2194	0.5294	1531	48
2	2	35	25	50	2344	429.844	162.3	2	1	34	1454	482.36	2462	1	1681	1521
2	2	35	25	50	2344	429.844	162.3	2	2	32	1428	487.95	2581	0.76	1688	1517
2	2	35	26	51	1407	327.134	68.1	2	1	40	1092	350.61	1745	0.7222	1678	408
2	2	35	26	51	1407	327.134	68.1	2	2	33	892	179.45	1183	0.3333	1699	405
2	2	35	27	52	1257	372.159	107.8	2	1	26	701	116.69	971	0.3158	1697	697
2	2	35	27	52	1257	372.159	107.8	2	2	26	754	125.37	1094	0.1579	1702	676
2	2	35	28	53	1294	410.641	173.7	2	1	36	1386	521.45	2423	0.6111	1741	1446
2	2	35	28	53	1294	410.641	173.7	2	2	41	1642	622.21	3171	0.8889	1756	1444
2	2	35	29	54	2608	401.923	118.6	2	1	53	1967	656.22	3299	0.1481	1778	1331
2	2	35	29	54	2608	401.923	118.6	2	2	49	1445	332.3	2035	0.2593	1812	1358
2	2	35	30	55	1244	421.611	189.7	2	1	35	1220	437.14	2240	0.4211	1884	668
2	2	35	30	55	1244	421.611	189.7	2	2	36	1122	382.62	1971	0.4737	1885	658
2	2	35	31	56	2049	415.076	151.2	2	1	40	1001	177.09	1339	0.5833	1901	392
2	2	35	31	56	2049	415.076	151.2	2	2	43	1271	283.93	1856	0.625	1925	395
2	2	35	32	57	1415	335.526	63.9	2	1	32	784	140.49	1066	0.4118	1921	1075
2	2	35	32	57	1415	335.526	63.9	2	2	34	910	159.79	1232	0.1765	1922	1049
2	2	35	33	58	1264	400.695	163.6	1	1	48	1900	641.35	3058	0.6667	1944	692
2	2	35	34	59	1254	364.124	97.6	3	1	20	685	133.93	988	0.2941	1990	422
2	2	35	34	59	1254	364.124	97.6	3	2	36	1091	283.94	1650	0.7647	2007	421
2	2	35	34	59	1254	364.124	97.6	3	3	36	1083	287.37	1860	0.7059	2018	421
2	2	35	35	60	1195	387.051	138.8	1	1	63	1255	346.64	2080	0.4444	2031	681
3	3	31	1	61	1065	356.396	80.1	2	1	29	804	159.38	1097	0.25	61	826
3	3	31	1	61	1065	356.396	80.1	2	2	31	827	190.24	1281	0.5	63	811
3	3	31	2	62	1280	407.141	150.5	2	1	38	1233	459.45	2387	0.4737	108	1327
3	3	31	2	62	1280	407.141	150.5	2	2	37	1155	386.15	1948	0.6842	109	1344
3	3	31	3	63	1081	400.995	156.8	2	1	34	1026	253.17	1576	0.625	126	1169
3	3	31	3	63	1081	400.995	156.8	2	2	38	1341	347.79	2117	0.6875	136	1158
3	3	31	4	64	1964	465.577	221.3	2	1	37	1253	325.7	1930	0.6522	163	1123
3	3	31	4	64	1964	465.577	221.3	2	2	38	1310	422.47	2171	0.7391	179	1116
3	3	31	5	65	1082	366.807	107.9	2	1	39	1194	395.1	2054	0.4706	169	1428
3	3	31	5	65	1082	366.807	107.9	2	2	16	810	199.96	1151	0.1176	195	1422
3	3	31	6	66	1135	401.451	151.7	2	1	42	1274	400.33	2098	0.4706	186	1620
3	3	31	6	66	1135	401.451	151.7	2	2	38	1186	392.37	2066	0.3529	196	1593
3	3	31	7	67	1637	394.381	127	2	1	32	1102	303.88	1634	0.3158	211	1918
3	3	31	7	67	1637	394.381	127	2	2	31	1046	255.79	1611	0.7895	213	1909
3	3	31	8	68	1414	404.605	142.6	4	1	22	687	136.91	917	0.3333	230	32
3	3	31	8	68	1414	404.605	142.6	4	2	22	700	93.99	858	0.6111	241	40
3	3	31	8	68	1414	404.605	142.6	4	3	26	733	130.72	966	0.8333	251	31
3	3	31	8	68	1414	404.605	142.6	4	4	14	665	96.24	823	0.3333	252	41
3	3	31	9	69	2358	440.933	170.2	4	1	32	1083	281.78	1651	0.3333	237	873
3	3	31	9	69	2358	440.933	170.2	4	2	30	1068	195.96	1474	0.6667	246	874
3	3	31	9	69	2358	440.933	170.2	4	3	41	1150	312.73	1789	0.625	257	860
3	3	31	9	69	2358	440.933	170.2	4	4	31	1082	219.18	1502	0.75	262	869
3	3	31	10	70	1909	468.803	221.8	2	1	44	1846	645.29	3322	0.5455	331	435
3	3	31	10	70	1909	468.803	221.8	2	2	38	1399	429.42	2325	0.6818	341	411
3	3	31	11	71	922	425.267	206.3	2	1	34	1215	494.22	2373	0.625	426	101
3	3	31	11	71	922	425.267	206.3	2	2	37	1111	355.72	1807	0.75	439	100
3	3	31	12	72	1999	438.623	183	2	1	44	1768	633.25	3027	0.6364	475	806
3	3	31	12	72	1999	438.623	183	2	2	37	1155	408.62	2009	0.3182	480	785
3	3	31	13	73	1231	405.106	155.8	2	1	28	784	175.79	1149	0.4706	475	256
3	3	31	13	73	1231	405.106	155.8	2	2	37	889	254.78	1445	0.8235	489	257
3	3	31	14	74	1232	385.903	124.6	1	1	44	2049	898.62	4095	0.4444	564	291
3	3	31	15	75	2456	412.657	133	2	1	48	2488	922.27	4095	0.8333	580	538
3	3	31	15	75	2456	412.657	133	2	2	44	1584	419.28	2425	0.4583	589	526
3	3	31	16	76	2322	446.739	179.6	2	1	44	1902	768.03	3396	0.5	600	781
3	3	31	16	76	2322	446.739	179.6	2	2	44	1554	540.64	2715	0.3077	612	796
3	3	31	17	77	2142	446.726	184.6	1	1	60	1736	383.32	2418	0.5417	707	1903
3	3	31	18	78	2212	488.932	265.9	2	1	39	1823	750.18	3693	0.75	815	1207
3	3	31	18	78	2212	488.932	265.9	2	2	40	1431	469.57	2344	0.6667	831	1204
3	3	31	19	79	1388	388.352	123.5	2	1	38	1586	650.8	2991	0.45	833	1301
3	3	31	19	79	1388	388.352	123.5	2	2	37	1386	509.56	2443	0.35	857	1299
3	3	31	20	80	1211	382.963	121.7	1	1	59	1088	255.92	1613	0.6875	856	120
3	3	31	21	81	1287	421.899	184.9	1	1	39	1355	464.72	2268	0.8889	977	463
3	3	31	22	82	1350	388.36	126.9	1	1	44	1457	443.68	2351	0.5789	1078	917
3	3	31	23	83	1363	410.003	160.6	2	1	38	1376	578.12	2819	0.3333	1280	758
3	3	31	23	83	1363	410.003	160.6	2	2	39	1639	698.81	3273	0.7222	1305	763
3	3	31	24	84	1195	426.757	190.9	2	1	26	818	184.64	1229	0.6667	1382	1102
3	3	31	24	84	1195	426.757	190.9	2	2	29	851	206.83	1296	0.5	1390	1099
3	3	31	25	85	1365	411.215	161.1	2	1	40	1515	580.15	2857	0.6471	1480	1772
3	3	31	25	85	1365	411.215	161.1	2	2	40	2048	852.4	4016	0.8824	1493	1775
3	3	31	26	86	1271	384.485	120.7	2	1	23	996	199.74	1436	0.1765	1651	1813
3	3	31	26	86	1271	384.485	120.7	2	2	35	1068	309.27	1685	0.7059	1659	1823
3	3	31	27	87	1468	393.849	136.8	1	1	44	2447	843.07	4095	0.8824	1666	652
3	3	31	28	88	1267	441.39	222.8	2	1	28	899	261.74	1471	0.8333	1692	1113
3	3	31	28	88	1267	441.39	222.8	2	2	31	1094	298.93	1807	0.7778	1701	1116
3	3	31	29	89	1397	350.276	78.5	2	1	28	803	118.45	1046	0.4444	1783	1033
3	3	31	29	89	1397	350.276	78.5	2	2	30	768	91.38	951	0.8889	1793	1033
3	3	31	30	90	1276	368.603	98.6	2	1	32	731	77.29	897	0.6471	1927	1573
3	3	31	30	90	1276	368.603	98.6	2	2	10	790	70.07	913	0.0588	1932	1593
3	3	31	31	91	1193	431.641	198.9	2	1	36	1145	415.84	2076	0.4444	2003	1104
3	3	31	31	91	1193	431.641	198.9	2	2	37	1098	328.44	1842	0.7222	2018	1099
4	4	30	1	92	1386	410.185	193.6	2	1	26	1087	238.18	1572	0.4737	109	1349
4	4	30	1	92	1386	410.185	193.6	2	2	22	753	122.56	970	0.5789	132	1343
4	4	30	2	93	1292	340.439	75.4	2	1	27	1042	247.58	1497	0.2105	375	77
4	4	30	2	93	1292	340.439	75.4	2	2	31	1066	222.55	1465	0.4737	380	52
4	4	30	3	94	1696	393.288	149.5	1	1	50	1717	514.48	3263	0.5238	423	1920
4	4	30	4	95	1542	334.676	70.6	2	1	15	989	135.26	1268	0.1111	409	1356
4	4	30	4	95	1542	334.676	70.6	2	2	29	905	166.6	1258	0.7778	423	1359
4	4	30	5	96	1277	385.402	146.7	1	1	41	1088	219.46	1646	0.5882	470	97
4	4	30	6	97	1520	338.393	69.6	1	1	38	1682	441.04	2473	0.2	496	1987
4	4	30	7	98	1579	369.258	116.2	1	1	37	1353	275.77	1853	1	535	1139
4	4	30	8	99	1510	403.53	183.5	1	1	37	1748	674.55	3080	0.8947	565	1278
4	4	30	9	100	1492	310.062	50.3	0	NaN	NaN	NaN	NaN	NaN	NaN	NaN	NaN
4	4	30	10	101	1539	360.224	115	2	1	29	998	309.2	1664	0.2941	579	188
4	4	30	10	101	1539	360.224	115	2	2	21	796	162.83	1131	0.3529	591	199
4	4	30	11	102	1410	404.533	168.7	1	1	43	2182	798.65	4095	0.85	717	1185
4	4	30	12	103	1533	411.721	176.3	2	1	27	940	209.88	1322	0.8571	758	773
4	4	30	12	103	1533	411.721	176.3	2	2	25	1033	246.27	1483	0.4286	760	787
4	4	30	13	104	1587	386.429	141.9	2	1	34	891	162.92	1231	0.5	809	1509
4	4	30	13	104	1587	386.429	141.9	2	2	29	1032	202.42	1443	0.4	826	1524
4	4	30	14	105	1621	412.528	171.6	1	1	45	2045	695.34	3631	0.6667	862	920
4	4	30	15	106	1484	410.171	179.8	2	1	26	992	337.51	1728	0.4211	887	464
4	4	30	15	106	1484	410.171	179.8	2	2	22	940	266.8	1416	0.6316	902	456
4	4	30	16	107	1567	400.168	164.3	2	1	26	1133	249.8	1546	0.65	949	1414
4	4	30	16	107	1567	400.168	164.3	2	2	35	1514	657.28	3083	0.8	958	1424
4	4	30	17	108	1567	349.904	89.9	2	1	22	793	118.35	995	0.5789	953	172
4	4	30	17	108	1567	349.904	89.9	2	2	26	740	89.27	927	0.2105	956	192
4	4	30	18	109	1478	405.88	174.1	2	1	32	1247	300.25	1822	0.45	1040	1992
4	4	30	18	109	1478	405.88	174.1	2	2	31	1315	391.61	2074	0.6	1047	1979
4	4	30	19	110	2682	486.769	278.5	4	1	33	1284	329.5	1812	0.75	1136	638
4	4	30	19	110	2682	486.769	278.5	4	2	28	1228	411.08	2098	0.6071	1142	623
4	4	30	19	110	2682	486.769	278.5	4	3	32	1311	397.8	2136	0.5	1142	649
4	4	30	19	110	2682	486.769	278.5	4	4	32	1089	261.23	1524	0.5357	1159	635
4	4	30	20	111	1633	397.578	167.7	1	1	43	1569	399.08	2399	0.6364	1205	1712
4	4	30	21	112	1689	369.66	111.4	2	1	29	1208	355.36	2001	0.1905	1294	342
4	4	30	21	112	1689	369.66	111.4	2	2	25	1077	318.38	1684	0.9524	1297	322
4	4	30	22	113	1687	396.903	153.4	2	1	29	1296	388.42	2112	0.4286	1300	184
4	4	30	22	113	1687	396.903	153.4	2	2	25	1279	372.91	1927	0.6667	1302	193
4	4	30	23	114	1702	426.549	198.4	2	1	29	1154	236.66	1549	0.9048	1387	1650
4	4	30	23	114	1702	426.549	198.4	2	2	27	1224	266.29	1866	0.5238	1388	1661
4	4	30	24	115	1490	416.464	192.4	2	1	27	1102	288.22	1654	0.55	1499	486
4	4	30	24	115	1490	416.464	192.4	2	2	26	1052	232.01	1488	0.6	1513	485
4	4	30	25	116	1624	414.714	181.8	2	1	28	1310	327.97	2110	0.5	1590	1153
4	4	30	25	116	1624	414.714	181.8	2	2	29	1388	466.9	2368	0.6	1606	1140
4	4	30	26	117	1418	453.14	263.2	2	1	35	1758	730.26	3402	0.95	1649	1413
4	4	30	26	117	1418	453.14	263.2	2	2	29	1318	483.18	2375	0.5	1658	1406
4	4	30	27	118	1615	398.078	166.3	2	1	24	899	203.18	1293	0.7368	1708	477
4	4	30	27	118	1615	398.078	166.3	2	2	25	1122	332.97	1709	0.6842	1716	460
4	4	30	28	119	1570	373.27	124	2	1	23	950	168.36	1207	0.2105	1783	1952
4	4	30	28	119	1570	373.27	124	2	2	30	1032	140.47	1275	0.6842	1792	1950
4	4	30	29	120	2998	365.518	92.2	3	1	33	1433	431.87	2254	0.6897	1907	234
4	4	30	29	120	2998	365.518	92.2	3	2	28	1274	356.31	1978	0.1379	1925	228
4	4	30	29	120	2998	365.518	92.2	3	3	15	737	135.17	935	0.1034	1926	219
4	4	30	30	121	1213	334.692	75.7	2	1	18	754	83.07	897	0.4375	1963	1837
4	4	30	30	121	1213	334.692	75.7	2	2	9	660	32.62	698	0.3125	1963	1843
5	5	223	1	122	824	700.95	287.8	1	1	43	1945	674.01	3484	0.6875	50	664
5	5	223	2	123	637	691.352	332.1	2	1	28	1537	581.41	2640	0.5	62	1042
5	5	223	2	123	637	691.352	332.1	2	2	28	1446	474.69	2402	0.8571	71	1040
5	5	223	3	124	875	698.362	308.3	1	1	48	3168	883.19	4095	0.4667	75	226
5	5	223	4	125	973	682.703	253.2	2	1	35	2402	986.5	4095	0.5	87	957
5	5	223	4	125	973	682.703	253.2	2	2	29	2020	824.56	3584	0.4375	92	949
5	5	223	5	126	1900	753.512	319.1	4	1	34	1547	578.05	2840	0.5238	95	291
5	5	223	5	126	1900	753.512	319.1	4	2	41	2015	653.51	3569	0.9048	102	301
5	5	223	5	126	1900	753.512	319.1	4	3	36	2103	892.52	4095	0.2857	116	278
5	5	223	5	126	1900	753.512	319.1	4	4	25	1258	361.79	2015	0.4286	115	314
5	5	223	6	127	651	694.985	329.1	2	1	34	1856	702.39	3526	0.5	101	1125
5	5	223	6	127	651	694.985	329.1	2	2	37	1797	644.56	3299	0.6429	103	1114
5	5	223	7	128	679	616.702	156.6	1	1	31	1614	586.48	2927	0.4286	97	619
5	5	223	8	129	618	665.969	296.4	2	1	35	1697	649.02	3159	0.9167	105	1181
5	5	223	8	129	618	665.969	296.4	2	2	30	1509	435.4	2375	0.6667	115	1177
5	5	223	9	130	844	678.096	253.8	2	1	34	1749	690.03	3260	0.4	101	180
5	5	223	9	130	844	678.096	253.8	2	2	35	1887	713.94	3425	0.4	114	186
5	5	223	10	131	736	754.173	436	2	1	34	2355	976.64	4095	0.6667	117	1474
5	5	223	10	131	736	754.173	436	2	2	33	1975	703.33	3552	0.4667	127	1472
5	5	223	11	132	1289	763.365	423.4	2	1	38	2749	996.43	4095	0.8421	133	489
5	5	223	11	132	1289	763.365	423.4	2	2	43	2829	923.57	4095	0.4737	143	501
5	5	223	12	133	1368	734.426	321.4	5	1	12	1432	91.03	1593	0.3158	160	426
5	5	223	12	133	1368	734.426	321.4	5	2	17	1511	153.47	1752	0.5263	165	433
5	5	223	12	133	1368	734.426	321.4	5	3	33	2786	864.72	4095	0.7895	175	427
5	5	223	12	133	1368	734.426	321.4	5	4	23	2274	674.55	3636	0.5789	181	423
5	5	223	12	133	1368	734.426	321.4	5	5	26	1491	431.4	2348	0.4211	189	431
5	5	223	13	134	1084	721.783	336.6	2	1	40	1806	446.98	2614	0.4118	164	1078
5	5	223	13	134	1084	721.783	336.6	2	2	37	1752	489.13	2690	0.2941	175	1072
5	5	223	14	135	1287	615.035	190.6	2	1	11	843	67.37	942	0.375	173	1127
5	5	223	14	135	1287	615.035	190.6	2	2	37	2551	1008.71	4095	0.5625	181	1143
5	5	223	15	136	1282	647.244	192.1	2	1	43	2253	677.24	3737	0.6667	191	314
5	5	223	15	136	1282	647.244	192.1	2	2	60	1863	664.53	3599	0.5333	197	288
5	5	223	16	137	752	698.963	348.8	2	1	32	2141	856.08	4015	0.5333	213	408
5	5	223	16	137	752	698.963	348.8	2	2	32	1968	812.05	3866	0.9333	218	400
5	5	223	17	138	668	676.449	252.1	1	1	61	2457	983.45	4095	0.7857	235	741
5	5	223	18	139	656	642.709	225.1	2	1	32	1656	536.87	2862	0.5	236	908
5	5	223	18	139	656	642.709	225.1	2	2	35	2007	718.8	3690	0.5	246	897
5	5	223	19	140	1746	737.078	301.4	4	1	35	1461	473.64	2643	0.55	245	1529
5	5	223	19	140	1746	737.078	301.4	4	2	27	1136	167.87	1563	0.7	255	1537
5	5	223	19	140	1746	737.078	301.4	4	3	32	1773	347.46	2347	0.75	269	1540
5	5	223	19	140	1746	737.078	301.4	4	4	39	2551	819.19	4095	0.3	277	1548
5	5	223	20	141	648	712.489	377.8	2	1	37	2232	1028.15	4095	0.4615	245	668
5	5	223	20	141	648	712.489	377.8	2	2	34	2263	1031.93	4095	0.8462	256	674
5	5	223	21	142	669	693.91	350.4	2	1	35	1825	785.09	3535	0.6429	251	439
5	5	223	21	142	669	693.91	350.4	2	2	34	1924	881.17	3922	0.5714	262	441
5	5	223	22	143	812	685.902	282.9	2	1	31	1488	655.21	2956	0.7333	256	1057
5	5	223	22	143	812	685.902	282.9	2	2	24	1173	382.52	1914	0.3333	269	1060
5	5	223	23	144	894	708.065	313.6	2	1	28	1236	509.7	2326	0.5625	290	345
5	5	223	23	144	894	708.065	313.6	2	2	29	1317	505.8	2399	0.5	296	356
5	5	223	24	145	755	667.886	254.7	1	1	45	3129	934.14	4095	0.2857	316	1580
5	5	223	25	146	794	692.47	279.1	2	1	26	1295	441.39	2219	0.6667	318	414
5	5	223	25	146	794	692.47	279.1	2	2	30	1396	566.63	2640	0.4	330	419
5	5	223	26	147	681	673.457	259	1	1	60	2244	824.67	4069	0.6429	336	1252
5	5	223	27	148	652	673.233	280.6	1	1	60	2078	822.72	4066	0.7857	346	697
5	5	223	28	149	832	717.257	370	2	1	34	1815	776.02	3735	0.5333	355	502
5	5	223	28	149	832	717.257	370	2	2	34	1993	936.1	4082	0.8	366	506
5	5	223	29	150	1095	665.711	231.7	3	1	25	1201	233.05	1570	0.3529	363	344
5	5	223	29	150	1095	665.711	231.7	3	2	25	1255	199.95	1541	0.8824	372	336
5	5	223	29	150	1095	665.711	231.7	3	3	41	2641	1025.71	4095	0.5294	382	343
5	5	223	30	151	1277	786.482	411.7	3	1	36	2387	1028.03	4095	0.6111	370	805
5	5	223	30	151	1277	786.482	411.7	3	2	29	1859	682.14	3448	0.9444	375	797
5	5	223	30	151	1277	786.482	411.7	3	3	28	1688	653.83	3251	0.6667	383	791
5	5	223	31	152	749	627.145	193.1	2	1	35	1870	786.53	3753	1	373	1730
5	5	223	31	152	749	627.145	193.1	2	2	32	2119	682.82	3786	0.3846	377	1740
5	5	223	32	153	1638	704.487	303.5	2	1	64	2416	784.82	4095	0.7647	390	1784
5	5	223	32	153	1638	704.487	303.5	2	2	38	1716	405.79	2707	0.5294	397	1765
5	5	223	33	154	692	666.445	244.5	2	1	37	1948	895.4	3976	0.9286	388	965
5	5	223	33	154	692	666.445	244.5	2	2	34	1998	870.83	4095	0.2857	397	973
5	5	223	34	155	776	631.013	261.6	2	1	34	1591	662.13	3067	0.6	394	508
5	5	223	34	155	776	631.013	261.6	2	2	34	1739	776.75	3691	0.6	395	496
5	5	223	35	156	649	638.74	186	1	1	61	1927	766.51	4095	0.6154	411	279
5	5	223	36	157	823	670.523	312.4	1	1	44	2457	952.4	4095	0.6875	425	365
5	5	223	37	158	1352	658.541	213.1	2	1	39	2484	905.75	4095	0.375	432	1666
5	5	223	37	158	1352	658.541	213.1	2	2	42	1587	404.71	2416	0.3125	439	1647
5	5	223	38	159	806	654.926	223.1	2	1	33	1693	637.43	3031	0.5333	434	869
5	5	223	38	159	806	654.926	223.1	2	2	34	1830	819.25	3671	0.4	445	879
5	5	223	39	160	733	664.603	268.8	1	1	57	1953	707.64	3842	0.4667	473	824
5	5	223	40	161	654	634.339	191.7	2	1	32	1986	783.39	3726	0.4615	472	1430
5	5	223	40	161	654	634.339	191.7	2	2	26	1809	498.33	2792	0.7692	477	1424
5	5	223	41	162	647	678.139	274.2	2	1	33	1743	811.31	3495	0.2857	470	603
5	5	223	41	162	647	678.139	274.2	2	2	32	1712	704.73	3144	0.5	482	604
5	5	223	42	163	794	643.202	232.9	2	1	37	1789	813.3	3706	0.4	476	787
5	5	223	42	163	794	643.202	232.9	2	2	30	1663	727.9	3436	0.6667	480	773
5	5	223	43	164	772	650.098	279.5	2	1	31	1613	609.07	2977	0.6667	480	475
5	5	223	43	164	772	650.098	279.5	2	2	32	1554	644.76	2993	0.6667	490	478
5	5	223	44	165	1123	710.713	321.3	3	1	38	1377	378.89	2306	0.5294	489	1062
5	5	223	44	165	1123	710.713	321.3	3	2	38	2137	951.64	4095	0.7059	497	1077
5	5	223	44	165	1123	710.713	321.3	3	3	16	1726	499.03	2592	0.1176	503	1059
5	5	223	45	166	736	694.688	362.3	2	1	33	2217	965.09	4095	0.6429	496	1657
5	5	223	45	166	736	694.688	362.3	2	2	31	2120	813.94	3831	0.4286	504	1659
5	5	223	46	167	724	632.838	228.9	1	1	38	2476	1068.1	4095	0.4	491	522
5	5	223	47	168	737	653.776	233.6	2	1	32	1699	716.26	3437	0.7143	493	693
5	5	223	47	168	737	653.776	233.6	2	2	35	1781	798.82	3498	0.4286	501	686
5	5	223	48	169	674	587.97	132.9	2	1	27	1517	366.92	2229	0.3846	504	1707
5	5	223	48	169	674	587.97	132.9	2	2	28	1642	577.56	2933	0.9231	506	1698
5	5	223	49	170	1194	765.536	382.7	1	1	54	3398	834.83	4095	0.5263	523	328
5	5	223	50	171	632	673.758	315.2	1	1	37	1373	327.65	1947	0.7692	511	741
5	5	223	51	172	1060	694.753	281.6	2	1	39	1686	458.04	2835	0.6	513	49
5	5	223	51	172	1060	694.753	281.6	2	2	53	1702	660.97	3500	0.6	526	58
5	5	223	52	173	1565	650.394	254.5	2	1	34	1838	780.52	3791	0.8	535	1473
5	5	223	52	173	1565	650.394	254.5	2	2	32	1695	645.15	3241	0.6667	552	1473
5	5	223	53	174	658	697.018	332.9	2	1	30	1866	791.14	3466	0.6429	526	122
5	5	223	53	174	658	697.018	332.9	2	2	29	2114	780.27	3945	0.7857	533	126
5	5	223	54	175	1455	736.197	328.6	2	1	41	2632	1047.6	4095	0.35	539	434
5	5	223	54	175	1455	736.197	328.6	2	2	44	2756	1053.08	4095	0.8	560	433
5	5	223	55	176	1193	741.771	335.2	2	1	40	2715	987.97	4095	0.4211	546	538
5	5	223	55	176	1193	741.771	335.2	2	2	40	2736	992.44	4095	0.5789	551	556
5	5	223	56	177	678	677.047	286	2	1	34	1739	739.21	3349	0.5	549	922
5	5	223	56	177	678	677.047	286	2	2	33	1676	580.56	2823	0.2857	549	933
5	5	223	57	178	607	689.392	313.6	2	1	32	1255	467.7	2341	0.5714	557	222
5	5	223	57	178	607	689.392	313.6	2	2	28	1196	420.19	1998	0.5	567	229
5	5	223	58	179	1715	760.068	340	4	1	43	2699	896.15	4095	0.7619	569	354
5	5	223	58	179	1715	760.068	340	4	2	18	1395	131.78	1618	0.9048	574	363
5	5	223	58	179	1715	760.068	340	4	3	13	1197	213.13	1591	0.5238	581	358
5	5	223	58	179	1715	760.068	340	4	4	23	1124	259.97	1601	0.381	589	367
5	5	223	59	180	679	698.598	355.8	2	1	32	2202	983.53	4095	0.4286	598	847
5	5	223	59	180	679	698.598	355.8	2	2	30	2059	859	4054	0.9286	603	839
5	5	223	60	181	1163	585.687	217.9	2	1	46	2242	805.18	4095	0.8	635	1707
5	5	223	60	181	1163	585.687	217.9	2	2	39	2391	854.99	4095	0.6667	635	1718
5	5	223	61	182	725	648.841	214.5	1	1	43	2865	1064.2	4095	0.5333	627	1455
5	5	223	62	183	819	774.107	464	1	1	39	1793	536.12	2980	0.6667	626	1379
5	5	223	63	184	1386	700.028	314.2	3	1	28	1415	526.6	2509	0.5625	654	835
5	5	223	63	184	1386	700.028	314.2	3	2	30	1638	643.99	2944	0.875	654	844
5	5	223	63	184	1386	700.028	314.2	3	3	36	1856	596.82	3221	0.75	655	860
5	5	223	64	185	709	688.14	299.9	1	1	52	1831	723.05	3730	0.7857	667	764
5	5	223	65	186	1366	683.473	236.8	2	1	37	2498	1030.49	4095	0.5	676	612
5	5	223	65	186	1366	683.473	236.8	2	2	35	2049	853.91	4078	0.4	695	597
5	5	223	66	187	750	700.047	359.9	1	1	41	2013	779.94	4095	0.6667	694	835
5	5	223	67	188	879	641.821	285.2	1	1	59	2033	747.83	3879	0.8125	709	391
5	5	223	68	189	670	729.781	417.6	1	1	43	2448	965.53	4095	0.7692	710	1056
5	5	223	69	190	786	650.901	226.5	2	1	21	1921	827.68	3525	0.2	703	1532
5	5	223	69	190	786	650.901	226.5	2	2	34	1772	711.72	3250	0.5333	719	1519
5	5	223	70	191	815	691.326	323	2	1	33	1933	901.96	3856	0.5333	718	530
5	5	223	70	191	815	691.326	323	2	2	34	1943	895.28	4095	0.5333	727	537
5	5	223	71	192	1454	714.386	317	1	1	68	2977	947.2	4095	0.619	732	1470
5	5	223	72	193	733	731.778	418.9	2	1	34	2143	918.4	4095	0.6	737	1700
5	5	223	72	193	733	731.778	418.9	2	2	37	2137	949.68	4095	0.6	741	1712
5	5	223	73	194	681	710.781	351.3	1	1	38	1975	654.29	3469	0.5714	734	1802
5	5	223	74	195	765	638.068	195.7	2	1	34	2184	973.59	4095	0.2143	740	1652
5	5	223	74	195	765	638.068	195.7	2	2	34	1928	814.71	3958	0.8571	750	1660
5	5	223	75	196	705	690.793	297.4	2	1	37	1721	853.68	3656	0.3333	744	845
5	5	223	75	196	705	690.793	297.4	2	2	35	1965	970.45	4095	0.4	753	829
5	5	223	76	197	735	549.767	113.7	1	1	55	1856	597.28	3328	0.8462	772	1556
5	5	223	77	198	668	665.894	248.4	1	1	51	2218	825.46	4063	0.5	770	674
5	5	223	78	199	642	654.216	241.6	2	1	36	2100	966.85	4095	0.2857	775	1197
5	5	223	78	199	642	654.216	241.6	2	2	36	1854	684.32	3399	0.3571	782	1206
5	5	223	79	200	767	690.879	289.1	1	1	59	2220	911.7	4095	0.9286	798	1136
5	5	223	80	201	1077	807.746	471.2	1	1	63	2180	928.45	4095	0.7222	824	424
5	5	223	81	202	745	668.16	259	2	1	29	1487	548.68	2622	0.3571	827	1530
5	5	223	81	202	745	668.16	259	2	2	36	1790	730.65	3504	0.3571	837	1542
5	5	223	82	203	850	701.611	320.6	1	1	50	1569	607.55	3075	0.6	836	361
5	5	223	83	204	1459	859.209	522.8	3	1	45	2314	826.36	4064	0.7	835	799
5	5	223	83	204	1459	859.209	522.8	3	2	32	2179	892.94	4095	0.95	848	800
5	5	223	83	204	1459	859.209	522.8	3	3	30	2032	794.5	3855	0.6	855	797
5	5	223	84	205	816	749.986	410.4	2	1	26	1271	226.45	1687	0.8667	840	1909
5	5	223	84	205	816	749.986	410.4	2	2	31	1523	537.32	2851	0.5333	851	1909
5	5	223	85	206	743	694.669	309	1	1	41	2362	968.1	4095	0.9231	853	1036
5	5	223	86	207	731	700.803	321.3	1	1	53	2507	913.5	4095	0.6	851	696
5	5	223	87	208	653	691.343	364.4	2	1	23	1459	413.38	2241	0.5	852	63
5	5	223	87	208	653	691.343	364.4	2	2	29	1585	610.3	3018	1	858	59
5	5	223	88	209	1172	724.157	335.9	1	1	59	2984	863.55	4095	0.5789	866	1501
5	5	223	89	210	674	687.73	327.5	2	1	29	1481	600.57	2773	0.2857	869	18
5	5	223	89	210	674	687.73	327.5	2	2	30	1546	634.46	2996	0.7143	869	27
5	5	223	90	211	1417	462.922	79.1	2	1	39	2582	879.08	4095	0.4118	877	1818
5	5	223	90	211	1417	462.922	79.1	2	2	11	899	92.04	1013	0.1176	888	1792
5	5	223	91	212	725	699.902	344.2	1	1	40	2692	992.56	4095	0.5	896	918
5	5	223	92	213	709	690.061	304.4	2	1	14	1160	158.74	1403	0.8	890	759
5	5	223	92	213	709	690.061	304.4	2	2	41	1575	482.84	2888	0.7333	893	752
5	5	223	93	214	631	682.147	281.3	2	1	32	1839	888.53	3932	0.5714	899	189
5	5	223	93	214	631	682.147	281.3	2	2	35	1876	896.27	3780	0.7143	908	191
5	5	223	94	215	1256	728.694	365.4	2	1	35	1540	438.59	2575	0.7895	913	1533
5	5	223	94	215	1256	728.694	365.4	2	2	34	1582	549.06	2729	0.6316	914	1519
5	5	223	95	216	916	692.072	336.6	2	1	32	2294	994.88	4095	0.6875	907	1368
5	5	223	95	216	916	692.072	336.6	2	2	36	2274	1036.37	4095	0.5625	914	1381
5	5	223	96	217	708	678.938	283.6	2	1	25	1184	314.51	1862	0.6923	910	1587
5	5	223	96	217	708	678.938	283.6	2	2	31	1387	379.88	2221	0.5385	919	1581
5	5	223	97	218	830	654.404	228.8	2	1	36	2028	996.73	4095	0.4375	919	907
5	5	223	97	218	830	654.404	228.8	2	2	37	2081	957.64	4095	0.4375	930	911
5	5	223	98	219	734	708.707	326.4	1	1	44	2815	1030.06	4095	0.4667	922	1149
5	5	223	99	220	708	707.491	352.2	2	1	31	1854	813.91	3582	0.6	948	628
5	5	223	99	220	708	707.491	352.2	2	2	32	1784	755.78	3712	0.4667	952	619
5	5	223	100	221	631	684.815	284	2	1	32	1729	779.85	3755	0.3846	938	25
5	5	223	100	221	631	684.815	284	2	2	33	2100	1040.61	4095	0.6154	951	34
5	5	223	101	222	629	715.731	395.5	2	1	34	2083	805.2	3934	0.8571	951	1690
5	5	223	101	222	629	715.731	395.5	2	2	33	2145	853.02	4085	0.6429	958	1686
5	5	223	102	223	1540	685.12	270.1	3	1	37	1970	956.45	4095	0.5	964	838
5	5	223	102	223	1540	685.12	270.1	3	2	39	2642	1003.35	4095	0.5	971	868
5	5	223	102	223	1540	685.12	270.1	3	3	32	1695	712.4	3368	0.5625	979	845
5	5	223	103	224	674	682.436	307.2	2	1	32	1722	689.54	3343	0.7143	995	1022
5	5	223	103	224	674	682.436	307.2	2	2	31	1729	695.75	3255	0.3571	1002	1013
5	5	223	104	225	768	717.552	394.2	1	1	63	2301	936.39	4095	0.8667	1001	1060
5	5	223	105	226	666	699.087	329.5	2	1	28	1085	320.2	1735	0.5	1010	1725
5	5	223	105	226	666	699.087	329.5	2	2	29	1189	313.47	1792	0.5714	1019	1736
5	5	223	106	227	800	653.049	211.9	1	1	37	2521	1039.27	4095	0.4	1018	1569
5	5	223	107	228	719	646.184	185.2	2	1	31	1612	645.28	3043	0.2857	1022	477
5	5	223	107	228	719	646.184	185.2	2	2	33	1641	698.62	3235	0.5714	1035	478
5	5	223	108	229	1311	768.84	375.9	4	1	34	2152	988.43	4095	0.4444	1030	1409
5	5	223	108	229	1311	768.84	375.9	4	2	37	2089	903.3	4042	0.5556	1043	1419
5	5	223	108	229	1311	768.84	375.9	4	3	32	1852	701.11	3540	0.9444	1043	1407
5	5	223	108	229	1311	768.84	375.9	4	4	31	1972	780.88	3946	0.4444	1053	1407
5	5	223	109	230	807	674.281	258.2	1	1	54	1866	685.77	3349	0.6	1042	1203
5	5	223	110	231	952	758.691	433.3	1	1	41	2530	971.5	4095	0.7647	1054	1068
5	5	223	111	232	916	805.523	484	2	1	32	1745	718.53	3275	0.625	1056	390
5	5	223	111	232	916	805.523	484	2	2	32	1706	762.07	3303	0.75	1058	380
5	5	223	112	233	662	653.177	244.6	1	1	47	2521	891.54	4095	0.6154	1080	1335
5	5	223	113	234	1770	739.612	317.6	4	1	35	2011	832.28	3811	0.3889	1093	803
5	5	223	113	234	1770	739.612	317.6	4	2	35	2223	925.2	4095	0.7222	1102	797
5	5	223	113	234	1770	739.612	317.6	4	3	27	1303	247.52	1697	0.5556	1122	802
5	5	223	113	234	1770	739.612	317.6	4	4	32	1545	489.31	2507	0.8889	1122	815
5	5	223	114	235	704	708.349	348.2	1	1	42	1476	487.66	2813	0.9286	1108	1966
5	5	223	115	236	849	628.92	196.5	1	1	37	2490	1050.29	4095	0.3125	1130	1416
5	5	223	116	237	854	764.789	520.3	2	1	32	2496	999.41	4095	0.75	1125	1279
5	5	223	116	237	854	764.789	520.3	2	2	33	2068	989.51	4095	0.6875	1129	1270
5	5	223	117	238	864	646.409	239.8	2	1	31	2004	875.88	3908	0.5625	1131	1311
5	5	223	117	238	864	646.409	239.8	2	2	33	2473	976.71	4095	0.875	1140	1315
5	5	223	118	239	769	656.075	246.3	2	1	35	1846	789.48	3549	0.4667	1146	1138
5	5	223	118	239	769	656.075	246.3	2	2	32	1688	665.88	3247	0.5333	1157	1127
5	5	223	119	240	653	726.698	413.9	2	1	39	2286	1010.41	4095	0.7143	1146	1042
5	5	223	119	240	653	726.698	413.9	2	2	35	1912	896.11	4010	0.5	1155	1031
5	5	223	120	241	867	657.201	236.1	1	1	61	2059	777.85	3934	0.8125	1158	1408
5	5	223	121	242	1412	777.267	389.9	3	1	32	1854	810.71	3830	0.6111	1166	1215
5	5	223	121	242	1412	777.267	389.9	3	2	30	1500	482.33	2615	0.6111	1174	1224
5	5	223	121	242	1412	777.267	389.9	3	3	46	1879	493.18	2751	0.6667	1188	1210
5	5	223	122	243	821	662.524	260	2	1	30	1373	458.91	2227	0.5	1176	1099
5	5	223	122	243	821	662.524	260	2	2	30	1296	518.59	2467	0.4375	1177	1085
5	5	223	123	244	762	686.634	320	1	1	38	2558	1059.86	4095	0.6	1187	1282
5	5	223	124	245	746	707.359	346.6	1	1	44	2566	934.04	4095	0.6667	1193	1448
5	5	223	125	246	769	597.131	101.1	2	1	39	1437	240.5	1866	0.9286	1218	871
5	5	223	125	246	769	597.131	101.1	2	2	26	1774	462.51	2758	0.2857	1227	875
5	5	223	126	247	751	682.923	309.2	2	1	32	1842	653.13	3244	0.6	1219	1126
5	5	223	126	247	751	682.923	309.2	2	2	32	1854	741.1	3534	0.6	1227	1120
5	5	223	127	248	706	671.367	252.5	2	1	33	2313	956.67	4095	0.5	1225	1898
5	5	223	127	248	706	671.367	252.5	2	2	30	2382	775.1	4095	0.7143	1229	1906
5	5	223	128	249	690	691.755	361.6	1	1	43	2070	655.09	3363	0.6667	1241	1217
5	5	223	129	250	1367	848.586	540.3	2	1	38	2246	1032.69	4095	0.5789	1249	1504
5	5	223	129	250	1367	848.586	540.3	2	2	38	2537	982.53	4095	0.9474	1257	1514
5	5	223	130	251	760	648.303	208.6	1	1	43	2594	867.67	4095	0.8	1250	1840
5	5	223	131	252	781	704.225	352.8	1	1	37	2350	1021.18	4095	0.5333	1261	1329
5	5	223	132	253	782	671.778	309.9	1	1	42	2683	972.1	4095	0.5714	1280	1289
5	5	223	133	254	745	686.675	276	2	1	34	2081	979.8	4043	0.5333	1309	885
5	5	223	133	254	745	686.675	276	2	2	32	2230	994.04	4095	0.3333	1313	893
5	5	223	134	255	797	769.005	451.8	2	1	35	2450	1089.7	4095	0.5333	1306	984
5	5	223	134	255	797	769.005	451.8	2	2	32	2640	1064.96	4095	0.6	1313	976
5	5	223	135	256	1596	815.506	420.6	2	1	42	1787	435.08	2840	0.5238	1309	1922
5	5	223	135	256	1596	815.506	420.6	2	2	40	2458	940.44	4095	0.6667	1321	1930
5	5	223	136	257	1537	585.109	132.5	3	1	33	1737	515.42	2915	0.1667	1304	301
5	5	223	136	257	1537	585.109	132.5	3	2	16	1038	95.35	1147	0.8889	1320	308
5	5	223	136	257	1537	585.109	132.5	3	3	17	1013	206.7	1380	0.5	1327	293
5	5	223	137	258	744	670.837	261.4	2	1	22	1307	391.45	2034	0.5333	1314	1124
5	5	223	137	258	744	670.837	261.4	2	2	28	1451	279.07	1974	0.8667	1321	1129
5	5	223	138	259	797	558.203	107.6	1	1	52	1693	279.73	2353	0.8	1329	1306
5	5	223	139	260	920	627.387	199.7	1	1	56	2224	493.77	3761	0.5	1337	1225
5	5	223	140	261	690	662.477	256.4	1	1	36	1851	718.84	3487	0.3333	1337	1867
5	5	223	141	262	782	691.942	345.9	1	1	57	2156	878.18	4095	0.6667	1350	351
5	5	223	142	263	1148	778.029	386.9	2	1	36	2211	1020.51	4095	0.7647	1364	654
5	5	223	142	263	1148	778.029	386.9	2	2	35	2060	974.23	4095	0.4118	1371	672
5	5	223	143	264	974	657.14	289.9	2	1	29	1512	578.9	2777	0.6471	1363	1507
5	5	223	143	264	974	657.14	289.9	2	2	32	1450	595.09	2895	0.4706	1366	1492
5	5	223	144	265	808	784.301	481.2	2	1	26	1311	477.17	2274	0.5	1372	790
5	5	223	144	265	808	784.301	481.2	2	2	28	1409	563.5	2539	0.875	1380	784
5	5	223	145	266	950	665.267	308.1	1	1	59	1901	587.97	3281	0.8235	1384	1541
5	5	223	146	267	815	653.936	260.2	2	1	29	2156	718.41	3651	0.5625	1380	1713
5	5	223	146	267	815	653.936	260.2	2	2	30	1897	638.43	3181	0.6875	1388	1709
5	5	223	147	268	1262	811.54	461.9	2	1	41	2980	1018.15	4095	0.4737	1392	1187
5	5	223	147	268	1262	811.54	461.9	2	2	39	2882	966.37	4095	0.4211	1402	1183
5	5	223	148	269	686	685.417	290.3	1	1	36	1298	265.84	1837	0.7857	1406	1005
5	5	223	149	270	1258	750.818	380.4	4	1	22	1244	393.79	2101	0.4737	1419	1822
5	5	223	149	270	1258	750.818	380.4	4	2	32	1860	743.12	3464	0.3158	1426	1829
5	5	223	149	270	1258	750.818	380.4	4	3	29	1381	386.3	2177	0.8421	1431	1817
5	5	223	149	270	1258	750.818	380.4	4	4	29	1273	350.28	2012	0.3158	1433	1799
5	5	223	150	271	687	728.932	393.5	1	1	61	1911	759.08	3815	0.9286	1430	326
5	5	223	151	272	888	638.019	234.6	2	1	30	1695	556.22	2901	0.875	1436	1315
5	5	223	151	272	888	638.019	234.6	2	2	32	1676	605.96	3056	0.4375	1439	1326
5	5	223	152	273	755	654.423	263.5	2	1	29	1363	388.7	2122	0.8	1443	1760
5	5	223	152	273	755	654.423	263.5	2	2	24	1127	297.35	1762	0.4667	1449	1770
5	5	223	153	274	695	671.999	255.3	1	1	58	1624	451.08	2463	0.5714	1445	523
5	5	223	154	275	811	671.072	263.8	2	1	36	2147	997.77	4095	0.4	1456	1576
5	5	223	154	275	811	671.072	263.8	2	2	30	1708	593.42	3078	0.7333	1456	1587
5	5	223	155	276	805	678.66	291.9	2	1	35	1927	830.78	3939	0.625	1462	1427
5	5	223	155	276	805	678.66	291.9	2	2	36	2132	1008.51	4095	0.5625	1475	1426
5	5	223	156	277	916	646.191	262.5	2	1	31	1574	636.79	3035	0.6875	1497	872
5	5	223	156	277	916	646.191	262.5	2	2	32	1715	699.93	3262	0.3125	1500	881
5	5	223	157	278	607	693.455	316.9	2	1	28	1669	602.09	2830	0.6154	1497	134
5	5	223	157	278	607	693.455	316.9	2	2	26	1665	663.8	2916	0.6923	1501	127
5	5	223	158	279	614	592.019	158.1	1	1	45	1606	383.06	2494	0.3333	1515	1946
5	5	223	159	280	1304	771.601	392.3	2	1	43	3004	931.94	4095	0.85	1521	1305
5	5	223	159	280	1304	771.601	392.3	2	2	38	2876	915.97	4095	0.55	1532	1301
5	5	223	160	281	1167	802.146	459.3	1	1	37	2427	1032.3	4095	0.5789	1531	564
5	5	223	161	282	718	720.845	375.6	1	1	43	2954	964.82	4095	0.6667	1543	1532
5	5	223	162	283	1274	779.002	372.4	2	1	52	1618	527.29	3121	0.5789	1551	1178
5	5	223	162	283	1274	779.002	372.4	2	2	36	1854	721.88	3447	0.6316	1565	1166
5	5	223	163	284	678	692.013	312.2	1	1	49	1431	453.62	2758	0.9286	1571	1686
5	5	223	164	285	690	774.406	504.7	1	1	65	2345	973.58	4095	0.9286	1578	249
5	5	223	165	286	790	669.275	262	2	1	31	2087	813.71	3960	0.6667	1591	1388
5	5	223	165	286	790	669.275	262	2	2	29	1733	663.98	3096	0.6	1594	1382
5	5	223	166	287	774	664.81	238.4	1	1	47	1637	491.03	3008	0.6667	1587	733
5	5	223	167	288	1421	637.883	208.9	3	1	30	1771	510.99	2619	0.6	1599	1265
5	5	223	167	288	1421	637.883	208.9	3	2	28	1973	606.28	3213	0.8667	1607	1261
5	5	223	167	288	1421	637.883	208.9	3	3	39	2278	560.91	3248	0.6	1620	1266
5	5	223	168	289	757	631.939	175.1	2	1	37	1838	748.62	3630	0.8667	1602	1868
5	5	223	168	289	757	631.939	175.1	2	2	28	2014	763.74	3490	0.2	1616	1871
5	5	223	169	290	793	761.335	406.9	2	1	30	1565	572.15	2762	0.625	1604	109
5	5	223	169	290	793	761.335	406.9	2	2	30	1477	519.86	2583	0.4375	1605	120
5	5	223	170	291	688	706.472	364.3	1	1	42	2584	1033.46	4095	0.8462	1607	1049
5	5	223	171	292	691	599.525	164.1	1	1	32	2008	848.98	3953	0.2857	1622	1949
5	5	223	172	293	898	676.439	266.1	2	1	32	1638	609.66	2948	0.7333	1642	1842
5	5	223	172	293	898	676.439	266.1	2	2	36	1731	555.7	2941	0.6667	1656	1843
5	5	223	173	294	663	713.75	364.3	1	1	39	2514	1024.63	4095	0.5714	1642	264
5	5	223	174	295	646	616.721	157.1	1	1	47	1475	481.98	2536	0.2857	1644	201
5	5	223	175	296	772	680.846	268.5	2	1	35	2063	920.19	4071	0.6	1653	1053
5	5	223	175	296	772	680.846	268.5	2	2	35	1989	965.12	4095	0.2667	1667	1057
5	5	223	176	297	1052	687.973	254.4	2	1	36	1902	809.19	3940	0.3529	1671	749
5	5	223	176	297	1052	687.973	254.4	2	2	35	1825	883.35	3940	0.5294	1679	737
5	5	223	177	298	950	730.98	359.9	2	1	33	1581	692.53	3090	0.3529	1679	164
5	5	223	177	298	950	730.98	359.9	2	2	31	1439	533.71	2612	0.7647	1687	150
5	5	223	178	299	732	675.053	301.1	2	1	25	1430	438.76	2336	0.8667	1687	903
5	5	223	178	299	732	675.053	301.1	2	2	33	1978	807.38	3770	0.4667	1693	911
5	5	223	179	300	659	666.041	280.1	2	1	31	1623	605.16	2896	0.5	1696	117
5	5	223	179	300	659	666.041	280.1	2	2	31	1751	708.59	3340	0.8571	1702	108
5	5	223	180	301	696	698.629	317	1	1	41	2648	1037.79	4095	0.4667	1697	1278
5	5	223	181	302	865	648.068	282.7	1	1	54	2052	726.3	3805	0.8125	1701	797
5	5	223	182	303	769	687.678	293.5	2	1	35	1740	685.73	3145	0.3333	1703	963
5	5	223	182	303	769	687.678	293.5	2	2	32	1870	787.8	3878	0.4667	1712	951
5	5	223	183	304	1215	827.682	488.1	1	1	41	2381	797.51	4095	0.5789	1738	567
5	5	223	184	305	664	678.541	260.6	1	1	41	2761	1002.16	4095	0.5714	1735	429
5	5	223	185	306	705	664.94	253.7	2	1	39	1308	240.62	1954	0.3846	1727	1175
5	5	223	185	306	705	664.94	253.7	2	2	11	1162	151.41	1517	0.1538	1730	1168
5	5	223	186	307	869	782.938	492.4	1	1	55	2375	892.65	4095	0.8125	1761	745
5	5	223	187	308	632	634.533	176.1	1	1	40	2551	1004.58	4095	0.2857	1758	237
5	5	223	188	309	1568	779.676	408.9	2	1	32	1753	637.81	3177	0.5	1768	1862
5	5	223	188	309	1568	779.676	408.9	2	2	43	2635	749.7	4095	0.8636	1780	1872
5	5	223	189	310	764	654.522	270.4	1	1	47	1886	593.88	3328	0.5333	1772	639
5	5	223	190	311	880	680.803	307.9	2	1	32	1509	551.43	2749	0.5625	1769	1430
5	5	223	190	311	880	680.803	307.9	2	2	32	1459	587.48	2789	0.5	1783	1434
5	5	223	191	312	1092	745.81	334.9	2	1	32	1863	651.35	3258	0.5	1788	1643
5	5	223	191	312	1092	745.81	334.9	2	2	34	1753	684.69	3305	0.5556	1798	1628
5	5	223	192	313	689	717.313	401.4	2	1	30	1900	701.32	3277	0.7143	1790	555
5	5	223	192	313	689	717.313	401.4	2	2	28	1859	598.04	3115	0.7857	1796	562
5	5	223	193	314	840	644.119	247.6	2	1	30	1618	536.73	2882	0.5	1801	1491
5	5	223	193	314	840	644.119	247.6	2	2	33	1565	519.81	2842	0.5625	1807	1504
5	5	223	194	315	880	674.899	302.3	1	1	50	2054	696.05	3607	0.4375	1801	1468
5	5	223	195	316	1238	790.695	403.7	2	1	40	2745	978.45	4095	0.5263	1816	353
5	5	223	195	316	1238	790.695	403.7	2	2	40	2517	990.26	4095	0.7368	1818	338
5	5	223	196	317	801	690.614	306.9	1	1	45	2798	938.47	4095	0.7857	1817	1560
5	5	223	197	318	883	644.12	251.1	2	1	29	1323	439.46	2227	0.8125	1811	874
5	5	223	197	318	883	644.12	251.1	2	2	32	1589	534.45	2791	0.375	1822	883
5	5	223	198	319	699	657.056	234.1	2	1	26	1224	361.33	1863	0.2143	1826	1718
5	5	223	198	319	699	657.056	234.1	2	2	30	1440	504.3	2760	0.6429	1834	1726
5	5	223	199	320	1803	696.516	283.6	2	1	57	1806	600.63	2955	0.6471	1837	638
5	5	223	199	320	1803	696.516	283.6	2	2	46	2985	990.48	4095	0.6471	1842	609
5	5	223	200	321	706	689.438	286.1	1	1	35	2233	944.19	4095	0.5	1823	1146
5	5	223	201	322	1056	791.853	458.2	2	1	34	2340	949.71	4095	0.4706	1828	258
5	5	223	201	322	1056	791.853	458.2	2	2	32	2323	714.64	3934	0.8235	1835	259
5	5	223	202	323	607	663.591	251.9	2	1	32	1487	564.28	2718	0.3846	1839	103
5	5	223	202	323	607	663.591	251.9	2	2	37	1791	780.61	3528	0.7692	1840	115
5	5	223	203	324	1011	830.086	506.2	2	1	42	1927	659.14	3608	0.4706	1840	479
5	5	223	203	324	1011	830.086	506.2	2	2	52	2012	575.67	3794	0.8824	1853	482
5	5	223	204	325	696	647.626	218.4	2	1	30	1623	606.54	2975	0.6	1845	1415
5	5	223	204	325	696	647.626	218.4	2	2	29	1399	430.13	2292	0.5333	1857	1412
5	5	223	205	326	699	716.037	351.9	1	1	39	2445	883.95	4095	0.6667	1876	1608
5	5	223	206	327	712	722.865	370.6	1	1	63	2018	692.43	3643	1	1882	1463
5	5	223	207	328	668	674.695	276.9	2	1	28	1222	466.93	2119	0.4286	1895	306
5	5	223	207	328	668	674.695	276.9	2	2	28	1363	498.05	2464	0.3571	1900	315
5	5	223	208	329	838	720.648	397.2	1	1	42	1979	652.04	3469	0.6875	1900	1156
5	5	223	209	330	667	699.648	327.3	1	1	19	822	131.38	1061	0.6429	1919	177
5	5	223	210	331	724	654.725	249.5	1	1	38	2112	917.99	4095	0.6667	1936	885
5	5	223	211	332	670	655.091	240.9	3	1	19	991	224.76	1371	0.4286	1934	1640
5	5	223	211	332	670	655.091	240.9	3	2	33	1316	263.66	1903	0.7857	1936	1627
5	5	223	211	332	670	655.091	240.9	3	3	15	986	144.62	1250	0.4286	1941	1638
5	5	223	212	333	1216	615.491	135.7	1	1	47	3176	914.3	4095	0.3158	1943	384
5	5	223	213	334	822	717.236	374.3	1	1	39	2813	992.53	4095	0.75	1958	829
5	5	223	214	335	1145	733.51	329.1	3	1	39	2283	782.7	3881	0.6111	1956	279
5	5	223	214	335	1145	733.51	329.1	3	2	21	1941	498.09	2962	0.8333	1965	281
5	5	223	214	335	1145	733.51	329.1	3	3	29	1693	606.18	3300	0.4444	1971	288
5	5	223	215	336	727	692.253	350.6	1	1	40	2599	928.75	4095	0.7333	1961	1023
5	5	223	216	337	708	706.852	338	1	1	60	1408	392.01	2508	1	1968	1586
5	5	223	217	338	789	710.024	370.2	2	1	33	1961	913.66	3947	0.5333	1964	978
5	5	223	217	338	789	710.024	370.2	2	2	32	1806	708.79	3654	0.7333	1974	979
5	5	223	218	339	1048	804.727	456.6	1	1	42	2454	886.63	4095	0.6111	1980	762
5	5	223	219	340	1188	759.806	356.4	2	1	33	1438	374.42	2208	0.5556	1987	219
5	5	223	219	340	1188	759.806	356.4	2	2	36	1108	196.1	1528	0.6667	1994	233
5	5	223	220	341	1244	737.403	355.8	1	1	47	3147	808.87	4095	0.6842	2003	889
5	5	223	221	342	1217	779.73	391.9	3	1	34	1630	675.73	3303	0.6471	1988	637
5	5	223	221	342	1217	779.73	391.9	3	2	27	1902	867.17	3708	0.4118	1993	623
5	5	223	221	342	1217	779.73	391.9	3	3	32	2409	782.06	3809	0.8824	1997	630
5	5	223	222	343	665	657.221	219.9	1	1	55	1749	609.54	3106	0.7143	2016	482
5	5	223	223	344	658	709.032	350.5	1	1	38	1913	728.86	3668	0.6429	2019	1341
6	6	209	1	345	840	748.221	284.3	2	1	41	1978	788.76	3881	0.8	44	2016
6	6	209	1	345	840	748.221	284.3	2	2	51	1154	154.43	1490	0.3333	58	2018
6	6	209	2	346	940	681.455	183.7	1	1	41	2315	1041.08	4095	0.4118	72	403
6	6	209	3	347	744	701.374	221.1	2	1	36	1339	476.7	2340	0.3333	64	1017
6	6	209	3	347	744	701.374	221.1	2	2	41	1436	435.03	2327	0.4	77	1018
6	6	209	4	348	2143	783.23	334.7	5	1	39	1752	675.66	3269	0.4	79	874
6	6	209	4	348	2143	783.23	334.7	5	2	36	1501	477.42	2504	0.9	82	864
6	6	209	4	348	2143	783.23	334.7	5	3	65	1673	549.58	3201	0.6	95	850
6	6	209	4	348	2143	783.23	334.7	5	4	32	1369	439.71	2294	0.7	106	858
6	6	209	4	348	2143	783.23	334.7	5	5	35	1537	661.48	3055	0.35	115	865
6	6	209	5	349	936	772.872	358.1	2	1	32	1768	633.91	3180	0.4375	89	1421
6	6	209	5	349	936	772.872	358.1	2	2	37	2152	855.14	4064	0.625	94	1414
6	6	209	6	350	816	780.77	353.5	1	1	45	2579	1067.46	4095	0.4	114	543
6	6	209	7	351	670	786.94	475.7	1	1	55	1036	277.45	1647	0.9231	102	973
6	6	209	8	352	1211	772.655	344.6	2	1	39	2197	962.98	4095	0.7368	105	1746
6	6	209	8	352	1211	772.655	344.6	2	2	38	1763	717.07	3393	0.5789	113	1755
6	6	209	9	353	1056	752.696	302.2	2	1	44	1791	541.33	3104	0.375	129	917
6	6	209	9	353	1056	752.696	302.2	2	2	39	2006	854.88	4095	0.875	129	905
6	6	209	10	354	634	686.853	232.7	1	1	42	2159	957.69	4095	0.7143	134	1392
6	6	209	11	355	739	745.212	302.1	1	1	60	1932	645.34	3503	0.6667	145	1606
6	6	209	12	356	1015	745.948	311.5	2	1	37	1350	468.4	2406	0.4706	147	1682
6	6	209	12	356	1015	745.948	311.5	2	2	38	1458	446.51	2531	0.7647	154	1691
6	6	209	13	357	775	746.528	317.9	2	1	42	1967	957.09	4095	0.3125	145	1506
6	6	209	13	357	775	746.528	317.9	2	2	39	1650	711.87	3290	0.4375	163	1502
6	6	209	14	358	986	727.749	297.9	3	1	37	1587	459.77	2701	0.3571	170	1751
6	6	209	14	358	986	727.749	297.9	3	2	58	1542	424.43	2612	0.9286	183	1761
6	6	209	14	358	986	727.749	297.9	3	3	29	1079	217.32	1516	0.5714	193	1770
6	6	209	15	359	1018	728.161	286.9	3	1	39	1240	405.95	2108	0.4286	174	260
6	6	209	15	359	1018	728.161	286.9	3	2	63	1592	617.7	3120	0.6429	185	274
6	6	209	15	359	1018	728.161	286.9	3	3	34	1309	473.11	2242	0.2857	186	247
6	6	209	16	360	641	743.931	315.3	2	1	40	1783	881.44	3904	0.3077	189	344
6	6	209	16	360	641	743.931	315.3	2	2	38	1578	726.99	3467	0.3077	208	343
6	6	209	17	361	706	716.782	319.4	1	1	47	2277	836.03	4095	0.6429	214	1725
6	6	209	18	362	1402	740.967	294.6	4	1	37	1472	613.87	2908	0.875	254	1585
6	6	209	18	362	1402	740.967	294.6	4	2	39	1703	749.09	3522	0.5	256	1597
6	6	209	18	362	1402	740.967	294.6	4	3	37	1770	743.81	3530	0.8125	260	1570
6	6	209	18	362	1402	740.967	294.6	4	4	35	1716	706.08	3373	0.25	264	1559
6	6	209	19	363	1237	719.578	268.6	4	1	36	1356	512.29	2432	0.4667	257	1137
6	6	209	19	363	1237	719.578	268.6	4	2	38	1716	697.11	3082	0.6	266	1162
6	6	209	19	363	1237	719.578	268.6	4	3	33	1221	411.68	2248	0.5333	266	1134
6	6	209	19	363	1237	719.578	268.6	4	4	36	1536	574.68	2961	0.6	275	1164
6	6	209	20	364	1349	733.969	233.1	3	1	16	649	133.99	889	0.5263	265	838
6	6	209	20	364	1349	733.969	233.1	3	2	41	2363	1089.66	4095	0.4211	284	842
6	6	209	20	364	1349	733.969	233.1	3	3	39	1945	782.51	3647	0.3684	286	822
6	6	209	21	365	1260	950.878	661.5	2	1	35	1359	469.73	2466	0.6316	286	1088
6	6	209	21	365	1260	950.878	661.5	2	2	38	1638	527.29	2837	0.8947	295	1089
6	6	209	22	366	774	729.218	282.6	1	1	41	1793	738.94	3466	0.6	331	796
6	6	209	23	367	2053	699.107	222.5	5	1	34	1554	652.64	2988	0.3158	317	910
6	6	209	23	367	2053	699.107	222.5	5	2	63	1648	554.89	3024	0.4211	320	882
6	6	209	23	367	2053	699.107	222.5	5	3	33	1730	693.89	3428	0.3158	320	917
6	6	209	23	367	2053	699.107	222.5	5	4	39	1833	749.47	3567	0.6842	349	896
6	6	209	23	367	2053	699.107	222.5	5	5	37	1690	786.27	3656	0.3684	359	897
6	6	209	24	368	1111	864.044	503.4	2	1	39	1894	823.26	3719	0.5882	337	475
6	6	209	24	368	1111	864.044	503.4	2	2	38	1681	638.42	3348	0.4118	356	479
6	6	209	25	369	974	766.933	316.6	1	1	55	2426	835.83	4095	0.5	350	1497
6	6	209	26	370	940	777.039	374.9	2	1	41	2009	906.95	4095	0.9375	354	1227
6	6	209	26	370	940	777.039	374.9	2	2	38	1777	855.12	3791	0.5	365	1233
6	6	209	27	371	1261	720.867	260.5	3	1	36	1682	693.79	3192	0.5333	351	748
6	6	209	27	371	1261	720.867	260.5	3	2	38	2127	980.77	4095	0.4	351	758
6	6	209	27	371	1261	720.867	260.5	3	3	41	2432	1065.44	4095	0.7333	374	753
6	6	209	28	372	2069	824.846	382.1	5	1	43	2456	1029.98	4095	0.65	369	1303
6	6	209	28	372	2069	824.846	382.1	5	2	34	1303	451.51	2297	0.45	377	1333
6	6	209	28	372	2069	824.846	382.1	5	3	37	1638	697.86	3280	0.7	380	1304
6	6	209	28	372	2069	824.846	382.1	5	4	33	1197	317.87	1937	0.5	385	1338
6	6	209	28	372	2069	824.846	382.1	5	5	35	1690	756.1	3667	0.45	393	1320
6	6	209	29	373	974	701.845	204.9	2	1	39	1813	731.05	3562	0.5294	412	1923
6	6	209	29	373	974	701.845	204.9	2	2	45	1939	722.81	3840	0.3529	418	1909
6	6	209	30	374	1493	615.218	229.5	3	1	36	2111	968.56	4095	0.2143	405	1059
6	6	209	30	374	1493	615.218	229.5	3	2	38	1851	726.45	3658	0.4286	418	1061
6	6	209	30	374	1493	615.218	229.5	3	3	37	1211	342.62	1902	0.4286	433	1015
6	6	209	31	375	698	689.321	210.4	1	1	39	1699	728.64	3396	0.7857	417	1474
6	6	209	32	376	1286	716.114	246.1	3	1	39	1299	478.86	2546	0.4444	419	1659
6	6	209	32	376	1286	716.114	246.1	3	2	46	1338	302.39	1824	0.3333	430	1646
6	6	209	32	376	1286	716.114	246.1	3	3	54	1401	363	2312	0.6667	443	1657
6	6	209	33	377	656	686.405	230.1	2	1	37	1412	576.97	2737	0.2857	427	1748
6	6	209	33	377	656	686.405	230.1	2	2	39	1628	651.95	3353	0.3571	436	1758
6	6	209	34	378	625	687.072	201.4	2	1	33	1754	704.91	3322	0.3571	455	814
6	6	209	34	378	625	687.072	201.4	2	2	32	1797	778.16	3564	0.2857	462	809
6	6	209	35	379	1029	848.521	486.9	2	1	40	2046	907.73	4095	0.4706	451	1804
6	6	209	35	379	1029	848.521	486.9	2	2	39	2138	839.66	4095	0.5882	461	1811
6	6	209	36	380	2097	876.508	424.4	4	1	27	1453	512.79	2586	0.6	459	1522
6	6	209	36	380	2097	876.508	424.4	4	2	51	1390	446.83	2660	0.85	466	1530
6	6	209	36	380	2097	876.508	424.4	4	3	92	2664	871.05	4095	0.9	471	1513
6	6	209	36	380	2097	876.508	424.4	4	4	30	1052	252.26	1694	0.55	468	1543
6	6	209	37	381	630	704.565	214.7	2	1	30	1927	824.63	3755	0.1429	453	1215
6	6	209	37	381	630	704.565	214.7	2	2	39	1609	657.77	3131	0.3571	456	1226
6	6	209	38	382	1049	773.419	347.5	2	1	39	1590	620.29	2958	0.6111	464	1718
6	6	209	38	382	1049	773.419	347.5	2	2	38	1885	640.31	3413	0.6667	472	1724
6	6	209	39	383	782	789.098	399.6	2	1	31	1309	487.32	2373	0.4	466	1106
6	6	209	39	383	782	789.098	399.6	2	2	32	1556	565.85	2919	0.6667	475	1106
6	6	209	40	384	674	621.479	140.6	1	1	55	1277	238.57	1826	0.5333	503	1675
6	6	209	41	385	634	738.552	335.9	2	1	32	1668	676.48	3143	0.6154	504	1456
6	6	209	41	385	634	738.552	335.9	2	2	33	1729	686.96	3407	0.5385	510	1461
6	6	209	42	386	710	659.145	202.7	1	1	58	1294	369.2	2056	0.5	535	1648
6	6	209	43	387	746	617.02	134.9	2	1	38	1597	634.07	3090	0.2143	539	1605
6	6	209	43	387	746	617.02	134.9	2	2	42	1719	606.51	2949	0.5714	541	1627
6	6	209	44	388	775	594.859	110.5	1	1	45	1700	355.74	2346	0.5333	534	503
6	6	209	45	389	644	721.565	257.7	2	1	36	1638	763.91	3655	0.5	534	1042
6	6	209	45	389	644	721.565	257.7	2	2	36	1604	650.08	3141	0.7857	542	1050
6	6	209	46	390	626	706.53	267.9	1	1	70	1997	787.57	3925	0.5	545	1267
6	6	209	47	391	1266	811.543	387.7	3	1	31	1266	334.53	2039	0.4444	551	824
6	6	209	47	391	1266	811.543	387.7	3	2	53	1590	539.64	3053	0.7222	553	813
6	6	209	47	391	1266	811.543	387.7	3	3	36	1413	605.62	3036	0.5	567	808
6	6	209	48	392	645	712.203	305.4	1	1	50	2569	919.59	4095	0.3571	555	607
6	6	209	49	393	1491	703.706	244.7	4	1	38	1830	870.42	3795	0.6875	565	1198
6	6	209	49	393	1491	703.706	244.7	4	2	37	2172	986.68	4095	0.625	574	1204
6	6	209	49	393	1491	703.706	244.7	4	3	37	1962	912.38	4087	0.75	583	1192
6	6	209	49	393	1491	703.706	244.7	4	4	35	2174	998.59	4095	0.375	592	1195
6	6	209	50	394	708	690.336	255.8	2	1	44	1544	588.66	2745	0.5714	580	1232
6	6	209	50	394	708	690.336	255.8	2	2	36	1623	688.64	3251	0.2143	587	1246
6	6	209	51	395	1305	743.687	291.5	2	1	36	2762	1031.15	4095	0.8421	595	1659
6	6	209	51	395	1305	743.687	291.5	2	2	38	2857	978.57	4095	0.4211	603	1654
6	6	209	52	396	670	612.306	108	2	1	30	1312	150.59	1658	0.9286	593	502
6	6	209	52	396	670	612.306	108	2	2	35	1666	447.73	2681	0.4286	598	494
6	6	209	53	397	680	656.984	142.6	2	1	37	1672	704.34	3396	0.2143	599	1861
6	6	209	53	397	680	656.984	142.6	2	2	22	1526	607.78	3206	0.1429	599	1886
6	6	209	54	398	672	799.374	461.3	2	1	34	1763	769.04	3562	0.4286	612	1770
6	6	209	54	398	672	799.374	461.3	2	2	35	1810	802.54	3737	0.9286	620	1773
6	6	209	55	399	1323	775.378	319.6	2	1	41	2464	1003.01	4095	0.8421	639	1643
6	6	209	55	399	1323	775.378	319.6	2	2	43	2748	918.49	4095	0.4211	649	1643
6	6	209	56	400	1857	813.618	428.4	3	1	44	2463	980.43	4095	0.6842	643	214
6	6	209	56	400	1857	813.618	428.4	3	2	24	955	326.12	1630	0.1579	662	252
6	6	209	56	400	1857	813.618	428.4	3	3	29	815	232.82	1323	0.4211	667	232
6	6	209	57	401	627	719.279	314.1	2	1	34	1803	852.14	3664	0.4615	673	837
6	6	209	57	401	627	719.279	314.1	2	2	36	1841	812.56	3722	0.6154	678	845
6	6	209	58	402	649	720.65	277.1	2	1	38	1692	718.74	3528	0.4286	671	963
6	6	209	58	402	649	720.65	277.1	2	2	37	1823	855.12	3703	0.4286	673	949
6	6	209	59	403	715	740.385	340.9	1	1	43	2483	1047.09	4095	0.4667	673	1292
6	6	209	60	404	1296	770.701	329.6	2	1	44	2527	1045.96	4095	0.5789	690	420
6	6	209	60	404	1296	770.701	329.6	2	2	42	2658	1040.6	4095	0.6316	699	429
6	6	209	61	405	1163	764.53	310.8	2	1	42	2488	1030.29	4095	0.3889	704	1161
6	6	209	61	405	1163	764.53	310.8	2	2	47	2667	1017.3	4095	0.5	709	1182
6	6	209	62	406	737	732.068	296.4	1	1	54	2169	740.62	3574	0.4	693	1691
6	6	209	63	407	741	676.267	202.1	2	1	39	2012	984.92	4095	0.2143	694	1239
6	6	209	63	407	741	676.267	202.1	2	2	30	1689	843.16	3384	0.2143	711	1258
6	6	209	64	408	658	723.517	262.2	2	1	39	1675	765.86	3571	0.4286	710	1081
6	6	209	64	408	658	723.517	262.2	2	2	40	1867	973.5	4095	0.6429	711	1069
6	6	209	65	409	717	702.955	255.4	1	1	42	2600	944.3	4095	0.6667	722	1615
6	6	209	66	410	717	718.399	263.6	2	1	35	1446	432	2106	0.7857	728	1733
6	6	209	66	410	717	718.399	263.6	2	2	40	2121	757.68	3873	0.5	734	1741
6	6	209	67	411	773	722.384	293.2	2	1	38	2150	880.14	4095	0.4	731	1846
6	6	209	67	411	773	722.384	293.2	2	2	39	2312	994	4095	0.5333	746	1842
6	6	209	68	412	709	726.031	281.9	1	1	62	2179	950.73	4095	0.8	745	346
6	6	209	69	413	1039	783.103	345.9	1	1	45	2817	1013.11	4095	0.3889	760	113
6	6	209	70	414	1220	689.447	223.3	3	1	44	1124	272.05	1884	0.4667	738	159
6	6	209	70	414	1220	689.447	223.3	3	2	40	1591	677.83	3175	0.6667	758	157
6	6	209	70	414	1220	689.447	223.3	3	3	42	1536	622.94	2901	0.2667	774	169
6	6	209	71	415	1658	882.864	428.6	3	1	39	1742	867.9	3955	0.4211	742	513
6	6	209	71	415	1658	882.864	428.6	3	2	62	1781	753.65	3864	0.6842	756	503
6	6	209	71	415	1658	882.864	428.6	3	3	67	1821	602.2	3482	0.7895	759	527
6	6	209	72	416	950	755.594	335.5	1	1	44	2651	977.79	4095	0.5882	754	1220
6	6	209	73	417	673	666.465	208.7	1	1	39	2065	931.87	4095	0.7143	778	1767
6	6	209	74	418	645	714.581	268.5	1	1	39	2193	1097.13	4095	0.7143	790	799
6	6	209	75	419	733	694.883	301	2	1	34	1754	742.6	3642	0.5	785	1241
6	6	209	75	419	733	694.883	301	2	2	36	1894	767.57	3748	0.6429	794	1241
6	6	209	76	420	691	676.233	255.7	1	1	53	1775	582.45	3135	0.5	807	221
6	6	209	77	421	755	701.801	256.8	2	1	39	1919	895.46	3891	0.6429	799	1090
6	6	209	77	421	755	701.801	256.8	2	2	37	1972	967.27	4095	0.5714	807	1080
6	6	209	78	422	941	761.033	333.8	2	1	38	1845	953.22	4095	0.6471	807	1043
6	6	209	78	422	941	761.033	333.8	2	2	41	1813	776.88	3745	0.4118	818	1054
6	6	209	79	423	1424	731.657	272.4	3	1	38	1795	889.9	3929	0.625	809	861
6	6	209	79	423	1424	731.657	272.4	3	2	39	1927	935.39	4056	0.25	809	872
6	6	209	79	423	1424	731.657	272.4	3	3	61	2246	924.84	4095	0.8125	820	846
6	6	209	80	424	876	706.975	305.2	2	1	33	1727	738.86	3348	0.3125	814	1268
6	6	209	80	424	876	706.975	305.2	2	2	36	1791	713.08	3523	0.5625	822	1270
6	6	209	81	425	1620	888.697	466.1	4	1	44	2717	1067.85	4095	0.5789	827	732
6	6	209	81	425	1620	888.697	466.1	4	2	39	2652	981.17	4095	0.8947	839	732
6	6	209	81	425	1620	888.697	466.1	4	3	33	1995	856.23	4014	0.7895	842	723
6	6	209	81	425	1620	888.697	466.1	4	4	35	2063	998.86	4095	0.3158	844	714
6	6	209	82	426	634	729.055	303.7	1	1	55	1834	655.65	3278	0.5714	839	1907
6	6	209	83	427	1179	781.73	349.2	2	1	43	2410	1017.15	4095	0.4737	852	796
6	6	209	83	427	1179	781.73	349.2	2	2	44	2358	945.26	4095	0.3684	862	805
6	6	209	84	428	736	772.982	370.6	2	1	37	1364	622.5	2841	0.7333	850	479
6	6	209	84	428	736	772.982	370.6	2	2	39	1607	828.55	3706	0.5333	861	482
6	6	209	85	429	691	698.188	223.3	2	1	38	1589	730.47	3486	0.5714	856	393
6	6	209	85	429	691	698.188	223.3	2	2	40	1622	767.38	3469	0.6429	861	405
6	6	209	86	430	977	663.278	196.5	2	1	36	1714	614.51	3016	0.5625	865	1652
6	6	209	86	430	977	663.278	196.5	2	2	36	1794	735.35	3743	0.5	880	1649
6	6	209	87	431	752	692.856	251.3	1	1	41	2244	977.84	4095	0.8	888	1141
6	6	209	88	432	643	704.597	244	2	1	31	1223	355.83	1928	0.5385	888	1812
6	6	209	88	432	643	704.597	244	2	2	39	1700	616.72	3143	0.7692	896	1808
6	6	209	89	433	651	667.456	183.5	1	1	63	1304	380.98	2426	0.8571	901	407
6	6	209	90	434	754	711.336	295.5	2	1	31	1273	479.32	2361	0.8667	906	928
6	6	209	90	434	754	711.336	295.5	2	2	34	1601	718.67	3450	0.4	915	928
6	6	209	91	435	1089	798.384	383.3	3	1	39	1644	667.52	3314	0.9375	915	491
6	6	209	91	435	1089	798.384	383.3	3	2	36	1805	685.3	3244	0.6875	926	496
6	6	209	91	435	1089	798.384	383.3	3	3	37	1744	786.04	3480	0.5625	927	487
6	6	209	92	436	755	742.556	400.6	2	1	36	1968	867.84	3983	0.6667	915	1215
6	6	209	92	436	755	742.556	400.6	2	2	35	1954	883.63	4071	0.7333	921	1207
6	6	209	93	437	631	701.678	291.4	2	1	38	1377	501.61	2365	0.5385	912	95
6	6	209	93	437	631	701.678	291.4	2	2	38	1631	689.39	3216	0.6154	914	83
6	6	209	94	438	680	729.271	362.4	2	1	38	1739	732.51	3344	0.5	943	1157
6	6	209	94	438	680	729.271	362.4	2	2	38	1806	777.24	3702	0.5714	956	1155
6	6	209	95	439	926	671.055	210.6	2	1	38	1391	499.94	2586	0.3125	943	1995
6	6	209	95	439	926	671.055	210.6	2	2	37	1343	430.23	2404	0.5625	961	2001
6	6	209	96	440	666	712.727	300.9	1	1	38	1758	712.61	3473	0.5	984	1821
6	6	209	97	441	676	696.774	260.6	1	1	60	1551	598.26	2983	0.7143	979	1269
6	6	209	98	442	1029	620.147	170.6	2	1	35	1513	648.45	3123	0.625	985	1657
6	6	209	98	442	1029	620.147	170.6	2	2	35	1225	362.16	1933	0.75	989	1669
6	6	209	99	443	1350	722.955	225	1	1	72	2653	878.67	4095	0.75	999	1985
6	6	209	100	444	896	671.385	215.2	1	1	41	1396	440.14	2326	0.25	991	297
6	6	209	101	445	614	717.221	261.8	2	1	39	1689	809.81	3626	0.4286	1009	637
6	6	209	101	445	614	717.221	261.8	2	2	39	1817	847.86	3798	0.2857	1015	648
6	6	209	102	446	649	756.999	415.9	1	1	56	2271	886.03	4095	0.7857	1038	1627
6	6	209	103	447	717	718.091	323.1	2	1	34	2101	1012.3	4095	0.4	1029	1231
6	6	209	103	447	717	718.091	323.1	2	2	35	1944	785.72	3695	0.7333	1035	1224
6	6	209	104	448	780	675.09	249.7	2	1	37	1811	837.59	3841	0.4667	1074	1241
6	6	209	104	448	780	675.09	249.7	2	2	39	2095	1021.76	4095	0.4667	1080	1226
6	6	209	105	449	1862	827.053	382.4	4	1	34	1674	586.37	2959	0.8	1086	1515
6	6	209	105	449	1862	827.053	382.4	4	2	34	1970	899.25	4095	0.8	1089	1507
6	6	209	105	449	1862	827.053	382.4	4	3	37	1706	784.34	3553	0.55	1102	1498
6	6	209	105	449	1862	827.053	382.4	4	4	40	1931	818.44	3987	0.45	1114	1499
6	6	209	106	450	626	727.744	300	2	1	37	1944	988.61	4095	0.7143	1079	466
6	6	209	106	450	626	727.744	300	2	2	35	1788	819.13	3880	0.5	1084	474
6	6	209	107	451	797	726.709	326.6	2	1	38	1881	899.35	3860	0.4	1088	1169
6	6	209	107	451	797	726.709	326.6	2	2	39	2030	939.13	3988	0.5333	1091	1153
6	6	209	108	452	1653	795.866	327.1	3	1	36	1480	586.64	2741	0.3684	1115	858
6	6	209	108	452	1653	795.866	327.1	3	2	35	1943	827.44	3907	0.6842	1118	848
6	6	209	108	452	1653	795.866	327.1	3	3	68	2311	946.4	4095	0.7368	1123	831
6	6	209	109	453	742	705.647	271.8	2	1	32	1418	540.74	2466	0.3077	1105	662
6	6	209	109	453	742	705.647	271.8	2	2	34	1586	636.02	3086	0.3077	1112	665
6	6	209	110	454	763	702.229	314.3	2	1	37	1428	625.88	3033	0.4286	1116	1020
6	6	209	110	454	763	702.229	314.3	2	2	33	1380	476.19	2440	0.7857	1127	1025
6	6	209	111	455	633	718.782	279.3	2	1	26	1089	339.53	1820	0.3571	1124	1656
6	6	209	111	455	633	718.782	279.3	2	2	37	1673	719.5	3430	0.8571	1130	1649
6	6	209	112	456	634	669.233	154.7	2	1	34	1629	657.17	3033	0.3077	1140	296
6	6	209	112	456	634	669.233	154.7	2	2	35	1803	689.77	3458	0.9231	1143	304
6	6	209	113	457	1266	898.644	533.5	1	1	86	3356	795.39	4095	0.4737	1143	1312
6	6	209	114	458	1300	764.442	321.9	2	1	44	2468	905.4	4095	0.5556	1151	994
6	6	209	114	458	1300	764.442	321.9	2	2	42	2093	900.78	4022	0.2778	1174	977
6	6	209	115	459	628	765.454	386.9	2	1	35	1644	630.98	3188	0.5	1150	767
6	6	209	115	459	628	765.454	386.9	2	2	34	1899	929.25	4044	0.5714	1154	759
6	6	209	116	460	2173	792.662	277.4	4	1	39	1627	644.47	3166	0.2857	1175	1476
6	6	209	116	460	2173	792.662	277.4	4	2	33	1972	688.6	3551	0.6667	1184	1485
6	6	209	116	460	2173	792.662	277.4	4	3	38	3128	866.53	4095	0.8571	1189	1493
6	6	209	116	460	2173	792.662	277.4	4	4	41	3092	797.12	4095	0.9048	1198	1495
6	6	209	117	461	1224	785.424	322.8	3	1	61	1749	576.67	3178	0.7647	1193	669
6	6	209	117	461	1224	785.424	322.8	3	2	35	1329	544.12	2711	0.5294	1207	658
6	6	209	117	461	1224	785.424	322.8	3	3	36	1327	523.23	2527	0.4118	1215	670
6	6	209	118	462	1456	751.775	319.4	3	1	32	1554	686.29	3065	0.6875	1191	1067
6	6	209	118	462	1456	751.775	319.4	3	2	31	1346	523.67	2569	0.5625	1191	1074
6	6	209	118	462	1456	751.775	319.4	3	3	44	1707	509.8	2827	0.25	1214	1063
6	6	209	119	463	1910	835.908	456.9	3	1	44	2460	1007.12	4095	0.7368	1202	1238
6	6	209	119	463	1910	835.908	456.9	3	2	55	1982	682.31	3664	0.5263	1211	1204
6	6	209	119	463	1910	835.908	456.9	3	3	46	2242	708	3702	0.7895	1214	1215
6	6	209	120	464	753	751.501	358.4	2	1	33	1563	692.4	3150	0.6	1198	1317
6	6	209	120	464	753	751.501	358.4	2	2	31	1376	557.66	2535	0.8667	1204	1310
6	6	209	121	465	600	764.833	395.1	1	1	42	2727	1075.38	4095	0.6923	1213	484
6	6	209	122	466	749	779.108	398.9	2	1	39	2367	1055.18	4095	0.7857	1228	1381
6	6	209	122	466	749	779.108	398.9	2	2	38	2112	1007.11	4095	0.7143	1230	1392
6	6	209	123	467	610	739.797	336.1	2	1	37	1314	433.3	2287	0.5385	1228	2011
6	6	209	123	467	610	739.797	336.1	2	2	39	1393	504.06	2591	0.5385	1234	2000
6	6	209	124	468	696	765.875	410.1	1	1	52	1854	710.25	3522	0.6429	1249	1104
6	6	209	125	469	1348	802.944	337.6	2	1	36	1659	634.34	3084	0.5	1251	233
6	6	209	125	469	1348	802.944	337.6	2	2	36	1735	673.77	3469	0.5	1257	225
6	6	209	126	470	770	806.169	458.4	2	1	28	1380	590.8	2846	0.4667	1262	695
6	6	209	126	470	770	806.169	458.4	2	2	33	1512	631.38	2933	0.8	1268	690
6	6	209	127	471	683	726.312	318.2	2	1	36	1503	609.5	2865	0.4286	1268	1668
6	6	209	127	471	683	726.312	318.2	2	2	37	1656	708.12	3688	0.5	1274	1679
6	6	209	128	472	694	729.326	300.4	1	1	53	1860	657.09	3516	0.6923	1273	1854
6	6	209	129	473	659	714.692	247.8	1	1	66	1521	596.23	3103	0.7143	1305	308
6	6	209	130	474	660	732.979	301.2	2	1	35	1792	793.61	3615	0.8571	1304	1233
6	6	209	130	474	660	732.979	301.2	2	2	34	1982	871.2	4048	0.4286	1313	1232
6	6	209	131	475	729	703.553	249	1	1	68	1927	666.01	3706	0.6	1311	1650
6	6	209	132	476	1175	837.01	427.1	2	1	44	2748	1005.95	4095	0.5556	1310	1471
6	6	209	132	476	1175	837.01	427.1	2	2	42	2753	949.49	4095	0.6111	1321	1470
6	6	209	133	477	618	746.644	387.5	1	1	68	1463	452.08	2576	0.8571	1315	1805
6	6	209	134	478	943	715.051	251.3	2	1	36	1626	675	3272	0.5	1312	130
6	6	209	134	478	943	715.051	251.3	2	2	36	1531	677.05	3085	0.8125	1320	139
6	6	209	135	479	712	626.049	118.4	1	1	42	1924	583.91	3308	0.8571	1349	1513
6	6	209	136	480	628	709.377	226.9	2	1	29	1214	354.93	2015	0.5385	1356	526
6	6	209	136	480	628	709.377	226.9	2	2	38	1801	738.01	3568	0.7692	1358	516
6	6	209	137	481	641	684.527	223.8	2	1	32	1456	621.2	3048	0.3077	1357	135
6	6	209	137	481	641	684.527	223.8	2	2	38	1354	520.19	2518	0.4615	1367	127
6	6	209	138	482	665	732.83	319	2	1	41	2409	1097.59	4095	0.2857	1355	981
6	6	209	138	482	665	732.83	319	2	2	39	2215	1034.72	4095	0.5	1367	973
6	6	209	139	483	1882	855.288	407.1	4	1	41	2305	900.05	4095	0.7895	1375	932
6	6	209	139	483	1882	855.288	407.1	4	2	26	1520	512.26	2568	0.7368	1379	918
6	6	209	139	483	1882	855.288	407.1	4	3	32	2334	840.3	4072	0.8947	1382	928
6	6	209	139	483	1882	855.288	407.1	4	4	55	2145	800.93	4095	0.8947	1389	914
6	6	209	140	484	1756	869.78	446.3	4	1	28	950	266.89	1575	0.3333	1386	851
6	6	209	140	484	1756	869.78	446.3	4	2	39	2247	916.62	4095	0.8095	1401	867
6	6	209	140	484	1756	869.78	446.3	4	3	34	1352	571.26	2832	0.6667	1405	855
6	6	209	140	484	1756	869.78	446.3	4	4	41	2316	979.75	4095	0.4762	1413	876
6	6	209	141	485	1906	816.819	348.5	5	1	39	1793	646.11	3330	0.5714	1409	1875
6	6	209	141	485	1906	816.819	348.5	5	2	38	1854	578.46	3273	0.4286	1416	1846
6	6	209	141	485	1906	816.819	348.5	5	3	32	1866	472.42	2987	0.5714	1426	1850
6	6	209	141	485	1906	816.819	348.5	5	4	22	1285	214.73	1707	0.8095	1428	1865
6	6	209	141	485	1906	816.819	348.5	5	5	28	1464	288.07	2076	0.4762	1436	1867
6	6	209	142	486	1158	810.622	369.1	2	1	38	1454	735.3	3237	0.3333	1411	1362
6	6	209	142	486	1158	810.622	369.1	2	2	37	1263	502.95	2491	0.8333	1424	1375
6	6	209	143	487	1493	791.293	373.6	4	1	39	2017	1002.33	4095	0.375	1430	1228
6	6	209	143	487	1493	791.293	373.6	4	2	41	2272	1054.96	4095	1	1441	1227
6	6	209	143	487	1493	791.293	373.6	4	3	35	1993	851.09	3812	0.8125	1449	1242
6	6	209	143	487	1493	791.293	373.6	4	4	35	1667	631.35	3223	0.6875	1457	1244
6	6	209	144	488	1817	863.35	409.6	4	1	32	1331	437.88	2374	0.4	1459	1759
6	6	209	144	488	1817	863.35	409.6	4	2	25	1355	327.07	2071	0.65	1465	1764
6	6	209	144	488	1817	863.35	409.6	4	3	57	2165	728.29	3763	0.55	1477	1750
6	6	209	144	488	1817	863.35	409.6	4	4	43	2577	924.38	4095	0.85	1484	1763
6	6	209	145	489	680	832.249	551.6	2	1	33	2463	1109.5	4095	0.5714	1477	950
6	6	209	145	489	680	832.249	551.6	2	2	36	2434	1059.66	4095	0.7143	1482	956
6	6	209	146	490	1199	692.6	224.7	2	1	47	1168	192.54	1668	0.6471	1499	35
6	6	209	146	490	1199	692.6	224.7	2	2	16	988	63.66	1080	0.6471	1502	43
6	6	209	147	491	709	760.904	370.1	2	1	38	1886	860.69	3972	0.5	1488	397
6	6	209	147	491	709	760.904	370.1	2	2	38	2055	1001.76	4095	0.8571	1492	388
6	6	209	148	492	732	675.287	196.3	2	1	34	1214	449.84	2284	0.2857	1497	1356
6	6	209	148	492	732	675.287	196.3	2	2	37	1254	502.1	2371	0.9286	1508	1363
6	6	209	149	493	651	744.524	336.6	2	1	34	1409	648.13	2957	0.5	1503	651
6	6	209	149	493	651	744.524	336.6	2	2	34	1371	588.22	2936	0.6429	1513	657
6	6	209	150	494	633	718.168	322.2	2	1	31	1771	730.65	3291	0.5385	1508	1396
6	6	209	150	494	633	718.168	322.2	2	2	37	1828	816.72	3790	0.6154	1516	1395
6	6	209	151	495	793	770.934	349.8	2	1	36	1514	554.63	2840	0.375	1538	1884
6	6	209	151	495	793	770.934	349.8	2	2	39	1496	505.61	2512	0.625	1539	1899
6	6	209	152	496	622	747.51	337.1	2	1	36	1479	553.02	2807	0.5714	1552	1973
6	6	209	152	496	622	747.51	337.1	2	2	35	1399	483.57	2428	0.7143	1559	1965
6	6	209	153	497	622	729.897	271.3	2	1	37	1687	774.71	3718	0.2308	1547	1640
6	6	209	153	497	622	729.897	271.3	2	2	35	1446	513.33	2722	0.6154	1562	1637
6	6	209	154	498	956	743.015	305	2	1	38	1581	675.48	2969	0.3529	1551	34
6	6	209	154	498	956	743.015	305	2	2	47	1163	393.56	2173	0.5882	1569	36
6	6	209	155	499	634	703.943	248.3	2	1	37	1478	550.25	2891	0.5714	1570	1356
6	6	209	155	499	634	703.943	248.3	2	2	38	1635	754.15	3517	0.4286	1577	1346
6	6	209	156	500	649	780.33	422.2	2	1	32	1501	628.55	3010	0.6429	1581	1286
6	6	209	156	500	649	780.33	422.2	2	2	36	2009	855.06	4027	0.5714	1584	1293
6	6	209	157	501	978	783.376	370.4	2	1	38	1387	610.66	2784	0.5882	1586	1051
6	6	209	157	501	978	783.376	370.4	2	2	36	1408	603.08	2967	0.4706	1602	1044
6	6	209	158	502	1035	701.275	206.6	2	1	35	1280	341.2	1962	0.3529	1588	1085
6	6	209	158	502	1035	701.275	206.6	2	2	44	1708	535.68	2966	0.5294	1603	1086
6	6	209	159	503	1098	895.714	498.2	4	1	29	1209	446.59	2136	0.4706	1599	971
6	6	209	159	503	1098	895.714	498.2	4	2	32	1818	705.34	3518	0.6471	1601	963
6	6	209	159	503	1098	895.714	498.2	4	3	30	1310	425.38	2194	0.4706	1605	952
6	6	209	159	503	1098	895.714	498.2	4	4	19	1406	346.17	2025	0.8824	1607	959
6	6	209	160	504	662	722.085	321.8	1	1	42	2484	1039.3	4095	0.7692	1613	370
6	6	209	161	505	1051	830.911	505.7	2	1	37	1816	751.36	3717	0.9444	1652	1313
6	6	209	161	505	1051	830.911	505.7	2	2	34	1579	555.12	2722	0.5556	1660	1310
6	6	209	162	506	1272	792.388	334.6	1	1	64	3380	820.81	4095	0.9474	1657	368
6	6	209	163	507	880	676.413	226.7	2	1	39	1917	805.66	3953	0.5625	1671	1351
6	6	209	163	507	880	676.413	226.7	2	2	36	1663	653.2	3406	0.75	1681	1359
6	6	209	164	508	1507	849.91	420.9	3	1	37	1494	562.57	2815	0.4444	1681	688
6	6	209	164	508	1507	849.91	420.9	3	2	39	1886	906.81	4095	0.8889	1693	689
6	6	209	164	508	1507	849.91	420.9	3	3	65	1517	629.85	3246	0.6111	1698	671
6	6	209	165	509	1364	855.822	431.9	2	1	45	2893	1006.84	4095	1	1695	771
6	6	209	165	509	1364	855.822	431.9	2	2	43	2828	986.39	4095	0.4211	1697	757
6	6	209	166	510	1132	766.738	374.1	2	1	34	1181	406.03	2227	0.5	1687	1312
6	6	209	166	510	1132	766.738	374.1	2	2	35	1120	411.63	2137	0.5	1706	1315
6	6	209	167	511	606	778.112	431.1	1	1	62	1821	767.3	4095	0.8462	1697	1457
6	6	209	168	512	624	735.55	304	2	1	39	1469	677.53	3216	0.5	1690	1048
6	6	209	168	512	624	735.55	304	2	2	36	1314	529.19	2559	0.6429	1702	1048
6	6	209	169	513	719	779.135	391.6	2	1	36	981	330.7	1648	0.5	1701	338
6	6	209	169	513	719	779.135	391.6	2	2	33	1304	359.56	2144	0.4286	1703	357
6	6	209	170	514	2076	886.119	406.3	5	1	44	2358	966.41	4095	0.5455	1736	112
6	6	209	170	514	2076	886.119	406.3	5	2	40	2116	825.9	3918	0.3182	1747	124
6	6	209	170	514	2076	886.119	406.3	5	3	33	1244	431.53	2336	0.4545	1749	93
6	6	209	170	514	2076	886.119	406.3	5	4	34	1278	361.85	2106	0.8636	1752	102
6	6	209	170	514	2076	886.119	406.3	5	5	41	2076	852.23	4002	0.5909	1768	103
6	6	209	171	515	604	752.252	346.7	2	1	40	1615	805.47	3566	0.4615	1737	937
6	6	209	171	515	604	752.252	346.7	2	2	39	1377	473.24	2432	0.3077	1751	948
6	6	209	172	516	667	737.951	298.3	2	1	39	1765	833.12	3766	0.4286	1740	1176
6	6	209	172	516	667	737.951	298.3	2	2	39	1564	676.76	3144	0.3571	1745	1194
6	6	209	173	517	2072	675.355	292.6	5	1	39	1544	739.56	3430	0.3333	1756	205
6	6	209	173	517	2072	675.355	292.6	5	2	37	1458	627	3065	0.7222	1770	209
6	6	209	173	517	2072	675.355	292.6	5	3	35	1223	333.78	2075	0.3333	1773	219
6	6	209	173	517	2072	675.355	292.6	5	4	33	1050	340.41	1872	0.2778	1801	190
6	6	209	173	517	2072	675.355	292.6	5	5	32	1121	394.48	1994	0.1667	1803	202
6	6	209	174	518	700	758.4	347.9	2	1	33	953	208.83	1344	0.4286	1757	2033
6	6	209	174	518	700	758.4	347.9	2	2	36	1062	345.33	1863	0.6429	1771	2034
6	6	209	175	519	665	770.08	387.4	2	1	38	1619	744.27	3367	0.5	1760	1321
6	6	209	175	519	665	770.08	387.4	2	2	37	1485	578.35	3023	0.6429	1773	1325
6	6	209	176	520	659	706.044	226.2	2	1	37	1320	531.23	2559	0.9231	1777	469
6	6	209	176	520	659	706.044	226.2	2	2	41	1683	715.97	3356	0.3077	1788	473
6	6	209	177	521	601	728.448	310.1	1	1	43	2161	786.98	3723	0.8462	1782	610
6	6	209	178	522	676	790.599	436.2	1	1	44	2700	954.46	4095	0.7143	1783	1496
6	6	209	179	523	694	811.174	451.3	2	1	36	1260	435.33	2439	0.5	1782	1739
6	6	209	179	523	694	811.174	451.3	2	2	37	1261	460.16	2356	0.5	1794	1734
6	6	209	180	524	709	708.233	274.6	1	1	42	1700	566.22	2911	0.5	1804	1929
6	6	209	181	525	887	635.063	160.3	1	1	64	2243	855.76	4095	0.3846	1798	1149
6	6	209	182	526	731	690.222	221	2	1	34	1659	608.21	3055	0.8667	1817	767
6	6	209	182	526	731	690.222	221	2	2	33	1569	656.51	2974	0.4	1821	759
6	6	209	183	527	717	721.144	325	1	1	40	1476	522.24	2928	0.8	1827	815
6	6	209	184	528	952	752.01	311.3	2	1	36	1407	508.72	2666	0.5625	1824	729
6	6	209	184	528	952	752.01	311.3	2	2	38	1467	518.14	2751	0.375	1830	739
6	6	209	185	529	613	717.341	281	2	1	35	1620	435.63	2361	0.2308	1818	1964
6	6	209	185	529	613	717.341	281	2	2	38	1344	435.34	2385	0.5385	1837	1964
6	6	209	186	530	597	707.335	239.5	2	1	33	1426	514.17	2584	0.7692	1846	1407
6	6	209	186	530	597	707.335	239.5	2	2	35	1482	442.93	2604	0.4615	1851	1416
6	6	209	187	531	681	732.686	352.9	1	1	54	1952	623.29	3456	0.9286	1852	843
6	6	209	188	532	708	817.1	534.4	1	1	39	1436	529.7	2627	0.9286	1859	1923
6	6	209	189	533	913	683.396	246.7	2	1	36	888	160.57	1229	0.5	1861	1294
6	6	209	189	533	913	683.396	246.7	2	2	39	1623	668.68	3304	0.375	1875	1294
6	6	209	190	534	659	678.018	193.5	1	1	49	2309	748.13	4095	0.6429	1875	1039
6	6	209	191	535	732	711.526	284.7	2	1	39	1561	714.24	3511	0.4286	1867	1094
6	6	209	191	535	732	711.526	284.7	2	2	39	1866	813.96	3840	0.2857	1880	1104
6	6	209	192	536	1169	838.895	423.2	1	1	48	2864	949.19	4095	0.5556	1874	1351
6	6	209	193	537	714	820.431	491.2	1	1	54	1902	739.41	3649	0.8571	1886	925
6	6	209	194	538	631	770.807	394.6	2	1	38	1457	563.34	2832	0.6429	1890	1567
6	6	209	194	538	631	770.807	394.6	2	2	34	1351	345.76	2052	0.6429	1898	1560
6	6	209	195	539	1094	736.349	304.8	3	1	37	1656	602.58	3015	0.5	1909	1076
6	6	209	195	539	1094	736.349	304.8	3	2	37	1771	590.11	3089	0.6111	1915	1084
6	6	209	195	539	1094	736.349	304.8	3	3	39	1613	625.45	3116	0.4444	1922	1067
6	6	209	196	540	687	707.39	225.6	1	1	41	1823	748.05	3611	0.3571	1928	1885
6	6	209	197	541	725	706.75	271	1	1	43	2307	965.56	4095	0.8667	1942	1110
6	6	209	198	542	654	731.043	304.5	2	1	35	1207	389.14	1967	0.5714	1934	1021
6	6	209	198	542	654	731.043	304.5	2	2	37	1565	624.44	3090	0.5	1941	1032
6	6	209	199	543	688	843.096	573.9	1	1	63	2012	848.41	4095	0.7857	1958	966
6	6	209	200	544	1014	765.688	302.8	3	1	32	1364	534.87	2487	0.6	1961	197
6	6	209	200	544	1014	765.688	302.8	3	2	33	1308	410.61	2297	0.5333	1962	205
6	6	209	200	544	1014	765.688	302.8	3	3	41	1728	853.8	3891	0.2667	1966	183
6	6	209	201	545	1461	723.4	256.5	4	1	37	1235	468.35	2390	0.2667	1974	1349
6	6	209	201	545	1461	723.4	256.5	4	2	37	1459	533.26	2782	0.6667	1976	1334
6	6	209	201	545	1461	723.4	256.5	4	3	39	1420	572.67	2882	0.3333	1982	1304
6	6	209	201	545	1461	723.4	256.5	4	4	38	1644	665.35	3276	0.4	1992	1312
6	6	209	202	546	623	728.059	284.9	2	1	37	1467	572.42	2756	0.4286	1985	1680
6	6	209	202	546	623	728.059	284.9	2	2	40	1350	487.24	2657	0.5714	1995	1691
6	6	209	203	547	1133	828.607	403.9	2	1	44	1103	174.74	1423	0.2222	1986	879
6	6	209	203	547	1133	828.607	403.9	2	2	39	1223	382.63	2042	0.5556	2008	876
6	6	209	204	548	636	751.25	383.3	2	1	33	1508	578.84	2883	0.6429	1997	732
6	6	209	204	548	636	751.25	383.3	2	2	33	1597	624.86	3148	0.7857	2001	740
6	6	209	205	549	638	702.036	250.6	1	1	52	1717	530.56	3063	1	2008	818
6	6	209	206	550	681	777.119	386.3	2	1	32	1178	381.61	2159	0.6429	2007	1854
6	6	209	206	550	681	777.119	386.3	2	2	35	1333	420.23	2261	0.5714	2016	1856
6	6	209	207	551	1054	797.64	365.7	1	1	66	1795	656.11	3623	0.7222	2016	1211
6	6	209	208	552	621	695.559	206.1	2	1	38	1602	652.04	3237	0.7692	2016	1030
6	6	209	208	552	621	695.559	206.1	2	2	34	1532	580.67	2925	0.3846	2018	1040
6	6	209	209	553	657	712.295	285.9	2	1	38	1722	629.75	3174	0.5385	2029	747
6	6	209	209	553	657	712.295	285.9	2	2	37	1593	648.37	3129	0.7692	2034	757
7	7	107	1	554	653	706.534	407.2	1	1	44	1416	404.15	2651	0.6429	15	1279
7	7	107	2	555	708	637.621	245.3	2	1	20	1102	293.77	1595	0.9333	31	1915
7	7	107	2	555	708	637.621	245.3	2	2	17	1076	233.62	1559	0.6667	35	1919
7	7	107	3	556	643	610.571	214.8	2	1	18	1144	282.7	1639	0.6923	74	1713
7	7	107	3	556	643	610.571	214.8	2	2	22	1337	417.15	2132	0.6154	77	1708
7	7	107	4	557	1305	693.433	319.3	2	1	19	1100	282.28	1557	0.5882	101	1753
7	7	107	4	557	1305	693.433	319.3	2	2	41	1938	737.67	3687	0.8824	112	1752
7	7	107	5	558	720	722.394	450.1	1	1	33	1152	285.96	1743	0.8571	121	1512
7	7	107	6	559	1378	734.908	358.7	3	1	24	1478	486.61	2448	0.4118	146	1988
7	7	107	6	559	1378	734.908	358.7	3	2	21	1196	279.26	1718	0.7647	147	1997
7	7	107	6	559	1378	734.908	358.7	3	3	47	2207	773.47	4044	0.8235	166	1994
7	7	107	7	560	966	725.218	367.1	2	1	27	1695	515.45	2706	0.5	151	1733
7	7	107	7	560	966	725.218	367.1	2	2	28	1770	531.86	2957	0.6875	153	1743
7	7	107	8	561	629	645.28	265.2	2	1	22	1582	413.95	2279	0.7692	210	2012
7	7	107	8	561	629	645.28	265.2	2	2	22	1592	413.38	2407	0.5385	217	2012
7	7	107	9	562	637	702.312	368.6	2	1	28	1876	730.68	3310	0.4286	218	1810
7	7	107	9	562	637	702.312	368.6	2	2	27	1919	692.41	3309	0.6429	219	1819
7	7	107	10	563	706	735.865	461.6	1	1	50	1829	643.38	3202	0.8	234	1574
7	7	107	11	564	1341	645.691	258.8	4	1	22	1561	554.65	2516	0.6429	234	530
7	7	107	11	564	1341	645.691	258.8	4	2	20	1515	468.37	2484	1	241	533
7	7	107	11	564	1341	645.691	258.8	4	3	32	2254	996.12	4095	0.7143	269	525
7	7	107	11	564	1341	645.691	258.8	4	4	29	2098	886.26	4057	0.2857	275	533
7	7	107	12	565	1742	745.837	299.5	3	1	30	2738	931.65	4095	0.8	268	1678
7	7	107	12	565	1742	745.837	299.5	3	2	28	3176	757.63	4095	0.85	272	1686
7	7	107	12	565	1742	745.837	299.5	3	3	28	1944	479.15	2844	0.35	284	1691
7	7	107	13	566	1041	797.816	462.9	2	1	36	2302	884.17	4095	0.6471	260	1449
7	7	107	13	566	1041	797.816	462.9	2	2	30	1794	422.14	2576	0.6471	260	1462
7	7	107	14	567	963	755.278	414	2	1	28	1683	612.63	2876	0.6471	261	1534
7	7	107	14	567	963	755.278	414	2	2	30	1784	718.62	3281	0.6471	272	1527
7	7	107	15	568	603	656.844	274	2	1	29	1776	743.05	3225	0.5	280	877
7	7	107	15	568	603	656.844	274	2	2	28	1986	801.14	3706	0.9167	291	875
7	7	107	16	569	598	641.684	224.6	2	1	29	1634	613.65	3063	0.6154	317	1461
7	7	107	16	569	598	641.684	224.6	2	2	30	1637	616.22	3088	0.3077	332	1466
7	7	107	17	570	2026	779.307	335.1	3	1	31	1868	715.24	3360	0.35	330	1226
7	7	107	17	570	2026	779.307	335.1	3	2	32	1997	836.99	3847	0.6	341	1216
7	7	107	17	570	2026	779.307	335.1	3	3	44	3063	961.52	4095	0.75	351	1198
7	7	107	18	571	690	634.686	277.4	2	1	24	1562	510.78	2476	0.7857	341	1962
7	7	107	18	571	690	634.686	277.4	2	2	22	1621	393.48	2390	0.7143	349	1967
7	7	107	19	572	692	689.428	340.2	2	1	27	1804	639.99	3157	0.5714	345	1638
7	7	107	19	572	692	689.428	340.2	2	2	29	1768	709.89	3243	0.5714	349	1629
7	7	107	20	573	641	663.691	276.7	2	1	32	1874	878.27	3809	0.3571	344	1100
7	7	107	20	573	641	663.691	276.7	2	2	29	1825	714.51	3406	0.4286	360	1109
7	7	107	21	574	642	678.097	318.2	2	1	24	1570	564.58	2569	0.5	348	1366
7	7	107	21	574	642	678.097	318.2	2	2	21	1597	427.7	2341	0.9286	354	1363
7	7	107	22	575	1325	740.229	346	2	1	55	2217	781.5	3985	0.7059	373	1896
7	7	107	22	575	1325	740.229	346	2	2	37	2489	924.28	4095	0.7647	374	1877
7	7	107	23	576	655	668.712	275.6	1	1	35	2784	1043.01	4095	0.5	400	992
7	7	107	24	577	703	694.59	340.6	1	1	38	2732	1050.1	4095	0.6429	437	1226
7	7	107	25	578	1526	885.372	527.3	2	1	70	3301	841.56	4095	0.8571	442	1164
7	7	107	25	578	1526	885.372	527.3	2	2	16	1854	325.49	2466	0.5238	452	1167
7	7	107	26	579	789	690.048	299.1	2	1	21	1378	432.77	2160	0.6875	448	752
7	7	107	26	579	789	690.048	299.1	2	2	22	1430	504.22	2438	0.375	460	757
7	7	107	27	580	766	622.033	177.5	2	1	25	1813	787.37	3449	0.6	502	880
7	7	107	27	580	766	622.033	177.5	2	2	25	1855	668.43	3414	0.4667	511	878
7	7	107	28	581	672	670.442	283.3	2	1	33	2076	854.32	3875	0.4615	503	1221
7	7	107	28	581	672	670.442	283.3	2	2	32	1933	868.63	4005	0.9231	506	1212
7	7	107	29	582	824	661.161	274.8	2	1	25	1552	488.56	2440	0.3333	518	1858
7	7	107	29	582	824	661.161	274.8	2	2	28	1752	628.82	3086	0.7333	521	1873
7	7	107	30	583	653	684.078	369.8	2	1	28	1813	719.37	3373	0.5714	519	1465
7	7	107	30	583	653	684.078	369.8	2	2	23	1358	370.95	2147	0.7857	527	1472
7	7	107	31	584	1636	533.814	177	2	1	27	1888	591.59	3118	0.625	584	1826
7	7	107	31	584	1636	533.814	177	2	2	25	1872	612.39	3208	0.5625	595	1825
7	7	107	32	585	734	687.969	293.8	1	1	40	1733	512.42	2911	0.6	601	283
7	7	107	33	586	976	590.48	136.9	1	1	33	1354	130.15	1603	1	603	1500
7	7	107	34	587	1513	738.653	367	4	1	30	1812	742.03	3524	0.5294	617	1325
7	7	107	34	587	1513	738.653	367	4	2	26	1595	617.11	2868	0.7647	618	1356
7	7	107	34	587	1513	738.653	367	4	3	25	1710	559.78	2931	0.8824	619	1335
7	7	107	34	587	1513	738.653	367	4	4	28	1824	690.81	3201	0.5294	629	1357
7	7	107	35	588	766	693.53	364.3	1	1	52	2513	841.42	4095	0.6667	633	1733
7	7	107	36	589	706	676.372	308.2	1	1	31	1844	645.94	3173	0.5333	627	1890
7	7	107	37	590	623	652.687	233.4	2	1	32	2041	965.22	4095	0.5385	629	686
7	7	107	37	590	623	652.687	233.4	2	2	31	2218	1037.16	4095	0.3846	642	695
7	7	107	38	591	829	682.674	296.6	1	1	32	1893	561.01	3083	0.4375	629	1647
7	7	107	39	592	677	641.024	240.4	1	1	41	1541	408.09	2378	0.5714	644	1486
7	7	107	40	593	2178	840.802	407.9	4	1	35	2678	1063.14	4095	0.6364	662	1562
7	7	107	40	593	2178	840.802	407.9	4	2	37	2466	889.65	4095	0.3182	666	1601
7	7	107	40	593	2178	840.802	407.9	4	3	37	2961	915.76	4095	0.5455	672	1565
7	7	107	40	593	2178	840.802	407.9	4	4	36	2823	953.73	4095	0.6364	674	1584
7	7	107	41	594	625	709.749	389.7	1	1	37	2832	946.67	4095	0.7143	668	1159
7	7	107	42	595	807	703.086	358.2	1	1	39	2809	1031.24	4095	0.6667	679	1751
7	7	107	43	596	1932	770.195	399.9	3	1	23	1478	449.59	2372	0.5	681	1854
7	7	107	43	596	1932	770.195	399.9	3	2	26	1470	412.19	2324	0.75	685	1844
7	7	107	43	596	1932	770.195	399.9	3	3	35	2079	794.3	4095	0.65	709	1848
7	7	107	44	597	713	662.453	289.6	2	1	30	2011	837.78	3804	0.4	698	1621
7	7	107	44	597	713	662.453	289.6	2	2	34	2062	878.05	3885	0.5333	700	1634
7	7	107	45	598	713	689.253	328.3	2	1	31	2011	983.56	4095	0.3333	701	1000
7	7	107	45	598	713	689.253	328.3	2	2	31	2013	924.26	3898	0.7333	715	997
7	7	107	46	599	1205	745.829	350.8	1	1	44	3387	766.3	4095	0.5263	743	1713
7	7	107	47	600	784	649.495	267.6	2	1	31	2309	1030.58	4095	0.6667	758	1610
7	7	107	47	600	784	649.495	267.6	2	2	32	2115	842.11	3992	0.5333	768	1612
7	7	107	48	601	721	627.816	247.6	1	1	34	2687	974.38	4095	0.6	763	1194
7	7	107	49	602	935	742.319	371.8	2	1	28	1803	840.88	3764	0.4118	758	1092
7	7	107	49	602	935	742.319	371.8	2	2	30	1726	734.12	3397	0.5882	768	1080
7	7	107	50	603	1356	727.071	333.4	4	1	19	1499	434.33	2410	0.5294	860	1777
7	7	107	50	603	1356	727.071	333.4	4	2	18	1442	335.58	2038	0.7059	864	1785
7	7	107	50	603	1356	727.071	333.4	4	3	30	2187	886.34	4095	0.8824	873	1784
7	7	107	50	603	1356	727.071	333.4	4	4	23	1732	522.88	2839	0.7059	882	1786
7	7	107	51	604	1426	683.799	266.5	4	1	27	1717	585.61	2811	0.875	871	2030
7	7	107	51	604	1426	683.799	266.5	4	2	25	1696	502.16	2631	0.8125	879	2026
7	7	107	51	604	1426	683.799	266.5	4	3	18	1250	347.01	1948	0.875	890	2024
7	7	107	51	604	1426	683.799	266.5	4	4	23	1517	440.71	2296	0.5625	896	2032
7	7	107	52	605	1252	818.118	472.4	1	1	58	3596	674.46	4095	0.8889	887	907
7	7	107	53	606	717	661.711	274.2	2	1	31	1936	760.51	3678	0.5	890	1965
7	7	107	53	606	717	661.711	274.2	2	2	30	1827	635.68	3192	0.4286	895	1976
7	7	107	54	607	681	654.564	261.4	2	1	33	2043	834.84	3862	0.5714	937	1902
7	7	107	54	607	681	654.564	261.4	2	2	32	2040	837.45	4022	0.4286	952	1905
7	7	107	55	608	624	656.519	269.3	2	1	26	1497	549.77	2680	0.2857	947	1044
7	7	107	55	608	624	656.519	269.3	2	2	9	797	127.05	981	0.2857	947	1037
7	7	107	56	609	1499	735.746	377.3	3	1	21	1401	463.14	2401	0.5263	978	1652
7	7	107	56	609	1499	735.746	377.3	3	2	20	1625	463.61	2569	0.8421	983	1662
7	7	107	56	609	1499	735.746	377.3	3	3	46	1734	523.35	2999	0.9474	990	1659
7	7	107	57	610	1126	732.858	317.6	2	1	26	2300	900.32	4061	0.3889	984	1990
7	7	107	57	610	1126	732.858	317.6	2	2	30	2587	818.03	4095	0.7778	991	1993
7	7	107	58	611	935	646.025	197.9	3	1	26	1774	531.55	3030	0.7857	1058	56
7	7	107	58	611	935	646.025	197.9	3	2	28	1912	449.81	2793	0.3571	1066	68
7	7	107	58	611	935	646.025	197.9	3	3	27	1495	602.78	2741	0.3571	1069	44
7	7	107	59	612	1274	795.529	433.1	1	1	33	2069	819.81	4031	0.7368	1066	1645
7	7	107	60	613	1422	765.195	360.4	3	1	42	2059	516.34	3215	0.8824	1082	1450
7	7	107	60	613	1422	765.195	360.4	3	2	27	2130	724.46	3864	0.8235	1092	1454
7	7	107	60	613	1422	765.195	360.4	3	3	30	1978	896.3	4027	0.5294	1103	1444
7	7	107	61	614	623	682.84	334.5	1	1	56	2435	932.18	4095	0.9286	1082	997
7	7	107	62	615	725	657.13	243.4	2	1	29	1863	833.13	3768	0.3571	1088	836
7	7	107	62	615	725	657.13	243.4	2	2	29	1670	730.32	3190	0.3571	1098	815
7	7	107	63	616	1417	786.903	416.8	1	1	53	3277	824.56	4095	0.9	1158	1875
7	7	107	64	617	1533	750.236	346.4	3	1	24	1539	555.73	2809	0.5263	1159	1946
7	7	107	64	617	1533	750.236	346.4	3	2	44	2026	753.11	3881	0.8947	1167	1955
7	7	107	64	617	1533	750.236	346.4	3	3	29	1852	713.9	3470	0.4737	1178	1968
7	7	107	65	618	687	656.086	267.1	2	1	28	2069	778.45	3944	0.9286	1178	1613
7	7	107	65	618	687	656.086	267.1	2	2	29	1998	791.72	3667	0.2857	1180	1604
7	7	107	66	619	683	636.833	231.6	2	1	19	1327	395.02	2000	0.7692	1222	1180
7	7	107	66	619	683	636.833	231.6	2	2	21	1268	318.42	1782	0.8462	1224	1187
7	7	107	67	620	614	647.669	247.3	1	1	48	2338	722.28	4028	0.6154	1233	1036
7	7	107	68	621	638	655.846	255.8	2	1	27	1908	735.71	3375	0.7857	1246	1511
7	7	107	68	621	638	655.846	255.8	2	2	28	1925	714.18	3410	0.5714	1255	1508
7	7	107	69	622	672	645.384	242.9	2	1	27	2138	689.11	3794	0.7857	1263	1154
7	7	107	69	622	672	645.384	242.9	2	2	28	1986	855.13	3838	0.7857	1267	1148
7	7	107	70	623	1340	724.687	328.8	3	1	36	2509	974.15	4095	0.6875	1281	1416
7	7	107	70	623	1340	724.687	328.8	3	2	28	1744	684.65	3110	0.5	1300	1401
7	7	107	70	623	1340	724.687	328.8	3	3	28	1720	605.17	3099	0.3125	1314	1409
7	7	107	71	624	653	656.464	249.8	1	1	31	2007	732.05	3616	0.5714	1291	988
7	7	107	72	625	788	650.976	254.8	2	1	25	1590	498.39	2577	0.75	1294	1933
7	7	107	72	625	788	650.976	254.8	2	2	29	1623	594.17	2888	0.4375	1307	1929
7	7	107	73	626	1175	773.448	400.3	2	1	34	2470	1011.59	4095	0.6667	1328	1222
7	7	107	73	626	1175	773.448	400.3	2	2	34	2694	984.2	4095	0.8333	1338	1221
7	7	107	74	627	704	660.634	264.1	2	1	27	1719	669.24	3104	0.6667	1375	1704
7	7	107	74	627	704	660.634	264.1	2	2	28	1660	558.29	2826	0.4667	1384	1700
7	7	107	75	628	703	626.458	195.4	2	1	31	1940	883.82	3737	0.6154	1375	1060
7	7	107	75	628	703	626.458	195.4	2	2	29	1841	738.81	3513	0.4615	1385	1067
7	7	107	76	629	719	641.679	224.1	2	1	29	2040	785.89	3631	0.4286	1387	991
7	7	107	76	629	719	641.679	224.1	2	2	30	1969	805.15	3669	0.5	1390	982
7	7	107	77	630	647	690.184	331.1	1	1	26	1529	527.98	2545	0.7857	1426	775
7	7	107	78	631	625	680.766	323.5	2	1	29	1847	821.8	3569	0.6429	1434	1200
7	7	107	78	631	625	680.766	323.5	2	2	29	1973	908.87	3935	0.5	1433	1212
7	7	107	79	632	616	629.021	193.8	1	1	45	1797	483.56	2739	0.5	1470	563
7	7	107	80	633	660	638.98	259.8	2	1	25	1743	693.46	3061	0.5714	1503	1400
7	7	107	80	633	660	638.98	259.8	2	2	24	1739	553.72	2834	0.9286	1508	1406
7	7	107	81	634	683	668.764	320.6	2	1	27	1584	622.62	2839	0.6429	1512	1372
7	7	107	81	634	683	668.764	320.6	2	2	28	1719	813.77	3528	0.5714	1522	1366
7	7	107	82	635	679	652.01	250.3	2	1	27	1916	727.29	3493	0.7143	1520	1635
7	7	107	82	635	679	652.01	250.3	2	2	24	1824	594.4	3201	0.5714	1528	1640
7	7	107	83	636	676	647.422	242.4	2	1	27	2231	928.89	4050	0.9286	1534	1262
7	7	107	83	636	676	647.422	242.4	2	2	26	2063	727.19	3524	0.5	1535	1269
7	7	107	84	637	706	654.19	251.4	2	1	22	1418	403.79	2200	0.3333	1547	1543
7	7	107	84	637	706	654.19	251.4	2	2	28	1735	684.17	3200	0.3333	1554	1552
7	7	107	85	638	705	637.881	256.8	1	1	42	1951	496.43	2944	0.6429	1579	1702
7	7	107	86	639	748	649.59	273.4	2	1	24	1521	527.37	2639	0.6667	1617	1679
7	7	107	86	639	748	649.59	273.4	2	2	23	1522	480.01	2602	0.6	1620	1668
7	7	107	87	640	1075	695.222	262.4	2	1	25	1769	551.37	2744	0.3333	1617	1904
7	7	107	87	640	1075	695.222	262.4	2	2	30	1954	716.17	3668	0.5556	1627	1904
7	7	107	88	641	656	656.352	263.5	1	1	43	2368	749.46	4095	0.4286	1629	1628
7	7	107	89	642	748	690.434	376.1	2	1	25	1697	601.07	2943	0.6667	1634	1768
7	7	107	89	642	748	690.434	376.1	2	2	27	2076	847.67	3946	0.6667	1641	1761
7	7	107	90	643	1185	679.195	249.7	1	1	43	2090	600.26	3401	0.7368	1653	1985
7	7	107	91	644	624	676.785	321.3	2	1	24	1480	567.81	2647	0.4286	1636	1251
7	7	107	91	644	624	676.785	321.3	2	2	28	1478	565.31	2866	0.7143	1648	1251
7	7	107	92	645	776	677.878	349.6	2	1	26	1649	524.87	2667	0.8667	1660	1735
7	7	107	92	645	776	677.878	349.6	2	2	22	1675	548.13	2724	0.4667	1661	1726
7	7	107	93	646	627	673.105	298.6	2	1	29	1807	769.99	3637	0.5	1657	913
7	7	107	93	646	627	673.105	298.6	2	2	26	1565	540.75	2726	0.5714	1670	914
7	7	107	94	647	2119	690.562	268	4	1	38	2638	979.74	4095	0.45	1698	1941
7	7	107	94	647	2119	690.562	268	4	2	26	1842	519.25	3009	0.8	1731	1920
7	7	107	94	647	2119	690.562	268	4	3	13	1046	46.74	1108	0.5	1731	1929
7	7	107	94	647	2119	690.562	268	4	4	28	1984	758.26	3522	0.45	1736	1911
7	7	107	95	648	735	685.157	296.4	2	1	23	1393	404.72	2179	0.3333	1739	1609
7	7	107	95	648	735	685.157	296.4	2	2	21	1382	399.15	2222	0.4667	1757	1614
7	7	107	96	649	761	673.143	290.7	2	1	29	1756	666.54	3264	0.5333	1777	1831
7	7	107	96	649	761	673.143	290.7	2	2	29	1668	495.72	2703	0.5333	1788	1838
7	7	107	97	650	838	641.548	257.5	2	1	28	1891	671.77	3468	0.4667	1796	1945
7	7	107	97	650	838	641.548	257.5	2	2	28	1797	616	3253	0.7333	1802	1936
7	7	107	98	651	786	633.62	222.2	2	1	30	1684	573.48	2985	0.4667	1802	2001
7	7	107	98	651	786	633.62	222.2	2	2	30	1928	790.95	3796	0.4667	1818	2003
7	7	107	99	652	624	674.199	310.1	1	1	38	1855	629.94	3023	0.4615	1809	826
7	7	107	100	653	1429	755.766	430.1	2	1	25	1609	463.52	2473	0.9	1838	1768
7	7	107	100	653	1429	755.766	430.1	2	2	28	1576	384.78	2290	0.7	1839	1778
7	7	107	101	654	792	754.876	484.1	2	1	29	2016	813.91	3894	0.7333	1911	1686
7	7	107	101	654	792	754.876	484.1	2	2	21	1756	504.83	2688	0.8	1913	1693
7	7	107	102	655	638	653.663	239.6	2	1	21	1849	562.85	2800	0.9286	1955	1417
7	7	107	102	655	638	653.663	239.6	2	2	25	1966	672.96	3226	0.5	1961	1413
7	7	107	103	656	654	648.43	250.9	2	1	24	1659	385.39	2515	0.9286	1965	2017
7	7	107	103	656	654	648.43	250.9	2	2	26	1877	672.58	3270	0.5	1970	2012
7	7	107	104	657	618	662.989	272.7	1	1	55	2063	700.97	3941	0.7692	1989	990
7	7	107	105	658	638	673.981	290.6	2	1	29	1732	620.76	3234	0.6154	1988	1316
7	7	107	105	658	638	673.981	290.6	2	2	29	1797	690.45	3441	0.6923	1989	1303
7	7	107	106	659	1099	847.211	533.8	2	1	21	1281	319.84	1858	0.6667	1998	1901
7	7	107	106	659	1099	847.211	533.8	2	2	27	1750	624.58	3312	0.7778	2000	1891
7	7	107	107	660	637	617.942	179.1	2	1	26	1056	182.42	1335	0.7857	2000	1968
7	7	107	107	660	637	617.942	179.1	2	2	20	1438	397.82	2238	0.4286	2010	1975

## Sheet: ED3040_Rep2
DatasetName	ImageIndex	TotalCellCount	CellIndex	GlobalCellIndex	NuclearSize	AvgNuclearIntensity	std_NuclearIntensity	Cy5_NumSpotsPerCell	Cy5_SpotIndex	Cy5_SpotSize	Cy5_MeanSpotIntensity	Cy5_std_SpotIntensity	Cy5_MaxSpotIntensity	Cy5_SpotRRD	Cy5_Spot_centroidX	Cy5_Spot_centroidY
ED3040_20171011_oligo_Nuc_rDNA_001	1	35	2	2	436	1980	772	2	1	19	412	90.04	607	0.5455	237	1774
ED3040_20171011_oligo_Nuc_rDNA_001	1	35	2	2	436	1980	772	2	2	23	459	142.62	738	0.4545	239	1764
ED3040_20171011_oligo_Nuc_rDNA_001	1	35	3	3	424	2100	1060	2	1	19	372	99.55	545	0.3636	316	1984
ED3040_20171011_oligo_Nuc_rDNA_001	1	35	3	3	424	2100	1060	2	2	21	373	71.23	571	0.6364	321	1990
ED3040_20171011_oligo_Nuc_rDNA_001	1	35	5	5	486	2020	778.4	1	1	29	654	173.07	975	0.5833	391	1376
ED3040_20171011_oligo_Nuc_rDNA_001	1	35	6	6	518	2010	693.5	1	1	35	648	164.18	953	0.5	421	668
ED3040_20171011_oligo_Nuc_rDNA_001	1	35	7	7	603	1780	610.4	1	1	26	716	232.21	1206	0.6923	428	1528
ED3040_20171011_oligo_Nuc_rDNA_001	1	35	8	8	741	2240	1208.5	2	1	32	677	187.29	984	0.5333	440	558
ED3040_20171011_oligo_Nuc_rDNA_001	1	35	8	8	741	2240	1208.5	2	2	20	553	147.51	838	0.5333	440	566
ED3040_20171011_oligo_Nuc_rDNA_001	1	35	9	9	468	2070	944.7	1	1	38	670	185.88	1009	0.8182	448	1419
ED3040_20171011_oligo_Nuc_rDNA_001	1	35	10	10	680	2360	1270.2	1	1	35	705	173.69	990	0.6154	456	296
ED3040_20171011_oligo_Nuc_rDNA_001	1	35	13	13	496	1840	701.3	2	1	22	541	133.67	847	0.3333	509	208
ED3040_20171011_oligo_Nuc_rDNA_001	1	35	13	13	496	1840	701.3	2	2	21	503	91.49	662	0.6667	518	208
ED3040_20171011_oligo_Nuc_rDNA_001	1	35	14	14	539	1960	766.7	2	1	23	613	207.19	1033	0.6923	575	1700
ED3040_20171011_oligo_Nuc_rDNA_001	1	35	14	14	539	1960	766.7	2	2	24	558	185.84	980	0.3077	588	1700
ED3040_20171011_oligo_Nuc_rDNA_001	1	35	15	15	471	1970	854.2	2	1	25	529	163.19	827	0.6364	588	222
ED3040_20171011_oligo_Nuc_rDNA_001	1	35	15	15	471	1970	854.2	2	2	22	519	172.31	939	0.4545	592	231
ED3040_20171011_oligo_Nuc_rDNA_001	1	35	17	17	544	1820	525.8	2	1	24	508	153.72	891	0.3077	738	1938
ED3040_20171011_oligo_Nuc_rDNA_001	1	35	17	17	544	1820	525.8	2	2	27	502	138.86	839	0.3077	748	1953
ED3040_20171011_oligo_Nuc_rDNA_001	1	35	18	18	754	2230	1223.1	1	1	38	559	159.93	907	0.6667	758	900
ED3040_20171011_oligo_Nuc_rDNA_001	1	35	19	19	593	2230	1189.4	2	1	22	404	98.87	586	0.3846	760	1540
ED3040_20171011_oligo_Nuc_rDNA_001	1	35	19	19	593	2230	1189.4	2	2	22	431	109.02	635	0.6923	766	1550
ED3040_20171011_oligo_Nuc_rDNA_001	1	35	20	20	497	2210	1254.6	1	1	37	574	151.49	903	0.75	771	1315
ED3040_20171011_oligo_Nuc_rDNA_001	1	35	21	21	496	2200	978.1	2	1	22	519	161.19	832	0.5833	807	644
ED3040_20171011_oligo_Nuc_rDNA_001	1	35	21	21	496	2200	978.1	2	2	22	587	192.64	948	0.4167	816	651
ED3040_20171011_oligo_Nuc_rDNA_001	1	35	22	22	494	2110	942.3	1	1	27	619	175.71	1028	0.5	952	1694
ED3040_20171011_oligo_Nuc_rDNA_001	1	35	23	23	526	2080	869	2	1	21	617	183.98	923	0.8333	1008	1220
ED3040_20171011_oligo_Nuc_rDNA_001	1	35	23	23	526	2080	869	2	2	18	567	159.71	879	0.5833	1012	1216
ED3040_20171011_oligo_Nuc_rDNA_001	1	35	24	24	787	2230	1276.1	2	1	22	518	178.24	905	0.4	1159	936
ED3040_20171011_oligo_Nuc_rDNA_001	1	35	24	24	787	2230	1276.1	2	2	21	440	130.42	701	0.8	1169	936
ED3040_20171011_oligo_Nuc_rDNA_001	1	35	25	25	658	2130	944.5	2	1	21	590	216.26	1061	0.3571	1186	199
ED3040_20171011_oligo_Nuc_rDNA_001	1	35	25	25	658	2130	944.5	2	2	23	473	142.18	711	0.3571	1188	212
ED3040_20171011_oligo_Nuc_rDNA_001	1	35	27	27	727	2240	1208.9	2	1	21	652	221.18	1102	0.8667	1294	769
ED3040_20171011_oligo_Nuc_rDNA_001	1	35	27	27	727	2240	1208.9	2	2	20	658	206.85	1028	0.6667	1297	775
ED3040_20171011_oligo_Nuc_rDNA_001	1	35	28	28	883	2040	1132.2	1	1	35	887	287.01	1453	0.6875	1303	530
ED3040_20171011_oligo_Nuc_rDNA_001	1	35	29	29	867	2100	1115.3	2	1	23	508	155.31	828	0.5333	1327	283
ED3040_20171011_oligo_Nuc_rDNA_001	1	35	29	29	867	2100	1115.3	2	2	25	501	117.66	730	0.6667	1337	276
ED3040_20171011_oligo_Nuc_rDNA_001	1	35	30	30	469	2040	824.8	2	1	22	665	231.48	1085	0.5455	1363	525
ED3040_20171011_oligo_Nuc_rDNA_001	1	35	30	30	469	2040	824.8	2	2	24	634	247.84	1203	0.4545	1366	539
ED3040_20171011_oligo_Nuc_rDNA_001	1	35	31	31	819	2040	748.8	2	1	21	564	191.81	921	0.6667	1438	1256
ED3040_20171011_oligo_Nuc_rDNA_001	1	35	31	31	819	2040	748.8	2	2	22	552	135.25	801	0.5333	1440	1267
ED3040_20171011_oligo_Nuc_rDNA_001	1	35	32	32	549	2150	909.9	1	1	28	999	342.76	1629	0.4615	1515	1327
ED3040_20171011_oligo_Nuc_rDNA_001	1	35	34	34	490	2160	993.8	2	1	20	415	122.39	633	0.4167	1677	970
ED3040_20171011_oligo_Nuc_rDNA_001	1	35	34	34	490	2160	993.8	2	2	20	458	141.17	700	0.3333	1680	962
ED3040_20171011_oligo_Nuc_rDNA_001	1	35	35	35	497	2120	898.3	2	1	22	478	163.39	798	0.5	2008	1218
ED3040_20171011_oligo_Nuc_rDNA_001	1	35	35	35	497	2120	898.3	2	2	21	446	107.82	624	0.5	2016	1230
ED3040_20171011_oligo_Nuc_rDNA_002	2	26	1	36	821	2230	1147	2	1	27	534	174.48	885	0.5	275	1776
ED3040_20171011_oligo_Nuc_rDNA_002	2	26	1	36	821	2230	1147	2	2	28	550	187.3	985	0.4375	291	1780
ED3040_20171011_oligo_Nuc_rDNA_002	2	26	3	38	483	2150	835.5	2	1	21	441	111.23	632	0.6667	410	276
ED3040_20171011_oligo_Nuc_rDNA_002	2	26	3	38	483	2150	835.5	2	2	21	461	123.29	760	0.25	418	280
ED3040_20171011_oligo_Nuc_rDNA_002	2	26	4	39	470	2330	1090.5	2	1	26	547	194.28	967	0.5455	512	1262
ED3040_20171011_oligo_Nuc_rDNA_002	2	26	4	39	470	2330	1090.5	2	2	19	500	148.77	814	0.3636	519	1259
ED3040_20171011_oligo_Nuc_rDNA_002	2	26	6	41	498	2030	650	1	1	42	464	115.53	712	0.5455	617	302
ED3040_20171011_oligo_Nuc_rDNA_002	2	26	8	43	668	2040	970.2	2	1	12	288	25.54	340	0.2308	855	981
ED3040_20171011_oligo_Nuc_rDNA_002	2	26	8	43	668	2040	970.2	2	2	33	829	347.84	1585	0.8462	864	963
ED3040_20171011_oligo_Nuc_rDNA_002	2	26	9	44	493	2270	1007.5	2	1	23	545	176.72	827	0.5	918	146
ED3040_20171011_oligo_Nuc_rDNA_002	2	26	9	44	493	2270	1007.5	2	2	21	507	142.57	777	0.5833	925	146
ED3040_20171011_oligo_Nuc_rDNA_002	2	26	10	45	446	1150	206.8	0	NaN	NaN	NaN	NaN	NaN	NaN	NaN	NaN
ED3040_20171011_oligo_Nuc_rDNA_002	2	26	11	46	513	2330	1081.2	1	1	35	790	375.18	1584	0.3333	1153	1060
ED3040_20171011_oligo_Nuc_rDNA_002	2	26	13	48	505	2360	1079.5	2	1	23	517	164.88	809	0.4167	1221	1094
ED3040_20171011_oligo_Nuc_rDNA_002	2	26	13	48	505	2360	1079.5	2	2	24	588	199.97	1009	0.8333	1229	1099
ED3040_20171011_oligo_Nuc_rDNA_002	2	26	14	49	524	2240	861.1	2	1	29	559	216.51	1020	0.2308	1276	843
ED3040_20171011_oligo_Nuc_rDNA_002	2	26	14	49	524	2240	861.1	2	2	22	482	123.57	745	0.4615	1291	835
ED3040_20171011_oligo_Nuc_rDNA_002	2	26	16	51	571	2210	997.7	2	1	21	469	130.2	723	0.5	1441	1778
ED3040_20171011_oligo_Nuc_rDNA_002	2	26	16	51	571	2210	997.7	2	2	22	489	150.42	774	0.4167	1446	1772
ED3040_20171011_oligo_Nuc_rDNA_002	2	26	18	53	509	2310	1176	1	1	39	452	127.71	742	0.6667	1469	1950
ED3040_20171011_oligo_Nuc_rDNA_002	2	26	19	54	489	1940	567.6	1	1	37	604	191.24	1052	0.8333	1568	53
ED3040_20171011_oligo_Nuc_rDNA_002	2	26	20	55	539	2260	954.8	1	1	37	585	161.95	921	0.5385	1648	650
ED3040_20171011_oligo_Nuc_rDNA_002	2	26	21	56	470	1990	777.6	2	1	22	467	127.22	726	0.3636	1652	117
ED3040_20171011_oligo_Nuc_rDNA_002	2	26	21	56	470	1990	777.6	2	2	28	556	204.85	1006	0.8182	1663	115
ED3040_20171011_oligo_Nuc_rDNA_002	2	26	24	59	516	2220	982.2	2	1	28	543	173.47	950	0.4167	1748	1791
ED3040_20171011_oligo_Nuc_rDNA_002	2	26	24	59	516	2220	982.2	2	2	21	445	117.74	682	0.4167	1757	1802
ED3040_20171011_oligo_Nuc_rDNA_002	2	26	25	60	468	2290	1072.4	1	1	43	508	136.13	811	0.5833	1814	1041
ED3040_20171011_oligo_Nuc_rDNA_003	3	41	1	62	486	1800	568.8	1	1	23	514	131.52	746	0.8333	96	1857
ED3040_20171011_oligo_Nuc_rDNA_003	3	41	2	63	530	1800	573.4	2	1	19	490	126.74	738	0.8333	98	1403
ED3040_20171011_oligo_Nuc_rDNA_003	3	41	2	63	530	1800	573.4	2	2	22	554	145.06	866	0.4167	99	1414
ED3040_20171011_oligo_Nuc_rDNA_003	3	41	3	64	457	1810	648.1	2	1	20	504	126.02	729	0.8182	176	314
ED3040_20171011_oligo_Nuc_rDNA_003	3	41	3	64	457	1810	648.1	2	2	20	443	94.77	623	0.4545	184	317
ED3040_20171011_oligo_Nuc_rDNA_003	3	41	5	66	513	2110	1077	2	1	20	464	109.79	658	0.6667	247	1454
ED3040_20171011_oligo_Nuc_rDNA_003	3	41	5	66	513	2110	1077	2	2	19	508	135.1	794	0.6667	254	1459
ED3040_20171011_oligo_Nuc_rDNA_003	3	41	6	67	543	1910	833.9	2	1	21	620	157.19	952	0.5833	348	716
ED3040_20171011_oligo_Nuc_rDNA_003	3	41	6	67	543	1910	833.9	2	2	23	641	173.3	1057	0.75	358	714
ED3040_20171011_oligo_Nuc_rDNA_003	3	41	7	68	539	2030	851.5	1	1	24	832	292.81	1366	0.6154	358	1246
ED3040_20171011_oligo_Nuc_rDNA_003	3	41	8	69	675	1960	980	2	1	23	682	203.11	1094	0.4286	370	294
ED3040_20171011_oligo_Nuc_rDNA_003	3	41	8	69	675	1960	980	2	2	22	565	132.71	795	0.6429	381	301
ED3040_20171011_oligo_Nuc_rDNA_003	3	41	10	71	540	2020	928.8	2	1	20	438	112.41	639	0.4615	412	1876
ED3040_20171011_oligo_Nuc_rDNA_003	3	41	10	71	540	2020	928.8	2	2	21	497	139.31	788	0.7692	422	1873
ED3040_20171011_oligo_Nuc_rDNA_003	3	41	11	72	670	2070	1010.8	1	1	26	573	130.4	827	0.5714	443	1681
ED3040_20171011_oligo_Nuc_rDNA_003	3	41	12	73	551	2100	1003	1	1	24	781	251.77	1291	0.5385	480	1709
ED3040_20171011_oligo_Nuc_rDNA_003	3	41	14	75	559	2090	957.6	2	1	22	667	203.09	988	0.4615	679	1268
ED3040_20171011_oligo_Nuc_rDNA_003	3	41	14	75	559	2090	957.6	2	2	18	561	141.45	787	0.3846	686	1273
ED3040_20171011_oligo_Nuc_rDNA_003	3	41	15	76	596	1780	609	2	1	19	521	134.82	711	0.3846	804	1819
ED3040_20171011_oligo_Nuc_rDNA_003	3	41	15	76	596	1780	609	2	2	18	481	98.55	651	0.7692	812	1812
ED3040_20171011_oligo_Nuc_rDNA_003	3	41	16	77	559	1870	625.5	2	1	21	476	100.52	677	0.6923	831	1778
ED3040_20171011_oligo_Nuc_rDNA_003	3	41	16	77	559	1870	625.5	2	2	18	424	78.7	555	0.5385	831	1790
ED3040_20171011_oligo_Nuc_rDNA_003	3	41	17	78	780	2120	975.4	1	1	32	729	201.94	1195	0.4667	949	701
ED3040_20171011_oligo_Nuc_rDNA_003	3	41	18	79	497	2090	1008.5	2	1	19	435	81.67	568	0.5	950	1709
ED3040_20171011_oligo_Nuc_rDNA_003	3	41	18	79	497	2090	1008.5	2	2	16	437	118.81	677	0.8333	956	1701
ED3040_20171011_oligo_Nuc_rDNA_003	3	41	20	81	820	2210	1275.7	2	1	20	591	187.09	942	0.5625	1028	958
ED3040_20171011_oligo_Nuc_rDNA_003	3	41	20	81	820	2210	1275.7	2	2	20	576	188.52	941	0.6875	1031	947
ED3040_20171011_oligo_Nuc_rDNA_003	3	41	21	82	600	2120	928.6	2	1	22	609	214.59	1108	0.4615	1111	817
ED3040_20171011_oligo_Nuc_rDNA_003	3	41	21	82	600	2120	928.6	2	2	22	638	218.66	1036	0.6923	1117	828
ED3040_20171011_oligo_Nuc_rDNA_003	3	41	22	83	543	2070	852.5	2	1	18	475	109.66	713	0.6154	1148	1920
ED3040_20171011_oligo_Nuc_rDNA_003	3	41	22	83	543	2070	852.5	2	2	14	431	65.59	570	0.6154	1150	1926
ED3040_20171011_oligo_Nuc_rDNA_003	3	41	24	85	603	1680	434.6	2	1	17	405	96.64	603	0.3846	1360	102
ED3040_20171011_oligo_Nuc_rDNA_003	3	41	24	85	603	1680	434.6	2	2	18	401	84.64	563	0.3846	1361	119
ED3040_20171011_oligo_Nuc_rDNA_003	3	41	26	87	577	2100	962.6	2	1	18	602	185.36	949	0.4615	1377	1866
ED3040_20171011_oligo_Nuc_rDNA_003	3	41	26	87	577	2100	962.6	2	2	21	605	137.11	879	0.9231	1383	1866
ED3040_20171011_oligo_Nuc_rDNA_003	3	41	27	88	769	2200	1166.2	2	1	19	488	142.61	746	0.4	1389	836
ED3040_20171011_oligo_Nuc_rDNA_003	3	41	27	88	769	2200	1166.2	2	2	18	534	145.37	805	0.7333	1391	842
ED3040_20171011_oligo_Nuc_rDNA_003	3	41	29	90	366	1150	243.3	0	NaN	NaN	NaN	NaN	NaN	NaN	NaN	NaN
ED3040_20171011_oligo_Nuc_rDNA_003	3	41	30	91	588	1890	818.7	1	1	24	566	167.55	941	0.5385	1519	364
ED3040_20171011_oligo_Nuc_rDNA_003	3	41	31	92	591	1940	946.3	1	1	32	881	244.59	1251	0.5385	1511	522
ED3040_20171011_oligo_Nuc_rDNA_003	3	41	32	93	732	2170	1136.8	2	1	17	568	145.72	827	1	1548	1704
ED3040_20171011_oligo_Nuc_rDNA_003	3	41	32	93	732	2170	1136.8	2	2	21	579	168.71	919	0.5	1555	1701
ED3040_20171011_oligo_Nuc_rDNA_003	3	41	33	94	544	2170	1061.8	1	1	25	805	285.21	1388	0.4615	1563	985
ED3040_20171011_oligo_Nuc_rDNA_003	3	41	35	96	603	1900	637.9	2	1	21	493	119.78	740	0.6154	1710	684
ED3040_20171011_oligo_Nuc_rDNA_003	3	41	35	96	603	1900	637.9	2	2	19	541	165.74	832	0.3077	1721	684
ED3040_20171011_oligo_Nuc_rDNA_003	3	41	37	98	796	2000	841	2	1	23	593	188.4	914	0.3333	1746	264
ED3040_20171011_oligo_Nuc_rDNA_003	3	41	37	98	796	2000	841	2	2	22	534	156.28	801	0.4667	1752	248
ED3040_20171011_oligo_Nuc_rDNA_003	3	41	38	99	578	2050	949.6	2	1	18	483	128.13	718	0.3846	1772	1497
ED3040_20171011_oligo_Nuc_rDNA_003	3	41	38	99	578	2050	949.6	2	2	20	475	121.81	693	0.8462	1782	1496
ED3040_20171011_oligo_Nuc_rDNA_003	3	41	39	100	577	1840	668.5	2	1	20	470	134.6	739	0.6667	1845	46
ED3040_20171011_oligo_Nuc_rDNA_003	3	41	39	100	577	1840	668.5	2	2	19	532	178.1	900	0.1667	1845	64
ED3040_20171011_oligo_Nuc_rDNA_004	4	33	1	103	545	1840	677.2	2	1	23	412	102.89	625	0.3333	25	318
ED3040_20171011_oligo_Nuc_rDNA_004	4	33	1	103	545	1840	677.2	2	2	22	377	81.88	537	0.5	35	327
ED3040_20171011_oligo_Nuc_rDNA_004	4	33	2	104	426	1980	790	2	1	21	448	118.44	657	0.4545	57	579
ED3040_20171011_oligo_Nuc_rDNA_004	4	33	2	104	426	1980	790	2	2	21	510	132	740	0.5455	64	577
ED3040_20171011_oligo_Nuc_rDNA_004	4	33	3	105	437	1810	522.6	2	1	22	381	103.22	568	0.4545	90	333
ED3040_20171011_oligo_Nuc_rDNA_004	4	33	3	105	437	1810	522.6	2	2	20	365	100.68	561	0.4545	103	328
ED3040_20171011_oligo_Nuc_rDNA_004	4	33	4	106	509	1930	698	2	1	22	421	126.08	664	0.3333	151	266
ED3040_20171011_oligo_Nuc_rDNA_004	4	33	4	106	509	1930	698	2	2	23	408	113.29	627	0.5	163	264
ED3040_20171011_oligo_Nuc_rDNA_004	4	33	5	107	623	2200	1097.6	1	1	31	447	104.98	629	0.4615	252	1205
ED3040_20171011_oligo_Nuc_rDNA_004	4	33	6	108	635	2050	850.7	2	1	21	420	120.83	727	0.4615	306	46
ED3040_20171011_oligo_Nuc_rDNA_004	4	33	6	108	635	2050	850.7	2	2	21	377	108.95	637	0.6154	318	45
ED3040_20171011_oligo_Nuc_rDNA_004	4	33	7	109	460	2140	1040.8	2	1	19	448	97.28	630	0.4167	375	1922
ED3040_20171011_oligo_Nuc_rDNA_004	4	33	7	109	460	2140	1040.8	2	2	21	476	106.52	706	0.4167	379	1927
ED3040_20171011_oligo_Nuc_rDNA_004	4	33	8	110	889	2190	1058.8	2	1	25	621	165.31	945	0.5	411	185
ED3040_20171011_oligo_Nuc_rDNA_004	4	33	8	110	889	2190	1058.8	2	2	22	644	198.45	1063	0.375	417	181
ED3040_20171011_oligo_Nuc_rDNA_004	4	33	9	111	507	2180	1003.4	1	1	41	624	188.25	1108	0.6667	596	1862
ED3040_20171011_oligo_Nuc_rDNA_004	4	33	11	113	564	2080	751.5	2	1	24	526	166.44	854	0.2308	687	804
ED3040_20171011_oligo_Nuc_rDNA_004	4	33	11	113	564	2080	751.5	2	2	23	522	154.14	838	0.7692	690	793
ED3040_20171011_oligo_Nuc_rDNA_004	4	33	12	114	732	2170	1056.5	2	1	20	504	144.31	867	0.2667	686	383
ED3040_20171011_oligo_Nuc_rDNA_004	4	33	12	114	732	2170	1056.5	2	2	23	472	131.5	745	0.3333	696	387
ED3040_20171011_oligo_Nuc_rDNA_004	4	33	13	115	505	1880	537.2	2	1	21	434	120.14	656	0.8333	848	117
ED3040_20171011_oligo_Nuc_rDNA_004	4	33	13	115	505	1880	537.2	2	2	22	423	106	613	0.25	859	119
ED3040_20171011_oligo_Nuc_rDNA_004	4	33	14	116	823	2270	1241.4	2	1	22	602	185.83	939	0.6875	913	1912
ED3040_20171011_oligo_Nuc_rDNA_004	4	33	14	116	823	2270	1241.4	2	2	24	543	177.45	938	0.5	920	1901
ED3040_20171011_oligo_Nuc_rDNA_004	4	33	15	117	525	2200	1009.2	2	1	23	467	118.76	737	0.5833	979	1844
ED3040_20171011_oligo_Nuc_rDNA_004	4	33	15	117	525	2200	1009.2	2	2	23	567	194.02	990	0.4167	983	1835
ED3040_20171011_oligo_Nuc_rDNA_004	4	33	16	118	613	1870	496.2	1	1	33	571	126.08	807	0.5385	1031	1766
ED3040_20171011_oligo_Nuc_rDNA_004	4	33	17	119	576	2100	821.1	2	1	22	469	135.65	725	0.3077	1048	1704
ED3040_20171011_oligo_Nuc_rDNA_004	4	33	17	119	576	2100	821.1	2	2	22	526	154.74	818	0.4615	1061	1692
ED3040_20171011_oligo_Nuc_rDNA_004	4	33	19	121	489	2270	1111.5	2	1	21	528	150.87	792	0.4167	1182	1635
ED3040_20171011_oligo_Nuc_rDNA_004	4	33	19	121	489	2270	1111.5	2	2	21	535	157.72	826	0.5	1185	1624
ED3040_20171011_oligo_Nuc_rDNA_004	4	33	20	122	749	2280	1200.3	2	1	21	497	149.82	768	0.4	1190	1421
ED3040_20171011_oligo_Nuc_rDNA_004	4	33	20	122	749	2280	1200.3	2	2	24	494	126.56	793	0.7333	1195	1408
ED3040_20171011_oligo_Nuc_rDNA_004	4	33	21	123	547	2100	839.8	2	1	21	461	136.86	682	0.5385	1194	95
ED3040_20171011_oligo_Nuc_rDNA_004	4	33	21	123	547	2100	839.8	2	2	23	430	108.32	670	0.4615	1206	97
ED3040_20171011_oligo_Nuc_rDNA_004	4	33	22	124	629	1950	611.6	2	1	22	530	136.66	768	0.8462	1344	1521
ED3040_20171011_oligo_Nuc_rDNA_004	4	33	22	124	629	1950	611.6	2	2	9	355	59.62	449	0.6154	1345	1515
ED3040_20171011_oligo_Nuc_rDNA_004	4	33	23	125	541	2270	1053.5	2	1	21	464	140.08	755	0.6154	1353	1337
ED3040_20171011_oligo_Nuc_rDNA_004	4	33	23	125	541	2270	1053.5	2	2	20	489	145.58	820	0.6154	1360	1335
ED3040_20171011_oligo_Nuc_rDNA_004	4	33	25	127	828	2250	1175.1	2	1	19	509	159.77	748	0.6875	1419	599
ED3040_20171011_oligo_Nuc_rDNA_004	4	33	25	127	828	2250	1175.1	2	2	22	556	120.89	750	0.5625	1426	599
ED3040_20171011_oligo_Nuc_rDNA_004	4	33	26	128	527	2280	1076.4	2	1	21	511	171.98	834	0.8333	1418	1635
ED3040_20171011_oligo_Nuc_rDNA_004	4	33	26	128	527	2280	1076.4	2	2	22	570	183.99	951	0.5	1422	1642
ED3040_20171011_oligo_Nuc_rDNA_004	4	33	28	130	507	2240	1069	2	1	20	460	128.96	682	0.8333	1494	1547
ED3040_20171011_oligo_Nuc_rDNA_004	4	33	28	130	507	2240	1069	2	2	22	537	136.63	779	0.4167	1502	1552
ED3040_20171011_oligo_Nuc_rDNA_004	4	33	29	131	533	2180	964.4	2	1	21	570	205.5	984	0.4167	1549	543
ED3040_20171011_oligo_Nuc_rDNA_004	4	33	29	131	533	2180	964.4	2	2	23	491	162.9	853	0.5	1556	533
ED3040_20171011_oligo_Nuc_rDNA_004	4	33	30	132	570	2230	1048.6	2	1	21	432	109.3	646	0.6154	1599	1069
ED3040_20171011_oligo_Nuc_rDNA_004	4	33	30	132	570	2230	1048.6	2	2	19	397	100.88	571	0.6154	1602	1059
ED3040_20171011_oligo_Nuc_rDNA_004	4	33	32	134	596	2080	839.5	2	1	19	473	126.04	715	0.6923	1606	860
ED3040_20171011_oligo_Nuc_rDNA_004	4	33	32	134	596	2080	839.5	2	2	20	439	123.92	735	0.6923	1608	868
ED3040_20171011_oligo_Nuc_rDNA_004	4	33	33	135	544	2130	923.4	1	1	25	522	149.05	850	0.3846	1911	915
ED3040_20171011_oligo_Nuc_rDNA_005	5	32	1	136	579	1840	665.5	2	1	20	314	71.16	473	0.6667	117	479
ED3040_20171011_oligo_Nuc_rDNA_005	5	32	1	136	579	1840	665.5	2	2	18	335	74.52	492	0.5	121	491
ED3040_20171011_oligo_Nuc_rDNA_005	5	32	2	137	801	1960	946.6	1	1	41	564	158.41	849	0.5333	196	115
ED3040_20171011_oligo_Nuc_rDNA_005	5	32	3	138	612	1810	570.1	1	1	49	452	88.98	631	0.6923	312	1056
ED3040_20171011_oligo_Nuc_rDNA_005	5	32	4	139	572	2010	1008.5	2	1	22	371	89.35	542	0.6154	312	1150
ED3040_20171011_oligo_Nuc_rDNA_005	5	32	4	139	572	2010	1008.5	2	2	20	419	110.73	612	0.6923	313	1158
ED3040_20171011_oligo_Nuc_rDNA_005	5	32	5	140	872	2040	1013.5	2	1	23	529	156.87	874	0.5625	360	614
ED3040_20171011_oligo_Nuc_rDNA_005	5	32	5	140	872	2040	1013.5	2	2	24	553	156.17	850	0.5625	372	616
ED3040_20171011_oligo_Nuc_rDNA_005	5	32	7	142	670	2070	1100.4	1	1	39	544	161.39	879	0.5714	465	715
ED3040_20171011_oligo_Nuc_rDNA_005	5	32	9	144	593	2040	1007.3	1	1	27	454	106.45	669	0.3846	500	821
ED3040_20171011_oligo_Nuc_rDNA_005	5	32	10	145	568	2040	1048	2	1	16	361	62.85	461	0.4167	506	1178
ED3040_20171011_oligo_Nuc_rDNA_005	5	32	10	145	568	2040	1048	2	2	21	451	113.47	685	0.8333	514	1177
ED3040_20171011_oligo_Nuc_rDNA_005	5	32	11	146	683	2100	1115.4	2	1	21	409	111.31	693	0.5714	527	875
ED3040_20171011_oligo_Nuc_rDNA_005	5	32	11	146	683	2100	1115.4	2	2	23	411	100.73	615	0.4286	538	887
ED3040_20171011_oligo_Nuc_rDNA_005	5	32	12	147	541	2120	1074.3	1	1	26	531	153.46	834	0.6923	765	1365
ED3040_20171011_oligo_Nuc_rDNA_005	5	32	13	148	714	2090	1010	1	1	28	655	187.44	1036	0.4286	785	1475
ED3040_20171011_oligo_Nuc_rDNA_005	5	32	15	150	495	1680	754.6	1	1	25	292	42.85	385	0.6667	1013	989
ED3040_20171011_oligo_Nuc_rDNA_005	5	32	17	152	598	2170	1218.8	1	1	26	758	263.8	1301	0.5385	1070	1193
ED3040_20171011_oligo_Nuc_rDNA_005	5	32	18	153	567	2060	981.7	2	1	21	492	131.34	756	0.3077	1070	290
ED3040_20171011_oligo_Nuc_rDNA_005	5	32	18	153	567	2060	981.7	2	2	23	417	65.85	546	0.6154	1076	284
ED3040_20171011_oligo_Nuc_rDNA_005	5	32	19	154	543	1970	884.3	2	1	20	369	99.26	529	0.4615	1079	113
ED3040_20171011_oligo_Nuc_rDNA_005	5	32	19	154	543	1970	884.3	2	2	21	430	131.2	742	0.3846	1081	124
ED3040_20171011_oligo_Nuc_rDNA_005	5	32	20	155	673	1920	795.5	2	1	22	473	145.79	769	0.3571	1090	1035
ED3040_20171011_oligo_Nuc_rDNA_005	5	32	20	155	673	1920	795.5	2	2	24	487	123.37	742	0.3571	1109	1039
ED3040_20171011_oligo_Nuc_rDNA_005	5	32	21	156	811	2110	1171	1	1	29	507	151.77	869	0.6	1099	463
ED3040_20171011_oligo_Nuc_rDNA_005	5	32	22	157	641	2160	1244.7	2	1	21	509	178.14	843	0.5385	1134	893
ED3040_20171011_oligo_Nuc_rDNA_005	5	32	22	157	641	2160	1244.7	2	2	20	529	140.22	780	0.5385	1138	900
ED3040_20171011_oligo_Nuc_rDNA_005	5	32	23	158	608	2110	1008	2	1	16	357	69.55	478	0.2308	1195	754
ED3040_20171011_oligo_Nuc_rDNA_005	5	32	23	158	608	2110	1008	2	2	22	410	94.68	581	0.6923	1201	750
ED3040_20171011_oligo_Nuc_rDNA_005	5	32	24	159	817	2150	1220.7	2	1	21	415	128.75	713	0.4375	1299	304
ED3040_20171011_oligo_Nuc_rDNA_005	5	32	24	159	817	2150	1220.7	2	2	20	401	115.4	659	0.375	1309	320
ED3040_20171011_oligo_Nuc_rDNA_005	5	32	25	160	641	1870	651.3	2	1	23	396	100.01	596	0.3571	1356	128
ED3040_20171011_oligo_Nuc_rDNA_005	5	32	25	160	641	1870	651.3	2	2	20	388	100.26	597	0.6429	1369	128
ED3040_20171011_oligo_Nuc_rDNA_005	5	32	26	161	662	2080	1020.1	2	1	19	534	150.06	830	0.7857	1426	969
ED3040_20171011_oligo_Nuc_rDNA_005	5	32	26	161	662	2080	1020.1	2	2	21	507	136.55	753	0.4286	1432	969
ED3040_20171011_oligo_Nuc_rDNA_005	5	32	27	162	604	1950	906	1	1	36	528	123.57	804	0.5385	1708	1883
ED3040_20171011_oligo_Nuc_rDNA_005	5	32	28	163	552	1810	711.6	2	1	19	298	38.17	365	0.75	1825	32
ED3040_20171011_oligo_Nuc_rDNA_005	5	32	28	163	552	1810	711.6	2	2	18	318	60.5	421	0.5	1831	41
ED3040_20171011_oligo_Nuc_rDNA_005	5	32	29	164	627	1940	732.8	1	1	32	549	126.35	833	0.8462	1888	1453
ED3040_20171011_oligo_Nuc_rDNA_005	5	32	30	165	701	1830	668.4	2	1	19	475	108.25	645	0.7143	1961	1897
ED3040_20171011_oligo_Nuc_rDNA_005	5	32	30	165	701	1830	668.4	2	2	17	401	79.19	536	0.2857	1962	1891
ED3040_20171011_oligo_Nuc_rDNA_005	5	32	31	166	788	2100	1146.5	2	1	19	479	137.04	708	0.6	1986	1979
ED3040_20171011_oligo_Nuc_rDNA_005	5	32	31	166	788	2100	1146.5	2	2	19	468	98.8	715	0.8667	1988	1986
ED3040_20171011_oligo_Nuc_rDNA_005	5	32	32	167	516	1930	769.5	1	1	38	400	84.5	552	0.6667	1989	367
ED3040_20171011_oligo_Nuc_rDNA_006	6	32	1	168	441	2050	670.9	2	1	22	371	94.15	533	0.3636	77	509
ED3040_20171011_oligo_Nuc_rDNA_006	6	32	1	168	441	2050	670.9	2	2	26	451	125.92	668	0.7273	86	517
ED3040_20171011_oligo_Nuc_rDNA_006	6	32	2	169	499	2190	1002.8	2	1	20	378	87.69	567	0.3333	106	1665
ED3040_20171011_oligo_Nuc_rDNA_006	6	32	2	169	499	2190	1002.8	2	2	18	369	74.31	503	0.8333	105	1675
ED3040_20171011_oligo_Nuc_rDNA_006	6	32	3	170	467	2180	943.6	2	1	21	382	82.77	573	0.5	206	1703
ED3040_20171011_oligo_Nuc_rDNA_006	6	32	3	170	467	2180	943.6	2	2	20	420	113.54	653	0.5	207	1715
ED3040_20171011_oligo_Nuc_rDNA_006	6	32	5	172	604	2280	1058.2	1	1	23	562	199.72	930	0.3846	333	439
ED3040_20171011_oligo_Nuc_rDNA_006	6	32	6	173	561	2240	955.6	1	1	31	504	124.84	727	0.6923	336	354
ED3040_20171011_oligo_Nuc_rDNA_006	6	32	7	174	493	2220	970.7	2	1	19	457	91.91	623	0.5833	400	1744
ED3040_20171011_oligo_Nuc_rDNA_006	6	32	7	174	493	2220	970.7	2	2	22	480	142.68	800	0.4167	404	1738
ED3040_20171011_oligo_Nuc_rDNA_006	6	32	10	177	609	2350	1226.4	2	1	22	470	143.51	739	0.6154	495	902
ED3040_20171011_oligo_Nuc_rDNA_006	6	32	10	177	609	2350	1226.4	2	2	21	403	111.01	587	0.5385	507	901
ED3040_20171011_oligo_Nuc_rDNA_006	6	32	11	178	521	2150	895	2	1	21	422	118.52	671	0.6667	505	1971
ED3040_20171011_oligo_Nuc_rDNA_006	6	32	11	178	521	2150	895	2	2	21	404	98.6	619	0.5	513	1975
ED3040_20171011_oligo_Nuc_rDNA_006	6	32	12	179	455	2180	866.4	1	1	35	523	125.48	764	0.4167	514	2022
ED3040_20171011_oligo_Nuc_rDNA_006	6	32	14	181	687	2260	937	2	1	23	539	143.59	781	0.4286	790	1913
ED3040_20171011_oligo_Nuc_rDNA_006	6	32	14	181	687	2260	937	2	2	24	491	131.79	780	0.7143	802	1906
ED3040_20171011_oligo_Nuc_rDNA_006	6	32	15	182	496	2330	1063.5	2	1	16	418	115.43	628	0.6667	806	1371
ED3040_20171011_oligo_Nuc_rDNA_006	6	32	15	182	496	2330	1063.5	2	2	20	415	102.75	603	0.25	806	1377
ED3040_20171011_oligo_Nuc_rDNA_006	6	32	16	183	878	2360	1284.8	2	1	19	427	122.09	667	0.4375	867	1648
ED3040_20171011_oligo_Nuc_rDNA_006	6	32	16	183	878	2360	1284.8	2	2	21	425	118.26	636	0.75	870	1634
ED3040_20171011_oligo_Nuc_rDNA_006	6	32	17	184	690	2420	1249.8	1	1	28	567	162.78	820	0.5	991	917
ED3040_20171011_oligo_Nuc_rDNA_006	6	32	18	185	555	2340	1067.6	1	1	23	447	122.08	692	0.7692	1089	1472
ED3040_20171011_oligo_Nuc_rDNA_006	6	32	19	186	503	2410	1125.8	2	1	18	483	131.27	692	0.5833	1087	1654
ED3040_20171011_oligo_Nuc_rDNA_006	6	32	19	186	503	2410	1125.8	2	2	21	467	137.5	751	0.9167	1093	1650
ED3040_20171011_oligo_Nuc_rDNA_006	6	32	20	187	514	2250	951.4	2	1	21	544	174.73	858	0.6667	1114	503
ED3040_20171011_oligo_Nuc_rDNA_006	6	32	20	187	514	2250	951.4	2	2	21	484	144.03	778	0.5833	1116	494
ED3040_20171011_oligo_Nuc_rDNA_006	6	32	21	188	517	2370	1270.5	2	1	22	479	151.97	744	0.5385	1122	403
ED3040_20171011_oligo_Nuc_rDNA_006	6	32	21	188	517	2370	1270.5	2	2	23	526	136.81	820	0.6923	1124	413
ED3040_20171011_oligo_Nuc_rDNA_006	6	32	22	189	543	2110	677.9	2	1	21	440	109.54	663	0.25	1203	1356
ED3040_20171011_oligo_Nuc_rDNA_006	6	32	22	189	543	2110	677.9	2	2	25	496	153.52	843	0.3333	1217	1345
ED3040_20171011_oligo_Nuc_rDNA_006	6	32	23	190	590	2390	1195.7	2	1	23	444	102.15	639	0.6923	1261	1247
ED3040_20171011_oligo_Nuc_rDNA_006	6	32	23	190	590	2390	1195.7	2	2	22	520	155.2	815	0.3846	1267	1235
ED3040_20171011_oligo_Nuc_rDNA_006	6	32	24	191	723	2210	1222.3	2	1	20	395	76.13	562	0.3571	1377	947
ED3040_20171011_oligo_Nuc_rDNA_006	6	32	24	191	723	2210	1222.3	2	2	19	471	117.03	681	0.8571	1386	942
ED3040_20171011_oligo_Nuc_rDNA_006	6	32	25	192	710	2280	936.7	2	1	24	415	99.72	586	0.4286	1544	1843
ED3040_20171011_oligo_Nuc_rDNA_006	6	32	25	192	710	2280	936.7	2	2	20	407	105.61	661	0.5	1545	1855
ED3040_20171011_oligo_Nuc_rDNA_006	6	32	26	193	521	2310	1123.1	1	1	26	454	101.45	662	0.8333	1564	364
ED3040_20171011_oligo_Nuc_rDNA_006	6	32	27	194	536	2220	837.6	1	1	25	712	224.1	1147	0.5385	1579	1573
ED3040_20171011_oligo_Nuc_rDNA_006	6	32	28	195	478	2100	800	2	1	19	349	72.9	482	0.25	1579	104
ED3040_20171011_oligo_Nuc_rDNA_006	6	32	28	195	478	2100	800	2	2	22	334	67.63	439	0.4167	1587	103
ED3040_20171011_oligo_Nuc_rDNA_006	6	32	30	197	556	2140	738.2	2	1	22	411	95.31	556	0.3846	1847	768
ED3040_20171011_oligo_Nuc_rDNA_006	6	32	30	197	556	2140	738.2	2	2	23	464	124.75	696	0.1538	1851	778
ED3040_20171011_oligo_Nuc_rDNA_007	7	50	1	200	892	2330	1204.5	2	1	25	733	267.8	1193	0.5625	42	729
ED3040_20171011_oligo_Nuc_rDNA_007	7	50	1	200	892	2330	1204.5	2	2	25	678	215.57	1036	0.5	50	744
ED3040_20171011_oligo_Nuc_rDNA_007	7	50	2	201	311	1660	388.1	1	1	25	409	108.5	615	0.4444	41	111
ED3040_20171011_oligo_Nuc_rDNA_007	7	50	4	203	629	2250	886.4	2	1	24	457	109.14	677	0.4615	104	1439
ED3040_20171011_oligo_Nuc_rDNA_007	7	50	4	203	629	2250	886.4	2	2	22	442	112	635	0.3077	113	1426
ED3040_20171011_oligo_Nuc_rDNA_007	7	50	5	204	866	2360	1169	2	1	24	691	226.17	1105	0.3125	148	469
ED3040_20171011_oligo_Nuc_rDNA_007	7	50	5	204	866	2360	1169	2	2	25	683	266.65	1227	0.4375	149	449
ED3040_20171011_oligo_Nuc_rDNA_007	7	50	6	205	495	2190	833.1	1	1	26	530	134.6	800	0.4167	189	1376
ED3040_20171011_oligo_Nuc_rDNA_007	7	50	7	206	499	2210	783.3	1	1	28	604	168.87	999	0.4167	210	1287
ED3040_20171011_oligo_Nuc_rDNA_007	7	50	8	207	538	2050	663.5	2	1	24	526	142.05	798	0.3333	214	1667
ED3040_20171011_oligo_Nuc_rDNA_007	7	50	8	207	538	2050	663.5	2	2	21	445	131.94	700	0.75	215	1656
ED3040_20171011_oligo_Nuc_rDNA_007	7	50	9	208	413	2130	737.5	2	1	26	458	138.57	763	0.6364	214	362
ED3040_20171011_oligo_Nuc_rDNA_007	7	50	9	208	413	2130	737.5	2	2	20	424	116.31	632	0.2727	216	374
ED3040_20171011_oligo_Nuc_rDNA_007	7	50	10	209	450	2060	688.8	2	1	21	329	77.41	495	0.6364	246	273
ED3040_20171011_oligo_Nuc_rDNA_007	7	50	10	209	450	2060	688.8	2	2	21	352	93.14	531	0.3636	252	286
ED3040_20171011_oligo_Nuc_rDNA_007	7	50	11	210	677	2170	758.6	2	1	24	514	95.6	686	0.3571	271	748
ED3040_20171011_oligo_Nuc_rDNA_007	7	50	11	210	677	2170	758.6	2	2	21	523	124.57	816	0.8571	271	739
ED3040_20171011_oligo_Nuc_rDNA_007	7	50	12	211	734	2040	709.4	2	1	23	500	106.63	697	0.8571	330	1649
ED3040_20171011_oligo_Nuc_rDNA_007	7	50	12	211	734	2040	709.4	2	2	23	509	103.41	663	0.4286	333	1661
ED3040_20171011_oligo_Nuc_rDNA_007	7	50	15	214	530	2260	937.7	1	1	30	442	97.37	668	0.9167	383	1279
ED3040_20171011_oligo_Nuc_rDNA_007	7	50	16	215	699	2140	1155.5	2	1	23	516	142	786	0.7857	383	1602
ED3040_20171011_oligo_Nuc_rDNA_007	7	50	16	215	699	2140	1155.5	2	2	19	411	80.48	568	0.5	394	1599
ED3040_20171011_oligo_Nuc_rDNA_007	7	50	20	219	423	2240	844.1	2	1	19	476	87.66	644	0.5455	472	1632
ED3040_20171011_oligo_Nuc_rDNA_007	7	50	20	219	423	2240	844.1	2	2	20	410	62.62	518	0.5455	475	1621
ED3040_20171011_oligo_Nuc_rDNA_007	7	50	21	220	577	2100	910.1	1	1	25	508	119.69	730	0.4167	588	1731
ED3040_20171011_oligo_Nuc_rDNA_007	7	50	22	221	858	2420	1076.8	1	1	29	862	263.15	1356	0.5	629	274
ED3040_20171011_oligo_Nuc_rDNA_007	7	50	24	223	767	2400	1252.6	2	1	19	465	124.96	733	0.4	679	345
ED3040_20171011_oligo_Nuc_rDNA_007	7	50	24	223	767	2400	1252.6	2	2	23	504	152.26	822	0.5333	679	338
ED3040_20171011_oligo_Nuc_rDNA_007	7	50	25	224	476	2330	1002.1	1	1	36	394	89.53	637	0.8333	759	1905
ED3040_20171011_oligo_Nuc_rDNA_007	7	50	26	225	553	2330	778.5	2	1	21	533	146.61	822	0.6154	815	564
ED3040_20171011_oligo_Nuc_rDNA_007	7	50	26	225	553	2330	778.5	2	2	21	531	166.34	861	0.6923	818	555
ED3040_20171011_oligo_Nuc_rDNA_007	7	50	27	226	583	2360	983.8	2	1	21	544	149.56	826	0.5385	866	1207
ED3040_20171011_oligo_Nuc_rDNA_007	7	50	27	226	583	2360	983.8	2	2	21	531	151.71	870	0.5385	874	1203
ED3040_20171011_oligo_Nuc_rDNA_007	7	50	29	228	487	2440	1131.1	2	1	18	449	128.66	662	0.5833	967	1526
ED3040_20171011_oligo_Nuc_rDNA_007	7	50	29	228	487	2440	1131.1	2	2	20	460	113.99	669	0.5	973	1529
ED3040_20171011_oligo_Nuc_rDNA_007	7	50	30	229	418	2100	864.2	2	1	21	374	74.96	550	0.5455	1022	50
ED3040_20171011_oligo_Nuc_rDNA_007	7	50	30	229	418	2100	864.2	2	2	19	387	74.58	541	0.3636	1030	61
ED3040_20171011_oligo_Nuc_rDNA_007	7	50	31	230	514	2430	1256.9	2	1	17	437	106.64	644	0.8333	1063	1130
ED3040_20171011_oligo_Nuc_rDNA_007	7	50	31	230	514	2430	1256.9	2	2	21	479	150.56	761	0.75	1064	1123
ED3040_20171011_oligo_Nuc_rDNA_007	7	50	32	231	661	2370	980.6	2	1	22	560	157.69	818	0.5714	1071	1776
ED3040_20171011_oligo_Nuc_rDNA_007	7	50	32	231	661	2370	980.6	2	2	22	541	146	809	0.7857	1076	1771
ED3040_20171011_oligo_Nuc_rDNA_007	7	50	33	232	527	2390	1024.5	1	1	42	626	168.38	1078	0.5385	1123	1456
ED3040_20171011_oligo_Nuc_rDNA_007	7	50	34	233	433	2120	708.3	1	1	34	538	140.61	831	0.5455	1159	12
ED3040_20171011_oligo_Nuc_rDNA_007	7	50	35	234	497	2450	1150.3	2	1	21	526	146.7	833	0.3333	1172	772
ED3040_20171011_oligo_Nuc_rDNA_007	7	50	35	234	497	2450	1150.3	2	2	25	441	96.88	651	0.5833	1182	764
ED3040_20171011_oligo_Nuc_rDNA_007	7	50	36	235	834	2410	1261.3	2	1	22	430	124.25	716	0.625	1259	725
ED3040_20171011_oligo_Nuc_rDNA_007	7	50	36	235	834	2410	1261.3	2	2	20	465	123.64	746	0.5	1268	724
ED3040_20171011_oligo_Nuc_rDNA_007	7	50	37	236	569	2380	1251.3	2	1	20	388	77.08	554	0.4615	1275	1725
ED3040_20171011_oligo_Nuc_rDNA_007	7	50	37	236	569	2380	1251.3	2	2	18	379	79.27	521	0.7692	1281	1723
ED3040_20171011_oligo_Nuc_rDNA_007	7	50	38	237	463	2170	796	2	1	18	442	127.29	706	0.8182	1322	97
ED3040_20171011_oligo_Nuc_rDNA_007	7	50	38	237	463	2170	796	2	2	20	488	138.58	716	0.6364	1328	94
ED3040_20171011_oligo_Nuc_rDNA_007	7	50	39	238	347	1240	239.1	0	NaN	NaN	NaN	NaN	NaN	NaN	NaN	NaN
ED3040_20171011_oligo_Nuc_rDNA_007	7	50	43	242	519	2290	1045.6	1	1	24	492	161.41	830	0.4167	1623	605
ED3040_20171011_oligo_Nuc_rDNA_007	7	50	44	243	560	2180	986.9	2	1	22	547	169.62	840	0.2308	1637	659
ED3040_20171011_oligo_Nuc_rDNA_007	7	50	44	243	560	2180	986.9	2	2	23	481	128.55	784	0.7692	1645	655
ED3040_20171011_oligo_Nuc_rDNA_007	7	50	47	246	536	2290	990	2	1	20	531	146.07	791	0.4615	1890	1111
ED3040_20171011_oligo_Nuc_rDNA_007	7	50	47	246	536	2290	990	2	2	24	653	218.13	1041	0.6154	1893	1104
ED3040_20171011_oligo_Nuc_rDNA_007	7	50	50	249	330	1340	326.6	0	NaN	NaN	NaN	NaN	NaN	NaN	NaN	NaN
ED3040_20171011_oligo_Nuc_rDNA_008	8	39	1	250	446	2200	1087	2	1	15	329	78.24	530	0.7273	245	1975
ED3040_20171011_oligo_Nuc_rDNA_008	8	39	1	250	446	2200	1087	2	2	19	376	55.62	459	0.6364	246	1984
ED3040_20171011_oligo_Nuc_rDNA_008	8	39	3	252	852	2370	1259.2	1	1	27	675	200.15	1046	0.75	297	480
ED3040_20171011_oligo_Nuc_rDNA_008	8	39	5	254	445	2210	1020.9	2	1	16	326	37.08	407	0.3636	483	1946
ED3040_20171011_oligo_Nuc_rDNA_008	8	39	5	254	445	2210	1020.9	2	2	18	406	95.19	565	0.6364	495	1952
ED3040_20171011_oligo_Nuc_rDNA_008	8	39	8	257	626	2290	1076	2	1	21	615	203.1	983	0.3077	654	1542
ED3040_20171011_oligo_Nuc_rDNA_008	8	39	8	257	626	2290	1076	2	2	21	586	169.76	958	0.9231	662	1537
ED3040_20171011_oligo_Nuc_rDNA_008	8	39	9	258	487	2250	1165.1	2	1	15	463	119.28	682	1	669	865
ED3040_20171011_oligo_Nuc_rDNA_008	8	39	9	258	487	2250	1165.1	2	2	19	494	101.95	705	0.4167	676	866
ED3040_20171011_oligo_Nuc_rDNA_008	8	39	11	260	573	2240	840.9	2	1	17	526	142.61	746	0.3846	703	580
ED3040_20171011_oligo_Nuc_rDNA_008	8	39	11	260	573	2240	840.9	2	2	20	521	128.01	759	0.4615	703	591
ED3040_20171011_oligo_Nuc_rDNA_008	8	39	12	261	524	1870	490.7	2	1	20	465	107.76	643	0.2308	708	106
ED3040_20171011_oligo_Nuc_rDNA_008	8	39	12	261	524	1870	490.7	2	2	18	472	122.59	664	0.2308	714	114
ED3040_20171011_oligo_Nuc_rDNA_008	8	39	13	262	684	2230	1091.3	1	1	31	714	169.17	1026	0.5	724	885
ED3040_20171011_oligo_Nuc_rDNA_008	8	39	15	264	455	2210	861.4	1	1	38	491	130.27	789	0.5	805	116
ED3040_20171011_oligo_Nuc_rDNA_008	8	39	16	265	635	2000	1017.6	1	1	22	741	239.64	1188	0.4286	833	927
ED3040_20171011_oligo_Nuc_rDNA_008	8	39	17	266	552	2230	824.6	1	1	23	821	307.2	1396	0.5833	926	988
ED3040_20171011_oligo_Nuc_rDNA_008	8	39	18	267	451	2240	940.4	2	1	19	488	144.98	809	0.3636	975	271
ED3040_20171011_oligo_Nuc_rDNA_008	8	39	18	267	451	2240	940.4	2	2	21	503	151.42	801	0.4545	982	262
ED3040_20171011_oligo_Nuc_rDNA_008	8	39	19	268	469	2210	887.1	1	1	24	751	295.44	1401	0.5455	1030	255
ED3040_20171011_oligo_Nuc_rDNA_008	8	39	20	269	573	2150	857	1	1	35	660	151.59	968	0.6154	1045	1039
ED3040_20171011_oligo_Nuc_rDNA_008	8	39	23	272	853	2410	1258.3	2	1	22	560	143.5	801	0.625	1243	1822
ED3040_20171011_oligo_Nuc_rDNA_008	8	39	23	272	853	2410	1258.3	2	2	22	517	133.44	826	0.6875	1244	1832
ED3040_20171011_oligo_Nuc_rDNA_008	8	39	24	273	531	2270	915.3	1	1	23	598	175.02	903	0.9231	1426	567
ED3040_20171011_oligo_Nuc_rDNA_008	8	39	25	274	499	2380	1274.3	1	1	32	601	185.97	1078	0.5833	1427	1012
ED3040_20171011_oligo_Nuc_rDNA_008	8	39	26	275	674	2330	1060.5	2	1	17	453	92.12	615	0.5714	1519	942
ED3040_20171011_oligo_Nuc_rDNA_008	8	39	26	275	674	2330	1060.5	2	2	20	417	87.7	588	0.7857	1526	948
ED3040_20171011_oligo_Nuc_rDNA_008	8	39	27	276	469	2100	806.6	2	1	17	404	92.33	561	0.5455	1566	34
ED3040_20171011_oligo_Nuc_rDNA_008	8	39	27	276	469	2100	806.6	2	2	19	421	102.96	619	0.3636	1568	46
ED3040_20171011_oligo_Nuc_rDNA_008	8	39	28	277	729	2370	1148.8	1	1	31	657	163.46	895	0.4	1614	1047
ED3040_20171011_oligo_Nuc_rDNA_008	8	39	31	280	510	2370	1162.7	1	1	35	585	147.07	858	0.5833	1633	1619
ED3040_20171011_oligo_Nuc_rDNA_008	8	39	33	282	851	2180	864.3	1	1	42	658	177.83	1128	0.8667	1798	26
ED3040_20171011_oligo_Nuc_rDNA_008	8	39	34	283	467	2150	836.4	1	1	31	500	103.99	651	0.5	1791	278
ED3040_20171011_oligo_Nuc_rDNA_008	8	39	36	285	678	2340	1168.1	2	1	19	481	113.7	717	0.5714	1927	1956
ED3040_20171011_oligo_Nuc_rDNA_008	8	39	36	285	678	2340	1168.1	2	2	18	444	109.76	667	0.4286	1935	1949
ED3040_20171011_oligo_Nuc_rDNA_008	8	39	37	286	493	2230	1048.5	1	1	23	666	220.92	1114	0.6364	2002	1455
ED3040_20171011_oligo_Nuc_rDNA_008	8	39	38	287	661	2250	1134.5	2	1	17	426	126	652	0.4286	2009	287
ED3040_20171011_oligo_Nuc_rDNA_008	8	39	38	287	661	2250	1134.5	2	2	21	495	133.05	723	0.5	2015	281
ED3040_20171011_oligo_Nuc_rDNA_008	8	39	39	288	393	1800	536.8	2	1	15	453	95.45	590	0.7	2011	61
ED3040_20171011_oligo_Nuc_rDNA_008	8	39	39	288	393	1800	536.8	2	2	15	481	120.38	707	0.2	2012	66

## Sheet: ED3042_Rep1
DatasetName	ImageIndex	TotalCellCount	CellIndex	GlobalCellIndex	NuclearSize	AvgNuclearIntensity	std_NuclearIntensity	Cy5_NumSpotsPerCell	Cy5_SpotIndex	Cy5_SpotSize	Cy5_MeanSpotIntensity	Cy5_std_SpotIntensity	Cy5_MaxSpotIntensity	Cy5_SpotRRD	Cy5_Spot_centroidX	Cy5_Spot_centroidY
1	1	31	1	1	890	493.189	191.4	2	1	30	1366	449.11	2324	0.75	18	174
1	1	31	1	1	890	493.189	191.4	2	2	31	1377	448.79	2411	0.4375	29	182
1	1	31	2	2	1110	536.749	250.9	2	1	39	1857	672.12	3265	0.5	46	2020
1	1	31	2	2	1110	536.749	250.9	2	2	34	1704	599.67	3069	0.6111	56	2033
1	1	31	3	3	1385	489.946	194.2	3	1	49	1498	378.64	2395	0.75	70	1787
1	1	31	3	3	1385	489.946	194.2	3	2	23	1307	302.85	1867	0.625	74	1777
1	1	31	3	3	1385	489.946	194.2	3	3	30	1484	514.31	2675	0.5625	86	1775
1	1	31	4	4	679	488.047	208.4	1	1	36	1804	717.72	3391	0.7143	93	496
1	1	31	5	5	749	522.336	275	2	1	34	1398	594.92	2808	0.6667	455	781
1	1	31	5	5	749	522.336	275	2	2	26	1186	395.24	1967	0.5333	461	792
1	1	31	6	6	746	506.015	243.1	2	1	30	1503	565.64	2664	0.5333	503	1496
1	1	31	6	6	746	506.015	243.1	2	2	30	1344	427.26	2203	0.6	509	1485
1	1	31	7	7	757	517.89	262.2	2	1	34	1577	577.48	2773	0.6667	567	1174
1	1	31	7	7	757	517.89	262.2	2	2	34	1599	691.5	3269	0.4667	580	1171
1	1	31	8	8	772	513.596	247.5	1	1	37	2167	1010.08	4095	0.5333	599	754
1	1	31	9	9	1386	570.905	303.9	3	1	45	1385	275.88	2083	0.7222	686	1564
1	1	31	9	9	1386	570.905	303.9	3	2	23	1475	351.48	2235	0.6667	685	1584
1	1	31	9	9	1386	570.905	303.9	3	3	25	1537	496.67	2649	1	687	1577
1	1	31	10	10	1469	563.475	292.5	3	1	41	1556	399.06	2351	0.7222	776	357
1	1	31	10	10	1469	563.475	292.5	3	2	29	1374	393.36	2209	0.6667	789	346
1	1	31	10	10	1469	563.475	292.5	3	3	32	1299	354.65	2041	0.4444	801	350
1	1	31	11	11	716	506.522	260.4	2	1	30	1437	588.65	2651	0.4	799	927
1	1	31	11	11	716	506.522	260.4	2	2	32	1530	648.88	3035	0.5333	806	912
1	1	31	12	12	1004	546.407	293.1	2	1	35	1735	826.3	3580	0.7059	814	970
1	1	31	12	12	1004	546.407	293.1	2	2	32	1459	558.39	2819	0.5882	825	961
1	1	31	13	13	816	508.821	232.3	2	1	26	1673	628.87	2935	0.5	865	1271
1	1	31	13	13	816	508.821	232.3	2	2	29	1706	686.59	3203	0.6875	871	1266
1	1	31	14	14	761	523.227	271.2	1	1	39	1423	465.19	2529	1	918	215
1	1	31	15	15	813	543.793	313	2	1	31	1557	621.5	3047	0.5	968	1601
1	1	31	15	15	813	543.793	313	2	2	34	1584	688.83	3162	0.8125	971	1590
1	1	31	16	16	796	522.322	268.9	1	1	37	2260	976.12	4095	0.8125	992	1249
1	1	31	17	17	793	505.918	226.1	1	1	56	1746	582.22	3045	0.8667	1125	383
1	1	31	18	18	1745	505.87	202.3	4	1	32	1553	584.15	3006	0.5	1171	1772
1	1	31	18	18	1745	505.87	202.3	4	2	31	1452	543.11	2648	0.5	1177	1759
1	1	31	18	18	1745	505.87	202.3	4	3	54	1537	319.07	2203	0.9444	1181	1789
1	1	31	18	18	1745	505.87	202.3	4	4	16	1025	125.87	1314	0.4444	1187	1799
1	1	31	19	19	791	506.545	238.8	1	1	38	2160	937.73	4095	0.4	1230	1811
1	1	31	20	20	1160	569.509	306.1	2	1	28	1670	610.04	3072	0.6316	1382	1825
1	1	31	20	20	1160	569.509	306.1	2	2	31	1740	578.2	3122	0.8947	1388	1832
1	1	31	21	21	772	535.444	301.6	2	1	32	1639	765.04	3384	0.7333	1425	655
1	1	31	21	21	772	535.444	301.6	2	2	31	1612	608.47	2889	0.6	1427	665
1	1	31	22	22	833	508.742	233.9	1	1	36	1714	708.84	3384	0.6875	1446	301
1	1	31	23	23	802	526.923	282.5	1	1	39	1685	583.9	3024	0.8125	1492	545
1	1	31	24	24	744	518.634	272.5	2	1	29	1341	545.18	2654	0.3333	1491	902
1	1	31	24	24	744	518.634	272.5	2	2	30	1350	534.31	2667	0.9333	1500	895
1	1	31	25	25	760	510.009	250.3	2	1	35	1966	847.62	3844	0.6429	1527	650
1	1	31	25	25	760	510.009	250.3	2	2	35	1997	899.38	3941	0.6429	1528	640
1	1	31	26	26	760	497.435	214.9	2	1	31	1430	475.42	2514	0.4667	1563	1952
1	1	31	26	26	760	497.435	214.9	2	2	29	1380	403.86	2285	0.6	1578	1945
1	1	31	27	27	838	524.825	259.9	2	1	32	1452	633.42	2870	0.5333	1637	947
1	1	31	27	27	838	524.825	259.9	2	2	33	1651	719.14	3386	0.7333	1647	957
1	1	31	28	28	753	504.874	232.5	1	1	36	2254	731.91	4005	0.6667	1695	1109
1	1	31	29	29	682	493.909	225.7	2	1	21	1059	391.47	1878	0.5	1916	109
1	1	31	29	29	682	493.909	225.7	2	2	25	1268	378.59	2128	0.7857	1921	116
1	1	31	30	30	730	505.211	233.7	1	1	35	1871	777.04	3785	0.7333	1976	359
1	1	31	31	31	784	492.255	204.1	1	1	53	1965	607.45	3593	0.7333	1983	1587
2	2	34	1	32	646	555.882	249.5	1	1	40	1265	404.97	2258	0.7143	74	470
2	2	34	2	33	703	555.693	251.3	1	1	41	1554	575.05	2763	0.5714	223	1721
2	2	34	3	34	1626	607.936	285	2	1	55	1339	421.47	2370	0.8333	241	1400
2	2	34	3	34	1626	607.936	285	2	2	42	1674	708.89	3377	0.7222	257	1410
2	2	34	4	35	653	535.862	224.8	1	1	39	1349	547.69	2567	0.5	265	166
2	2	34	5	36	688	517.44	198.9	2	1	31	983	311.61	1748	0.3571	281	125
2	2	34	5	36	688	517.44	198.9	2	2	34	1029	357.83	1850	0.6429	283	110
2	2	34	6	37	731	544.878	222.9	2	1	36	1146	414.77	2069	0.7333	322	102
2	2	34	6	37	731	544.878	222.9	2	2	33	1023	304.21	1685	0.5333	333	100
2	2	34	7	38	764	559.687	245	1	1	42	1945	823.02	4086	0.7333	353	833
2	2	34	8	39	751	554.23	233.8	2	1	37	1115	395.78	1995	0.4667	351	1439
2	2	34	8	39	751	554.23	233.8	2	2	37	1241	407.09	2257	0.4667	354	1454
2	2	34	9	40	739	582.445	313.2	2	1	36	1059	420.77	2078	0.5333	371	1029
2	2	34	9	40	739	582.445	313.2	2	2	35	1049	388.75	2018	0.5333	376	1015
2	2	34	10	41	899	605.518	319.2	1	1	52	1512	444.58	2474	0.9412	374	601
2	2	34	11	42	1186	658.131	382.9	2	1	40	1777	747.83	3628	0.5789	398	1653
2	2	34	11	42	1186	658.131	382.9	2	2	36	1236	443.65	2313	0.5263	398	1671
2	2	34	12	43	1741	622.62	265.9	2	1	37	1667	682.54	3233	0.6957	439	1133
2	2	34	12	43	1741	622.62	265.9	2	2	40	1871	912.25	4095	0.3913	448	1118
2	2	34	13	44	705	574.091	283.6	2	1	32	1011	352.73	1955	0.5	511	338
2	2	34	13	44	705	574.091	283.6	2	2	36	1117	458.88	2130	0.6429	523	329
2	2	34	14	45	703	578.302	304.5	2	1	36	1012	344.04	1868	0.5333	523	1945
2	2	34	14	45	703	578.302	304.5	2	2	34	1130	385.01	2121	0.5333	537	1945
2	2	34	15	46	1256	644.964	342.1	1	1	43	1737	522.77	2906	0.8421	552	1092
2	2	34	16	47	765	561.417	256.8	2	1	36	1201	435.46	2158	0.4	558	1824
2	2	34	16	47	765	561.417	256.8	2	2	36	1095	382.26	2121	0.5333	569	1833
2	2	34	17	48	768	585.542	307.7	1	1	40	1827	761.43	3485	0.7333	690	494
2	2	34	18	49	877	550.515	208.8	2	1	36	1121	333.12	1849	0.5	778	597
2	2	34	18	49	877	550.515	208.8	2	2	34	1151	356.46	2122	0.3125	781	614
2	2	34	19	50	1104	772.981	753.7	1	1	93	1888	245.41	2295	0.9444	790	359
2	2	34	20	51	818	566.186	264.4	1	1	46	1827	636.04	3012	0.625	935	1135
2	2	34	21	52	742	556.284	246.1	1	1	49	1946	621.26	3093	0.7333	983	936
2	2	34	22	53	787	552.555	234.4	1	1	52	1266	322.22	1955	0.7333	992	426
2	2	34	23	54	773	582.838	299.6	2	1	29	1176	408.36	2066	0.6667	1142	1593
2	2	34	23	54	773	582.838	299.6	2	2	34	1457	572.08	2837	0.8	1149	1597
2	2	34	24	55	723	558.86	249.9	1	1	41	1648	605.98	2924	0.5333	1162	1974
2	2	34	25	56	749	554.521	245.8	2	1	36	1572	643.24	3116	0.4	1190	1807
2	2	34	25	56	749	554.521	245.8	2	2	39	1542	648.65	3394	0.6	1203	1812
2	2	34	26	57	1354	684.819	400.6	3	1	30	1268	395.71	2151	0.7368	1276	1136
2	2	34	26	57	1354	684.819	400.6	3	2	32	1454	508.74	2671	0.5263	1277	1145
2	2	34	26	57	1354	684.819	400.6	3	3	46	1442	466.48	2366	0.7368	1282	1126
2	2	34	27	58	1393	692.412	407.9	2	1	40	1584	434.98	2346	0.65	1415	1124
2	2	34	27	58	1393	692.412	407.9	2	2	48	1971	707.97	3672	0.65	1425	1117
2	2	34	28	59	808	528.166	182.8	2	1	31	1497	463.71	2578	0.4375	1481	1520
2	2	34	28	59	808	528.166	182.8	2	2	32	1567	496.14	2680	0.5	1486	1515
2	2	34	29	60	1347	606.403	257.9	2	1	40	1845	610.92	3236	0.65	1483	767
2	2	34	29	60	1347	606.403	257.9	2	2	39	1684	638.92	3009	0.4	1489	748
2	2	34	30	61	714	571.591	288.5	1	1	44	1695	595.73	3125	0.7333	1574	1868
2	2	34	31	62	958	571.232	239.4	1	1	44	1839	694.02	3346	0.4118	1642	720
2	2	34	32	63	1844	715.888	393.4	3	1	56	2404	808.19	4095	0.619	1805	1635
2	2	34	32	63	1844	715.888	393.4	3	2	32	1238	387.44	2113	0.619	1808	1612
2	2	34	32	63	1844	715.888	393.4	3	3	33	1130	115.69	1340	0.7619	1815	1618
2	2	34	33	64	728	562.702	254.7	1	1	45	1520	485.3	2534	0.7333	1946	1593
2	2	34	34	65	797	581.13	290.3	1	1	40	1738	777.43	3537	0.5625	1996	1111
3	3	114	1	66	1282	633.628	185.7	2	1	27	2007	654.65	3595	0.5	27	1710
3	3	114	1	66	1282	633.628	185.7	2	2	13	1327	203.11	1590	0.0714	27	1726
3	3	114	2	67	2513	858.744	300.9	8	1	20	1005	240.66	1450	0.3182	35	294
3	3	114	2	67	2513	858.744	300.9	8	2	35	1014	210.89	1473	0.5909	43	279
3	3	114	2	67	2513	858.744	300.9	8	3	19	1004	245.02	1519	0.5909	44	292
3	3	114	2	67	2513	858.744	300.9	8	4	18	961	239.85	1355	0.4091	49	300
3	3	114	2	67	2513	858.744	300.9	8	5	19	951	236.94	1352	0.2273	52	264
3	3	114	2	67	2513	858.744	300.9	8	6	20	947	209.45	1338	0.8182	57	293
3	3	114	2	67	2513	858.744	300.9	8	7	17	900	135.21	1146	0.5909	57	270
3	3	114	2	67	2513	858.744	300.9	8	8	33	1880	466.75	2596	0.5	70	306
3	3	114	3	68	931	874.474	452.8	1	1	39	2017	424.93	2852	0.8667	59	717
3	3	114	4	69	1726	703.372	210.7	7	1	18	912	199.79	1256	0.05	45	208
3	3	114	4	69	1726	703.372	210.7	7	2	34	1120	208.04	1483	0.35	56	182
3	3	114	4	69	1726	703.372	210.7	7	3	26	774	83.18	963	0.3	57	215
3	3	114	4	69	1726	703.372	210.7	7	4	19	940	165.45	1247	0.95	69	196
3	3	114	4	69	1726	703.372	210.7	7	5	18	850	144.28	1090	0.65	75	190
3	3	114	4	69	1726	703.372	210.7	7	6	12	968	188.02	1316	0.7	76	197
3	3	114	4	69	1726	703.372	210.7	7	7	18	970	204.07	1437	0.3	84	197
3	3	114	5	70	1478	801.229	271.1	6	1	21	1087	223.79	1478	0.3529	58	461
3	3	114	5	70	1478	801.229	271.1	6	2	25	1304	352.64	1975	0.7647	60	473
3	3	114	5	70	1478	801.229	271.1	6	3	21	1348	369.43	2085	0.1765	64	492
3	3	114	5	70	1478	801.229	271.1	6	4	18	1009	212.66	1336	0.7647	70	470
3	3	114	5	70	1478	801.229	271.1	6	5	18	977	221.07	1365	0.5882	75	479
3	3	114	5	70	1478	801.229	271.1	6	6	16	1297	419.67	1970	0.1176	85	500
3	3	114	6	71	610	749.554	259.8	2	1	22	1353	406.34	2046	0.3846	97	1422
3	3	114	6	71	610	749.554	259.8	2	2	25	1221	308.84	1752	0.3846	107	1419
3	3	114	7	72	665	748.319	182.4	2	1	22	1364	419.09	2135	0.6429	98	1102
3	3	114	7	72	665	748.319	182.4	2	2	25	1496	457.97	2409	0.5	105	1108
3	3	114	8	73	1273	658.957	120.5	3	1	22	857	165.36	1156	0.6	99	562
3	3	114	8	73	1273	658.957	120.5	3	2	22	843	117.13	1063	0.9333	108	568
3	3	114	8	73	1273	658.957	120.5	3	3	22	1031	215.76	1362	0.4667	122	582
3	3	114	9	74	662	721.923	229.3	2	1	22	1233	366.43	1946	0.5	103	1501
3	3	114	9	74	662	721.923	229.3	2	2	22	1270	438.48	2117	0.3571	107	1487
3	3	114	10	75	628	742.014	275.5	1	1	25	1740	519.48	2814	0.6429	152	1203
3	3	114	11	76	675	774.898	366.1	2	1	21	1376	333.01	2043	0.4286	156	1486
3	3	114	11	76	675	774.898	366.1	2	2	22	1422	493.93	2486	0.5714	161	1471
3	3	114	12	77	892	855.177	367.9	2	1	21	1244	307.55	1804	0.5	158	1675
3	3	114	12	77	892	855.177	367.9	2	2	23	1206	311.97	1787	0.5625	167	1675
3	3	114	13	78	729	746.056	264.8	1	1	24	1648	424.75	2605	1	178	1512
3	3	114	14	79	1108	840.864	322.5	1	1	30	2743	788.22	4095	0.5556	197	1140
3	3	114	15	80	2424	974.852	508.2	5	1	15	988	181.88	1284	0.5238	183	1218
3	3	114	15	80	2424	974.852	508.2	5	2	26	1302	287.56	1911	0.7619	189	1221
3	3	114	15	80	2424	974.852	508.2	5	3	20	1271	199.23	1687	0.8095	195	1224
3	3	114	15	80	2424	974.852	508.2	5	4	23	1622	486.16	2504	0.7143	204	1232
3	3	114	15	80	2424	974.852	508.2	5	5	24	1921	548.3	2992	0.9048	212	1232
3	3	114	16	81	955	749.865	272.9	2	1	13	1210	108.3	1397	0.8824	192	1823
3	3	114	16	81	955	749.865	272.9	2	2	17	1198	241.06	1650	0.4118	198	1817
3	3	114	17	82	656	753.413	295.4	1	1	32	1915	572.34	2912	0.6429	210	1337
3	3	114	18	83	631	716.471	161.5	2	1	20	1377	406.39	2112	0.2143	204	1420
3	3	114	18	83	631	716.471	161.5	2	2	24	1298	405.71	2260	0.3571	222	1417
3	3	114	19	84	1290	686.973	263.8	4	1	25	1587	604.3	2849	0.6923	219	642
3	3	114	19	84	1290	686.973	263.8	4	2	24	1360	377.83	2054	0.3077	219	657
3	3	114	19	84	1290	686.973	263.8	4	3	22	1094	290.51	1682	0.7692	233	629
3	3	114	19	84	1290	686.973	263.8	4	4	17	897	215.66	1265	0.5385	242	624
3	3	114	20	85	637	775.928	364.9	1	1	34	1328	275.6	1965	0.8571	231	1301
3	3	114	21	86	788	765.736	228.7	2	1	26	1295	309.6	1883	0.8571	232	356
3	3	114	21	86	788	765.736	228.7	2	2	21	1011	137.29	1318	0.8571	237	363
3	3	114	22	87	1003	840.447	409.9	1	1	42	1368	208.3	1939	0.8824	239	1906
3	3	114	23	88	1050	865.191	440.6	2	1	25	1992	518.96	2909	0.8235	256	1870
3	3	114	23	88	1050	865.191	440.6	2	2	26	1911	551.97	2933	0.6471	266	1863
3	3	114	24	89	639	783.72	359.8	1	1	31	1662	478.45	2663	0.5714	261	1737
3	3	114	25	90	2524	743.672	243.9	6	1	23	1245	343.52	1899	0.7143	289	1621
3	3	114	25	90	2524	743.672	243.9	6	2	20	1388	423.28	2204	0.4762	292	1605
3	3	114	25	90	2524	743.672	243.9	6	3	22	1345	327.08	1954	0.7143	296	1626
3	3	114	25	90	2524	743.672	243.9	6	4	19	1344	316.83	1848	0.7143	299	1605
3	3	114	25	90	2524	743.672	243.9	6	5	28	1574	388.2	2361	0.7619	310	1631
3	3	114	25	90	2524	743.672	243.9	6	6	22	1146	226.81	1588	0.5238	317	1624
3	3	114	26	91	794	794.697	288	2	1	21	1573	420.73	2391	0.1429	284	1131
3	3	114	26	91	794	794.697	288	2	2	21	1650	525.46	2548	0.4286	294	1116
3	3	114	27	92	667	781.604	336.3	1	1	27	1568	453.25	2426	0.6429	299	1756
3	3	114	28	93	677	712.254	177.2	1	1	29	2223	696.73	3582	0.2143	334	1586
3	3	114	29	94	622	758.513	234	2	1	22	1193	294.65	1771	0.3077	335	1932
3	3	114	29	94	622	758.513	234	2	2	21	1389	385.99	2054	0.7692	344	1922
3	3	114	30	95	1280	870.248	385.4	2	1	39	1245	339.14	2089	0.3158	340	835
3	3	114	30	95	1280	870.248	385.4	2	2	27	855	136.86	1091	0.7895	342	825
3	3	114	31	96	962	848.433	357.1	2	1	25	1471	410.46	2247	0.7059	369	1031
3	3	114	31	96	962	848.433	357.1	2	2	25	1213	283.75	1672	0.7647	371	1022
3	3	114	32	97	616	764.549	254.2	1	1	34	1826	567.61	2880	0.7143	386	1278
3	3	114	33	98	753	773.85	287.3	1	1	37	1759	538.38	2904	0.8	399	1376
3	3	114	34	99	648	802.188	317.3	2	1	21	1484	458.79	2352	0.6154	416	1207
3	3	114	34	99	648	802.188	317.3	2	2	24	1280	351.28	1885	0.6154	423	1218
3	3	114	35	100	1041	904.68	474.9	2	1	23	2223	739.75	3619	0.5	433	1316
3	3	114	35	100	1041	904.68	474.9	2	2	24	2326	854.88	4095	0.6111	438	1307
3	3	114	36	101	780	783.933	278.6	1	1	38	1346	332.39	2080	0.5333	439	1568
3	3	114	37	102	1470	855.17	415.1	4	1	20	1553	487.29	2400	0.6875	437	1047
3	3	114	37	102	1470	855.17	415.1	4	2	17	1371	373.56	1986	0.8125	437	1041
3	3	114	37	102	1470	855.17	415.1	4	3	23	1339	421.2	2065	0.75	439	1020
3	3	114	37	102	1470	855.17	415.1	4	4	22	1560	478.98	2614	0.5625	447	1025
3	3	114	38	103	780	702.885	189.1	2	1	23	1365	402.76	2033	0.4	442	699
3	3	114	38	103	780	702.885	189.1	2	2	21	1207	327.39	1741	0.8	447	685
3	3	114	39	104	995	908.216	448.9	1	1	29	2997	937.26	4095	0.5294	456	1389
3	3	114	40	105	2469	879.885	394.2	4	1	20	1023	283.73	1614	0.4545	480	1134
3	3	114	40	105	2469	879.885	394.2	4	2	19	989	260.46	1536	0.5909	496	1132
3	3	114	40	105	2469	879.885	394.2	4	3	22	1440	477.05	2438	0.2727	503	1166
3	3	114	40	105	2469	879.885	394.2	4	4	23	1318	324.05	1929	0.2273	520	1169
3	3	114	41	106	647	784.176	272.7	2	1	23	1513	448.54	2304	0.7857	495	1444
3	3	114	41	106	647	784.176	272.7	2	2	22	1365	364.22	2033	0.3571	499	1436
3	3	114	42	107	1430	778.595	253.9	4	1	21	1223	294.9	1700	0.4444	506	746
3	3	114	42	107	1430	778.595	253.9	4	2	18	1211	259.29	1711	0.9444	518	748
3	3	114	42	107	1430	778.595	253.9	4	3	11	991	127.87	1193	0.7778	521	742
3	3	114	42	107	1430	778.595	253.9	4	4	12	930	70.58	1041	0.7222	528	748
3	3	114	43	108	1067	960.035	572.7	1	1	36	1508	293.47	2139	0.875	512	667
3	3	114	44	109	1156	859.196	385.3	2	1	24	1542	319.42	2020	0.7895	512	1332
3	3	114	44	109	1156	859.196	385.3	2	2	22	1422	369.09	2140	0.5263	523	1338
3	3	114	45	110	638	741.986	249.3	1	1	37	1341	328.02	2119	0.5714	520	1752
3	3	114	46	111	784	833.927	484.2	1	1	25	1072	250.14	1524	0.6	544	1132
3	3	114	47	112	962	714.244	216.3	2	1	26	1571	617.86	2886	0.2667	541	1020
3	3	114	47	112	962	714.244	216.3	2	2	24	1388	452.19	2167	0.7333	551	1030
3	3	114	48	113	860	788.024	262.4	4	1	20	1040	263.8	1600	0.4286	545	102
3	3	114	48	113	860	788.024	262.4	4	2	23	1229	329.4	1896	0.9286	561	99
3	3	114	48	113	860	788.024	262.4	4	3	12	1007	188.57	1228	0.1429	570	89
3	3	114	48	113	860	788.024	262.4	4	4	13	1095	197.55	1431	0.1429	574	96
3	3	114	49	114	767	743.692	265.6	2	1	22	1168	298.19	1761	0.4667	549	1328
3	3	114	49	114	767	743.692	265.6	2	2	24	1290	365.39	1912	0.6	564	1332
3	3	114	50	115	1562	967.869	523.8	3	1	21	1313	327.14	1881	0.9545	573	1276
3	3	114	50	115	1562	967.869	523.8	3	2	27	2379	810.86	3929	0.3182	574	1292
3	3	114	50	115	1562	967.869	523.8	3	3	28	1925	453.87	2674	0.6818	581	1275
3	3	114	51	116	989	900.474	444	2	1	25	1514	461.95	2334	0.4706	567	513
3	3	114	51	116	989	900.474	444	2	2	26	1516	423.41	2345	0.9412	576	508
3	3	114	52	117	1190	783.07	334.3	4	1	23	1225	331.13	2001	0.2857	568	1970
3	3	114	52	117	1190	783.07	334.3	4	2	23	1379	399.89	2072	0.7143	575	1947
3	3	114	52	117	1190	783.07	334.3	4	3	16	780	100.16	928	0.7857	576	1961
3	3	114	52	117	1190	783.07	334.3	4	4	21	1108	261.03	1538	0.7857	578	1938
3	3	114	53	118	1013	898.465	513.4	2	1	22	1659	571.63	2797	0.6111	586	783
3	3	114	53	118	1013	898.465	513.4	2	2	24	1361	425.86	2124	0.7778	590	773
3	3	114	54	119	788	773.987	351.7	2	1	23	1609	458.28	2453	0.9231	588	1139
3	3	114	54	119	788	773.987	351.7	2	2	17	1367	331.93	1994	0.8462	593	1135
3	3	114	55	120	747	777.351	305.6	2	1	27	1378	392.33	2234	0.3571	593	1217
3	3	114	55	120	747	777.351	305.6	2	2	25	1222	318.53	1831	0.7857	607	1207
3	3	114	56	121	865	856.107	432.6	1	1	31	2043	616.28	3114	0.625	610	1045
3	3	114	57	122	719	758.524	314.3	2	1	22	1065	190.47	1455	0.2857	621	1119
3	3	114	57	122	719	758.524	314.3	2	2	22	1095	196.83	1516	0.8571	632	1108
3	3	114	58	123	775	683.743	157.1	2	1	23	1130	197.7	1479	0.5333	638	1070
3	3	114	58	123	775	683.743	157.1	2	2	24	1224	168.41	1565	0.8667	643	1078
3	3	114	59	124	718	769.414	263.1	2	1	36	1637	455.4	2675	0.5333	691	1041
3	3	114	59	124	718	769.414	263.1	2	2	13	734	104.54	851	0.2	694	1029
3	3	114	60	125	1245	735.985	188.5	4	1	27	1375	315.88	1878	0.2222	691	761
3	3	114	60	125	1245	735.985	188.5	4	2	26	1056	144.79	1303	0.7222	701	760
3	3	114	60	125	1245	735.985	188.5	4	3	23	1434	458.26	2348	0.2778	706	778
3	3	114	60	125	1245	735.985	188.5	4	4	22	1357	399.34	2260	0.8333	711	765
3	3	114	61	126	621	778.797	307.5	2	1	21	1538	488.41	2403	0.5385	705	946
3	3	114	61	126	621	778.797	307.5	2	2	26	1306	374.88	2026	0.3846	714	933
3	3	114	62	127	939	767.001	240.2	2	1	22	1375	360.57	2063	0.9333	727	1707
3	3	114	62	127	939	767.001	240.2	2	2	10	1543	332.05	2067	0.1333	740	1703
3	3	114	63	128	690	695.049	143.1	2	1	19	1411	392.17	2074	0.1429	723	800
3	3	114	63	128	690	695.049	143.1	2	2	22	1365	352.82	2036	0.4286	736	788
3	3	114	64	129	1258	847.087	360	3	1	20	1396	399.55	2200	0.6875	737	1634
3	3	114	64	129	1258	847.087	360	3	2	25	1861	627.05	3124	0.4375	742	1654
3	3	114	64	129	1258	847.087	360	3	3	19	1247	274.34	1833	0.875	746	1631
3	3	114	65	130	1117	887.157	403.9	2	1	24	1845	623.36	3093	0.5	750	1808
3	3	114	65	130	1117	887.157	403.9	2	2	23	1788	587.92	2874	0.5556	755	1820
3	3	114	66	131	1906	776.35	301.7	5	1	45	2166	535.39	2995	0.619	767	1221
3	3	114	66	131	1906	776.35	301.7	5	2	39	1110	231.23	1523	0.4762	773	1203
3	3	114	66	131	1906	776.35	301.7	5	3	17	1602	396.3	2397	0.9048	775	1214
3	3	114	66	131	1906	776.35	301.7	5	4	14	1240	168.94	1531	0.9048	778	1220
3	3	114	66	131	1906	776.35	301.7	5	5	19	1188	279.66	1622	0.0952	799	1219
3	3	114	67	132	755	736.117	275.8	2	1	27	1878	494.21	2826	0.2857	771	1148
3	3	114	67	132	755	736.117	275.8	2	2	24	1754	580.18	2930	0.8571	778	1160
3	3	114	68	133	607	754.491	264.4	2	1	27	1229	263.97	1712	0.2308	782	1869
3	3	114	68	133	607	754.491	264.4	2	2	25	1022	182.84	1322	0.2308	788	1859
3	3	114	69	134	726	720.225	219.5	1	1	37	1591	411.53	2792	0.4	802	1557
3	3	114	70	135	793	777.729	312.8	2	1	21	1496	444.1	2266	0.8	799	1323
3	3	114	70	135	793	777.729	312.8	2	2	26	1215	225.55	1601	0.6667	804	1315
3	3	114	71	136	1822	936.054	454.9	4	1	22	1568	413.05	2337	0.8095	809	1468
3	3	114	71	136	1822	936.054	454.9	4	2	19	1897	419.43	2793	1	813	1473
3	3	114	71	136	1822	936.054	454.9	4	3	17	1305	184.34	1614	0.8095	815	1479
3	3	114	71	136	1822	936.054	454.9	4	4	25	1688	451.97	2643	0.5714	824	1483
3	3	114	72	137	631	745.36	196.1	1	1	36	1356	295.27	2085	0.6667	829	954
3	3	114	73	138	620	823.693	376.5	2	1	22	1452	458.72	2456	0.5385	835	200
3	3	114	73	138	620	823.693	376.5	2	2	20	1193	315.2	1698	0.6923	844	197
3	3	114	74	139	751	702.281	140.5	2	1	13	1412	422.32	2115	0.0714	840	1302
3	3	114	74	139	751	702.281	140.5	2	2	22	1235	371.85	1906	0.7143	850	1290
3	3	114	75	140	920	840.938	351.9	2	1	23	1427	475.45	2376	0.5625	864	997
3	3	114	75	140	920	840.938	351.9	2	2	23	2032	708.17	3413	0.3125	874	981
3	3	114	76	141	605	798.484	365.3	2	1	23	1761	526.61	2784	0.6923	873	1075
3	3	114	76	141	605	798.484	365.3	2	2	19	1389	284.72	2001	0.4615	879	1081
3	3	114	77	142	694	721.617	179	2	1	26	1296	341.76	1893	0.3571	885	1321
3	3	114	77	142	694	721.617	179	2	2	22	1257	361.14	2017	0.1429	898	1304
3	3	114	78	143	625	813.01	384.6	2	1	21	1374	417.25	2054	0.5714	885	1028
3	3	114	78	143	625	813.01	384.6	2	2	21	1224	338.62	1912	0.5	894	1025
3	3	114	79	144	1176	727.997	185.5	3	1	49	1380	244.53	1877	0.4375	888	1629
3	3	114	79	144	1176	727.997	185.5	3	2	37	1444	282.07	1954	0.5	904	1644
3	3	114	79	144	1176	727.997	185.5	3	3	17	911	181.77	1200	0.3125	908	1634
3	3	114	80	145	660	771.795	307	1	1	32	1781	514.63	2720	0.9286	899	1573
3	3	114	81	146	811	752.713	266.6	2	1	22	1417	434.65	2287	0.5333	904	1865
3	3	114	81	146	811	752.713	266.6	2	2	22	1239	327.84	1813	0.5333	910	1879
3	3	114	82	147	737	784.313	319	2	1	22	1213	378.05	1919	0.3333	934	1094
3	3	114	82	147	737	784.313	319	2	2	17	1059	230.56	1447	0.6	941	1097
3	3	114	83	148	690	775.533	260.9	2	1	22	1452	452.62	2421	0.5714	944	1225
3	3	114	83	148	690	775.533	260.9	2	2	24	1241	390.07	1943	0.5	952	1215
3	3	114	84	149	635	748.116	202.8	2	1	22	1644	514.68	2512	0.5714	961	999
3	3	114	84	149	635	748.116	202.8	2	2	12	1329	448.61	2222	0.1429	971	1006
3	3	114	85	150	1178	749.699	238	2	1	24	1031	225.82	1502	0.4286	971	295
3	3	114	85	150	1178	749.699	238	2	2	36	1356	363.11	2265	1	996	292
3	3	114	86	151	1484	784.148	274.5	4	1	20	1121	297.51	1718	0.5294	1029	1661
3	3	114	86	151	1484	784.148	274.5	4	2	20	1196	275.61	1710	0.7647	1037	1686
3	3	114	86	151	1484	784.148	274.5	4	3	20	1180	316.12	1775	0.7647	1040	1673
3	3	114	86	151	1484	784.148	274.5	4	4	22	1157	248.59	1708	0.4118	1044	1694
3	3	114	87	152	696	821.187	396.6	1	1	28	2010	657.43	3129	0.8	1035	388
3	3	114	88	153	1061	817.675	322.1	2	1	25	1937	628.77	3273	0.6111	1056	1878
3	3	114	88	153	1061	817.675	322.1	2	2	22	1482	386.36	2291	0.5	1061	1890
3	3	114	89	154	651	765.76	280.5	1	1	24	1560	536.57	2549	0.3571	1043	363
3	3	114	90	155	2581	795.851	284.3	6	1	27	2051	640.54	3318	0.4444	1049	1029
3	3	114	90	155	2581	795.851	284.3	6	2	24	1277	310.39	1905	0.2222	1071	1034
3	3	114	90	155	2581	795.851	284.3	6	3	22	1511	478.7	2496	0.3889	1082	1041
3	3	114	90	155	2581	795.851	284.3	6	4	17	1091	199.83	1447	0.8333	1084	1059
3	3	114	90	155	2581	795.851	284.3	6	5	24	1356	269.87	1987	0.7222	1092	1055
3	3	114	90	155	2581	795.851	284.3	6	6	26	1073	227.95	1590	0.2222	1115	1064
3	3	114	91	156	725	773.527	302.4	2	1	21	1460	481.92	2316	0.2	1043	1502
3	3	114	91	156	725	773.527	302.4	2	2	22	1322	404.52	2048	0.9333	1056	1501
3	3	114	92	157	697	768.029	298.3	2	1	9	776	41.29	828	0.6923	1099	1601
3	3	114	92	157	697	768.029	298.3	2	2	23	1287	364.22	2027	0.7692	1100	1611
3	3	114	93	158	846	807.8	349	2	1	21	1355	398.53	2032	0.5	1110	1534
3	3	114	93	158	846	807.8	349	2	2	24	1677	538.47	2862	0.5625	1119	1520
3	3	114	94	159	1192	877.005	399.5	2	1	24	1711	480.98	2637	0.8235	1116	1308
3	3	114	94	159	1192	877.005	399.5	2	2	36	2584	785.5	4095	0.7647	1120	1297
3	3	114	95	160	657	702.648	130.1	1	1	39	1212	205.1	1607	0.7143	1130	1488
3	3	114	96	161	851	790.618	277.1	1	1	29	1712	541.16	2826	0.2667	1135	436
3	3	114	97	162	1143	876.341	393.3	2	1	24	1945	718.62	3261	0.7222	1155	657
3	3	114	97	162	1143	876.341	393.3	2	2	23	1900	604.47	3238	0.6111	1161	664
3	3	114	98	163	2096	814.715	274.9	4	1	25	1885	540.05	2932	0.2632	1213	1517
3	3	114	98	163	2096	814.715	274.9	4	2	26	1552	295.69	2170	0.7895	1219	1528
3	3	114	98	163	2096	814.715	274.9	4	3	21	1254	349.66	1924	0.4737	1232	1544
3	3	114	98	163	2096	814.715	274.9	4	4	21	1453	373.35	2069	0.5789	1241	1544
3	3	114	99	164	629	776.231	289.2	2	1	32	965	174.66	1277	0.6154	1203	667
3	3	114	99	164	629	776.231	289.2	2	2	20	1351	436.07	2265	0.7692	1213	666
3	3	114	100	165	601	712.963	133.5	1	1	43	1404	298.7	1945	0.3846	1217	565
3	3	114	101	166	917	803.839	253.4	2	1	17	1981	623.65	2985	0.125	1222	1265
3	3	114	101	166	917	803.839	253.4	2	2	24	1653	532.89	2610	0.6875	1244	1259
3	3	114	102	167	612	778.869	289.2	2	1	21	1326	370.83	2134	0.5385	1237	2011
3	3	114	102	167	612	778.869	289.2	2	2	21	1211	252.54	1661	0.6923	1245	2018
3	3	114	103	168	1098	880.447	382.7	1	1	40	2102	642.11	3578	0.5294	1268	691
3	3	114	104	169	1114	890.209	430.9	3	1	15	1580	439.19	2249	0.6111	1322	1969
3	3	114	104	169	1114	890.209	430.9	3	2	10	1198	157.8	1396	0.7222	1324	1976
3	3	114	104	169	1114	890.209	430.9	3	3	21	2452	677.05	3893	0.7222	1328	1969
3	3	114	105	170	707	784.1	319.6	1	1	24	2048	629.25	3157	0.3333	1335	1885
3	3	114	106	171	616	743.492	208	2	1	21	1302	344.24	1924	0.5	1361	1730
3	3	114	106	171	616	743.492	208	2	2	19	1211	268.88	1710	0.5714	1368	1727
3	3	114	107	172	773	813.624	328	2	1	19	920	164.79	1186	0.5333	1421	1674
3	3	114	107	172	773	813.624	328	2	2	16	892	156.72	1245	0.5333	1428	1686
3	3	114	108	173	1198	869.498	378.3	1	1	43	1929	624.88	3276	0.5	1454	1146
3	3	114	109	174	607	737.715	186.2	2	1	20	1480	466.53	2291	0.1538	1436	714
3	3	114	109	174	607	737.715	186.2	2	2	24	1499	462.51	2469	0.2308	1449	718
3	3	114	110	175	1374	798.386	269.6	3	1	21	1723	513.97	2661	0.8125	1588	1883
3	3	114	110	175	1374	798.386	269.6	3	2	23	1922	565.38	3135	0.75	1594	1886
3	3	114	110	175	1374	798.386	269.6	3	3	27	1878	647.09	3187	0.3125	1617	1878
3	3	114	111	176	1105	787.792	250.2	1	1	39	1611	335.73	2130	0.8235	1635	792
3	3	114	112	177	1089	793.787	234.5	1	1	23	1663	482.7	2463	0.375	1676	521
3	3	114	113	178	1244	756.195	249.7	2	1	32	1442	300.76	1957	0.1765	1689	1999
3	3	114	113	178	1244	756.195	249.7	2	2	25	1393	254.53	1952	0.4118	1698	2007
3	3	114	114	179	606	772.043	282.5	2	1	20	1394	430.9	2288	0.6667	1708	717
3	3	114	114	179	606	772.043	282.5	2	2	26	1631	492.28	2599	0.6667	1717	718
4	4	90	1	180	1493	716.66	108.4	7	1	16	707	89.73	841	0.3333	35	45
4	4	90	1	180	1493	716.66	108.4	7	2	20	793	131.27	981	0.4	36	37
4	4	90	1	180	1493	716.66	108.4	7	3	19	799	138.71	1036	0.7333	41	50
4	4	90	1	180	1493	716.66	108.4	7	4	17	798	118.88	961	0.7333	41	34
4	4	90	1	180	1493	716.66	108.4	7	5	38	820	157.99	1124	0.4	45	59
4	4	90	1	180	1493	716.66	108.4	7	6	19	682	89.74	828	0.4	50	31
4	4	90	1	180	1493	716.66	108.4	7	7	30	868	258.48	1444	0.6	70	31
4	4	90	2	181	1705	918.503	332.4	3	1	25	999	276.79	1512	0.6111	56	1669
4	4	90	2	181	1705	918.503	332.4	3	2	29	1149	246.05	1629	0.4444	65	1667
4	4	90	2	181	1705	918.503	332.4	3	3	58	1630	457.93	2863	0.7222	74	1659
4	4	90	3	182	953	897.663	297	2	1	21	761	144.56	1038	0.625	71	1488
4	4	90	3	182	953	897.663	297	2	2	37	1327	507.88	2596	0.375	77	1473
4	4	90	4	183	1445	971.048	345.3	4	1	39	1631	653.42	3161	0.5882	76	821
4	4	90	4	183	1445	971.048	345.3	4	2	31	1318	317.48	1992	0.9412	84	807
4	4	90	4	183	1445	971.048	345.3	4	3	36	1495	458.71	2586	0.6471	87	819
4	4	90	4	183	1445	971.048	345.3	4	4	30	1217	229.94	1800	0.5294	93	805
4	4	90	5	184	1428	957.889	337.6	3	1	54	1060	238.38	1581	0.8333	79	1769
4	4	90	5	184	1428	957.889	337.6	3	2	34	1414	463.12	2396	0.2778	99	1749
4	4	90	5	184	1428	957.889	337.6	3	3	37	1426	432.5	2417	0.2778	104	1759
4	4	90	6	185	890	982.256	375.3	2	1	43	1802	706.65	3596	0.625	102	1199
4	4	90	6	185	890	982.256	375.3	2	2	42	1798	637.27	3182	0.5	110	1185
4	4	90	7	186	883	983.558	431.4	2	1	40	1506	479.9	2531	0.6875	130	1735
4	4	90	7	186	883	983.558	431.4	2	2	39	1507	501.36	2696	0.5625	145	1734
4	4	90	8	187	973	826.016	211.2	3	1	37	1237	409.46	2191	0.5714	138	189
4	4	90	8	187	973	826.016	211.2	3	2	32	1031	219.9	1581	0.6429	155	190
4	4	90	8	187	973	826.016	211.2	3	3	37	1208	249.93	1718	0.7143	163	182
4	4	90	9	188	805	903.321	235.9	3	1	49	950	252.63	1557	0.4167	152	313
4	4	90	9	188	805	903.321	235.9	3	2	27	844	207.36	1296	0.5	155	296
4	4	90	9	188	805	903.321	235.9	3	3	30	904	266.58	1476	0.3333	163	289
4	4	90	10	189	1147	1047.4	472	3	1	35	1571	559.41	2832	0.5	193	665
4	4	90	10	189	1147	1047.4	472	3	2	40	1701	500.57	2598	0.9375	200	656
4	4	90	10	189	1147	1047.4	472	3	3	38	1300	506.1	2548	0.4375	212	652
4	4	90	11	190	821	893.633	255.3	2	1	38	1335	291.59	1945	0.8667	202	1867
4	4	90	11	190	821	893.633	255.3	2	2	11	999	147.34	1244	0.4667	200	1861
4	4	90	12	191	1094	917.277	280.2	2	1	49	1242	294.02	2129	0.625	242	569
4	4	90	12	191	1094	917.277	280.2	2	2	26	1254	254.3	1840	0.8125	253	566
4	4	90	13	192	827	863.426	207.2	2	1	33	1416	435.29	2389	0.2	289	563
4	4	90	13	192	827	863.426	207.2	2	2	34	1291	442.88	2283	0.9333	293	551
4	4	90	14	193	1524	904.186	236.6	2	1	52	1740	518.65	2737	0.2105	311	1978
4	4	90	14	193	1524	904.186	236.6	2	2	36	1122	305.14	1747	0.6842	311	2006
4	4	90	15	194	999	937.435	345.3	1	1	46	2205	782.13	3936	0.5294	360	1934
4	4	90	16	195	926	829.437	128.3	3	1	44	942	240.14	1518	0.8333	351	329
4	4	90	16	195	926	829.437	128.3	3	2	31	1130	414.88	2078	0.25	352	359
4	4	90	16	195	926	829.437	128.3	3	3	37	1427	585.85	2753	0.5	357	345
4	4	90	17	196	704	908.185	388.9	1	1	52	1267	338.03	1952	0.7333	373	1132
4	4	90	18	197	2484	914.938	250.4	4	1	38	2128	836.06	4095	0.6667	375	1278
4	4	90	18	197	2484	914.938	250.4	4	2	37	1883	779.99	3945	0.6667	381	1288
4	4	90	18	197	2484	914.938	250.4	4	3	38	1984	684.72	3732	0.9524	395	1275
4	4	90	18	197	2484	914.938	250.4	4	4	39	1871	568.34	3155	0.7619	403	1265
4	4	90	19	198	648	961.137	438.4	1	1	36	1136	326.16	2006	0.7857	370	1377
4	4	90	20	199	1486	990.593	322.3	4	1	33	1109	337.27	1841	0.4706	394	466
4	4	90	20	199	1486	990.593	322.3	4	2	36	1112	355.83	1938	0.3529	396	447
4	4	90	20	199	1486	990.593	322.3	4	3	57	1228	292.13	1948	0.6471	404	479
4	4	90	20	199	1486	990.593	322.3	4	4	43	1549	454.55	2548	0.6471	412	466
4	4	90	21	200	992	903.784	301.8	2	1	38	1679	539.87	2953	0.4706	394	900
4	4	90	21	200	992	903.784	301.8	2	2	36	1954	724.94	3757	0.7647	404	890
4	4	90	22	201	1107	986.109	371.9	2	1	47	1720	545.15	2787	0.9444	412	1166
4	4	90	22	201	1107	986.109	371.9	2	2	65	1408	425.77	2373	0.5	421	1176
4	4	90	23	202	2401	1102.11	480.8	5	1	58	1465	390.13	2368	0.3478	410	1324
4	4	90	23	202	2401	1102.11	480.8	5	2	36	1340	402.69	2217	0.4783	432	1323
4	4	90	23	202	2401	1102.11	480.8	5	3	40	1010	190.11	1403	0.3913	437	1360
4	4	90	23	202	2401	1102.11	480.8	5	4	38	1607	486.88	2677	0.6957	437	1343
4	4	90	23	202	2401	1102.11	480.8	5	5	29	1245	426.52	2158	0.3478	440	1323
4	4	90	24	203	2708	954.447	331.8	7	1	36	1473	454.99	2574	0.5	422	603
4	4	90	24	203	2708	954.447	331.8	7	2	32	1622	499.47	2576	0.7727	429	611
4	4	90	24	203	2708	954.447	331.8	7	3	59	1235	308.06	2068	0.5909	436	585
4	4	90	24	203	2708	954.447	331.8	7	4	22	1449	274.61	1973	0.5909	434	616
4	4	90	24	203	2708	954.447	331.8	7	5	33	1367	408.46	2313	0.6818	442	611
4	4	90	24	203	2708	954.447	331.8	7	6	37	1165	374.74	2002	0.4091	459	588
4	4	90	24	203	2708	954.447	331.8	7	7	34	1174	372.1	2101	0.1818	467	597
4	4	90	25	204	880	890.623	244.4	2	1	37	1157	359.09	1939	0.4615	419	198
4	4	90	25	204	880	890.623	244.4	2	2	37	1244	465.68	2402	0.6923	439	194
4	4	90	26	205	1262	936.395	317.8	3	1	30	939	247.76	1552	0.3529	453	1395
4	4	90	26	205	1262	936.395	317.8	3	2	55	1099	288.89	1699	0.8235	469	1391
4	4	90	26	205	1262	936.395	317.8	3	3	37	1383	608.94	2988	0.2353	483	1378
4	4	90	27	206	1722	920.091	327.8	4	1	36	996	167.12	1333	0.5882	469	49
4	4	90	27	206	1722	920.091	327.8	4	2	35	1385	431.92	2377	0.4706	488	67
4	4	90	27	206	1722	920.091	327.8	4	3	39	1858	739.15	3579	0.8824	493	54
4	4	90	27	206	1722	920.091	327.8	4	4	41	1647	712.61	3505	0.5882	510	50
4	4	90	28	207	692	864.412	162.1	2	1	34	1047	306.08	1737	0.3077	466	235
4	4	90	28	207	692	864.412	162.1	2	2	34	996	237.56	1534	0.7692	473	248
4	4	90	29	208	608	867.87	244.4	2	1	31	1223	440.86	2126	0.3077	508	1570
4	4	90	29	208	608	867.87	244.4	2	2	29	1127	295.36	1843	0.4615	515	1574
4	4	90	30	209	714	815.738	216.4	1	1	39	1950	662.43	3387	0.7333	523	908
4	4	90	31	210	886	971.309	379	2	1	38	1455	592.34	2996	0.25	519	1352
4	4	90	31	210	886	971.309	379	2	2	34	1073	314.51	1671	0.6875	531	1362
4	4	90	32	211	687	992.489	375.4	2	1	31	1253	424.04	2101	0.5714	548	647
4	4	90	32	211	687	992.489	375.4	2	2	32	1197	420.95	2063	1	549	639
4	4	90	33	212	1042	958.204	331.6	2	1	34	1185	391.8	2121	1	553	1631
4	4	90	33	212	1042	958.204	331.6	2	2	38	1472	537.41	2734	0.2941	556	1645
4	4	90	34	213	686	944.182	415.6	1	1	50	1274	303.54	1801	0.6923	562	1309
4	4	90	35	214	1149	998.218	435	3	1	62	1340	412.55	2354	0.7222	572	1262
4	4	90	35	214	1149	998.218	435	3	2	36	1321	425.75	2272	0.3889	571	1275
4	4	90	35	214	1149	998.218	435	3	3	36	1225	414.38	2166	0.5	589	1260
4	4	90	36	215	649	849.738	258.7	2	1	29	886	236.65	1423	0.4286	569	1981
4	4	90	36	215	649	849.738	258.7	2	2	29	922	228.68	1405	0.8571	579	1985
4	4	90	37	216	876	937.981	406.2	2	1	36	1383	562.19	2916	0.6875	606	1672
4	4	90	37	216	876	937.981	406.2	2	2	33	1130	319.38	1709	0.75	607	1682
4	4	90	38	217	826	913.504	248.3	3	1	33	1276	507.34	2443	0.25	595	258
4	4	90	38	217	826	913.504	248.3	3	2	62	1202	315.41	2091	0.8333	604	272
4	4	90	38	217	826	913.504	248.3	3	3	33	1254	418.05	2222	0.9167	605	260
4	4	90	39	218	764	907.327	355.2	2	1	34	1087	353.87	1929	0.5	608	1363
4	4	90	39	218	764	907.327	355.2	2	2	14	672	67.23	758	0.2143	615	1387
4	4	90	40	219	788	927.124	388.9	2	1	30	1124	375.71	1991	0.8571	685	1535
4	4	90	40	219	788	927.124	388.9	2	2	22	1060	289.78	1751	0.5714	689	1529
4	4	90	41	220	636	915.789	201.4	2	1	28	1564	645.16	2950	0.25	699	73
4	4	90	41	220	636	915.789	201.4	2	2	40	1664	678.39	3309	0.5833	704	63
4	4	90	42	221	1344	851.182	184.1	2	1	39	1382	462.17	2474	0.2632	733	1877
4	4	90	42	221	1344	851.182	184.1	2	2	42	1478	489.81	2635	0.4737	748	1892
4	4	90	43	222	747	870.379	168.1	2	1	45	1061	232.17	1557	0.4545	726	185
4	4	90	43	222	747	870.379	168.1	2	2	44	1101	284.78	1775	0.6364	750	184
4	4	90	44	223	1154	1045.67	433.1	4	1	34	1590	633.79	2987	0.5	732	640
4	4	90	44	223	1154	1045.67	433.1	4	2	69	1746	532.59	3217	0.8333	737	652
4	4	90	44	223	1154	1045.67	433.1	4	3	15	1252	255.63	1639	0.5556	738	639
4	4	90	44	223	1154	1045.67	433.1	4	4	26	1208	285.9	1759	0.6667	746	648
4	4	90	45	224	2659	929.498	293.5	6	1	56	1171	318.57	1878	0.65	742	573
4	4	90	45	224	2659	929.498	293.5	6	2	39	1870	838.75	3905	0.4	756	597
4	4	90	45	224	2659	929.498	293.5	6	3	60	1373	534.62	2790	0.45	768	566
4	4	90	45	224	2659	929.498	293.5	6	4	39	2074	1008	4095	0.55	771	590
4	4	90	45	224	2659	929.498	293.5	6	5	37	1259	474.57	2581	0.25	789	608
4	4	90	45	224	2659	929.498	293.5	6	6	14	1137	372.96	1851	0.1	797	619
4	4	90	46	225	960	991.416	424.4	2	1	36	1397	486.93	2558	0.8824	784	1843
4	4	90	46	225	960	991.416	424.4	2	2	28	1134	297.34	1878	0.5294	791	1851
4	4	90	47	226	1196	975.147	342.4	2	1	61	1316	464.87	2482	0.5	788	828
4	4	90	47	226	1196	975.147	342.4	2	2	51	1981	769.77	3698	0.375	795	856
4	4	90	48	227	781	809.106	211.4	2	1	33	1087	329.64	1888	0.4667	814	1552
4	4	90	48	227	781	809.106	211.4	2	2	32	1157	336.88	1987	0.6	828	1551
4	4	90	49	228	2198	1019.81	421.9	4	1	39	1669	625.44	3141	0.6667	828	1105
4	4	90	49	228	2198	1019.81	421.9	4	2	36	1696	585.8	3024	0.5556	844	1114
4	4	90	49	228	2198	1019.81	421.9	4	3	39	2238	971.95	4095	0.5556	854	1113
4	4	90	49	228	2198	1019.81	421.9	4	4	41	1850	725.11	3665	0.5556	874	1099
4	4	90	50	229	931	849.988	231.7	1	1	40	1963	827.31	4095	0.5882	827	1787
4	4	90	51	230	905	933.287	254.5	2	1	39	1676	816.63	3712	0.3125	864	213
4	4	90	51	230	905	933.287	254.5	2	2	40	1618	660.3	3174	0.3125	876	230
4	4	90	52	231	746	958.528	344.3	3	1	28	1047	328.81	1703	0.4286	860	889
4	4	90	52	231	746	958.528	344.3	3	2	38	1604	578.39	3081	0.6429	864	898
4	4	90	52	231	746	958.528	344.3	3	3	20	1042	205.86	1477	0.7857	867	888
4	4	90	53	232	1210	949.902	345.8	2	1	36	1263	409.86	2173	0.4211	879	1701
4	4	90	53	232	1210	949.902	345.8	2	2	36	1417	593.21	2803	0.4737	899	1705
4	4	90	54	233	1038	864.024	284.5	4	1	32	1221	451.13	2301	0.25	876	358
4	4	90	54	233	1038	864.024	284.5	4	2	17	947	204.29	1448	0.1667	885	369
4	4	90	54	233	1038	864.024	284.5	4	3	33	1264	433.25	2190	0.5833	901	337
4	4	90	54	233	1038	864.024	284.5	4	4	32	1218	426.05	2109	0.4167	900	346
4	4	90	55	234	2304	1143.29	501.5	8	1	34	1626	663.47	3194	0.5238	896	990
4	4	90	55	234	2304	1143.29	501.5	8	2	27	1458	376.65	2213	0.7143	900	981
4	4	90	55	234	2304	1143.29	501.5	8	3	26	1170	313.65	1823	0.7143	901	966
4	4	90	55	234	2304	1143.29	501.5	8	4	30	1361	431.72	2269	0.7143	901	974
4	4	90	55	234	2304	1143.29	501.5	8	5	31	1055	280.3	1621	0.4286	902	958
4	4	90	55	234	2304	1143.29	501.5	8	6	26	985	219.31	1466	0.381	904	1006
4	4	90	55	234	2304	1143.29	501.5	8	7	29	1116	388.74	2043	0.619	912	1000
4	4	90	55	234	2304	1143.29	501.5	8	8	36	1359	592.33	2951	0.619	915	983
4	4	90	56	235	2034	1001.15	422.6	3	1	28	1061	266.04	1651	0.619	928	1960
4	4	90	56	235	2034	1001.15	422.6	3	2	27	1132	231.98	1541	0.7619	936	1968
4	4	90	56	235	2034	1001.15	422.6	3	3	59	1740	494.21	2944	0.9048	944	1977
4	4	90	57	236	988	951.727	310.8	2	1	56	1113	199.03	1483	0.7647	961	347
4	4	90	57	236	988	951.727	310.8	2	2	40	1726	505.77	2824	0.4706	971	355
4	4	90	58	237	831	982.745	367.7	4	1	26	1528	490.26	2384	0.2	946	410
4	4	90	58	237	831	982.745	367.7	4	2	35	1017	268.25	1486	0.4	953	394
4	4	90	58	237	831	982.745	367.7	4	3	33	1034	235.72	1532	0.6	961	411
4	4	90	58	237	831	982.745	367.7	4	4	34	1108	433.91	2148	0.4667	967	403
4	4	90	59	238	723	816.714	199.8	2	1	33	1649	380.05	2510	0.4	957	1140
4	4	90	59	238	723	816.714	199.8	2	2	36	1852	372.95	2676	0.3333	969	1134
4	4	90	60	239	2441	1126.41	470.9	5	1	38	1759	819.07	3628	0.2727	974	533
4	4	90	60	239	2441	1126.41	470.9	5	2	54	2479	957.27	4095	0.5455	974	567
4	4	90	60	239	2441	1126.41	470.9	5	3	39	1637	423.03	2521	0.6364	981	585
4	4	90	60	239	2441	1126.41	470.9	5	4	49	1691	567.89	3174	0.7273	987	555
4	4	90	60	239	2441	1126.41	470.9	5	5	41	1583	433.76	2613	0.5909	993	569
4	4	90	61	240	1562	987.227	380	5	1	24	1342	376.83	2081	0.5556	975	1177
4	4	90	61	240	1562	987.227	380	5	2	46	1903	493.37	2990	0.9444	983	1171
4	4	90	61	240	1562	987.227	380	5	3	28	1737	375.15	2696	0.7778	991	1156
4	4	90	61	240	1562	987.227	380	5	4	27	1461	386.13	2283	0.5	992	1175
4	4	90	61	240	1562	987.227	380	5	5	34	1892	673.76	3611	0.4444	998	1162
4	4	90	62	241	801	863.95	297.7	2	1	32	1273	444.4	2535	0.8	1036	1724
4	4	90	62	241	801	863.95	297.7	2	2	33	1288	434.37	2307	0.6	1035	1733
4	4	90	63	242	902	875.249	251.5	2	1	32	1075	292.06	1726	1	1040	1684
4	4	90	63	242	902	875.249	251.5	2	2	33	1165	360.17	1925	0.4375	1042	1675
4	4	90	64	243	729	926.368	393.2	2	1	29	937	247.76	1515	0.6	1107	1686
4	4	90	64	243	729	926.368	393.2	2	2	27	881	218.35	1350	0.5333	1119	1679
4	4	90	65	244	651	861.61	353	1	1	68	1040	162.9	1298	1	1117	1528
4	4	90	66	245	1172	921.025	388.9	3	1	31	1191	441.28	2176	0.6154	1128	1141
4	4	90	66	245	1172	921.025	388.9	3	2	39	2061	954.15	4095	0.6923	1129	1121
4	4	90	66	245	1172	921.025	388.9	3	3	28	1158	389.9	2064	0.6154	1132	1149
4	4	90	67	246	730	896.616	312.4	1	1	42	1582	487.98	2573	0.7333	1163	1684
4	4	90	68	247	1706	1083.92	495.3	3	1	74	1965	516.6	3608	0.7368	1162	860
4	4	90	68	247	1706	1083.92	495.3	3	2	36	1389	617.08	2864	0.5789	1173	837
4	4	90	68	247	1706	1083.92	495.3	3	3	31	1119	394.15	2023	0.5789	1177	846
4	4	90	69	248	665	829.956	206.7	2	1	31	1001	250.94	1608	0.4286	1204	1907
4	4	90	69	248	665	829.956	206.7	2	2	32	975	232.61	1549	0.6429	1216	1912
4	4	90	70	249	1038	1003.94	466.8	2	1	36	1769	645.71	3175	0.8235	1245	1911
4	4	90	70	249	1038	1003.94	466.8	2	2	28	1353	314.12	1960	0.8235	1251	1905
4	4	90	71	250	1104	932.078	321.1	2	1	37	1485	550.44	2818	0.5882	1268	1875
4	4	90	71	250	1104	932.078	321.1	2	2	39	1675	596.39	3191	0.3529	1288	1862
4	4	90	72	251	633	901.134	224.8	1	1	52	1343	354.02	2396	0.3077	1279	1595
4	4	90	73	252	1648	954.066	374.5	6	1	37	1405	553.43	2680	0.4	1297	1096
4	4	90	73	252	1648	954.066	374.5	6	2	32	1201	366.07	1981	0.7333	1298	1106
4	4	90	73	252	1648	954.066	374.5	6	3	30	989	258.02	1504	0.4	1308	1121
4	4	90	73	252	1648	954.066	374.5	6	4	33	1031	307.89	1744	0.6667	1310	1105
4	4	90	73	252	1648	954.066	374.5	6	5	32	1276	400.9	2064	0.6667	1326	1124
4	4	90	73	252	1648	954.066	374.5	6	6	33	1228	352.53	2033	0.5333	1334	1129
4	4	90	74	253	829	871.127	269.9	2	1	34	1136	336.96	1952	0.5333	1327	1677
4	4	90	74	253	829	871.127	269.9	2	2	33	1186	420.57	2178	0.8667	1337	1680
4	4	90	75	254	808	933.251	256.9	3	1	36	1193	368.51	1946	0.3077	1356	186
4	4	90	75	254	808	933.251	256.9	3	2	34	1131	453.63	2201	0.4615	1384	183
4	4	90	75	254	808	933.251	256.9	3	3	33	1304	472.25	2457	0.3846	1386	194
4	4	90	76	255	943	1017.36	432.9	2	1	45	2136	791.74	3959	0.6875	1402	1446
4	4	90	76	255	943	1017.36	432.9	2	2	9	902	132.83	1047	0.5	1407	1437
4	4	90	77	256	1391	815.06	158.2	2	1	40	1220	311.91	1895	0.6875	1430	1959
4	4	90	77	256	1391	815.06	158.2	2	2	51	1174	236.46	1823	0.4375	1440	1973
4	4	90	78	257	653	874.217	301.2	1	1	49	1231	308	1905	0.5714	1558	2022
4	4	90	79	258	1834	1042.46	386.4	4	1	32	937	281.63	1664	0.2632	1565	1309
4	4	90	79	258	1834	1042.46	386.4	4	2	34	1053	340.23	1823	0.3158	1577	1317
4	4	90	79	258	1834	1042.46	386.4	4	3	40	1056	250.7	1747	0.8947	1580	1296
4	4	90	79	258	1834	1042.46	386.4	4	4	41	1533	561.18	2871	0.5789	1593	1282
4	4	90	80	259	1008	994.126	384.7	2	1	40	1285	389.21	2079	0.4706	1575	1373
4	4	90	80	259	1008	994.126	384.7	2	2	40	1423	480.41	2684	0.7059	1589	1375
4	4	90	81	260	915	996.484	446.7	1	1	37	1286	434.07	2253	0.7059	1629	1545
4	4	90	82	261	1083	1000.51	394.2	3	1	51	1346	355.67	2051	0.8125	1667	1582
4	4	90	82	261	1083	1000.51	394.2	3	2	28	911	250.47	1444	0.5	1672	1571
4	4	90	82	261	1083	1000.51	394.2	3	3	29	1004	287.59	1621	0.4375	1677	1586
4	4	90	83	262	1003	1097.38	573	1	1	50	2000	496.9	3088	0.7647	1709	1916
4	4	90	84	263	812	1044	491.7	1	1	74	1268	243.6	1907	1	1714	1651
4	4	90	85	264	992	948.304	337.1	4	1	27	995	199.36	1455	0.2941	1746	1887
4	4	90	85	264	992	948.304	337.1	4	2	34	1229	394.19	2247	0.4706	1749	1866
4	4	90	85	264	992	948.304	337.1	4	3	30	1089	242.53	1677	0.7059	1749	1879
4	4	90	85	264	992	948.304	337.1	4	4	30	1012	193.48	1441	0.4706	1759	1885
4	4	90	86	265	1869	946.613	317	3	1	38	1311	189.43	1611	0.1579	1777	1910
4	4	90	86	265	1869	946.613	317	3	2	40	1256	255.62	1803	0.4737	1785	1898
4	4	90	86	265	1869	946.613	317	3	3	41	1893	703.28	3629	0.4211	1794	1940
4	4	90	87	266	835	984.149	356.6	1	1	63	1227	314.08	1986	0.5625	1799	2003
4	4	90	88	267	726	896.187	205.8	2	1	36	1759	621.1	3061	0.3077	1815	220
4	4	90	88	267	726	896.187	205.8	2	2	32	1703	603.41	3113	0.8462	1816	228
4	4	90	89	268	828	944.372	297.1	1	1	66	1426	405.59	2408	0.5	1829	1762
4	4	90	90	269	723	965.907	327.4	2	1	34	1051	292.06	1718	0.3333	2027	1961
4	4	90	90	269	723	965.907	327.4	2	2	32	918	259.12	1472	0.3333	2030	1941

## Sheet: ED3042_Rep2
DatasetName	ImageIndex	TotalCellCount	CellIndex	GlobalCellIndex	NuclearSize	AvgNuclearIntensity	std_NuclearIntensity	Cy5_NumSpotsPerCell	Cy5_SpotIndex	Cy5_SpotSize	Cy5_MeanSpotIntensity	Cy5_std_SpotIntensity	Cy5_MaxSpotIntensity	Cy5_SpotRRD	Cy5_Spot_centroidX	Cy5_Spot_centroidY
ED3042_20171011_oligo_Nuc_rDNA_001	1	27	1	1	531	2540	1001.3	1	1	23	395	73.65	535	0.6154	177	1118
ED3042_20171011_oligo_Nuc_rDNA_001	1	27	2	2	511	2310	869.8	1	1	24	407	104.67	690	0.4545	215	1910
ED3042_20171011_oligo_Nuc_rDNA_001	1	27	3	3	524	2530	1232.8	1	1	26	386	101.47	586	0.5833	326	1038
ED3042_20171011_oligo_Nuc_rDNA_001	1	27	4	4	568	2580	1273.1	2	1	19	328	77.53	459	0.3846	429	670
ED3042_20171011_oligo_Nuc_rDNA_001	1	27	4	4	568	2580	1273.1	2	2	18	320	71.32	426	0.7692	440	667
ED3042_20171011_oligo_Nuc_rDNA_001	1	27	5	5	630	2520	1022.5	2	1	16	312	52.29	400	0.3846	783	1207
ED3042_20171011_oligo_Nuc_rDNA_001	1	27	5	5	630	2520	1022.5	2	2	21	364	89.06	581	0.4615	790	1197
ED3042_20171011_oligo_Nuc_rDNA_001	1	27	6	6	818	2550	1264.8	2	1	17	384	98.88	599	0.6875	829	1175
ED3042_20171011_oligo_Nuc_rDNA_001	1	27	6	6	818	2550	1264.8	2	2	20	472	144.79	810	0.5625	836	1180
ED3042_20171011_oligo_Nuc_rDNA_001	1	27	7	7	703	2510	930.2	2	1	22	384	93.37	545	0.2857	1036	320
ED3042_20171011_oligo_Nuc_rDNA_001	1	27	7	7	703	2510	930.2	2	2	23	391	92.69	559	0.9286	1048	324
ED3042_20171011_oligo_Nuc_rDNA_001	1	27	9	9	658	2490	1236.8	2	1	19	375	91.4	511	0.2857	1257	1750
ED3042_20171011_oligo_Nuc_rDNA_001	1	27	9	9	658	2490	1236.8	2	2	21	381	81.18	598	0.8571	1266	1752
ED3042_20171011_oligo_Nuc_rDNA_001	1	27	10	10	794	2540	1005.3	2	1	16	359	51.74	472	0.4	1299	155
ED3042_20171011_oligo_Nuc_rDNA_001	1	27	10	10	794	2540	1005.3	2	2	20	401	96.12	585	0.5333	1302	149
ED3042_20171011_oligo_Nuc_rDNA_001	1	27	11	11	852	2420	1266.3	2	1	20	351	81.72	524	0.5	1338	1588
ED3042_20171011_oligo_Nuc_rDNA_001	1	27	11	11	852	2420	1266.3	2	2	22	395	102.92	593	0.625	1351	1586
ED3042_20171011_oligo_Nuc_rDNA_001	1	27	12	12	895	2470	1248.3	1	1	35	484	142.92	836	0.5	1389	444
ED3042_20171011_oligo_Nuc_rDNA_001	1	27	14	14	619	2500	984.4	1	1	39	399	81.21	545	0.5385	1496	1886
ED3042_20171011_oligo_Nuc_rDNA_001	1	27	18	18	560	2510	1147.9	2	1	19	368	76.54	490	0.4167	1587	1858
ED3042_20171011_oligo_Nuc_rDNA_001	1	27	18	18	560	2510	1147.9	2	2	21	354	74.29	513	0.5	1594	1853
ED3042_20171011_oligo_Nuc_rDNA_001	1	27	20	20	663	2610	1161.9	2	1	20	379	87.92	518	0.7143	1620	815
ED3042_20171011_oligo_Nuc_rDNA_001	1	27	20	20	663	2610	1161.9	2	2	20	414	117.62	630	0.3571	1629	818
ED3042_20171011_oligo_Nuc_rDNA_001	1	27	23	23	573	2410	1136.8	1	1	33	383	67.5	521	0.75	1883	1915
ED3042_20171011_oligo_Nuc_rDNA_001	1	27	25	25	630	2490	1178.9	2	1	21	369	92.94	534	0.3846	1937	1871
ED3042_20171011_oligo_Nuc_rDNA_001	1	27	25	25	630	2490	1178.9	2	2	17	316	54.05	446	0.6923	1946	1879
ED3042_20171011_oligo_Nuc_rDNA_002	2	46	1	28	759	2610	1184.5	2	1	19	390	81.12	541	0.6667	207	412
ED3042_20171011_oligo_Nuc_rDNA_002	2	46	1	28	759	2610	1184.5	2	2	17	400	80.35	536	0.3333	207	426
ED3042_20171011_oligo_Nuc_rDNA_002	2	46	2	29	891	2560	1025.4	2	1	20	429	105.73	608	0.25	214	291
ED3042_20171011_oligo_Nuc_rDNA_002	2	46	2	29	891	2560	1025.4	2	2	18	462	68.87	564	0.25	219	296
ED3042_20171011_oligo_Nuc_rDNA_002	2	46	3	30	899	2620	1237	1	1	39	611	146.63	959	0.4375	259	1213
ED3042_20171011_oligo_Nuc_rDNA_002	2	46	4	31	490	2610	1110.2	2	1	15	375	86.71	531	0.5	364	743
ED3042_20171011_oligo_Nuc_rDNA_002	2	46	4	31	490	2610	1110.2	2	2	13	346	57.58	425	1	368	738
ED3042_20171011_oligo_Nuc_rDNA_002	2	46	5	32	642	2670	1181.8	2	1	19	390	85.93	594	0.5714	374	994
ED3042_20171011_oligo_Nuc_rDNA_002	2	46	5	32	642	2670	1181.8	2	2	18	394	104.3	617	0.4286	387	988
ED3042_20171011_oligo_Nuc_rDNA_002	2	46	6	33	528	2550	1010.2	2	1	16	335	47.7	396	0.5833	409	286
ED3042_20171011_oligo_Nuc_rDNA_002	2	46	6	33	528	2550	1010.2	2	2	15	348	70.35	453	0.5	413	296
ED3042_20171011_oligo_Nuc_rDNA_002	2	46	8	35	530	2610	1169	1	1	27	385	62.35	503	0.5	505	1779
ED3042_20171011_oligo_Nuc_rDNA_002	2	46	9	36	493	2580	1051.5	1	1	22	443	101.66	641	0.6667	516	298
ED3042_20171011_oligo_Nuc_rDNA_002	2	46	10	37	620	2620	1215.4	2	1	18	438	120.4	703	0.9231	532	1388
ED3042_20171011_oligo_Nuc_rDNA_002	2	46	10	37	620	2620	1215.4	2	2	12	344	65.57	428	0.4615	537	1381
ED3042_20171011_oligo_Nuc_rDNA_002	2	46	11	38	531	2610	1214.2	1	1	19	517	137.17	784	0.8333	563	1458
ED3042_20171011_oligo_Nuc_rDNA_002	2	46	12	39	796	2610	1225.3	2	1	20	381	106.08	552	0.4667	602	743
ED3042_20171011_oligo_Nuc_rDNA_002	2	46	12	39	796	2610	1225.3	2	2	16	360	68.41	488	0.5333	605	733
ED3042_20171011_oligo_Nuc_rDNA_002	2	46	13	40	501	2670	1130.2	1	1	18	331	61.28	444	0.5	625	481
ED3042_20171011_oligo_Nuc_rDNA_002	2	46	14	41	619	2600	1097.8	1	1	31	373	62.54	507	0.5385	633	1989
ED3042_20171011_oligo_Nuc_rDNA_002	2	46	16	43	895	2530	1260	1	1	30	402	94.9	654	0.4375	789	1917
ED3042_20171011_oligo_Nuc_rDNA_002	2	46	17	44	512	2630	1239.6	1	1	30	451	102.83	654	0.5833	913	1053
ED3042_20171011_oligo_Nuc_rDNA_002	2	46	19	46	501	2600	1217.4	1	1	23	600	196.02	1079	0.4167	989	1962
ED3042_20171011_oligo_Nuc_rDNA_002	2	46	22	49	542	2620	1189.3	2	1	15	401	93.78	552	0.3846	1050	266
ED3042_20171011_oligo_Nuc_rDNA_002	2	46	22	49	542	2620	1189.3	2	2	17	398	58.73	489	0.5385	1057	266
ED3042_20171011_oligo_Nuc_rDNA_002	2	46	23	50	559	2610	1221.4	1	1	20	494	143.96	814	0.3846	1136	873
ED3042_20171011_oligo_Nuc_rDNA_002	2	46	25	52	609	2670	1201.8	2	1	17	391	71.8	511	0.7692	1233	1169
ED3042_20171011_oligo_Nuc_rDNA_002	2	46	25	52	609	2670	1201.8	2	2	16	436	88.29	572	0.6923	1241	1169
ED3042_20171011_oligo_Nuc_rDNA_002	2	46	26	53	620	2610	1235.2	2	1	16	362	80.37	530	0.4615	1317	1797
ED3042_20171011_oligo_Nuc_rDNA_002	2	46	26	53	620	2610	1235.2	2	2	17	418	104.7	596	0.5385	1325	1808
ED3042_20171011_oligo_Nuc_rDNA_002	2	46	27	54	651	2420	788.6	2	1	18	434	90.81	570	0.4286	1333	1220
ED3042_20171011_oligo_Nuc_rDNA_002	2	46	27	54	651	2420	788.6	2	2	16	373	51.31	482	0.4286	1342	1222
ED3042_20171011_oligo_Nuc_rDNA_002	2	46	29	56	727	2240	1099.9	2	1	18	564	122.04	799	0.6429	1548	478
ED3042_20171011_oligo_Nuc_rDNA_002	2	46	29	56	727	2240	1099.9	2	2	17	568	121.32	767	0.5714	1551	484
ED3042_20171011_oligo_Nuc_rDNA_002	2	46	32	59	554	2660	1191.2	2	1	16	381	88.86	562	0.7692	1564	1111
ED3042_20171011_oligo_Nuc_rDNA_002	2	46	32	59	554	2660	1191.2	2	2	18	451	93.56	649	0.4615	1572	1115
ED3042_20171011_oligo_Nuc_rDNA_002	2	46	33	60	538	2590	1235.7	1	1	29	376	70.36	566	0.6154	1580	1305
ED3042_20171011_oligo_Nuc_rDNA_002	2	46	38	65	761	1800	587.6	1	1	21	529	156.54	844	0.8571	1666	167
ED3042_20171011_oligo_Nuc_rDNA_002	2	46	39	66	740	2590	1231.1	2	1	18	377	60.29	466	0.4	1687	1843
ED3042_20171011_oligo_Nuc_rDNA_002	2	46	39	66	740	2590	1231.1	2	2	20	429	105.43	641	0.6667	1690	1850
ED3042_20171011_oligo_Nuc_rDNA_002	2	46	40	67	563	2570	1164.4	2	1	17	365	81.1	498	0.5385	1737	1354
ED3042_20171011_oligo_Nuc_rDNA_002	2	46	40	67	563	2570	1164.4	2	2	20	416	102.45	649	0.6923	1743	1361
ED3042_20171011_oligo_Nuc_rDNA_002	2	46	42	69	559	2590	1114.6	2	1	14	331	72.29	460	0.3077	1790	1930
ED3042_20171011_oligo_Nuc_rDNA_002	2	46	42	69	559	2590	1114.6	2	2	18	410	98.08	610	0.3077	1800	1939
ED3042_20171011_oligo_Nuc_rDNA_003	3	44	2	75	464	2470	1041.1	2	1	21	371	93.72	556	0.5	33	562
ED3042_20171011_oligo_Nuc_rDNA_003	3	44	2	75	464	2470	1041.1	2	2	17	336	71.25	466	0.5	41	561
ED3042_20171011_oligo_Nuc_rDNA_003	3	44	3	76	507	2230	736.1	2	1	20	377	110.29	620	0.25	43	1771
ED3042_20171011_oligo_Nuc_rDNA_003	3	44	3	76	507	2230	736.1	2	2	19	299	51.78	404	0.5	60	1769
ED3042_20171011_oligo_Nuc_rDNA_003	3	44	4	77	499	2550	1125.1	1	1	36	365	72.97	500	0.75	109	1050
ED3042_20171011_oligo_Nuc_rDNA_003	3	44	5	78	679	2600	1199.3	1	1	32	379	95.31	546	0.5	133	978
ED3042_20171011_oligo_Nuc_rDNA_003	3	44	6	79	752	2440	1212.9	2	1	20	353	71.22	510	0.8	139	1958
ED3042_20171011_oligo_Nuc_rDNA_003	3	44	6	79	752	2440	1212.9	2	2	19	400	81.01	557	0.6667	146	1955
ED3042_20171011_oligo_Nuc_rDNA_003	3	44	9	82	528	2570	1042.3	2	1	19	382	114.13	577	0.3333	304	1216
ED3042_20171011_oligo_Nuc_rDNA_003	3	44	9	82	528	2570	1042.3	2	2	20	354	81.87	493	0.4167	316	1212
ED3042_20171011_oligo_Nuc_rDNA_003	3	44	10	83	412	2370	963.4	2	1	20	293	49.62	383	0.3	326	78
ED3042_20171011_oligo_Nuc_rDNA_003	3	44	10	83	412	2370	963.4	2	2	19	341	78.42	493	0.5	329	68
ED3042_20171011_oligo_Nuc_rDNA_003	3	44	12	85	845	2570	1191.2	2	1	22	387	89.39	568	0.3125	351	362
ED3042_20171011_oligo_Nuc_rDNA_003	3	44	12	85	845	2570	1191.2	2	2	22	441	128.96	716	0.75	360	348
ED3042_20171011_oligo_Nuc_rDNA_003	3	44	14	87	845	2500	1251.5	2	1	22	382	99.14	572	0.5625	412	463
ED3042_20171011_oligo_Nuc_rDNA_003	3	44	14	87	845	2500	1251.5	2	2	20	436	114.45	704	0.75	413	471
ED3042_20171011_oligo_Nuc_rDNA_003	3	44	15	88	791	2580	1256.4	2	1	24	439	113.52	649	0.5333	516	1631
ED3042_20171011_oligo_Nuc_rDNA_003	3	44	15	88	791	2580	1256.4	2	2	22	392	96.19	593	0.5333	525	1617
ED3042_20171011_oligo_Nuc_rDNA_003	3	44	16	89	876	2470	1255.2	1	1	39	480	119.03	705	0.875	549	911
ED3042_20171011_oligo_Nuc_rDNA_003	3	44	17	90	581	2650	1116.5	2	1	19	391	96.51	556	0.5385	546	1099
ED3042_20171011_oligo_Nuc_rDNA_003	3	44	17	90	581	2650	1116.5	2	2	21	381	96.99	554	0.8462	547	1109
ED3042_20171011_oligo_Nuc_rDNA_003	3	44	18	91	685	2550	1217.1	1	1	33	380	79.37	580	0.6429	564	112
ED3042_20171011_oligo_Nuc_rDNA_003	3	44	19	92	514	2620	1172	1	1	28	436	98.11	631	0.5833	599	430
ED3042_20171011_oligo_Nuc_rDNA_003	3	44	21	94	484	2630	1126.4	2	1	21	326	70.53	470	0.4167	739	1925
ED3042_20171011_oligo_Nuc_rDNA_003	3	44	21	94	484	2630	1126.4	2	2	23	404	113.9	650	0.3333	742	1909
ED3042_20171011_oligo_Nuc_rDNA_003	3	44	22	95	570	2540	1228.5	2	1	19	394	87.52	588	0.3077	750	809
ED3042_20171011_oligo_Nuc_rDNA_003	3	44	22	95	570	2540	1228.5	2	2	20	390	108.53	612	0.7692	756	803
ED3042_20171011_oligo_Nuc_rDNA_003	3	44	27	100	509	2540	1218.6	2	1	20	402	102.39	582	0.5833	1136	1848
ED3042_20171011_oligo_Nuc_rDNA_003	3	44	27	100	509	2540	1218.6	2	2	18	349	68.45	475	0.8333	1139	1855
ED3042_20171011_oligo_Nuc_rDNA_003	3	44	28	101	530	2570	1240	2	1	17	374	89.68	591	0.5385	1203	1795
ED3042_20171011_oligo_Nuc_rDNA_003	3	44	28	101	530	2570	1240	2	2	19	403	78.69	603	0.8462	1211	1795
ED3042_20171011_oligo_Nuc_rDNA_003	3	44	29	102	861	2520	1265.4	2	1	24	470	158.45	898	0.375	1218	1634
ED3042_20171011_oligo_Nuc_rDNA_003	3	44	29	102	861	2520	1265.4	2	2	21	374	98.48	576	0.5625	1219	1648
ED3042_20171011_oligo_Nuc_rDNA_003	3	44	30	103	538	2600	1221	1	1	24	616	211.11	1038	0.5	1223	689
ED3042_20171011_oligo_Nuc_rDNA_003	3	44	31	104	871	2570	1266.5	2	1	22	457	128.92	709	0.875	1309	1774
ED3042_20171011_oligo_Nuc_rDNA_003	3	44	31	104	871	2570	1266.5	2	2	17	461	105.5	694	0.5	1313	1779
ED3042_20171011_oligo_Nuc_rDNA_003	3	44	32	105	551	2620	1170.1	1	1	37	398	83.38	556	0.6923	1347	315
ED3042_20171011_oligo_Nuc_rDNA_003	3	44	33	106	724	2650	1175.2	1	1	37	476	104.59	683	0.4	1350	1265
ED3042_20171011_oligo_Nuc_rDNA_003	3	44	34	107	786	2530	1255.1	2	1	24	376	85.24	517	0.4667	1451	399
ED3042_20171011_oligo_Nuc_rDNA_003	3	44	34	107	786	2530	1255.1	2	2	22	424	121	672	0.6667	1462	403
ED3042_20171011_oligo_Nuc_rDNA_003	3	44	35	108	738	2620	1202.6	2	1	23	432	121.58	696	0.6667	1513	540
ED3042_20171011_oligo_Nuc_rDNA_003	3	44	35	108	738	2620	1202.6	2	2	23	451	137.03	703	0.5333	1517	528
ED3042_20171011_oligo_Nuc_rDNA_003	3	44	37	110	710	2510	1249.3	2	1	21	391	89.06	524	0.7857	1657	512
ED3042_20171011_oligo_Nuc_rDNA_003	3	44	37	110	710	2510	1249.3	2	2	20	430	115.73	652	0.8571	1664	510
ED3042_20171011_oligo_Nuc_rDNA_003	3	44	38	111	571	2630	1177.9	2	1	21	445	101.29	633	0.3077	1663	803
ED3042_20171011_oligo_Nuc_rDNA_003	3	44	38	111	571	2630	1177.9	2	2	20	468	142.63	749	0.5385	1671	811
ED3042_20171011_oligo_Nuc_rDNA_003	3	44	40	113	570	2560	1198.2	2	1	21	370	82.75	531	0.4615	1728	694
ED3042_20171011_oligo_Nuc_rDNA_003	3	44	40	113	570	2560	1198.2	2	2	22	412	127.06	663	0.4615	1732	680
ED3042_20171011_oligo_Nuc_rDNA_003	3	44	41	114	820	2570	1252.6	2	1	21	420	99.93	613	0.375	1800	1103
ED3042_20171011_oligo_Nuc_rDNA_003	3	44	41	114	820	2570	1252.6	2	2	22	437	106.04	651	0.8125	1800	1094
ED3042_20171011_oligo_Nuc_rDNA_003	3	44	42	115	525	2530	1095.4	2	1	17	356	73.66	521	0.4167	1834	307
ED3042_20171011_oligo_Nuc_rDNA_003	3	44	42	115	525	2530	1095.4	2	2	19	411	111.61	646	0.6667	1844	299
ED3042_20171011_oligo_Nuc_rDNA_003	3	44	43	116	568	2450	1116.1	1	1	35	358	87.37	558	0.4167	1877	23
ED3042_20171011_oligo_Nuc_rDNA_003	3	44	44	117	558	2540	1180.5	2	1	17	282	45.2	395	0.8333	2008	1259
ED3042_20171011_oligo_Nuc_rDNA_003	3	44	44	117	558	2540	1180.5	2	2	16	283	53.02	401	0.5833	2012	1253
ED3042_20171011_oligo_Nuc_rDNA_004	4	50	1	118	477	2360	984.5	2	1	16	370	92.05	565	0.5455	42	1531
ED3042_20171011_oligo_Nuc_rDNA_004	4	50	1	118	477	2360	984.5	2	2	15	332	71.75	465	0.3636	56	1533
ED3042_20171011_oligo_Nuc_rDNA_004	4	50	2	119	421	2430	1079.8	2	1	12	345	73.32	456	0.6364	51	1857
ED3042_20171011_oligo_Nuc_rDNA_004	4	50	2	119	421	2430	1079.8	2	2	15	359	77.06	526	0.6364	58	1854
ED3042_20171011_oligo_Nuc_rDNA_004	4	50	3	120	834	2500	1102.7	2	1	22	488	160.23	790	0.25	90	275
ED3042_20171011_oligo_Nuc_rDNA_004	4	50	3	120	834	2500	1102.7	2	2	19	470	126.51	663	0.375	103	266
ED3042_20171011_oligo_Nuc_rDNA_004	4	50	4	121	561	2450	1155.8	1	1	21	376	64.95	499	0.6154	99	1619
ED3042_20171011_oligo_Nuc_rDNA_004	4	50	5	122	619	2420	1093.7	2	1	18	332	63.85	433	0.4615	110	952
ED3042_20171011_oligo_Nuc_rDNA_004	4	50	5	122	619	2420	1093.7	2	2	17	396	89.21	564	0.5385	117	965
ED3042_20171011_oligo_Nuc_rDNA_004	4	50	7	124	483	2530	1138.5	1	1	22	434	95.04	598	0.3333	202	1274
ED3042_20171011_oligo_Nuc_rDNA_004	4	50	9	126	742	2550	1129.1	2	1	19	402	88.12	571	0.4	255	1615
ED3042_20171011_oligo_Nuc_rDNA_004	4	50	9	126	742	2550	1129.1	2	2	24	473	133.48	763	0.4	256	1627
ED3042_20171011_oligo_Nuc_rDNA_004	4	50	10	127	522	2320	778.4	2	1	15	389	87.94	519	0.75	266	461
ED3042_20171011_oligo_Nuc_rDNA_004	4	50	10	127	522	2320	778.4	2	2	16	357	53.09	433	0.6667	271	468
ED3042_20171011_oligo_Nuc_rDNA_004	4	50	12	129	433	2340	831.7	1	1	23	448	94.5	620	0.1818	436	101
ED3042_20171011_oligo_Nuc_rDNA_004	4	50	13	130	589	2490	1183.8	2	1	16	380	79.35	529	0.3846	538	850
ED3042_20171011_oligo_Nuc_rDNA_004	4	50	13	130	589	2490	1183.8	2	2	17	355	61.71	493	0.6154	541	860
ED3042_20171011_oligo_Nuc_rDNA_004	4	50	14	131	552	2490	1182	2	1	16	339	76.22	538	0.2308	552	95
ED3042_20171011_oligo_Nuc_rDNA_004	4	50	14	131	552	2490	1182	2	2	17	351	78.69	488	0.4615	554	80
ED3042_20171011_oligo_Nuc_rDNA_004	4	50	15	132	533	2540	1181.4	2	1	14	391	61.33	518	0.5	601	1655
ED3042_20171011_oligo_Nuc_rDNA_004	4	50	15	132	533	2540	1181.4	2	2	20	417	89.7	574	0.6667	605	1645
ED3042_20171011_oligo_Nuc_rDNA_004	4	50	16	133	555	2560	1013.4	2	1	20	406	107.02	596	0.3846	604	465
ED3042_20171011_oligo_Nuc_rDNA_004	4	50	16	133	555	2560	1013.4	2	2	15	330	63.77	453	0.4615	614	454
ED3042_20171011_oligo_Nuc_rDNA_004	4	50	17	134	777	2580	1273.4	2	1	21	477	136.88	789	0.4667	626	881
ED3042_20171011_oligo_Nuc_rDNA_004	4	50	17	134	777	2580	1273.4	2	2	18	446	121.97	663	0.6	637	891
ED3042_20171011_oligo_Nuc_rDNA_004	4	50	18	135	747	2250	1112.7	2	1	16	491	51.59	587	0.8667	727	1691
ED3042_20171011_oligo_Nuc_rDNA_004	4	50	18	135	747	2250	1112.7	2	2	18	530	94.53	682	0.5333	734	1686
ED3042_20171011_oligo_Nuc_rDNA_004	4	50	19	136	525	2530	1045.2	2	1	20	399	95.5	571	0.5833	744	1734
ED3042_20171011_oligo_Nuc_rDNA_004	4	50	19	136	525	2530	1045.2	2	2	17	398	82.51	561	0.4167	752	1741
ED3042_20171011_oligo_Nuc_rDNA_004	4	50	20	137	595	2530	1070	2	1	15	406	99.62	593	0.4615	793	167
ED3042_20171011_oligo_Nuc_rDNA_004	4	50	20	137	595	2530	1070	2	2	14	394	57.5	496	0.3846	798	171
ED3042_20171011_oligo_Nuc_rDNA_004	4	50	21	138	489	2440	1115.7	1	1	18	503	125.29	754	0.4167	853	1472
ED3042_20171011_oligo_Nuc_rDNA_004	4	50	22	139	621	2300	724.2	1	1	24	628	158.21	895	0.6154	858	1014
ED3042_20171011_oligo_Nuc_rDNA_004	4	50	24	141	674	2520	1196	2	1	17	432	114.79	668	0.4286	923	1593
ED3042_20171011_oligo_Nuc_rDNA_004	4	50	24	141	674	2520	1196	2	2	18	483	94.68	695	0.5	926	1598
ED3042_20171011_oligo_Nuc_rDNA_004	4	50	26	143	753	2510	1252.5	2	1	15	418	95.49	575	0.4	1030	172
ED3042_20171011_oligo_Nuc_rDNA_004	4	50	26	143	753	2510	1252.5	2	2	21	481	117.61	673	0.7333	1035	169
ED3042_20171011_oligo_Nuc_rDNA_004	4	50	28	145	544	2600	1167.7	1	1	25	628	215.65	1056	0.6154	1137	1418
ED3042_20171011_oligo_Nuc_rDNA_004	4	50	30	147	603	2520	1263.9	1	1	31	427	84.13	604	1	1221	1501
ED3042_20171011_oligo_Nuc_rDNA_004	4	50	32	149	599	1320	308.4	0	NaN	NaN	NaN	NaN	NaN	NaN	NaN	NaN
ED3042_20171011_oligo_Nuc_rDNA_004	4	50	33	150	25	1180	126.3	0	NaN	NaN	NaN	NaN	NaN	NaN	NaN	NaN
ED3042_20171011_oligo_Nuc_rDNA_004	4	50	34	151	505	2300	939.5	2	1	11	386	46.31	469	0.25	1295	1762
ED3042_20171011_oligo_Nuc_rDNA_004	4	50	34	151	505	2300	939.5	2	2	14	471	62.63	561	0.4167	1299	1774
ED3042_20171011_oligo_Nuc_rDNA_004	4	50	35	152	641	2560	1254.4	2	1	16	497	138.86	722	0.9231	1333	1001
ED3042_20171011_oligo_Nuc_rDNA_004	4	50	35	152	641	2560	1254.4	2	2	18	491	125.51	769	0.7692	1340	1001
ED3042_20171011_oligo_Nuc_rDNA_004	4	50	36	153	523	2580	1199.1	1	1	34	495	120.19	773	0.6667	1362	1383
ED3042_20171011_oligo_Nuc_rDNA_004	4	50	37	154	744	2450	1264.8	2	1	18	468	120.66	667	1	1401	509
ED3042_20171011_oligo_Nuc_rDNA_004	4	50	37	154	744	2450	1264.8	2	2	19	435	115.52	657	0.5333	1408	505
ED3042_20171011_oligo_Nuc_rDNA_004	4	50	38	155	851	2540	1259.9	2	1	19	483	144.06	778	0.5	1451	612
ED3042_20171011_oligo_Nuc_rDNA_004	4	50	38	155	851	2540	1259.9	2	2	18	455	114.53	683	0.6875	1454	622
ED3042_20171011_oligo_Nuc_rDNA_004	4	50	39	156	687	2520	1237.4	2	1	17	443	139.12	717	0.4286	1446	379
ED3042_20171011_oligo_Nuc_rDNA_004	4	50	39	156	687	2520	1237.4	2	2	17	443	107.02	608	0.3571	1453	380
ED3042_20171011_oligo_Nuc_rDNA_004	4	50	40	157	727	2100	867.6	2	1	25	768	224.68	1203	0.3846	1474	1746
ED3042_20171011_oligo_Nuc_rDNA_004	4	50	40	157	727	2100	867.6	2	2	34	746	160.42	1029	0.5385	1483	1736
ED3042_20171011_oligo_Nuc_rDNA_004	4	50	45	162	720	2510	1234.3	2	1	18	441	81.06	608	0.5714	1804	1788
ED3042_20171011_oligo_Nuc_rDNA_004	4	50	45	162	720	2510	1234.3	2	2	15	414	70.15	538	0.4286	1817	1780
ED3042_20171011_oligo_Nuc_rDNA_004	4	50	46	163	695	2500	1229.9	2	1	16	413	98.5	642	0.5714	1815	1151
ED3042_20171011_oligo_Nuc_rDNA_004	4	50	46	163	695	2500	1229.9	2	2	19	368	94.4	550	0.5714	1828	1145
ED3042_20171011_oligo_Nuc_rDNA_004	4	50	49	166	656	2420	1202.3	2	1	13	342	75.25	442	0.7143	1889	260
ED3042_20171011_oligo_Nuc_rDNA_004	4	50	49	166	656	2420	1202.3	2	2	19	418	99.15	595	0.6429	1893	251
ED3042_20171011_oligo_Nuc_rDNA_005	5	47	1	168	641	2250	866.3	2	1	15	453	83.79	602	0.7143	17	2000
ED3042_20171011_oligo_Nuc_rDNA_005	5	47	1	168	641	2250	866.3	2	2	15	494	83.55	660	0.5714	23	2004
ED3042_20171011_oligo_Nuc_rDNA_005	5	47	2	169	443	2460	945.2	2	1	12	336	69.45	424	0.6364	107	281
ED3042_20171011_oligo_Nuc_rDNA_005	5	47	2	169	443	2460	945.2	2	2	13	368	67.91	468	0.3636	116	292
ED3042_20171011_oligo_Nuc_rDNA_005	5	47	3	170	787	2690	1202.7	1	1	23	769	214.75	1122	0.5333	117	1361
ED3042_20171011_oligo_Nuc_rDNA_005	5	47	4	171	760	2680	1129.3	1	1	19	555	161.05	819	0.3333	130	438
ED3042_20171011_oligo_Nuc_rDNA_005	5	47	5	172	680	2700	1190.2	1	1	16	474	112.32	685	0.4286	144	1948
ED3042_20171011_oligo_Nuc_rDNA_005	5	47	6	173	842	2670	1260.4	2	1	9	366	41.87	414	0.6667	211	1220
ED3042_20171011_oligo_Nuc_rDNA_005	5	47	6	173	842	2670	1260.4	2	2	18	594	161.19	872	0.8667	217	1226
ED3042_20171011_oligo_Nuc_rDNA_005	5	47	7	174	678	2500	853.1	2	1	15	391	69.43	537	0.2857	215	418
ED3042_20171011_oligo_Nuc_rDNA_005	5	47	7	174	678	2500	853.1	2	2	12	436	62.92	563	0.5	220	422
ED3042_20171011_oligo_Nuc_rDNA_005	5	47	8	175	458	2170	608.6	2	1	16	422	98.65	583	0.2727	246	344
ED3042_20171011_oligo_Nuc_rDNA_005	5	47	8	175	458	2170	608.6	2	2	11	315	48.2	368	0.3636	246	326
ED3042_20171011_oligo_Nuc_rDNA_005	5	47	9	176	447	2550	878.5	2	1	11	374	76.33	514	0.3333	273	459
ED3042_20171011_oligo_Nuc_rDNA_005	5	47	9	176	447	2550	878.5	2	2	11	339	60.34	473	0.75	277	453
ED3042_20171011_oligo_Nuc_rDNA_005	5	47	10	177	753	2650	1253.4	1	1	18	479	109.66	665	0.4667	316	1498
ED3042_20171011_oligo_Nuc_rDNA_005	5	47	11	178	612	2730	1182.1	2	1	16	445	108.19	682	0.3077	373	479
ED3042_20171011_oligo_Nuc_rDNA_005	5	47	11	178	612	2730	1182.1	2	2	17	488	127.65	676	0.3846	377	472
ED3042_20171011_oligo_Nuc_rDNA_005	5	47	12	179	856	2710	1207.8	2	1	20	585	156.51	797	0.5	377	1825
ED3042_20171011_oligo_Nuc_rDNA_005	5	47	12	179	856	2710	1207.8	2	2	20	620	186.36	922	0.5	391	1835
ED3042_20171011_oligo_Nuc_rDNA_005	5	47	13	180	475	2560	958.6	1	1	22	523	132.13	737	0.9167	428	1095
ED3042_20171011_oligo_Nuc_rDNA_005	5	47	14	181	850	2720	983.2	2	1	21	655	172.9	1042	0.875	438	550
ED3042_20171011_oligo_Nuc_rDNA_005	5	47	14	181	850	2720	983.2	2	2	20	578	170.13	862	0.375	444	538
ED3042_20171011_oligo_Nuc_rDNA_005	5	47	15	182	513	2700	1260.7	1	1	13	383	71.93	502	0.5	473	1297
ED3042_20171011_oligo_Nuc_rDNA_005	5	47	16	183	358	2580	1082	0	NaN	NaN	NaN	NaN	NaN	NaN	NaN	NaN
ED3042_20171011_oligo_Nuc_rDNA_005	5	47	17	184	704	2700	1145.4	1	1	15	457	90.96	626	0.6429	518	1899
ED3042_20171011_oligo_Nuc_rDNA_005	5	47	18	185	663	2750	1125.9	1	1	21	575	135.77	836	0.4286	551	512
ED3042_20171011_oligo_Nuc_rDNA_005	5	47	19	186	644	2560	1245.5	2	1	11	337	60.39	443	0.6429	563	673
ED3042_20171011_oligo_Nuc_rDNA_005	5	47	19	186	644	2560	1245.5	2	2	19	433	114.15	660	0.4286	575	678
ED3042_20171011_oligo_Nuc_rDNA_005	5	47	20	187	796	2680	1267.6	1	1	21	454	127.03	675	0.4667	601	356
ED3042_20171011_oligo_Nuc_rDNA_005	5	47	22	189	450	2580	987.4	1	1	15	432	81.76	605	0.7273	704	1908
ED3042_20171011_oligo_Nuc_rDNA_005	5	47	23	190	489	2700	1202.4	1	1	20	601	203.29	998	0.3333	755	1300
ED3042_20171011_oligo_Nuc_rDNA_005	5	47	24	191	779	2680	1156	0	NaN	NaN	NaN	NaN	NaN	NaN	NaN	NaN
ED3042_20171011_oligo_Nuc_rDNA_005	5	47	25	192	572	2470	1202.3	1	1	19	640	167.96	940	0.9231	798	1151
ED3042_20171011_oligo_Nuc_rDNA_005	5	47	26	193	591	2740	1119	2	1	16	469	121.45	699	0.3846	867	1480
ED3042_20171011_oligo_Nuc_rDNA_005	5	47	26	193	591	2740	1119	2	2	17	431	107.63	670	0.4615	873	1464
ED3042_20171011_oligo_Nuc_rDNA_005	5	47	27	194	751	2610	1244.3	2	1	14	414	97.24	586	0.7333	1023	838
ED3042_20171011_oligo_Nuc_rDNA_005	5	47	27	194	751	2610	1244.3	2	2	17	473	111.9	637	0.4667	1025	850
ED3042_20171011_oligo_Nuc_rDNA_005	5	47	28	195	474	2680	1029	2	1	16	378	94.02	567	0.3333	1035	251
ED3042_20171011_oligo_Nuc_rDNA_005	5	47	28	195	474	2680	1029	2	2	18	392	101.44	632	0.5	1046	255
ED3042_20171011_oligo_Nuc_rDNA_005	5	47	29	196	883	2650	1294.6	0	NaN	NaN	NaN	NaN	NaN	NaN	NaN	NaN
ED3042_20171011_oligo_Nuc_rDNA_005	5	47	31	198	726	2620	1257.6	2	1	18	512	124.91	747	0.7333	1148	748
ED3042_20171011_oligo_Nuc_rDNA_005	5	47	31	198	726	2620	1257.6	2	2	16	511	134.53	734	0.5333	1154	738
ED3042_20171011_oligo_Nuc_rDNA_005	5	47	33	200	518	2680	1121.2	2	1	15	405	105.84	557	0.3333	1200	1217
ED3042_20171011_oligo_Nuc_rDNA_005	5	47	33	200	518	2680	1121.2	2	2	16	475	118.73	667	0.8333	1209	1224
ED3042_20171011_oligo_Nuc_rDNA_005	5	47	34	201	896	2700	1230.1	2	1	17	605	164.68	822	0.4375	1245	832
ED3042_20171011_oligo_Nuc_rDNA_005	5	47	34	201	896	2700	1230.1	2	2	17	569	114.82	822	0.5	1248	838
ED3042_20171011_oligo_Nuc_rDNA_005	5	47	36	203	468	2700	1188.9	2	1	16	490	148.26	755	0.3333	1301	1064
ED3042_20171011_oligo_Nuc_rDNA_005	5	47	36	203	468	2700	1188.9	2	2	13	414	95.46	634	0.75	1305	1054
ED3042_20171011_oligo_Nuc_rDNA_005	5	47	37	204	660	2670	1240.1	2	1	16	427	122.25	684	0.3571	1316	1571
ED3042_20171011_oligo_Nuc_rDNA_005	5	47	37	204	660	2670	1240.1	2	2	16	463	117.13	663	0.4286	1332	1561
ED3042_20171011_oligo_Nuc_rDNA_005	5	47	38	205	773	2720	1159.8	2	1	18	537	158.19	821	0.3333	1397	929
ED3042_20171011_oligo_Nuc_rDNA_005	5	47	38	205	773	2720	1159.8	2	2	16	475	111.32	693	0.4667	1400	918
ED3042_20171011_oligo_Nuc_rDNA_005	5	47	39	206	455	2530	1000.6	2	1	13	435	96.39	601	0.4167	1425	2000
ED3042_20171011_oligo_Nuc_rDNA_005	5	47	39	206	455	2530	1000.6	2	2	14	443	87.14	570	0.5833	1428	2007
ED3042_20171011_oligo_Nuc_rDNA_005	5	47	40	207	648	2670	1245.4	1	1	20	462	103.18	727	0.5714	1545	636
ED3042_20171011_oligo_Nuc_rDNA_005	5	47	42	209	889	2570	1281.3	2	1	17	594	173.13	984	0.8125	1628	1522
ED3042_20171011_oligo_Nuc_rDNA_005	5	47	42	209	889	2570	1281.3	2	2	21	570	142.79	832	0.8125	1630	1528
ED3042_20171011_oligo_Nuc_rDNA_005	5	47	43	210	454	2640	1040.4	2	1	11	405	88.66	541	0.5455	1676	1828
ED3042_20171011_oligo_Nuc_rDNA_005	5	47	43	210	454	2640	1040.4	2	2	16	470	117.33	683	0.3636	1683	1825
ED3042_20171011_oligo_Nuc_rDNA_005	5	47	44	211	448	2340	1171.2	1	1	16	439	44.57	531	0.9091	1733	706
ED3042_20171011_oligo_Nuc_rDNA_005	5	47	45	212	667	2680	1094.1	1	1	19	451	108.45	687	0.3571	1842	1203
ED3042_20171011_oligo_Nuc_rDNA_005	5	47	46	213	684	2320	1104.7	2	1	14	443	85.28	601	0.4286	1887	290
ED3042_20171011_oligo_Nuc_rDNA_005	5	47	46	213	684	2320	1104.7	2	2	14	517	126.71	715	0.7143	1899	289
ED3042_20171011_oligo_Nuc_rDNA_006	6	44	1	215	391	2470	1096.3	2	1	17	364	76.67	515	0.5	61	1600
ED3042_20171011_oligo_Nuc_rDNA_006	6	44	1	215	391	2470	1096.3	2	2	16	384	90.33	527	0.6	66	1592
ED3042_20171011_oligo_Nuc_rDNA_006	6	44	2	216	473	2230	716.8	2	1	19	437	106.89	634	0.5	78	1333
ED3042_20171011_oligo_Nuc_rDNA_006	6	44	2	216	473	2230	716.8	2	2	17	394	72.12	520	0.4167	85	1338
ED3042_20171011_oligo_Nuc_rDNA_006	6	44	3	217	587	2450	894.5	2	1	18	403	109.89	593	0.3846	87	1248
ED3042_20171011_oligo_Nuc_rDNA_006	6	44	3	217	587	2450	894.5	2	2	18	376	78.51	496	0.6923	99	1252
ED3042_20171011_oligo_Nuc_rDNA_006	6	44	4	218	468	2070	686.1	2	1	19	419	99.02	572	0.1667	234	31
ED3042_20171011_oligo_Nuc_rDNA_006	6	44	4	218	468	2070	686.1	2	2	19	427	94.95	629	0.4167	243	32
ED3042_20171011_oligo_Nuc_rDNA_006	6	44	5	219	528	2250	995.1	2	1	17	484	93.58	623	0.7692	241	763
ED3042_20171011_oligo_Nuc_rDNA_006	6	44	5	219	528	2250	995.1	2	2	14	467	69.5	574	0.4615	247	759
ED3042_20171011_oligo_Nuc_rDNA_006	6	44	6	220	452	2190	728.1	2	1	15	395	93.34	625	0.7273	285	1977
ED3042_20171011_oligo_Nuc_rDNA_006	6	44	6	220	452	2190	728.1	2	2	14	424	104.03	588	0.1818	291	1973
ED3042_20171011_oligo_Nuc_rDNA_006	6	44	7	221	777	2530	1229.8	2	1	19	460	121.35	689	0.5333	367	1514
ED3042_20171011_oligo_Nuc_rDNA_006	6	44	7	221	777	2530	1229.8	2	2	19	455	125.94	723	0.4	380	1512
ED3042_20171011_oligo_Nuc_rDNA_006	6	44	9	223	497	2480	1051	2	1	18	448	105.32	663	0.3333	513	1542
ED3042_20171011_oligo_Nuc_rDNA_006	6	44	9	223	497	2480	1051	2	2	14	444	84.59	625	0.75	518	1546
ED3042_20171011_oligo_Nuc_rDNA_006	6	44	11	225	679	2240	1068.1	1	1	22	611	191.2	995	0.4286	585	551
ED3042_20171011_oligo_Nuc_rDNA_006	6	44	12	226	868	2510	1232	2	1	19	405	102.93	589	0.75	662	1215
ED3042_20171011_oligo_Nuc_rDNA_006	6	44	12	226	868	2510	1232	2	2	17	429	109.96	622	0.6875	670	1218
ED3042_20171011_oligo_Nuc_rDNA_006	6	44	15	229	599	2160	697	1	1	19	453	109.02	703	0.5385	715	772
ED3042_20171011_oligo_Nuc_rDNA_006	6	44	16	230	673	1990	599.6	1	1	22	433	87.52	577	0.3846	734	806
ED3042_20171011_oligo_Nuc_rDNA_006	6	44	17	231	496	2400	879.5	2	1	17	342	65.15	456	0.5	733	276
ED3042_20171011_oligo_Nuc_rDNA_006	6	44	17	231	496	2400	879.5	2	2	15	313	61.64	404	0.3333	745	285
ED3042_20171011_oligo_Nuc_rDNA_006	6	44	18	232	616	2170	1230.9	1	1	22	681	212.63	1052	0.7692	779	816
ED3042_20171011_oligo_Nuc_rDNA_006	6	44	19	233	533	2610	1184.5	2	1	16	384	96.52	526	0.8333	838	442
ED3042_20171011_oligo_Nuc_rDNA_006	6	44	19	233	533	2610	1184.5	2	2	16	384	72.43	506	0.5833	844	446
ED3042_20171011_oligo_Nuc_rDNA_006	6	44	20	234	505	2540	1034.4	2	1	14	421	104.57	573	0.5	909	1650
ED3042_20171011_oligo_Nuc_rDNA_006	6	44	20	234	505	2540	1034.4	2	2	18	457	111.45	713	0.5	917	1650
ED3042_20171011_oligo_Nuc_rDNA_006	6	44	21	235	552	2320	763.7	2	1	18	431	103.85	643	0.2308	992	296
ED3042_20171011_oligo_Nuc_rDNA_006	6	44	21	235	552	2320	763.7	2	2	17	476	92.08	650	0.3077	1003	290
ED3042_20171011_oligo_Nuc_rDNA_006	6	44	22	236	648	2620	1002.6	1	1	35	480	104.97	765	0.3571	1016	1598
ED3042_20171011_oligo_Nuc_rDNA_006	6	44	23	237	532	2520	1151.5	2	1	17	368	70.9	476	0.8333	1009	1090
ED3042_20171011_oligo_Nuc_rDNA_006	6	44	23	237	532	2520	1151.5	2	2	12	370	74.7	464	0.3333	1017	1092
ED3042_20171011_oligo_Nuc_rDNA_006	6	44	24	238	553	2580	1279.7	1	1	20	517	127.34	782	0.6923	1004	641
ED3042_20171011_oligo_Nuc_rDNA_006	6	44	25	239	856	2470	1274.9	2	1	10	347	27.05	384	0.8125	1052	381
ED3042_20171011_oligo_Nuc_rDNA_006	6	44	25	239	856	2470	1274.9	2	2	19	503	145.4	781	0.4375	1059	379
ED3042_20171011_oligo_Nuc_rDNA_006	6	44	26	240	437	2650	1173.5	2	1	19	533	144.7	804	0.8182	1112	348
ED3042_20171011_oligo_Nuc_rDNA_006	6	44	26	240	437	2650	1173.5	2	2	12	421	106.68	540	0.4545	1113	342
ED3042_20171011_oligo_Nuc_rDNA_006	6	44	28	242	616	2590	1177.6	2	1	12	296	27.51	347	0.4286	1222	20
ED3042_20171011_oligo_Nuc_rDNA_006	6	44	28	242	616	2590	1177.6	2	2	18	371	91.92	502	0.5	1238	20
ED3042_20171011_oligo_Nuc_rDNA_006	6	44	29	243	791	2530	1030.5	1	1	21	428	63.72	528	0.6667	1231	631
ED3042_20171011_oligo_Nuc_rDNA_006	6	44	30	244	823	2510	1292.3	2	1	16	460	120.53	625	0.5	1258	1285
ED3042_20171011_oligo_Nuc_rDNA_006	6	44	30	244	823	2510	1292.3	2	2	16	498	143.48	798	0.4375	1262	1290
ED3042_20171011_oligo_Nuc_rDNA_006	6	44	31	245	423	2620	1053.2	2	1	15	392	92.86	561	0.3636	1337	224
ED3042_20171011_oligo_Nuc_rDNA_006	6	44	31	245	423	2620	1053.2	2	2	18	391	99.68	574	0.2727	1345	236
ED3042_20171011_oligo_Nuc_rDNA_006	6	44	32	246	534	2470	961.6	2	1	19	423	90.63	619	0.6667	1448	954
ED3042_20171011_oligo_Nuc_rDNA_006	6	44	32	246	534	2470	961.6	2	2	18	431	107.06	627	0.3333	1453	965
ED3042_20171011_oligo_Nuc_rDNA_006	6	44	34	248	490	2380	834.5	1	1	23	408	66.66	525	0.3333	1516	2001
ED3042_20171011_oligo_Nuc_rDNA_006	6	44	35	249	771	2570	1065.1	2	1	17	473	125.33	681	0.2	1526	789
ED3042_20171011_oligo_Nuc_rDNA_006	6	44	35	249	771	2570	1065.1	2	2	11	310	31.3	361	0.6667	1537	786
ED3042_20171011_oligo_Nuc_rDNA_006	6	44	36	250	876	2540	1216.8	2	1	20	431	115.94	682	0.3125	1546	232
ED3042_20171011_oligo_Nuc_rDNA_006	6	44	36	250	876	2540	1216.8	2	2	17	323	38.76	402	0.625	1558	229
ED3042_20171011_oligo_Nuc_rDNA_006	6	44	37	251	476	2440	1195.2	2	1	19	424	97.5	610	0.8333	1572	1471
ED3042_20171011_oligo_Nuc_rDNA_006	6	44	37	251	476	2440	1195.2	2	2	19	437	103.62	636	0.4167	1572	1480
ED3042_20171011_oligo_Nuc_rDNA_006	6	44	39	253	832	2590	1230.5	1	1	16	371	68.03	469	0.375	1664	1293
ED3042_20171011_oligo_Nuc_rDNA_006	6	44	41	255	748	2620	1194.9	2	1	21	483	139.41	719	0.4667	1704	1938
ED3042_20171011_oligo_Nuc_rDNA_006	6	44	41	255	748	2620	1194.9	2	2	21	405	105.24	624	0.4	1711	1922
ED3042_20171011_oligo_Nuc_rDNA_006	6	44	43	257	548	2460	1082.8	1	1	20	475	132.81	823	0.4167	1884	1183
ED3042_20171011_oligo_Nuc_rDNA_006	6	44	44	258	633	2500	920.4	2	1	16	425	113.48	636	0.5	1980	1464
ED3042_20171011_oligo_Nuc_rDNA_006	6	44	44	258	633	2500	920.4	2	2	18	431	110.22	640	0.5714	1981	1473
ED3042_20171011_oligo_Nuc_rDNA_007	7	30	1	259	463	2370	1063.4	2	1	17	372	90.81	560	0.4545	111	840
ED3042_20171011_oligo_Nuc_rDNA_007	7	30	1	259	463	2370	1063.4	2	2	21	406	107.69	641	0.7273	118	834
ED3042_20171011_oligo_Nuc_rDNA_007	7	30	3	261	518	2280	892	1	1	26	857	295.8	1545	0.3077	215	1401
ED3042_20171011_oligo_Nuc_rDNA_007	7	30	6	264	857	2490	1251.8	2	1	21	396	99.82	622	0.5625	390	1135
ED3042_20171011_oligo_Nuc_rDNA_007	7	30	6	264	857	2490	1251.8	2	2	22	485	138.92	734	0.75	402	1134
ED3042_20171011_oligo_Nuc_rDNA_007	7	30	7	265	517	2400	1004	2	1	20	458	121.75	652	0.5833	515	1545
ED3042_20171011_oligo_Nuc_rDNA_007	7	30	7	265	517	2400	1004	2	2	21	417	88.85	544	0.4167	520	1540
ED3042_20171011_oligo_Nuc_rDNA_007	7	30	8	266	716	2420	963.8	2	1	21	543	141.96	805	0.4667	608	910
ED3042_20171011_oligo_Nuc_rDNA_007	7	30	8	266	716	2420	963.8	2	2	22	512	133.61	739	0.4	609	904
ED3042_20171011_oligo_Nuc_rDNA_007	7	30	9	267	473	2350	1047.1	2	1	22	413	96.62	629	0.6667	606	1978
ED3042_20171011_oligo_Nuc_rDNA_007	7	30	9	267	473	2350	1047.1	2	2	21	408	104.48	618	0.4167	616	1973
ED3042_20171011_oligo_Nuc_rDNA_007	7	30	10	268	502	2440	1214.7	1	1	39	451	107.32	684	0.75	622	581
ED3042_20171011_oligo_Nuc_rDNA_007	7	30	11	269	455	2470	1121.4	1	1	30	614	149.9	896	0.5455	661	1823
ED3042_20171011_oligo_Nuc_rDNA_007	7	30	14	272	498	2360	902.3	2	1	22	523	158.42	844	0.4545	858	631
ED3042_20171011_oligo_Nuc_rDNA_007	7	30	14	272	498	2360	902.3	2	2	21	411	113.03	615	0.5455	858	642
ED3042_20171011_oligo_Nuc_rDNA_007	7	30	15	273	896	2520	1218.2	2	1	26	542	169.21	855	0.5625	913	230
ED3042_20171011_oligo_Nuc_rDNA_007	7	30	15	273	896	2520	1218.2	2	2	25	629	239	1203	0.375	923	242
ED3042_20171011_oligo_Nuc_rDNA_007	7	30	16	274	672	2490	1274.3	2	1	21	389	105.82	578	0.5	916	943
ED3042_20171011_oligo_Nuc_rDNA_007	7	30	16	274	672	2490	1274.3	2	2	20	516	157.52	852	0.8571	920	952
ED3042_20171011_oligo_Nuc_rDNA_007	7	30	17	275	491	2460	1012.3	2	1	20	379	95.87	569	0.5455	993	573
ED3042_20171011_oligo_Nuc_rDNA_007	7	30	17	275	491	2460	1012.3	2	2	21	433	121.27	671	0.5455	1002	578
ED3042_20171011_oligo_Nuc_rDNA_007	7	30	19	277	477	2410	1112.2	1	1	37	393	87.9	626	0.5833	1257	1995
ED3042_20171011_oligo_Nuc_rDNA_007	7	30	20	278	577	2480	1276.4	2	1	20	374	111.09	577	0.6154	1480	800
ED3042_20171011_oligo_Nuc_rDNA_007	7	30	20	278	577	2480	1276.4	2	2	22	380	99.04	594	0.6154	1481	812
ED3042_20171011_oligo_Nuc_rDNA_007	7	30	21	279	458	2360	1013.3	1	1	33	444	110	630	0.6667	1491	152
ED3042_20171011_oligo_Nuc_rDNA_007	7	30	22	280	509	2360	1267	1	1	31	514	129.11	776	0.6667	1527	648
ED3042_20171011_oligo_Nuc_rDNA_007	7	30	24	282	510	2390	1208.6	2	1	18	400	93.42	540	0.5	1650	1817
ED3042_20171011_oligo_Nuc_rDNA_007	7	30	24	282	510	2390	1208.6	2	2	19	394	84.7	561	0.5833	1656	1818
ED3042_20171011_oligo_Nuc_rDNA_007	7	30	25	283	891	2340	1263.1	2	1	22	464	141.38	793	0.8125	1661	1257
ED3042_20171011_oligo_Nuc_rDNA_007	7	30	25	283	891	2340	1263.1	2	2	21	462	127.48	731	0.5	1666	1266
ED3042_20171011_oligo_Nuc_rDNA_007	7	30	26	284	530	2110	769.1	2	1	21	477	153.94	732	0.1667	1695	547
ED3042_20171011_oligo_Nuc_rDNA_007	7	30	26	284	530	2110	769.1	2	2	21	483	153.3	790	0.25	1699	562
ED3042_20171011_oligo_Nuc_rDNA_007	7	30	28	286	478	2150	727.5	2	1	21	371	98.96	542	0.6364	1787	294
ED3042_20171011_oligo_Nuc_rDNA_007	7	30	28	286	478	2150	727.5	2	2	18	329	67.44	470	0.5455	1790	302
ED3042_20171011_oligo_Nuc_rDNA_007	7	30	29	287	478	2330	1000.8	2	1	20	398	104.21	586	0.3333	1847	551
ED3042_20171011_oligo_Nuc_rDNA_007	7	30	29	287	478	2330	1000.8	2	2	22	428	124.99	673	0.4167	1851	538
ED3042_20171011_oligo_Nuc_rDNA_007	7	30	30	288	468	2240	833.8	2	1	20	417	103.7	667	0.6364	1875	1964
ED3042_20171011_oligo_Nuc_rDNA_007	7	30	30	288	468	2240	833.8	2	2	21	426	100.24	620	0.3636	1880	1958
ED3042_20171011_oligo_Nuc_rDNA_008	8	39	1	289	534	2280	1193.2	1	1	23	517	135.05	785	0.5833	99	1228
ED3042_20171011_oligo_Nuc_rDNA_008	8	39	2	290	560	2500	995.3	2	1	16	379	65.23	492	0.5385	111	1740
ED3042_20171011_oligo_Nuc_rDNA_008	8	39	2	290	560	2500	995.3	2	2	19	411	86.33	591	0.3077	116	1725
ED3042_20171011_oligo_Nuc_rDNA_008	8	39	3	291	846	2310	1239.9	2	1	20	391	71.1	512	0.625	167	1292
ED3042_20171011_oligo_Nuc_rDNA_008	8	39	3	291	846	2310	1239.9	2	2	21	409	101.42	606	0.5	179	1290
ED3042_20171011_oligo_Nuc_rDNA_008	8	39	6	294	455	2330	907	2	1	18	411	94.45	548	0.25	253	406
ED3042_20171011_oligo_Nuc_rDNA_008	8	39	6	294	455	2330	907	2	2	19	369	89.53	507	0.5	257	392
ED3042_20171011_oligo_Nuc_rDNA_008	8	39	7	295	608	2520	1156.1	2	1	17	399	96.79	609	0.6154	268	1070
ED3042_20171011_oligo_Nuc_rDNA_008	8	39	7	295	608	2520	1156.1	2	2	17	462	133.1	747	0.6923	273	1076
ED3042_20171011_oligo_Nuc_rDNA_008	8	39	8	296	860	2470	1224.1	2	1	14	391	96.61	580	0.625	292	1559
ED3042_20171011_oligo_Nuc_rDNA_008	8	39	8	296	860	2470	1224.1	2	2	18	456	98.29	611	0.9375	298	1555
ED3042_20171011_oligo_Nuc_rDNA_008	8	39	10	298	477	2510	1219	2	1	16	401	97.54	561	0.6667	424	850
ED3042_20171011_oligo_Nuc_rDNA_008	8	39	10	298	477	2510	1219	2	2	17	368	101.04	573	0.4167	434	843
ED3042_20171011_oligo_Nuc_rDNA_008	8	39	13	301	391	2340	985.2	1	1	12	349	22.68	388	0.2727	607	851
ED3042_20171011_oligo_Nuc_rDNA_008	8	39	15	303	691	2460	1105.5	2	1	16	491	141.53	735	0.5714	756	782
ED3042_20171011_oligo_Nuc_rDNA_008	8	39	15	303	691	2460	1105.5	2	2	15	434	110.22	627	0.7857	762	781
ED3042_20171011_oligo_Nuc_rDNA_008	8	39	17	305	478	2500	1197	2	1	16	302	58.87	421	0.5455	795	645
ED3042_20171011_oligo_Nuc_rDNA_008	8	39	17	305	478	2500	1197	2	2	13	295	41.43	356	0.5455	802	653
ED3042_20171011_oligo_Nuc_rDNA_008	8	39	18	306	496	2470	1107.4	1	1	29	382	73.18	532	0.5	951	105
ED3042_20171011_oligo_Nuc_rDNA_008	8	39	19	307	488	2550	1151.8	1	1	21	514	160.13	834	0.5833	998	1909
ED3042_20171011_oligo_Nuc_rDNA_008	8	39	20	308	799	2520	1271.2	1	1	35	508	144.33	781	0.5625	1054	1390
ED3042_20171011_oligo_Nuc_rDNA_008	8	39	21	309	770	2590	1156.1	2	1	19	511	149.12	885	0.7333	1061	1086
ED3042_20171011_oligo_Nuc_rDNA_008	8	39	21	309	770	2590	1156.1	2	2	20	524	156.92	836	0.6	1069	1079
ED3042_20171011_oligo_Nuc_rDNA_008	8	39	23	311	593	2550	1259.7	2	1	21	428	125.67	742	0.3846	1272	1080
ED3042_20171011_oligo_Nuc_rDNA_008	8	39	23	311	593	2550	1259.7	2	2	17	390	73.11	535	1	1279	1074
ED3042_20171011_oligo_Nuc_rDNA_008	8	39	24	312	559	2510	1076.4	2	1	18	438	118.82	634	0.5	1395	759
ED3042_20171011_oligo_Nuc_rDNA_008	8	39	24	312	559	2510	1076.4	2	2	18	413	114.38	620	0.3333	1398	749
ED3042_20171011_oligo_Nuc_rDNA_008	8	39	25	313	756	2450	1277.3	1	1	30	541	121.43	733	0.7333	1426	1540
ED3042_20171011_oligo_Nuc_rDNA_008	8	39	28	316	635	2480	1239.3	1	1	33	458	102.51	692	0.5	1585	1680
ED3042_20171011_oligo_Nuc_rDNA_008	8	39	29	317	869	2550	1231.7	2	1	18	548	154.99	857	0.375	1604	1867
ED3042_20171011_oligo_Nuc_rDNA_008	8	39	29	317	869	2550	1231.7	2	2	16	510	110.02	673	0.625	1610	1863
ED3042_20171011_oligo_Nuc_rDNA_008	8	39	30	318	741	2510	1265.2	2	1	21	474	145.51	753	0.4	1621	1254
ED3042_20171011_oligo_Nuc_rDNA_008	8	39	30	318	741	2510	1265.2	2	2	19	464	133.76	664	0.4667	1636	1251
ED3042_20171011_oligo_Nuc_rDNA_008	8	39	32	320	465	2350	1130.3	2	1	13	315	54.25	415	0.5455	1706	254
ED3042_20171011_oligo_Nuc_rDNA_008	8	39	32	320	465	2350	1130.3	2	2	11	304	40.15	361	0.9091	1711	251
ED3042_20171011_oligo_Nuc_rDNA_008	8	39	33	321	834	2500	1186.4	2	1	19	501	132.77	734	0.625	1731	590
ED3042_20171011_oligo_Nuc_rDNA_008	8	39	33	321	834	2500	1186.4	2	2	21	534	155.91	868	0.4375	1740	589
ED3042_20171011_oligo_Nuc_rDNA_008	8	39	35	323	583	2530	1181.9	1	1	34	424	106.46	633	0.4615	1762	1352
ED3042_20171011_oligo_Nuc_rDNA_008	8	39	36	324	854	2520	1220.7	2	1	18	496	128.11	727	0.5	1815	1428
ED3042_20171011_oligo_Nuc_rDNA_008	8	39	36	324	854	2520	1220.7	2	2	20	470	111.83	718	0.8125	1824	1436
ED3042_20171011_oligo_Nuc_rDNA_008	8	39	37	325	512	2390	1099.9	2	1	15	447	119.63	664	0.5	1895	489
ED3042_20171011_oligo_Nuc_rDNA_008	8	39	37	325	512	2390	1099.9	2	2	20	527	156.11	825	0.75	1900	493
ED3042_20171011_oligo_Nuc_rDNA_009	9	37	2	329	579	2340	812.8	1	1	19	512	131.03	713	1	95	1703
ED3042_20171011_oligo_Nuc_rDNA_009	9	37	3	330	568	2460	1167.5	2	1	14	456	80.12	580	0.8462	110	664
ED3042_20171011_oligo_Nuc_rDNA_009	9	37	3	330	568	2460	1167.5	2	2	14	395	66.65	539	0.6923	117	664
ED3042_20171011_oligo_Nuc_rDNA_009	9	37	4	331	529	2540	1238.8	2	1	19	418	114.35	651	0.9167	176	1487
ED3042_20171011_oligo_Nuc_rDNA_009	9	37	4	331	529	2540	1238.8	2	2	15	399	86.2	565	0.5833	183	1489
ED3042_20171011_oligo_Nuc_rDNA_009	9	37	5	332	423	2650	1205.4	2	1	16	373	100.43	577	0.6364	210	890
ED3042_20171011_oligo_Nuc_rDNA_009	9	37	5	332	423	2650	1205.4	2	2	19	339	78.32	458	0.5455	213	880
ED3042_20171011_oligo_Nuc_rDNA_009	9	37	6	333	747	1700	635.8	0	NaN	NaN	NaN	NaN	NaN	NaN	NaN	NaN
ED3042_20171011_oligo_Nuc_rDNA_009	9	37	7	334	524	2410	1200	2	1	15	369	60.43	496	0.5833	220	543
ED3042_20171011_oligo_Nuc_rDNA_009	9	37	7	334	524	2410	1200	2	2	16	404	83	574	0.6667	228	535
ED3042_20171011_oligo_Nuc_rDNA_009	9	37	11	338	566	2590	1260.5	1	1	31	425	99.82	642	0.6923	555	715
ED3042_20171011_oligo_Nuc_rDNA_009	9	37	12	339	517	2650	1222.5	2	1	13	330	67.98	451	0.8333	567	473
ED3042_20171011_oligo_Nuc_rDNA_009	9	37	12	339	517	2650	1222.5	2	2	15	374	81.33	546	0.6667	574	471
ED3042_20171011_oligo_Nuc_rDNA_009	9	37	13	340	409	2620	1116.4	2	1	14	300	49.67	367	0.2727	639	563
ED3042_20171011_oligo_Nuc_rDNA_009	9	37	13	340	409	2620	1116.4	2	2	14	323	51.7	417	0.4545	641	549
ED3042_20171011_oligo_Nuc_rDNA_009	9	37	17	344	656	2420	1235	1	1	19	631	189.68	939	0.5385	834	2018
ED3042_20171011_oligo_Nuc_rDNA_009	9	37	18	345	471	2610	1210.8	2	1	19	420	119.59	645	0.5	872	142
ED3042_20171011_oligo_Nuc_rDNA_009	9	37	18	345	471	2610	1210.8	2	2	14	366	59.73	485	0.6667	879	145
ED3042_20171011_oligo_Nuc_rDNA_009	9	37	21	348	567	2610	1150.9	1	1	25	557	144.62	845	0.6154	1133	1870
ED3042_20171011_oligo_Nuc_rDNA_009	9	37	22	349	573	2550	1003.5	2	1	18	393	91.01	563	0.4615	1171	2003
ED3042_20171011_oligo_Nuc_rDNA_009	9	37	22	349	573	2550	1003.5	2	2	17	444	108.11	636	0.4615	1181	1991
ED3042_20171011_oligo_Nuc_rDNA_009	9	37	23	350	665	2490	1013.5	2	1	20	408	75.07	554	0.3571	1182	1361
ED3042_20171011_oligo_Nuc_rDNA_009	9	37	23	350	665	2490	1013.5	2	2	18	450	108.06	646	0.7143	1185	1347
ED3042_20171011_oligo_Nuc_rDNA_009	9	37	26	353	547	2770	1185.7	1	1	25	444	101.48	655	0.5385	1328	926
ED3042_20171011_oligo_Nuc_rDNA_009	9	37	28	355	484	2670	1234.6	1	1	23	558	182.74	913	0.75	1367	501
ED3042_20171011_oligo_Nuc_rDNA_009	9	37	29	356	766	2670	1228.3	2	1	19	489	133.91	689	0.5333	1406	227
ED3042_20171011_oligo_Nuc_rDNA_009	9	37	29	356	766	2670	1228.3	2	2	15	424	84.47	548	0.4667	1413	230
ED3042_20171011_oligo_Nuc_rDNA_009	9	37	30	357	475	2740	1244.9	2	1	15	327	63.82	436	0.75	1463	1121
ED3042_20171011_oligo_Nuc_rDNA_009	9	37	30	357	475	2740	1244.9	2	2	17	362	65.34	469	0.6667	1470	1125
ED3042_20171011_oligo_Nuc_rDNA_009	9	37	33	360	882	2560	1262.8	2	1	22	441	113.45	656	0.375	1658	645
ED3042_20171011_oligo_Nuc_rDNA_009	9	37	33	360	882	2560	1262.8	2	2	20	512	158.18	769	0.875	1669	639
ED3042_20171011_oligo_Nuc_rDNA_009	9	37	34	361	570	2540	1203.4	2	1	19	410	102.99	598	0.3077	1862	1827
ED3042_20171011_oligo_Nuc_rDNA_009	9	37	34	361	570	2540	1203.4	2	2	20	389	84.87	561	0.6154	1868	1820
ED3042_20171011_oligo_Nuc_rDNA_009	9	37	35	362	765	2590	1239.2	2	1	21	438	125.25	695	0.5333	1919	1228
ED3042_20171011_oligo_Nuc_rDNA_009	9	37	35	362	765	2590	1239.2	2	2	18	417	101.16	604	0.5333	1930	1228
ED3042_20171011_oligo_Nuc_rDNA_009	9	37	36	363	533	2570	1046.5	1	1	32	425	95.76	642	0.5833	1928	502

## Sheet: JU775_Rep1
DatasetName	ImageIndex	TotalCellCount	CellIndex	GlobalCellIndex	NuclearSize	AvgNuclearIntensity	std_NuclearIntensity	Cy5_NumSpotsPerCell	Cy5_SpotIndex	Cy5_SpotSize	Cy5_MeanSpotIntensity	Cy5_std_SpotIntensity	Cy5_MaxSpotIntensity	Cy5_SpotRRD	Cy5_Spot_centroidX	Cy5_Spot_centroidY
1	1	199	1	1	895	839.293	162.4	0	NaN	NaN	NaN	NaN	NaN	NaN	NaN	NaN
1	1	199	2	2	998	1194.17	674.6	0	NaN	NaN	NaN	NaN	NaN	NaN	NaN	NaN
1	1	199	3	3	814	959.435	219.1	1	1	9	1419	299.05	1805	0.5	54	1847
1	1	199	4	4	885	1078.83	462.6	2	1	10	1376	286.61	1756	0.625	75	561
1	1	199	4	4	885	1078.83	462.6	2	2	9	1397	298.38	1883	0.5625	80	552
1	1	199	5	5	637	949.179	289.7	0	NaN	NaN	NaN	NaN	NaN	NaN	NaN	NaN
1	1	199	6	6	1617	941.266	235	2	1	15	1777	392.92	2487	0.2632	93	1075
1	1	199	6	6	1617	941.266	235	2	2	15	1781	470.23	2636	0.3684	98	1045
1	1	199	7	7	1854	1021.62	367.3	3	1	16	1679	457.89	2434	0.4211	114	690
1	1	199	7	7	1854	1021.62	367.3	3	2	10	1433	324.17	1809	0.4737	134	682
1	1	199	7	7	1854	1021.62	367.3	3	3	14	1707	419.97	2289	0.4737	146	702
1	1	199	8	8	2539	883.978	221.2	2	1	9	1499	270.13	1838	0.1579	106	1735
1	1	199	8	8	2539	883.978	221.2	2	2	9	1461	265.11	1761	0.5263	134	1734
1	1	199	9	9	996	1021.8	378	0	NaN	NaN	NaN	NaN	NaN	NaN	NaN	NaN
1	1	199	10	10	1066	1004.13	328.5	1	1	10	1310	271.16	1718	0.5625	131	1576
1	1	199	11	11	938	962.974	343.2	0	NaN	NaN	NaN	NaN	NaN	NaN	NaN	NaN
1	1	199	12	12	890	1004.32	325.1	2	1	12	1548	405.57	2258	0.8	135	249
1	1	199	12	12	890	1004.32	325.1	2	2	9	1231	246.08	1636	0.4	141	238
1	1	199	13	13	786	929.366	244.1	0	NaN	NaN	NaN	NaN	NaN	NaN	NaN	NaN
1	1	199	14	14	887	899.241	167.9	0	NaN	NaN	NaN	NaN	NaN	NaN	NaN	NaN
1	1	199	15	15	982	1036.35	384.1	1	1	18	2014	437.15	2736	0.4706	179	333
1	1	199	16	16	820	924.657	198.5	0	NaN	NaN	NaN	NaN	NaN	NaN	NaN	NaN
1	1	199	17	17	2302	1203.04	565.4	1	1	10	1304	159.07	1566	0.6667	192	615
1	1	199	18	18	1580	1003.46	312.8	0	NaN	NaN	NaN	NaN	NaN	NaN	NaN	NaN
1	1	199	19	19	851	955.248	299.4	0	NaN	NaN	NaN	NaN	NaN	NaN	NaN	NaN
1	1	199	20	20	1144	963.904	256.5	1	1	15	2075	534.85	3069	0.6111	228	328
1	1	199	21	21	905	1082.07	451.9	0	NaN	NaN	NaN	NaN	NaN	NaN	NaN	NaN
1	1	199	22	22	1192	1067.44	390.9	0	NaN	NaN	NaN	NaN	NaN	NaN	NaN	NaN
1	1	199	23	23	828	949.307	240.5	0	NaN	NaN	NaN	NaN	NaN	NaN	NaN	NaN
1	1	199	24	24	1225	940.012	239.7	0	NaN	NaN	NaN	NaN	NaN	NaN	NaN	NaN
1	1	199	25	25	957	1049.77	378.5	2	1	11	1522	357.39	1910	0.8235	278	1332
1	1	199	25	25	957	1049.77	378.5	2	2	11	1544	300.99	1916	0.4118	286	1331
1	1	199	26	26	610	987.064	331.3	1	1	12	1384	319.93	1932	0.75	294	1239
1	1	199	27	27	2594	1078.6	468.2	0	NaN	NaN	NaN	NaN	NaN	NaN	NaN	NaN
1	1	199	28	28	999	781.929	154.3	0	NaN	NaN	NaN	NaN	NaN	NaN	NaN	NaN
1	1	199	29	29	1422	933.897	248.5	0	NaN	NaN	NaN	NaN	NaN	NaN	NaN	NaN
1	1	199	30	30	1087	1038.28	389.2	0	NaN	NaN	NaN	NaN	NaN	NaN	NaN	NaN
1	1	199	31	31	1196	1005.42	404.7	0	NaN	NaN	NaN	NaN	NaN	NaN	NaN	NaN
1	1	199	32	32	688	996.715	385.8	0	NaN	NaN	NaN	NaN	NaN	NaN	NaN	NaN
1	1	199	33	33	1386	942.528	314.7	0	NaN	NaN	NaN	NaN	NaN	NaN	NaN	NaN
1	1	199	34	34	1045	1064.26	423.4	1	1	15	1667	383.14	2277	0.375	409	1713
1	1	199	35	35	1144	834.593	186	2	1	11	1366	347.28	1844	0.2222	395	1275
1	1	199	35	35	1144	834.593	186	2	2	13	1380	299.99	1841	0.4444	416	1293
1	1	199	36	36	1109	931.368	218.6	0	NaN	NaN	NaN	NaN	NaN	NaN	NaN	NaN
1	1	199	37	37	1512	1013.93	358.3	0	NaN	NaN	NaN	NaN	NaN	NaN	NaN	NaN
1	1	199	38	38	2255	944.06	259.5	1	1	11	1458	235.85	1758	0.7391	435	1426
1	1	199	39	39	1117	910.086	224	1	1	9	1426	250.27	1753	0.625	429	338
1	1	199	40	40	1870	783.002	165.3	0	NaN	NaN	NaN	NaN	NaN	NaN	NaN	NaN
1	1	199	41	41	2305	1130.9	491.9	0	NaN	NaN	NaN	NaN	NaN	NaN	NaN	NaN
1	1	199	42	42	696	908.065	270.5	0	NaN	NaN	NaN	NaN	NaN	NaN	NaN	NaN
1	1	199	43	43	697	890.29	187.6	0	NaN	NaN	NaN	NaN	NaN	NaN	NaN	NaN
1	1	199	44	44	880	923.108	182.5	2	1	13	1554	357.77	2146	0.2143	483	174
1	1	199	44	44	880	923.108	182.5	2	2	10	1392	302.12	1741	0.5	492	187
1	1	199	45	45	760	991.255	345	0	NaN	NaN	NaN	NaN	NaN	NaN	NaN	NaN
1	1	199	46	46	656	1056.46	560.6	0	NaN	NaN	NaN	NaN	NaN	NaN	NaN	NaN
1	1	199	47	47	956	1220.68	691.7	2	1	17	1821	501.4	2655	0.625	521	393
1	1	199	47	47	956	1220.68	691.7	2	2	16	1686	395.63	2332	0.6875	523	404
1	1	199	48	48	1028	1046.41	382.2	1	1	19	1829	311.78	2332	0.9412	523	761
1	1	199	49	49	811	919.587	177.3	0	NaN	NaN	NaN	NaN	NaN	NaN	NaN	NaN
1	1	199	50	50	1300	907.782	227.6	2	1	17	2190	626.42	3517	0.3684	547	698
1	1	199	50	50	1300	907.782	227.6	2	2	14	1713	430.09	2441	0.3158	557	713
1	1	199	51	51	1725	858.42	236.4	1	1	9	1323	243.3	1614	0.45	596	1269
1	1	199	52	52	738	1007.17	331	2	1	14	1599	427.09	2293	0.5333	582	1920
1	1	199	52	52	738	1007.17	331	2	2	12	1554	335.1	2062	0.4667	592	1912
1	1	199	53	53	855	959.832	300.5	0	NaN	NaN	NaN	NaN	NaN	NaN	NaN	NaN
1	1	199	54	54	1788	1270.17	611.7	0	NaN	NaN	NaN	NaN	NaN	NaN	NaN	NaN
1	1	199	55	55	2141	1140.02	486.5	0	NaN	NaN	NaN	NaN	NaN	NaN	NaN	NaN
1	1	199	56	56	1712	736.504	146.2	2	1	10	1610	220.2	1934	0.5625	623	572
1	1	199	56	56	1712	736.504	146.2	2	2	9	1613	417.8	2183	0.0625	649	587
1	1	199	57	57	1359	1077.67	462.8	1	1	19	2415	757.32	3805	0.5263	660	1781
1	1	199	58	58	622	970.381	286.7	2	1	11	1787	430.73	2365	0.3846	638	1125
1	1	199	58	58	622	970.381	286.7	2	2	9	1635	369.58	2056	0.7692	645	1124
1	1	199	59	59	1368	995.593	374.3	0	NaN	NaN	NaN	NaN	NaN	NaN	NaN	NaN
1	1	199	60	60	1444	1051.13	427.4	2	1	14	1677	531.22	2403	0.625	701	863
1	1	199	60	60	1444	1051.13	427.4	2	2	16	1893	518.83	2823	0.625	710	865
1	1	199	61	61	787	862.656	124.7	0	NaN	NaN	NaN	NaN	NaN	NaN	NaN	NaN
1	1	199	62	62	1941	971.116	341.1	2	1	15	2424	726.86	3829	0.6	723	125
1	1	199	62	62	1941	971.116	341.1	2	2	9	1437	239.85	1704	0.75	727	145
1	1	199	63	63	630	978.105	342.1	0	NaN	NaN	NaN	NaN	NaN	NaN	NaN	NaN
1	1	199	64	64	1634	1130.01	474.4	0	NaN	NaN	NaN	NaN	NaN	NaN	NaN	NaN
1	1	199	65	65	636	1018.55	427	0	NaN	NaN	NaN	NaN	NaN	NaN	NaN	NaN
1	1	199	66	66	1336	985.49	325.8	3	1	13	1412	381.51	2015	0.6667	763	544
1	1	199	66	66	1336	985.49	325.8	3	2	10	1430	373.04	1886	0.3333	772	553
1	1	199	66	66	1336	985.49	325.8	3	3	9	1380	299.7	1892	0.4	786	524
1	1	199	67	67	1007	1094.59	476.4	0	NaN	NaN	NaN	NaN	NaN	NaN	NaN	NaN
1	1	199	68	68	1003	1116.18	566.6	2	1	11	1754	395.33	2256	0.7059	798	1253
1	1	199	68	68	1003	1116.18	566.6	2	2	15	1798	509.51	2635	0.8235	803	1244
1	1	199	69	69	1080	1282.63	803.1	0	NaN	NaN	NaN	NaN	NaN	NaN	NaN	NaN
1	1	199	70	70	1055	1243.27	721.1	0	NaN	NaN	NaN	NaN	NaN	NaN	NaN	NaN
1	1	199	71	71	1002	1120.74	623.6	0	NaN	NaN	NaN	NaN	NaN	NaN	NaN	NaN
1	1	199	72	72	1298	1110.15	532.4	1	1	9	1363	239.69	1649	0.75	833	1158
1	1	199	73	73	922	1074.86	431.3	0	NaN	NaN	NaN	NaN	NaN	NaN	NaN	NaN
1	1	199	74	74	2144	994.678	288.1	0	NaN	NaN	NaN	NaN	NaN	NaN	NaN	NaN
1	1	199	75	75	1226	1063.95	460.5	0	NaN	NaN	NaN	NaN	NaN	NaN	NaN	NaN
1	1	199	76	76	2011	1009.54	300.7	1	1	12	1618	269.26	2065	0.5	887	1250
1	1	199	77	77	1207	1021.77	336	4	1	10	1411	334.25	1860	0.1875	855	1811
1	1	199	77	77	1207	1021.77	336	4	2	11	1266	340.67	1833	0.625	864	1792
1	1	199	77	77	1207	1021.77	336	4	3	9	1231	240.07	1570	0.375	868	1808
1	1	199	77	77	1207	1021.77	336	4	4	13	1599	430.72	2434	0.375	881	1791
1	1	199	78	78	1665	870.838	182	1	1	11	1411	254.78	1844	0.4	892	1462
1	1	199	79	79	2156	987.101	330	0	NaN	NaN	NaN	NaN	NaN	NaN	NaN	NaN
1	1	199	80	80	1452	966.832	250.1	0	NaN	NaN	NaN	NaN	NaN	NaN	NaN	NaN
1	1	199	81	81	725	942.505	311.2	0	NaN	NaN	NaN	NaN	NaN	NaN	NaN	NaN
1	1	199	82	82	1850	1113.1	487.5	0	NaN	NaN	NaN	NaN	NaN	NaN	NaN	NaN
1	1	199	83	83	630	1016.98	380	1	1	10	1366	251	1732	0.9231	934	696
1	1	199	84	84	663	940.27	228.7	0	NaN	NaN	NaN	NaN	NaN	NaN	NaN	NaN
1	1	199	85	85	1964	981.121	352.2	1	1	18	2077	610.07	3155	0.625	961	826
1	1	199	86	86	1385	834.377	148.5	1	1	9	1399	162.53	1683	0.7222	963	22
1	1	199	87	87	947	804.873	101.7	1	1	12	1753	404.68	2335	0.125	969	1409
1	1	199	88	88	1359	839.108	187.3	2	1	17	2048	590.46	3020	0.2105	968	2005
1	1	199	88	88	1359	839.108	187.3	2	2	10	1710	362.07	2162	0.5789	971	2024
1	1	199	89	89	1062	1091.51	539.6	1	1	12	1494	277.46	1924	0.8824	961	882
1	1	199	90	90	974	999.294	368.8	0	NaN	NaN	NaN	NaN	NaN	NaN	NaN	NaN
1	1	199	91	91	841	990.189	306.3	1	1	9	1546	305.89	2069	0.6	971	90
1	1	199	92	92	1345	1009.75	345.4	0	NaN	NaN	NaN	NaN	NaN	NaN	NaN	NaN
1	1	199	93	93	1428	1012.09	322.8	1	1	10	1476	270.12	1850	0.8421	987	633
1	1	199	94	94	1121	1073.16	414.3	1	1	15	1559	212.28	1977	0.625	989	1170
1	1	199	95	95	1497	1097.69	499.1	1	1	13	1509	327.91	1963	0.7647	992	527
1	1	199	96	96	625	965.205	316	1	1	9	1363	313.78	1803	0.5385	982	286
1	1	199	97	97	652	967.42	382.1	2	1	10	1309	282.97	1764	0.5385	987	660
1	1	199	97	97	652	967.42	382.1	2	2	12	1410	317.47	1927	0.8462	988	672
1	1	199	98	98	1009	1085.18	457.1	1	1	9	1182	160.52	1399	0.625	1004	1064
1	1	199	99	99	1261	894.991	351.3	2	1	11	1723	342.61	2212	0.4667	1029	1376
1	1	199	99	99	1261	894.991	351.3	2	2	13	1473	343.16	2010	0.6	1029	1386
1	1	199	100	100	660	1062.25	491.7	1	1	11	1496	322.17	2087	0.6429	1033	845
1	1	199	101	101	2256	1057.49	373.7	1	1	14	1817	413.93	2592	0.5455	1072	612
1	1	199	102	102	1290	934.884	197	0	NaN	NaN	NaN	NaN	NaN	NaN	NaN	NaN
1	1	199	103	103	838	1009.23	433.7	0	NaN	NaN	NaN	NaN	NaN	NaN	NaN	NaN
1	1	199	104	104	1099	911.228	163.5	0	NaN	NaN	NaN	NaN	NaN	NaN	NaN	NaN
1	1	199	105	105	1898	1098.07	417.8	1	1	9	1371	226.68	1746	0.6	1078	497
1	1	199	106	106	2500	852.338	329.6	3	1	9	1400	299.5	1837	0.5	1102	814
1	1	199	106	106	2500	852.338	329.6	3	2	12	1431	399.13	2068	0.375	1109	822
1	1	199	106	106	2500	852.338	329.6	3	3	13	1789	437.93	2571	0.5	1140	794
1	1	199	107	107	2595	1021.2	398.7	4	1	14	1731	485.23	2410	0.6522	1122	249
1	1	199	107	107	2595	1021.2	398.7	4	2	11	1690	371.99	2297	0.5652	1129	270
1	1	199	107	107	2595	1021.2	398.7	4	3	10	1786	367.38	2243	0.4348	1132	276
1	1	199	107	107	2595	1021.2	398.7	4	4	14	1870	386.98	2381	0.8696	1134	256
1	1	199	108	108	908	1040.2	411.4	2	1	15	2150	587.27	3142	0.4375	1135	1310
1	1	199	108	108	908	1040.2	411.4	2	2	12	1795	486.87	2505	0.8125	1137	1304
1	1	199	109	109	1032	835.102	136.6	0	NaN	NaN	NaN	NaN	NaN	NaN	NaN	NaN
1	1	199	110	110	1423	1071.47	396	0	NaN	NaN	NaN	NaN	NaN	NaN	NaN	NaN
1	1	199	111	111	2158	1178.52	613.9	4	1	11	1606	249.89	1889	0.5238	1138	1468
1	1	199	111	111	2158	1178.52	613.9	4	2	9	1519	298.22	1942	0.8095	1144	1472
1	1	199	111	111	2158	1178.52	613.9	4	3	11	1537	368.35	2042	0.7619	1159	1465
1	1	199	111	111	2158	1178.52	613.9	4	4	14	1724	507.87	2603	0.5238	1168	1471
1	1	199	112	112	2516	1151.55	521.1	3	1	10	1511	320.36	1957	0.7619	1161	1530
1	1	199	112	112	2516	1151.55	521.1	3	2	13	1589	389.08	2204	0.6667	1167	1550
1	1	199	112	112	2516	1151.55	521.1	3	3	15	1858	333.08	2377	0.4762	1175	1524
1	1	199	113	113	747	853.665	178.3	1	1	12	1839	331.63	2366	0.3571	1176	966
1	1	199	114	114	1116	1055.1	371.7	2	1	16	1986	616.96	3288	0.4118	1174	1769
1	1	199	114	114	1116	1055.1	371.7	2	2	14	1946	565.14	2811	0.8235	1187	1764
1	1	199	115	115	741	935.208	227.7	0	NaN	NaN	NaN	NaN	NaN	NaN	NaN	NaN
1	1	199	116	116	786	1211.4	751.2	1	1	11	1315	268.73	1719	0.7333	1212	46
1	1	199	117	117	676	924.117	201.3	1	1	14	1821	513.8	2791	0.3571	1223	1267
1	1	199	118	118	1594	1162.19	548.8	0	NaN	NaN	NaN	NaN	NaN	NaN	NaN	NaN
1	1	199	119	119	1383	849.872	160.5	1	1	13	1885	435.05	2659	0.6842	1253	878
1	1	199	120	120	797	918.04	220.6	1	1	16	2357	686.05	3485	0.3571	1258	1668
1	1	199	121	121	991	1222.53	689.6	0	NaN	NaN	NaN	NaN	NaN	NaN	NaN	NaN
1	1	199	122	122	1426	1148.63	545.8	2	1	10	1298	249.89	1694	0.5	1351	716
1	1	199	122	122	1426	1148.63	545.8	2	2	9	1424	256.58	1722	0.65	1358	731
1	1	199	123	123	1118	1188.28	667.2	0	NaN	NaN	NaN	NaN	NaN	NaN	NaN	NaN
1	1	199	124	124	1051	921.276	227.2	1	1	14	2066	324.08	2629	0.875	1346	1566
1	1	199	125	125	2159	1154.73	487.4	2	1	12	1837	452.2	2412	0.4286	1360	1333
1	1	199	125	125	2159	1154.73	487.4	2	2	14	1766	417.91	2459	0.4286	1379	1342
1	1	199	126	126	695	960.886	313.2	0	NaN	NaN	NaN	NaN	NaN	NaN	NaN	NaN
1	1	199	127	127	698	1078.78	491.3	1	1	9	1596	277.46	1920	0.5	1381	592
1	1	199	128	128	1462	986.129	342	1	1	9	1424	253.7	1767	0.5	1412	1756
1	1	199	129	129	1249	1038.15	375.5	1	1	9	1289	177.44	1581	0.5789	1402	1804
1	1	199	130	130	647	1002.02	405.2	0	NaN	NaN	NaN	NaN	NaN	NaN	NaN	NaN
1	1	199	131	131	812	935.517	287.6	0	NaN	NaN	NaN	NaN	NaN	NaN	NaN	NaN
1	1	199	132	132	1131	964.137	312.6	2	1	14	1579	435.92	2251	0.8889	1417	183
1	1	199	132	132	1131	964.137	312.6	2	2	13	1539	399.62	2280	0.6667	1425	189
1	1	199	133	133	759	867.308	198.2	0	NaN	NaN	NaN	NaN	NaN	NaN	NaN	NaN
1	1	199	134	134	1029	1243.44	761.2	1	1	10	1369	223.48	1759	0.7647	1436	1685
1	1	199	135	135	1619	1028.79	449.9	1	1	14	1647	434.1	2290	0.5	1438	1110
1	1	199	136	136	2642	805.094	135.2	2	1	9	1443	257.14	1742	0.4091	1447	1025
1	1	199	136	136	2642	805.094	135.2	2	2	10	1364	262.45	1809	0.2273	1465	1043
1	1	199	137	137	1884	680.159	98	2	1	10	1621	287.14	1979	0.6842	1444	321
1	1	199	137	137	1884	680.159	98	2	2	10	1806	364.79	2360	0.7368	1444	326
1	1	199	138	138	718	910.117	196	0	NaN	NaN	NaN	NaN	NaN	NaN	NaN	NaN
1	1	199	139	139	1444	916.547	198.4	2	1	18	2171	647.09	3278	1	1497	795
1	1	199	139	139	1444	916.547	198.4	2	2	21	2253	829.22	3797	0.2	1505	780
1	1	199	140	140	661	970.185	308.1	1	1	9	1441	160.26	1686	0.7857	1494	246
1	1	199	141	141	1750	727.305	95.1	0	NaN	NaN	NaN	NaN	NaN	NaN	NaN	NaN
1	1	199	142	142	977	1114.6	577.8	0	NaN	NaN	NaN	NaN	NaN	NaN	NaN	NaN
1	1	199	143	143	1173	1100.57	463.4	1	1	19	2180	597.05	3220	0.6316	1515	288
1	1	199	144	144	679	921.471	314.7	0	NaN	NaN	NaN	NaN	NaN	NaN	NaN	NaN
1	1	199	145	145	1623	1022.95	385.4	0	NaN	NaN	NaN	NaN	NaN	NaN	NaN	NaN
1	1	199	146	146	667	997.672	391.7	1	1	17	1912	537.43	2741	0.8571	1539	1183
1	1	199	147	147	1092	1089.21	442.9	0	NaN	NaN	NaN	NaN	NaN	NaN	NaN	NaN
1	1	199	148	148	877	1176.43	674.2	0	NaN	NaN	NaN	NaN	NaN	NaN	NaN	NaN
1	1	199	149	149	1225	1077.04	404.6	2	1	13	1515	397.87	2158	0.3684	1562	338
1	1	199	149	149	1225	1077.04	404.6	2	2	15	1883	479.7	2767	0.6842	1578	329
1	1	199	150	150	1006	1164.5	648.2	1	1	21	2891	863.76	4095	0.5625	1559	1134
1	1	199	151	151	1596	1010.51	388.1	0	NaN	NaN	NaN	NaN	NaN	NaN	NaN	NaN
1	1	199	152	152	1183	1058.93	455.3	2	1	16	1902	530.83	2815	0.7143	1598	1605
1	1	199	152	152	1183	1058.93	455.3	2	2	14	1602	309.44	2209	0.9286	1609	1609
1	1	199	153	153	1198	843.753	179.9	0	NaN	NaN	NaN	NaN	NaN	NaN	NaN	NaN
1	1	199	154	154	1192	1126.11	501.1	1	1	17	2452	589.62	3316	0.6111	1602	1190
1	1	199	155	155	613	884.62	302.4	0	NaN	NaN	NaN	NaN	NaN	NaN	NaN	NaN
1	1	199	156	156	1154	1037.93	375.5	1	1	15	1570	271.05	1939	0.5	1622	1927
1	1	199	157	157	940	1215.82	707.7	0	NaN	NaN	NaN	NaN	NaN	NaN	NaN	NaN
1	1	199	158	158	1294	968.781	248.3	2	1	16	1996	661.88	3135	0.7368	1634	583
1	1	199	158	158	1294	968.781	248.3	2	2	14	1777	465.69	2591	0.2105	1634	604
1	1	199	159	159	2346	1168.33	504.2	1	1	9	1671	289.69	2003	0.6667	1654	269
1	1	199	160	160	1153	1074.84	456.6	1	1	9	1707	298.86	2202	0.7647	1641	1379
1	1	199	161	161	743	801.476	120.4	0	NaN	NaN	NaN	NaN	NaN	NaN	NaN	NaN
1	1	199	162	162	639	965.415	281.9	1	1	10	1378	380.64	1871	0.6923	1647	155
1	1	199	163	163	1100	1005.26	344.9	0	NaN	NaN	NaN	NaN	NaN	NaN	NaN	NaN
1	1	199	164	164	851	860.582	218.5	0	NaN	NaN	NaN	NaN	NaN	NaN	NaN	NaN
1	1	199	165	165	2583	1007.9	298.8	2	1	12	1669	330.69	2117	0.3043	1682	1702
1	1	199	165	165	2583	1007.9	298.8	2	2	14	1860	518.4	2922	0.8696	1708	1735
1	1	199	166	166	1083	1174.37	709.4	0	NaN	NaN	NaN	NaN	NaN	NaN	NaN	NaN
1	1	199	167	167	1486	999.708	290.2	1	1	21	3097	923	4095	0.45	1693	811
1	1	199	168	168	1183	950.113	303.9	0	NaN	NaN	NaN	NaN	NaN	NaN	NaN	NaN
1	1	199	169	169	747	988.619	309.7	1	1	19	1540	285.13	2088	0.6667	1702	58
1	1	199	170	170	1351	815.09	120.7	1	1	18	2416	539.07	3414	0.6316	1709	136
1	1	199	171	171	651	1071.88	564	0	NaN	NaN	NaN	NaN	NaN	NaN	NaN	NaN
1	1	199	172	172	1377	1076.6	468.3	1	1	19	2217	618.25	3221	0.55	1750	1791
1	1	199	173	173	1416	875.922	158.8	2	1	17	1827	559.85	2669	0.2	1733	287
1	1	199	173	173	1416	875.922	158.8	2	2	14	1925	585.13	2758	0.35	1740	272
1	1	199	174	174	1017	1142.49	579.1	0	NaN	NaN	NaN	NaN	NaN	NaN	NaN	NaN
1	1	199	175	175	1525	836.402	157.5	0	NaN	NaN	NaN	NaN	NaN	NaN	NaN	NaN
1	1	199	176	176	1184	1202.79	618.3	2	1	15	2444	728.79	3781	0.4737	1754	1353
1	1	199	176	176	1184	1202.79	618.3	2	2	17	2650	726.82	3870	0.7895	1766	1344
1	1	199	177	177	1385	1021.27	379.9	1	1	11	1412	241.93	1715	0.6842	1764	1734
1	1	199	178	178	636	1001	397.3	0	NaN	NaN	NaN	NaN	NaN	NaN	NaN	NaN
1	1	199	179	179	1442	1052.47	381.4	3	1	10	1469	297.48	1816	1	1811	283
1	1	199	179	179	1442	1052.47	381.4	3	2	9	1306	290.12	1710	0.4706	1811	304
1	1	199	179	179	1442	1052.47	381.4	3	3	9	1290	286.51	1638	0.8235	1814	294
1	1	199	180	180	776	929.26	379	0	NaN	NaN	NaN	NaN	NaN	NaN	NaN	NaN
1	1	199	181	181	603	961.186	302.5	0	NaN	NaN	NaN	NaN	NaN	NaN	NaN	NaN
1	1	199	182	182	1544	1222.99	636.1	2	1	14	1792	490.64	2549	0.65	1842	1222
1	1	199	182	182	1544	1222.99	636.1	2	2	9	1349	260.7	1677	0.65	1855	1229
1	1	199	183	183	663	929.16	324.2	0	NaN	NaN	NaN	NaN	NaN	NaN	NaN	NaN
1	1	199	184	184	1213	898.241	209.7	0	NaN	NaN	NaN	NaN	NaN	NaN	NaN	NaN
1	1	199	185	185	696	934.391	356.4	0	NaN	NaN	NaN	NaN	NaN	NaN	NaN	NaN
1	1	199	186	186	2643	1069.21	419.1	0	NaN	NaN	NaN	NaN	NaN	NaN	NaN	NaN
1	1	199	187	187	1952	938.644	247.8	0	NaN	NaN	NaN	NaN	NaN	NaN	NaN	NaN
1	1	199	188	188	652	1029.89	512.3	0	NaN	NaN	NaN	NaN	NaN	NaN	NaN	NaN
1	1	199	189	189	657	884.143	267.1	0	NaN	NaN	NaN	NaN	NaN	NaN	NaN	NaN
1	1	199	190	190	1129	1240.28	717	0	NaN	NaN	NaN	NaN	NaN	NaN	NaN	NaN
1	1	199	191	191	1166	1087.25	462.7	2	1	12	1869	364.62	2447	0.7368	1930	366
1	1	199	191	191	1166	1087.25	462.7	2	2	12	1832	385.8	2478	0.6316	1930	359
1	1	199	192	192	1013	1042.87	355.6	2	1	10	1275	349.69	1784	0.5294	1949	507
1	1	199	192	192	1013	1042.87	355.6	2	2	11	1399	320.14	1972	0.6471	1951	518
1	1	199	193	193	869	1145.03	678.2	0	NaN	NaN	NaN	NaN	NaN	NaN	NaN	NaN
1	1	199	194	194	931	991.413	354.7	0	NaN	NaN	NaN	NaN	NaN	NaN	NaN	NaN
1	1	199	195	195	2538	1196.59	604.8	1	1	18	2727	786.25	4095	0.8095	1960	1130
1	1	199	196	196	1003	1059.7	444.1	2	1	14	1993	472.6	2686	0.9375	1976	1524
1	1	199	196	196	1003	1059.7	444.1	2	2	12	1885	374.27	2452	0.6875	1984	1521
1	1	199	197	197	930	1053.47	488.6	0	NaN	NaN	NaN	NaN	NaN	NaN	NaN	NaN
1	1	199	198	198	1688	731.922	145.9	0	NaN	NaN	NaN	NaN	NaN	NaN	NaN	NaN
1	1	199	199	199	1190	1005.43	320.8	1	1	9	1524	329.14	1999	0.7059	2002	983
2	2	125	1	200	845	819.007	212.3	2	1	25	1783	612.43	3028	0.2667	57	1381
2	2	125	1	200	845	819.007	212.3	2	2	23	1737	508.87	2594	0.6	67	1378
2	2	125	2	201	713	843	250.1	1	1	37	1575	345.89	2090	0.9333	141	1588
2	2	125	3	202	879	995.424	551.9	2	1	22	1721	587.97	2857	0.75	154	1853
2	2	125	3	202	879	995.424	551.9	2	2	25	1916	631.87	3172	0.625	164	1861
2	2	125	4	203	1425	811.551	216.5	4	1	25	1525	467.7	2447	0.4	258	325
2	2	125	4	203	1425	811.551	216.5	4	2	18	902	213.75	1239	0.4667	274	296
2	2	125	4	203	1425	811.551	216.5	4	3	28	1245	278.98	1695	0.6	283	309
2	2	125	4	203	1425	811.551	216.5	4	4	19	1072	327.9	1632	0.4	287	296
2	2	125	5	204	1633	711.685	169.5	3	1	19	1507	486.47	2289	0.4706	299	1969
2	2	125	5	204	1633	711.685	169.5	3	2	15	1283	266.4	1806	0.4706	303	1973
2	2	125	5	204	1633	711.685	169.5	3	3	39	1478	312.33	2137	0.4706	338	1983
2	2	125	6	205	811	848.522	275.4	2	1	25	1582	489.05	2575	0.5625	354	133
2	2	125	6	205	811	848.522	275.4	2	2	23	1583	480.67	2490	0.5625	361	124
2	2	125	7	206	1127	769.075	202.3	1	1	29	2915	941.48	4095	0.4444	372	338
2	2	125	8	207	801	862.581	262.4	2	1	24	1733	631.11	3049	0.25	389	1351
2	2	125	8	207	801	862.581	262.4	2	2	23	1760	653.22	3010	0.8125	393	1362
2	2	125	9	208	695	815.273	263.7	2	1	21	1363	430.89	2213	0.6667	397	150
2	2	125	9	208	695	815.273	263.7	2	2	22	1241	317.82	1842	0.4	397	162
2	2	125	10	209	896	830.566	246.9	2	1	22	1442	482.9	2377	0.7333	424	187
2	2	125	10	209	896	830.566	246.9	2	2	23	1701	626.75	3097	0.3333	435	189
2	2	125	11	210	654	804.463	225.1	2	1	20	1571	501.29	2461	0.5714	439	756
2	2	125	11	210	654	804.463	225.1	2	2	21	1573	400.95	2377	0.4286	447	757
2	2	125	12	211	1345	797.761	245.1	1	1	31	2825	916.72	4095	0.5333	439	815
2	2	125	13	212	929	728.658	139.2	2	1	17	2194	503.49	3105	0.4667	471	321
2	2	125	13	212	929	728.658	139.2	2	2	17	2224	447.02	2959	0.2667	488	311
2	2	125	14	213	1776	741.763	203.4	5	1	18	935	219.77	1331	0.4	510	186
2	2	125	14	213	1776	741.763	203.4	5	2	19	1100	287.52	1581	0.5333	517	177
2	2	125	14	213	1776	741.763	203.4	5	3	19	1109	309.05	1684	0.5333	527	163
2	2	125	14	213	1776	741.763	203.4	5	4	19	997	261.4	1506	0.4667	536	155
2	2	125	14	213	1776	741.763	203.4	5	5	34	1283	312.07	1960	0.6	542	178
2	2	125	15	214	1517	883.201	351.5	2	1	26	2310	859.58	3929	0.5294	513	1764
2	2	125	15	214	1517	883.201	351.5	2	2	28	2245	657.92	3612	0.5882	547	1748
2	2	125	16	215	1828	896.172	285	2	1	33	3083	905.7	4095	0.4286	536	1906
2	2	125	16	215	1828	896.172	285	2	2	27	1619	522.86	2815	0.7619	544	1932
2	2	125	17	216	1559	907.425	328.4	4	1	19	1352	397.37	1984	0.7143	579	1872
2	2	125	17	216	1559	907.425	328.4	4	2	19	1102	259.65	1597	0.5238	583	1862
2	2	125	17	216	1559	907.425	328.4	4	3	21	1183	312.5	1765	0.4762	591	1860
2	2	125	17	216	1559	907.425	328.4	4	4	18	916	170.13	1236	0.1905	605	1880
2	2	125	18	217	791	887.099	377	2	1	21	1669	525.89	2731	0.6875	604	120
2	2	125	18	217	791	887.099	377	2	2	22	1753	616	2905	0.625	612	113
2	2	125	19	218	1082	872.6	323.8	2	1	22	1706	601.98	2938	0.7647	634	529
2	2	125	19	218	1082	872.6	323.8	2	2	23	2214	803.72	3935	0.5882	643	535
2	2	125	20	219	1539	829.209	312.1	2	1	12	1074	70.65	1245	0.8235	664	127
2	2	125	20	219	1539	829.209	312.1	2	2	23	1729	506.57	2636	0.8824	670	148
2	2	125	21	220	941	841.934	271.6	1	1	26	2157	607.38	3124	0.5	668	33
2	2	125	22	221	1171	720.199	117.3	1	1	27	3380	771.21	4095	0.1667	668	91
2	2	125	23	222	1243	830.167	274	1	1	22	2435	678.48	3627	0.7059	715	1420
2	2	125	24	223	1051	925.729	411.4	4	1	20	1012	244.15	1465	0.5625	699	966
2	2	125	24	223	1051	925.729	411.4	4	2	19	1180	319.76	1793	0.875	699	977
2	2	125	24	223	1051	925.729	411.4	4	3	17	1116	284.09	1627	0.5	707	963
2	2	125	24	223	1051	925.729	411.4	4	4	18	1065	289.23	1608	0.5	708	980
2	2	125	25	224	772	868.457	311.1	2	1	20	1860	668.86	3130	0.4667	717	1197
2	2	125	25	224	772	868.457	311.1	2	2	21	1813	620.84	3016	0.6667	726	1202
2	2	125	26	225	633	934.509	514	1	1	39	1377	322.37	2022	0.7143	727	1722
2	2	125	27	226	1176	786.374	199.3	2	1	23	2348	914.64	4095	0.7222	783	1773
2	2	125	27	226	1176	786.374	199.3	2	2	26	2687	970.01	4095	0.2778	787	1781
2	2	125	28	227	1100	838.731	284.4	3	1	21	1052	233.37	1483	0.4375	803	1027
2	2	125	28	227	1100	838.731	284.4	3	2	17	1089	223.67	1473	0.9375	805	1010
2	2	125	28	227	1100	838.731	284.4	3	3	21	1282	357.21	1977	0.25	814	1017
2	2	125	29	228	1814	980.388	388.4	4	1	38	1139	296.26	1837	0.4762	815	86
2	2	125	29	228	1814	980.388	388.4	4	2	19	1404	471.41	2266	0.7143	822	75
2	2	125	29	228	1814	980.388	388.4	4	3	22	1653	556.49	2823	0.619	829	67
2	2	125	29	228	1814	980.388	388.4	4	4	24	1118	225.93	1647	0.2857	838	97
2	2	125	30	229	679	773.753	216.5	2	1	19	1016	215.11	1375	0.4286	821	1527
2	2	125	30	229	679	773.753	216.5	2	2	19	1001	227.6	1397	0.7857	828	1519
2	2	125	31	230	973	887.605	313.6	2	1	27	2752	935.97	4095	0.4118	827	1680
2	2	125	31	230	973	887.605	313.6	2	2	26	2647	890.72	4095	0.7647	838	1670
2	2	125	32	231	1020	950.749	441.2	2	1	23	1750	572.09	2756	0.4444	863	1328
2	2	125	32	231	1020	950.749	441.2	2	2	24	1912	635.68	3222	0.6111	871	1319
2	2	125	33	232	610	804.659	207.5	1	1	35	1479	377.14	2162	0.3846	878	1453
2	2	125	34	233	1114	828.859	233.2	1	1	39	3240	902.2	4095	0.5	891	941
2	2	125	35	234	647	818.496	244.5	1	1	35	1666	472.3	2456	0.6429	927	98
2	2	125	36	235	599	852.215	333.2	1	1	21	2068	855.5	3704	0.5385	948	1337
2	2	125	37	236	886	892.956	377.5	3	1	25	1000	148.11	1223	0.625	948	1842
2	2	125	37	236	886	892.956	377.5	3	2	14	941	126.53	1115	0.625	957	1846
2	2	125	37	236	886	892.956	377.5	3	3	15	934	176.48	1270	0.5625	957	1832
2	2	125	38	237	1076	832.618	284.2	3	1	24	1242	331.4	1814	0.7143	962	43
2	2	125	38	237	1076	832.618	284.2	3	2	21	998	241.56	1384	0.6429	978	24
2	2	125	38	237	1076	832.618	284.2	3	3	16	854	153.68	1106	0.6429	980	34
2	2	125	39	238	649	786.513	231.8	2	1	20	1693	610.89	2877	0.2857	965	1763
2	2	125	39	238	649	786.513	231.8	2	2	22	1530	526.48	2545	0.7857	970	1757
2	2	125	40	239	854	842.691	327.1	2	1	18	1115	244.3	1625	0.8667	990	764
2	2	125	40	239	854	842.691	327.1	2	2	19	1148	291.08	1786	0.4	996	755
2	2	125	41	240	958	951.702	449.1	2	1	24	1813	662.49	3072	0.4706	990	1534
2	2	125	41	240	958	951.702	449.1	2	2	25	1900	700.18	3424	0.7647	997	1546
2	2	125	42	241	694	801.169	266.6	1	1	23	2533	1003.05	4095	0.5	1021	1136
2	2	125	43	242	1160	845.135	270.2	2	1	23	2224	961.08	4095	0.1667	1112	1687
2	2	125	43	242	1160	845.135	270.2	2	2	23	2090	878.24	4081	0.6111	1137	1689
2	2	125	44	243	1822	858.947	321.6	4	1	26	2011	777.93	3670	0.2778	1114	1938
2	2	125	44	243	1822	858.947	321.6	4	2	25	2675	994.23	4095	0.8333	1128	1942
2	2	125	44	243	1822	858.947	321.6	4	3	20	1385	369.83	2145	0.3889	1154	1952
2	2	125	44	243	1822	858.947	321.6	4	4	21	1596	491.38	2481	0.3333	1158	1964
2	2	125	45	244	1634	809.876	221.1	4	1	22	1825	612.58	2984	0.75	1127	1373
2	2	125	45	244	1634	809.876	221.1	4	2	24	1915	663.46	3200	0.75	1140	1376
2	2	125	45	244	1634	809.876	221.1	4	3	21	1580	464.64	2405	0.25	1150	1344
2	2	125	45	244	1634	809.876	221.1	4	4	21	1758	579.42	2830	0.5	1152	1353
2	2	125	46	245	671	769.991	215.6	1	1	20	2616	752.73	3975	0.5	1142	853
2	2	125	47	246	612	743.201	111.1	2	1	13	1512	422.58	2137	0.0714	1136	46
2	2	125	47	246	612	743.201	111.1	2	2	19	1437	411.21	2136	0.5714	1141	40
2	2	125	48	247	1171	860.638	292.6	2	1	24	2398	986.11	4095	0.2778	1139	748
2	2	125	48	247	1171	860.638	292.6	2	2	22	2265	940.16	4079	0.5	1153	759
2	2	125	49	248	831	897.605	385.2	1	1	34	1789	484.05	2756	0.75	1160	1885
2	2	125	50	249	608	816.077	258.9	1	1	26	2240	850.92	4095	0.3846	1179	1820
2	2	125	51	250	1330	846.667	254.6	2	1	18	1296	351.47	1858	0.1579	1176	997
2	2	125	51	250	1330	846.667	254.6	2	2	14	1210	179.66	1475	0.3684	1182	998
2	2	125	52	251	1774	889.096	346.8	2	1	41	3463	741.68	4095	0.8	1184	1284
2	2	125	52	251	1774	889.096	346.8	2	2	17	1509	101.29	1666	0.6	1205	1297
2	2	125	53	252	607	736.947	130.5	2	1	21	1252	386.51	2028	0.8462	1192	1560
2	2	125	53	252	607	736.947	130.5	2	2	21	1458	415.08	2268	0.5385	1199	1553
2	2	125	54	253	1096	632.764	79.6	2	1	13	1672	549.64	2505	0.0588	1202	243
2	2	125	54	253	1096	632.764	79.6	2	2	22	1600	475.56	2432	0.1765	1219	243
2	2	125	55	254	1295	740.558	229.3	3	1	20	1345	376.54	2036	0.8667	1217	1673
2	2	125	55	254	1295	740.558	229.3	3	2	17	1109	189.04	1445	0.4	1217	1680
2	2	125	55	254	1295	740.558	229.3	3	3	27	2453	856.61	4095	0.2667	1219	1641
2	2	125	56	255	1358	787.523	281.1	2	1	25	1688	415.9	2562	0.5625	1214	739
2	2	125	56	255	1358	787.523	281.1	2	2	13	1022	135.01	1249	0.8125	1239	747
2	2	125	57	256	1365	940.791	425.2	2	1	11	1048	124.67	1267	0.5	1221	1237
2	2	125	57	256	1365	940.791	425.2	2	2	11	1041	113.57	1227	0.45	1224	1243
2	2	125	58	257	1119	1048.22	647.3	2	1	30	1683	442.22	2609	0.6111	1260	1324
2	2	125	58	257	1119	1048.22	647.3	2	2	23	2319	675.25	3647	0.6111	1260	1336
2	2	125	59	258	1303	1035.81	662.5	2	1	11	707	57.53	804	0.6	1267	1772
2	2	125	59	258	1303	1035.81	662.5	2	2	21	1059	215.18	1405	0.9	1272	1763
2	2	125	60	259	1115	994.972	542.4	1	1	22	1294	362.29	1993	0.6471	1285	309
2	2	125	61	260	687	861.199	378.5	1	1	26	2633	967.39	4095	0.6429	1284	1019
2	2	125	62	261	2052	887.337	423.3	3	1	19	1578	418.92	2255	0.7368	1310	1711
2	2	125	62	261	2052	887.337	423.3	3	2	19	1564	280.89	2047	1	1312	1717
2	2	125	62	261	2052	887.337	423.3	3	3	22	1825	669.28	3206	0.3158	1336	1738
2	2	125	63	262	2164	889.978	303.8	4	1	21	1641	410.31	2500	0.4091	1311	1198
2	2	125	63	262	2164	889.978	303.8	4	2	21	1591	403.08	2330	0.5	1327	1183
2	2	125	63	262	2164	889.978	303.8	4	3	22	1756	553.38	2835	0.7727	1337	1197
2	2	125	63	262	2164	889.978	303.8	4	4	22	1647	523.39	2655	0.4091	1349	1199
2	2	125	64	263	1107	1044.68	674.1	2	1	19	1649	412.31	2280	0.9444	1322	1390
2	2	125	64	263	1107	1044.68	674.1	2	2	22	1830	431.02	2589	0.8333	1324	1396
2	2	125	65	264	1264	851.349	261.9	1	1	34	3248	886.75	4095	0.6842	1326	1517
2	2	125	66	265	1118	870.54	372.6	2	1	22	2342	851.73	4060	0.75	1323	2030
2	2	125	66	265	1118	870.54	372.6	2	2	26	1769	619.46	3149	0.3125	1335	2008
2	2	125	67	266	2749	900.62	370.2	5	1	21	1764	276.81	2389	0.5909	1324	1053
2	2	125	67	266	2749	900.62	370.2	5	2	21	1507	255.56	1962	0.4091	1326	1063
2	2	125	67	266	2749	900.62	370.2	5	3	22	2273	478.05	3292	0.7727	1337	1020
2	2	125	67	266	2749	900.62	370.2	5	4	26	2176	432.52	2813	0.7727	1340	1041
2	2	125	67	266	2749	900.62	370.2	5	5	20	2213	563.06	3227	0.5455	1344	1013
2	2	125	68	267	619	851.199	389.2	1	1	24	1951	774.02	3543	0.6429	1330	347
2	2	125	69	268	605	809.114	263.6	2	1	18	924	172.57	1193	0.7692	1354	1979
2	2	125	69	268	605	809.114	263.6	2	2	23	1070	260.67	1593	0.3846	1359	1968
2	2	125	70	269	659	841.228	342.8	1	1	21	1722	503.01	2675	0.7692	1379	374
2	2	125	71	270	2739	885.024	348.5	4	1	34	2609	746.84	3952	0.5217	1405	1344
2	2	125	71	270	2739	885.024	348.5	4	2	18	1091	211.57	1506	0.5652	1421	1333
2	2	125	71	270	2739	885.024	348.5	4	3	14	1070	154.23	1363	0.8261	1425	1339
2	2	125	71	270	2739	885.024	348.5	4	4	24	1947	677.48	3238	0.3913	1454	1338
2	2	125	72	271	1202	939.062	435.1	2	1	21	1522	532.08	2602	0.8333	1416	1146
2	2	125	72	271	1202	939.062	435.1	2	2	20	1132	303.03	1859	0.4444	1429	1151
2	2	125	73	272	1309	843.453	243.5	1	1	32	3208	900.78	4095	0.3158	1459	1505
2	2	125	74	273	2191	815.359	215.1	3	1	23	2014	724.85	3494	0.6364	1472	331
2	2	125	74	273	2191	815.359	215.1	3	2	13	1149	182.2	1466	0.6364	1483	356
2	2	125	74	273	2191	815.359	215.1	3	3	19	1313	330.64	1997	0.6818	1488	353
2	2	125	75	274	654	764.024	195.7	1	1	22	1522	439.51	2291	0.3571	1462	1070
2	2	125	76	275	719	926.922	562.2	2	1	16	1566	545.73	2460	0.6	1487	1094
2	2	125	76	275	719	926.922	562.2	2	2	21	2272	771.01	3731	0.8667	1492	1098
2	2	125	77	276	2480	947.443	400.5	5	1	14	943	115.02	1117	0.5909	1493	162
2	2	125	77	276	2480	947.443	400.5	5	2	21	1017	113.78	1176	0.4091	1500	175
2	2	125	77	276	2480	947.443	400.5	5	3	20	1875	615.8	2939	0.9545	1503	158
2	2	125	77	276	2480	947.443	400.5	5	4	22	1928	669.99	3365	0.5455	1504	127
2	2	125	77	276	2480	947.443	400.5	5	5	23	1287	201	1672	0.6818	1512	153
2	2	125	78	277	1824	968.164	422.1	3	1	24	2111	619.86	3504	0.6842	1493	1828
2	2	125	78	277	1824	968.164	422.1	3	2	20	1633	445.36	2494	0.6842	1497	1846
2	2	125	78	277	1824	968.164	422.1	3	3	34	1535	282.57	2192	0.4737	1503	1812
2	2	125	79	278	773	813.013	286.5	1	1	29	3137	831.27	4095	0.7333	1501	514
2	2	125	80	279	884	887.721	397.5	2	1	22	1853	691.99	3253	0.3125	1499	1302
2	2	125	80	279	884	887.721	397.5	2	2	20	1675	541.43	2664	0.625	1510	1316
2	2	125	81	280	1884	904.583	378.6	4	1	22	1607	490.97	2661	0.6	1514	85
2	2	125	81	280	1884	904.583	378.6	4	2	22	2024	663.54	3316	0.55	1516	102
2	2	125	81	280	1884	904.583	378.6	4	3	16	903	178.74	1197	0.6	1537	106
2	2	125	81	280	1884	904.583	378.6	4	4	10	692	88.73	908	0.45	1542	95
2	2	125	82	281	1639	836.012	293.5	2	1	21	2053	510.47	2963	0.8333	1525	1960
2	2	125	82	281	1639	836.012	293.5	2	2	21	2284	654.45	3648	0.6111	1526	1952
2	2	125	83	282	2274	863.505	322.1	3	1	29	1673	346.57	2231	0.8421	1560	431
2	2	125	83	282	2274	863.505	322.1	3	2	10	958	129.02	1160	0.3684	1569	447
2	2	125	83	282	2274	863.505	322.1	3	3	15	1183	277.4	1707	0.4211	1575	445
2	2	125	84	283	642	751.813	183.1	2	1	20	1587	373.74	2445	0.4615	1528	2027
2	2	125	84	283	642	751.813	183.1	2	2	22	1800	479.89	2754	0.4615	1540	2024
2	2	125	85	284	1166	937.306	454.2	3	1	16	997	202.8	1408	0.4118	1538	1609
2	2	125	85	284	1166	937.306	454.2	3	2	17	1325	320.88	1901	0.7059	1543	1622
2	2	125	85	284	1166	937.306	454.2	3	3	22	1448	209.74	1796	0.7647	1548	1627
2	2	125	86	285	1245	948.17	481.3	1	1	31	1953	490.91	3080	0.8947	1567	1664
2	2	125	87	286	699	794.87	287.5	2	1	18	1145	225.25	1527	0.6429	1557	1764
2	2	125	87	286	699	794.87	287.5	2	2	20	1218	294.87	1769	0.4286	1560	1777
2	2	125	88	287	830	945.083	555.6	2	1	19	1628	333.39	2202	0.75	1565	1849
2	2	125	88	287	830	945.083	555.6	2	2	20	1690	532.22	2557	0.8125	1566	1842
2	2	125	89	288	2160	1050.58	595.6	3	1	26	2382	893.47	4095	0.6	1568	1256
2	2	125	89	288	2160	1050.58	595.6	3	2	22	1958	685.67	3515	0.65	1591	1252
2	2	125	89	288	2160	1050.58	595.6	3	3	23	1604	542.17	2582	0.65	1597	1263
2	2	125	90	289	862	774.451	261.1	2	1	19	1827	484.43	2627	0.7333	1604	659
2	2	125	90	289	862	774.451	261.1	2	2	17	1544	288	2059	0.8667	1609	651
2	2	125	91	290	1578	1027.64	585	3	1	21	1462	411.24	2172	0.7368	1621	1652
2	2	125	91	290	1578	1027.64	585	3	2	22	1530	477.17	2631	0.6842	1632	1652
2	2	125	91	290	1578	1027.64	585	3	3	41	1948	525.37	3164	0.6842	1636	1666
2	2	125	92	291	611	737.519	179.1	0	NaN	NaN	NaN	NaN	NaN	NaN	NaN	NaN
2	2	125	93	292	784	759.944	187.3	0	NaN	NaN	NaN	NaN	NaN	NaN	NaN	NaN
2	2	125	94	293	1499	831.751	266.9	2	1	22	2733	922.41	4095	0.8571	1684	644
2	2	125	94	293	1499	831.751	266.9	2	2	26	2722	888.43	4095	0.381	1691	651
2	2	125	95	294	677	739.756	183.7	2	1	21	1234	308.82	1793	0.7143	1672	1573
2	2	125	95	294	677	739.756	183.7	2	2	21	1238	285.31	1725	0.6429	1678	1564
2	2	125	96	295	2656	905.089	350.8	3	1	21	2204	303.94	2757	0.8947	1706	371
2	2	125	96	295	2656	905.089	350.8	3	2	16	1918	210.01	2230	0.7368	1727	361
2	2	125	96	295	2656	905.089	350.8	3	3	19	1835	193.48	2176	0.5263	1729	374
2	2	125	97	296	1831	951.782	491.1	2	1	31	1436	303.64	1961	0.5714	1694	170
2	2	125	97	296	1831	951.782	491.1	2	2	29	2974	902.64	4095	0.8571	1706	172
2	2	125	98	297	787	847.293	328.8	1	1	30	1254	186.35	1546	0.8667	1705	22
2	2	125	99	298	1044	857.615	343.8	1	1	22	2181	705.28	3596	0.4706	1719	669
2	2	125	100	299	798	665.895	100.7	0	NaN	NaN	NaN	NaN	NaN	NaN	NaN	NaN
2	2	125	101	300	925	925.29	481.8	2	1	22	1448	360.59	2192	0.5	1729	1330
2	2	125	101	300	925	925.29	481.8	2	2	20	1217	274.66	1799	0.625	1734	1314
2	2	125	102	301	1044	852.228	297	0	NaN	NaN	NaN	NaN	NaN	NaN	NaN	NaN
2	2	125	103	302	2313	865.798	270.9	5	1	15	986	142.27	1198	0.2381	1748	240
2	2	125	103	302	2313	865.798	270.9	5	2	17	952	193.07	1280	0.381	1753	231
2	2	125	103	302	2313	865.798	270.9	5	3	20	1463	382.54	2262	0.4762	1773	231
2	2	125	103	302	2313	865.798	270.9	5	4	33	1620	414.06	2606	0.5714	1776	261
2	2	125	103	302	2313	865.798	270.9	5	5	20	1345	344.46	2142	0.9524	1776	246
2	2	125	104	303	1381	852.493	326.7	1	1	23	2020	556.53	3186	0.875	1772	388
2	2	125	105	304	679	760.219	179.2	2	1	20	1321	417.44	2151	0.2857	1761	1970
2	2	125	105	304	679	760.219	179.2	2	2	22	1221	316.59	1871	0.6429	1770	1985
2	2	125	106	305	1087	986.687	541.5	1	1	26	1850	642.68	3368	0.8235	1780	1688
2	2	125	107	306	1246	776.885	182.8	2	1	22	1445	313.95	1946	0.5	1782	518
2	2	125	107	306	1246	776.885	182.8	2	2	20	1246	199.63	1615	0.8889	1794	518
2	2	125	108	307	1473	899.294	374.9	1	1	24	1560	477.08	2617	0.55	1793	446
2	2	125	109	308	907	863.956	373.6	2	1	20	1430	319.57	1931	0.5625	1802	1589
2	2	125	109	308	907	863.956	373.6	2	2	14	1102	243.86	1487	0.8125	1805	1582
2	2	125	110	309	605	890.104	443.2	2	1	20	1279	376.38	1971	0.5385	1809	1831
2	2	125	110	309	605	890.104	443.2	2	2	19	1176	298.41	1781	0.6154	1816	1839
2	2	125	111	310	837	816.581	322.4	2	1	19	1244	295.19	1705	0.8125	1831	689
2	2	125	111	310	837	816.581	322.4	2	2	14	1211	210.14	1624	0.5625	1837	689
2	2	125	112	311	644	845.612	340.6	1	1	23	1398	411.22	2173	0.6923	1822	2009
2	2	125	113	312	1634	806.279	233.3	3	1	21	1027	184.7	1408	0.8889	1830	478
2	2	125	113	312	1634	806.279	233.3	3	2	15	993	157.14	1220	0.7222	1838	470
2	2	125	113	312	1634	806.279	233.3	3	3	14	949	164.96	1218	0.5	1847	460
2	2	125	114	313	1428	755.638	160.8	1	1	26	1331	232.65	1776	0.3889	1843	1579
2	2	125	115	314	1115	1002.61	502.8	2	1	25	1804	572.13	3059	0.4444	1844	1777
2	2	125	115	314	1115	1002.61	502.8	2	2	22	1967	622.72	3087	0.6111	1861	1770
2	2	125	116	315	1872	920.9	347.6	6	1	17	1451	197.35	1802	0.2727	1857	177
2	2	125	116	315	1872	920.9	347.6	6	2	10	1458	177.32	1804	0.6364	1859	188
2	2	125	116	315	1872	920.9	347.6	6	3	19	1640	259.49	2044	0.7727	1862	194
2	2	125	116	315	1872	920.9	347.6	6	4	11	1372	131.31	1566	0.4091	1861	204
2	2	125	116	315	1872	920.9	347.6	6	5	19	1761	254.64	2195	0.6364	1878	193
2	2	125	116	315	1872	920.9	347.6	6	6	12	1506	163.25	1720	0.3636	1878	211
2	2	125	117	316	1609	943.443	389.7	3	1	17	1928	604.56	3008	0.619	1912	1574
2	2	125	117	316	1609	943.443	389.7	3	2	20	1910	411.03	2660	0.7619	1916	1578
2	2	125	117	316	1609	943.443	389.7	3	3	20	1832	497.07	2699	0.9524	1920	1571
2	2	125	118	317	1104	916.698	403.6	2	1	21	1705	512.77	2630	1	1934	1513
2	2	125	118	317	1104	916.698	403.6	2	2	22	1776	539.77	2736	0.6471	1943	1517
2	2	125	119	318	1305	835.489	265.5	2	1	19	1510	425.12	2281	0.5789	1933	226
2	2	125	119	318	1305	835.489	265.5	2	2	20	1496	406.87	2189	0.6842	1943	223
2	2	125	120	319	815	709.086	137.9	2	1	15	1004	162.56	1283	0.2	1924	452
2	2	125	120	319	815	709.086	137.9	2	2	18	1216	209.69	1610	0.6	1938	462
2	2	125	121	320	697	905.382	492.7	1	1	23	1229	226.39	1601	0.8571	1937	865
2	2	125	122	321	1222	981.398	497.5	1	1	29	1725	386.8	2359	0.7778	1950	1122
2	2	125	123	322	1033	940.643	470.6	2	1	19	1311	317.38	1881	0.625	1955	339
2	2	125	123	322	1033	940.643	470.6	2	2	21	1415	312.59	2080	0.5625	1962	344
2	2	125	124	323	663	854.778	336.7	2	1	21	1101	326.71	1743	0.2857	1990	1706
2	2	125	124	323	663	854.778	336.7	2	2	19	1256	383.03	1900	0.7143	2001	1708
2	2	125	125	324	712	839.938	310.5	2	1	17	1019	249.15	1417	0.7143	2022	1574
2	2	125	125	324	712	839.938	310.5	2	2	19	1237	316.78	1907	0.7143	2026	1581
3	3	185	1	325	738	926.785	325.6	1	1	26	957	163.79	1276	0.6	54	682
3	3	185	2	326	653	843.424	302	2	1	18	1220	318.79	1836	0.3571	39	422
3	3	185	2	326	653	843.424	302	2	2	21	1148	289.54	1697	0.7143	48	413
3	3	185	3	327	1612	722.186	109	4	1	24	2010	617.83	3260	0.6875	84	210
3	3	185	3	327	1612	722.186	109	4	2	15	1031	197.32	1393	0.1875	89	188
3	3	185	3	327	1612	722.186	109	4	3	12	933	114.14	1120	0.75	90	199
3	3	185	3	327	1612	722.186	109	4	4	12	858	123.02	1093	0.125	110	200
3	3	185	4	328	710	884.132	264.5	2	1	23	1443	542.47	2539	0.8571	78	815
3	3	185	4	328	710	884.132	264.5	2	2	23	1767	607.02	2976	0.3571	93	815
3	3	185	5	329	780	840.273	178.2	2	1	24	2794	887.1	4095	0.6	88	606
3	3	185	5	329	780	840.273	178.2	2	2	23	2148	746.33	3630	0.4	96	590
3	3	185	6	330	814	880.997	258.2	1	1	24	1854	596.11	3065	0.5	96	416
3	3	185	7	331	738	959.866	382.5	2	1	21	1656	494.57	2586	0.4667	98	1399
3	3	185	7	331	738	959.866	382.5	2	2	22	1658	500.69	2545	0.6	110	1396
3	3	185	8	332	612	854.979	178.1	2	1	19	1265	334.77	1896	0.1538	112	1281
3	3	185	8	332	612	854.979	178.1	2	2	19	1101	326.13	1732	0.3846	131	1291
3	3	185	9	333	903	858.65	333.4	3	1	13	1449	223.89	1734	0.7143	124	102
3	3	185	9	333	903	858.65	333.4	3	2	14	1264	188.26	1524	0.5714	126	84
3	3	185	9	333	903	858.65	333.4	3	3	13	1496	206.92	1879	0.4286	128	105
3	3	185	10	334	813	948.739	344.1	1	1	26	2047	650.64	3663	0.75	127	701
3	3	185	11	335	860	929.406	324.6	3	1	22	1344	322.68	1923	0.3125	137	1455
3	3	185	11	335	860	929.406	324.6	3	2	15	955	139.83	1155	0.5625	146	1447
3	3	185	11	335	860	929.406	324.6	3	3	18	973	182.71	1334	0.6875	155	1447
3	3	185	12	336	1416	906.432	398.4	5	1	18	943	155.28	1265	0.5625	177	564
3	3	185	12	336	1416	906.432	398.4	5	2	14	973	189.7	1254	0.75	184	578
3	3	185	12	336	1416	906.432	398.4	5	3	18	1097	239.6	1576	0.75	191	583
3	3	185	12	336	1416	906.432	398.4	5	4	15	1036	140.21	1310	0.6875	197	588
3	3	185	12	336	1416	906.432	398.4	5	5	13	963	106.59	1119	0.3125	197	594
3	3	185	13	337	2075	959.834	342.5	5	1	19	1001	257.29	1486	0.4118	187	1356
3	3	185	13	337	2075	959.834	342.5	5	2	20	1069	238.45	1488	0.7647	197	1360
3	3	185	13	337	2075	959.834	342.5	5	3	32	1224	229.04	1725	0.8235	206	1356
3	3	185	13	337	2075	959.834	342.5	5	4	19	1520	441.8	2270	1	230	1354
3	3	185	13	337	2075	959.834	342.5	5	5	15	1541	346.91	2143	0.8235	234	1357
3	3	185	14	338	824	922.952	317.6	1	1	23	2260	801.06	3845	0.625	220	335
3	3	185	15	339	765	864.486	197.9	2	1	21	1336	305.03	1863	0.8	225	1912
3	3	185	15	339	765	864.486	197.9	2	2	20	1296	288.39	1824	0.5333	227	1902
3	3	185	16	340	1608	928.784	303.5	5	1	14	985	213.65	1348	0.2941	235	1242
3	3	185	16	340	1608	928.784	303.5	5	2	12	941	177.78	1277	0.6471	238	1228
3	3	185	16	340	1608	928.784	303.5	5	3	18	1276	341.14	1847	0.8824	246	1227
3	3	185	16	340	1608	928.784	303.5	5	4	15	1072	209.4	1458	0.7059	254	1224
3	3	185	16	340	1608	928.784	303.5	5	5	36	1541	310.77	2210	0.4706	270	1238
3	3	185	17	341	973	1073.21	563.9	2	1	24	1390	287.59	1879	0.5294	251	1655
3	3	185	17	341	973	1073.21	563.9	2	2	21	1567	474.73	2517	0.3529	252	1647
3	3	185	18	342	570	655.474	87.3	2	1	16	1010	166.27	1351	0.1667	263	1831
3	3	185	18	342	570	655.474	87.3	2	2	15	997	167.38	1317	0.1667	275	1849
3	3	185	19	343	719	957.117	405.6	2	1	23	901	104.08	1132	0.6	289	67
3	3	185	19	343	719	957.117	405.6	2	2	13	805	94.49	990	0.2667	293	75
3	3	185	20	344	667	641.898	88.9	2	1	18	1197	251.74	1584	0.6923	293	1839
3	3	185	20	344	667	641.898	88.9	2	2	15	996	128.91	1325	0.3077	305	1850
3	3	185	21	345	1705	1014.75	488.5	3	1	19	1276	334.61	1936	0.5882	314	303
3	3	185	21	345	1705	1014.75	488.5	3	2	17	1129	212.02	1459	0.4118	324	292
3	3	185	21	345	1705	1014.75	488.5	3	3	26	2099	727.06	3525	0.9412	337	320
3	3	185	22	346	948	917.99	274.1	1	1	28	2359	738.04	3943	0.5625	327	1424
3	3	185	23	347	626	862.003	218.3	2	1	17	1006	208.06	1460	0.7692	331	1715
3	3	185	23	347	626	862.003	218.3	2	2	21	1133	236.07	1545	0.7692	337	1710
3	3	185	24	348	915	945.945	302.4	1	1	30	1994	548.65	2978	0.8125	345	1543
3	3	185	25	349	2082	952.554	518.1	3	1	15	1228	202.4	1539	0.5263	360	183
3	3	185	25	349	2082	952.554	518.1	3	2	18	1208	227.99	1636	0.5263	365	201
3	3	185	25	349	2082	952.554	518.1	3	3	56	2130	457.87	3365	0.8421	371	183
3	3	185	26	350	1434	945.371	390.6	4	1	18	948	227.27	1365	0.4375	399	537
3	3	185	26	350	1434	945.371	390.6	4	2	19	1088	296.98	1661	0.625	407	532
3	3	185	26	350	1434	945.371	390.6	4	3	49	2134	677.52	3552	0.875	419	514
3	3	185	26	350	1434	945.371	390.6	4	4	16	937	158.08	1233	0.375	432	517
3	3	185	27	351	610	877.736	236.8	2	1	22	1164	261.1	1590	0.5	405	469
3	3	185	27	351	610	877.736	236.8	2	2	21	1524	406.8	2196	0.6429	414	464
3	3	185	28	352	671	974.449	452.8	2	1	22	2165	830.88	3827	0.8571	423	1213
3	3	185	28	352	671	974.449	452.8	2	2	21	1488	499.29	2424	0.4286	433	1213
3	3	185	29	353	879	1054.22	536.2	1	1	31	2185	696.94	3450	0.625	459	1359
3	3	185	30	354	659	889.191	229.2	2	1	18	1200	277.69	1748	0.5714	464	1632
3	3	185	30	354	659	889.191	229.2	2	2	18	1407	359.29	2102	0.4286	464	1640
3	3	185	31	355	747	1036.9	578	2	1	36	1268	189.87	1781	0.8	503	923
3	3	185	31	355	747	1036.9	578	2	2	13	1095	244.74	1467	0.4	501	917
3	3	185	32	356	618	817.513	212.9	2	1	12	929	148.54	1240	0.4615	504	67
3	3	185	32	356	618	817.513	212.9	2	2	13	956	148.67	1224	0.9231	510	70
3	3	185	33	357	1531	993.933	420.2	3	1	23	1808	707.03	3081	0.5294	510	397
3	3	185	33	357	1531	993.933	420.2	3	2	20	1459	430.07	2219	0.9412	520	397
3	3	185	33	357	1531	993.933	420.2	3	3	25	2146	789.51	3817	0.7059	529	383
3	3	185	34	358	1194	903.27	274.2	2	1	23	1754	622.92	2894	0.2105	519	295
3	3	185	34	358	1194	903.27	274.2	2	2	21	1393	473.06	2354	0.3684	529	290
3	3	185	35	359	993	881.639	235.2	2	1	23	1586	460.11	2394	0.4706	543	1741
3	3	185	35	359	993	881.639	235.2	2	2	22	1816	638.73	2936	0.2941	555	1752
3	3	185	36	360	927	964.247	436.4	2	1	19	1652	383.92	2346	0.5882	567	95
3	3	185	36	360	927	964.247	436.4	2	2	18	1496	261.11	1964	0.5882	572	102
3	3	185	37	361	702	957.848	394.9	2	1	22	1663	527.14	2842	0.5	584	1332
3	3	185	37	361	702	957.848	394.9	2	2	21	1688	607.87	2864	0.6429	585	1319
3	3	185	38	362	886	933.475	300.6	2	1	19	1457	394.34	2131	0.8125	600	2027
3	3	185	38	362	886	933.475	300.6	2	2	22	1676	500.29	2642	0.4375	609	2017
3	3	185	39	363	1138	930.8	329	2	1	16	1556	493.7	2441	0.5294	614	62
3	3	185	39	363	1138	930.8	329	2	2	12	1330	232.89	1714	0.6471	620	63
3	3	185	40	364	894	935.775	318.3	2	1	22	1288	302.75	1801	0.8125	627	1926
3	3	185	40	364	894	935.775	318.3	2	2	22	1464	400.75	2330	0.5	634	1936
3	3	185	41	365	973	942.795	333.5	2	1	23	2090	642.26	3434	0.8824	646	1076
3	3	185	41	365	973	942.795	333.5	2	2	21	1701	356.41	2290	0.5294	653	1077
3	3	185	42	366	1948	1043.46	515.1	2	1	21	1548	472.63	2547	0.7368	656	162
3	3	185	42	366	1948	1043.46	515.1	2	2	10	788	96.96	936	0.5263	670	170
3	3	185	43	367	1817	773.719	174	4	1	21	1847	628.31	3018	0.3333	683	765
3	3	185	43	367	1817	773.719	174	4	2	20	1685	483.14	2655	0.2778	688	753
3	3	185	43	367	1817	773.719	174	4	3	21	1234	366	1877	0.1667	722	743
3	3	185	43	367	1817	773.719	174	4	4	17	1388	397.41	2012	0.1111	732	740
3	3	185	44	368	1534	873.919	254.1	4	1	18	1339	321.69	1915	0.6842	704	203
3	3	185	44	368	1534	873.919	254.1	4	2	20	1336	267.08	1807	0.8421	711	209
3	3	185	44	368	1534	873.919	254.1	4	3	14	1212	160.58	1418	0.7895	719	211
3	3	185	44	368	1534	873.919	254.1	4	4	13	1336	185.43	1582	0.2105	735	218
3	3	185	45	369	868	982.752	400.1	2	1	23	1594	413.28	2357	0.5625	715	1824
3	3	185	45	369	868	982.752	400.1	2	2	21	1348	279.24	1771	0.875	724	1823
3	3	185	46	370	1022	952.096	373.1	2	1	24	1606	548.49	2684	0.5882	723	807
3	3	185	46	370	1022	952.096	373.1	2	2	21	1700	611.93	2953	0.5882	737	801
3	3	185	47	371	1129	1009.31	453.3	2	1	20	1706	506.21	2662	0.8889	747	152
3	3	185	47	371	1129	1009.31	453.3	2	2	22	2038	621.29	3465	0.4444	747	161
3	3	185	48	372	1041	881.415	242.4	1	1	25	2293	814.43	3933	0.2778	748	482
3	3	185	49	373	879	962.436	412.5	1	1	26	2620	883.23	4095	0.8125	783	1678
3	3	185	50	374	1381	1042.52	457.9	2	1	22	2681	899.63	4095	0.75	787	381
3	3	185	50	374	1381	1042.52	457.9	2	2	19	2680	749.62	4095	0.95	793	384
3	3	185	51	375	939	941.732	393.6	1	1	9	990	120.97	1170	0.6471	818	255
3	3	185	52	376	986	884.253	299.9	3	1	10	1739	235.5	2194	0.7692	818	96
3	3	185	52	376	986	884.253	299.9	3	2	18	2114	392.27	2801	0.6923	821	92
3	3	185	52	376	986	884.253	299.9	3	3	19	2299	439.47	3081	0.7692	833	84
3	3	185	53	377	1386	763.151	152.2	2	1	19	1507	406.95	2281	0.3158	838	507
3	3	185	53	377	1386	763.151	152.2	2	2	17	1390	302.76	1855	0.5789	841	518
3	3	185	54	378	978	942.404	402.6	1	1	31	2169	541.48	3156	0.75	822	819
3	3	185	55	379	1797	980.184	422	4	1	25	1885	586.2	2907	0.6111	822	1343
3	3	185	55	379	1797	980.184	422	4	2	20	1615	568.33	2792	0.5	826	1321
3	3	185	55	379	1797	980.184	422	4	3	22	2352	842.45	4043	0.7778	833	1342
3	3	185	55	379	1797	980.184	422	4	4	21	1514	485.07	2446	0.3889	840	1320
3	3	185	56	380	1097	1076.1	624.2	2	1	13	908	118.88	1145	0.8889	835	212
3	3	185	56	380	1097	1076.1	624.2	2	2	14	975	148.24	1247	0.4444	841	218
3	3	185	57	381	861	853.446	236.3	2	1	16	1394	259.26	1879	0.4375	838	41
3	3	185	57	381	861	853.446	236.3	2	2	18	1438	284.5	1984	0.375	848	41
3	3	185	58	382	1093	947.28	335.5	2	1	24	1829	523.84	2989	0.5	836	773
3	3	185	58	382	1093	947.28	335.5	2	2	22	2079	707.49	3586	0.8889	847	772
3	3	185	59	383	628	848.234	266.8	2	1	16	1379	288.04	1821	0.6154	836	420
3	3	185	59	383	628	848.234	266.8	2	2	20	1475	351.69	2077	0.5385	839	426
3	3	185	60	384	1257	1141.93	693.7	2	1	24	2542	861.99	4095	0.8421	851	601
3	3	185	60	384	1257	1141.93	693.7	2	2	24	3009	831.13	4095	0.6842	862	597
3	3	185	61	385	1098	962.455	382.9	2	1	25	2549	985.85	4095	0.5	853	1051
3	3	185	61	385	1098	962.455	382.9	2	2	24	2637	1017.05	4095	0.5556	863	1060
3	3	185	62	386	1657	959.52	357.7	6	1	20	1200	286.36	1629	0.3333	873	1736
3	3	185	62	386	1657	959.52	357.7	6	2	20	1383	345.04	2138	0.5556	880	1730
3	3	185	62	386	1657	959.52	357.7	6	3	17	1345	291.67	1840	0.8333	891	1729
3	3	185	62	386	1657	959.52	357.7	6	4	21	1456	382.29	2123	0.3889	893	1708
3	3	185	62	386	1657	959.52	357.7	6	5	16	1338	289.59	1817	0.6111	894	1736
3	3	185	62	386	1657	959.52	357.7	6	6	15	1132	176.72	1453	0.3889	905	1718
3	3	185	63	387	901	980.903	485.8	1	1	23	1083	198.86	1375	0.8125	888	23
3	3	185	64	388	692	852.477	197.4	2	1	16	1717	541.91	2504	0.0714	884	928
3	3	185	64	388	692	852.477	197.4	2	2	10	1588	503.69	2406	0.0714	894	933
3	3	185	65	389	652	809.437	233.1	2	1	16	1657	213.44	2107	0.6429	896	597
3	3	185	65	389	652	809.437	233.1	2	2	16	1632	342.59	2244	0.4286	905	601
3	3	185	66	390	598	856.993	256.4	1	1	23	1707	523.49	2725	0.7692	911	209
3	3	185	67	391	1004	938.398	377.8	2	1	18	1523	521.25	2401	0.9412	919	1062
3	3	185	67	391	1004	938.398	377.8	2	2	21	1528	439.62	2246	0.5294	925	1069
3	3	185	68	392	1223	1093.02	547.3	1	1	28	2933	905.5	4095	0.6667	926	1466
3	3	185	69	393	1179	964.077	412.9	2	1	20	1414	331.06	2037	0.6667	940	242
3	3	185	69	393	1179	964.077	412.9	2	2	20	1565	433.48	2482	0.6111	954	246
3	3	185	70	394	1906	1072.9	539.1	4	1	21	2432	757.31	3926	1	948	557
3	3	185	70	394	1906	1072.9	539.1	4	2	20	2405	865.3	4095	0.6842	949	549
3	3	185	70	394	1906	1072.9	539.1	4	3	19	1355	326.44	2100	0.6842	951	573
3	3	185	70	394	1906	1072.9	539.1	4	4	10	1065	138.16	1264	0.7368	958	570
3	3	185	71	395	862	897.89	295.3	2	1	22	2313	808.13	3987	0.2667	930	1692
3	3	185	71	395	862	897.89	295.3	2	2	22	1877	547.71	2987	0.8667	942	1686
3	3	185	72	396	610	840.851	196.2	2	1	18	2237	829.7	3852	0.7692	941	826
3	3	185	72	396	610	840.851	196.2	2	2	21	1880	735.72	3190	0.5385	947	822
3	3	185	73	397	723	857.646	296.9	2	1	21	1543	527.29	2628	0.3846	957	1042
3	3	185	73	397	723	857.646	296.9	2	2	21	1719	610.41	2927	1	962	1055
3	3	185	74	398	832	847.921	323.7	1	1	16	1224	124.1	1445	0.8	957	349
3	3	185	75	399	995	967.44	391.1	2	1	21	1455	451.5	2326	0.5882	956	880
3	3	185	75	399	995	967.44	391.1	2	2	21	1839	646.93	3045	0.7647	959	872
3	3	185	76	400	1010	997.048	450.4	2	1	22	1945	742.42	3432	0.5882	983	1663
3	3	185	76	400	1010	997.048	450.4	2	2	23	2030	727.38	3451	0.4118	988	1643
3	3	185	77	401	661	796.162	177.6	1	1	23	2459	998.84	4095	0.7143	978	1162
3	3	185	78	402	680	978.71	536.8	2	1	15	969	208.61	1444	0.4286	1031	636
3	3	185	78	402	680	978.71	536.8	2	2	16	1122	262.28	1632	0.7857	1041	635
3	3	185	79	403	928	1065.73	606.3	2	1	24	1551	526.95	2594	0.4118	1032	1849
3	3	185	79	403	928	1065.73	606.3	2	2	24	1450	404.17	2315	0.9412	1044	1851
3	3	185	80	404	741	860.366	249.2	1	1	23	2489	879.57	4095	0.3333	1051	972
3	3	185	81	405	987	875.014	298.9	1	1	23	1545	275.94	2016	0.6471	1064	401
3	3	185	82	406	704	930.207	414.5	1	1	18	1121	233.66	1568	0.6	1059	521
3	3	185	83	407	1075	929.325	350.4	4	1	16	1011	204.59	1368	0.5714	1058	1934
3	3	185	83	407	1075	929.325	350.4	4	2	20	1136	273.53	1690	0.5714	1065	1923
3	3	185	83	407	1075	929.325	350.4	4	3	16	982	129.19	1177	0.6429	1079	1936
3	3	185	83	407	1075	929.325	350.4	4	4	19	861	93.49	1002	0.4286	1086	1927
3	3	185	84	408	989	927.043	339.4	2	1	24	2558	848.02	4095	0.2941	1079	1823
3	3	185	84	408	989	927.043	339.4	2	2	25	2212	712.71	3513	0.7647	1079	1839
3	3	185	85	409	666	898.188	413.7	0	NaN	NaN	NaN	NaN	NaN	NaN	NaN	NaN
3	3	185	86	410	644	795.183	188.3	0	NaN	NaN	NaN	NaN	NaN	NaN	NaN	NaN
3	3	185	87	411	1379	785.912	162.7	3	1	14	1179	118.48	1311	0.4706	1096	865
3	3	185	87	411	1379	785.912	162.7	3	2	9	1252	137.86	1460	0.7647	1102	858
3	3	185	87	411	1379	785.912	162.7	3	3	24	1598	149.2	1898	0.5882	1125	852
3	3	185	88	412	2264	937.513	363.4	5	1	26	2881	930.56	4095	0.5263	1100	971
3	3	185	88	412	2264	937.513	363.4	5	2	16	1181	143.16	1455	0.8421	1130	969
3	3	185	88	412	2264	937.513	363.4	5	3	9	1091	99.65	1243	0.4737	1135	958
3	3	185	88	412	2264	937.513	363.4	5	4	10	1078	159.98	1345	0.7368	1140	973
3	3	185	88	412	2264	937.513	363.4	5	5	16	1628	344.96	2249	0.5789	1149	970
3	3	185	89	413	1464	927.145	341.5	2	1	25	2898	931.27	4095	0.5714	1108	1009
3	3	185	89	413	1464	927.145	341.5	2	2	23	2437	928.59	4095	0.6667	1113	1027
3	3	185	90	414	1053	887.621	296.5	2	1	21	1999	818.11	3816	0.8235	1131	1148
3	3	185	90	414	1053	887.621	296.5	2	2	20	1691	549.19	2714	0.5294	1144	1139
3	3	185	91	415	1023	1083.66	586.1	2	1	24	2419	851.39	4095	0.6471	1139	1746
3	3	185	91	415	1023	1083.66	586.1	2	2	27	2148	707.85	3517	0.5882	1150	1736
3	3	185	92	416	1450	815.296	219.1	0	NaN	NaN	NaN	NaN	NaN	NaN	NaN	NaN
3	3	185	93	417	2210	1042.52	454.3	4	1	19	2120	483.22	3090	0.6818	1187	824
3	3	185	93	417	2210	1042.52	454.3	4	2	19	2230	581.09	3425	0.5	1197	809
3	3	185	93	417	2210	1042.52	454.3	4	3	21	1916	517.22	2996	0.7273	1199	832
3	3	185	93	417	2210	1042.52	454.3	4	4	20	1497	273.07	2023	0.4091	1206	804
3	3	185	94	418	731	834.798	214.1	2	1	20	1345	383.51	2061	0.3571	1189	1485
3	3	185	94	418	731	834.798	214.1	2	2	21	1632	560.43	2613	0.6429	1194	1467
3	3	185	95	419	630	985.381	495.9	1	1	13	819	112.8	1003	0.6429	1203	246
3	3	185	96	420	1808	1009.67	388.5	3	1	27	2370	804.24	3909	0.7	1207	1746
3	3	185	96	420	1808	1009.67	388.5	3	2	24	1757	565.61	2820	0.7	1231	1747
3	3	185	96	420	1808	1009.67	388.5	3	3	21	1733	543.07	2647	0.45	1234	1760
3	3	185	97	421	942	1009.92	485.9	1	1	15	1041	167.89	1304	0.375	1221	179
3	3	185	98	422	609	841.243	318.7	1	1	16	1417	195.19	1737	0.5385	1220	876
3	3	185	99	423	648	902.619	393.4	2	1	17	1668	562.3	2653	0.9286	1228	1701
3	3	185	99	423	648	902.619	393.4	2	2	20	1672	443.98	2577	0.4286	1234	1705
3	3	185	100	424	1097	968.302	452.3	4	1	20	2080	690.46	3295	0.5714	1240	1008
3	3	185	100	424	1097	968.302	452.3	4	2	19	2284	722.58	3837	1	1250	1008
3	3	185	100	424	1097	968.302	452.3	4	3	18	1737	327.57	2276	0.7143	1265	1011
3	3	185	100	424	1097	968.302	452.3	4	4	17	1887	340.5	2522	0.4286	1272	1013
3	3	185	101	425	651	765.805	160.4	1	1	24	1995	506.77	3016	0.5385	1265	1581
3	3	185	102	426	1890	979.734	492.4	4	1	21	1968	532.74	3013	0.6471	1266	1698
3	3	185	102	426	1890	979.734	492.4	4	2	21	1973	623.64	3069	0.7647	1276	1711
3	3	185	102	426	1890	979.734	492.4	4	3	17	1099	164.75	1335	0.4706	1297	1727
3	3	185	102	426	1890	979.734	492.4	4	4	15	1009	132.57	1207	0.5882	1298	1712
3	3	185	103	427	783	743.725	137.9	1	1	27	2765	932.78	4095	0.3333	1269	1105
3	3	185	104	428	1204	909.918	372.4	2	1	21	1476	465.86	2552	0.4706	1274	1454
3	3	185	104	428	1204	909.918	372.4	2	2	14	985	155.24	1219	0.5882	1289	1448
3	3	185	105	429	1389	868.529	217.7	2	1	21	1460	424.06	2224	0.25	1282	667
3	3	185	105	429	1389	868.529	217.7	2	2	19	1363	362.2	2005	0.85	1287	655
3	3	185	106	430	1485	782.576	180.4	1	1	29	3193	842.8	4095	0.45	1304	1495
3	3	185	107	431	614	820.928	165	1	1	23	1642	261.84	2158	0.6923	1290	1617
3	3	185	108	432	1572	1010.06	447.8	3	1	18	1144	241.26	1600	0.75	1300	237
3	3	185	108	432	1572	1010.06	447.8	3	2	35	1448	373.01	2121	0.65	1309	245
3	3	185	108	432	1572	1010.06	447.8	3	3	15	870	150.26	1117	0.65	1311	227
3	3	185	109	433	1704	973.446	395	2	1	21	1819	619.98	3036	0.5909	1321	1311
3	3	185	109	433	1704	973.446	395	2	2	23	2927	996.33	4095	0.4545	1331	1329
3	3	185	110	434	1268	1105.56	670.5	4	1	17	1326	321.6	1919	0.6316	1326	1240
3	3	185	110	434	1268	1105.56	670.5	4	2	20	1420	290.77	1941	0.8947	1327	1229
3	3	185	110	434	1268	1105.56	670.5	4	3	17	1460	437.84	2369	0.5263	1328	1221
3	3	185	110	434	1268	1105.56	670.5	4	4	15	1377	319.21	1898	0.6842	1332	1238
3	3	185	111	435	819	808.474	140.9	2	1	19	1748	497.42	2731	0.2	1317	1827
3	3	185	111	435	819	808.474	140.9	2	2	22	1761	570.57	2905	0.4	1338	1822
3	3	185	112	436	1279	1106.83	626.1	1	1	21	1224	333.19	1845	0.7368	1331	201
3	3	185	113	437	1671	908.648	262	3	1	30	3213	839.82	4095	0.35	1327	721
3	3	185	113	437	1671	908.648	262	3	2	14	1606	236.58	2095	0.4	1340	738
3	3	185	113	437	1671	908.648	262	3	3	12	1315	163.39	1576	0.55	1347	728
3	3	185	114	438	1513	991.862	415.9	1	1	30	3252	901.36	4095	0.5	1337	1411
3	3	185	115	439	1061	972.059	386.9	2	1	23	2644	945.37	4095	0.5882	1340	593
3	3	185	115	439	1061	972.059	386.9	2	2	22	2728	885.38	4095	0.4706	1341	582
3	3	185	116	440	1660	926.624	442.4	2	1	26	2020	601.95	3210	0.4706	1358	1315
3	3	185	116	440	1660	926.624	442.4	2	2	22	2000	672.89	3383	0.8824	1393	1315
3	3	185	117	441	1355	887.324	341.3	1	1	34	2021	447.94	3028	0.75	1370	1588
3	3	185	118	442	1105	1026.27	575.7	1	1	39	2201	523.93	3493	0.8235	1376	1532
3	3	185	119	443	793	902.595	360.3	2	1	16	1354	305.24	1878	0.4667	1381	1229
3	3	185	119	443	793	902.595	360.3	2	2	18	1489	444.37	2244	0.6667	1382	1222
3	3	185	120	444	2563	947.089	297.7	3	1	30	1938	483.6	2818	0.8095	1384	1650
3	3	185	120	444	2563	947.089	297.7	3	2	38	2412	678.87	3755	0.7619	1407	1630
3	3	185	120	444	2563	947.089	297.7	3	3	23	1805	491.77	2955	0.4762	1406	1652
3	3	185	121	445	801	836.054	194.6	1	1	19	1249	252.35	1724	0.6	1372	1118
3	3	185	122	446	1999	1118.99	527.3	4	1	18	1352	382.19	2034	0.4091	1388	1848
3	3	185	122	446	1999	1118.99	527.3	4	2	18	1570	342.88	2186	0.6818	1393	1852
3	3	185	122	446	1999	1118.99	527.3	4	3	22	1776	443.59	2764	0.4091	1415	1875
3	3	185	122	446	1999	1118.99	527.3	4	4	26	1591	323.33	2207	0.6818	1417	1863
3	3	185	123	447	1226	778.169	165	2	1	22	2465	817.62	3987	0.6111	1408	110
3	3	185	123	447	1226	778.169	165	2	2	22	2108	631.1	3177	0.2222	1411	130
3	3	185	124	448	759	839.336	293.3	2	1	19	1206	221.76	1648	0.4	1408	1576
3	3	185	124	448	759	839.336	293.3	2	2	17	1330	220.88	1715	0.8	1411	1565
3	3	185	125	449	640	959.969	508.8	1	1	27	1571	288.66	2204	0.7857	1416	691
3	3	185	126	450	1306	912.117	314.5	2	1	18	1410	319.32	1924	0.5789	1432	1472
3	3	185	126	450	1306	912.117	314.5	2	2	16	1511	258.21	1915	0.4211	1436	1495
3	3	185	127	451	1869	1147.22	599.7	4	1	14	1780	498.57	2516	0.6364	1444	583
3	3	185	127	451	1869	1147.22	599.7	4	2	15	1803	662.9	3105	0.5909	1446	575
3	3	185	127	451	1869	1147.22	599.7	4	3	17	2290	699.37	3599	0.7727	1449	580
3	3	185	127	451	1869	1147.22	599.7	4	4	21	1451	337.87	2093	0.6818	1457	577
3	3	185	128	452	630	869.222	357.1	1	1	14	1520	189.25	1861	0.6429	1449	721
3	3	185	129	453	743	816.887	228.2	2	1	19	1682	503.98	2526	0.4286	1446	1173
3	3	185	129	453	743	816.887	228.2	2	2	16	1343	307.47	1939	0.9286	1453	1168
3	3	185	130	454	1699	846.401	269.8	2	1	26	2847	725.97	4095	1	1465	1523
3	3	185	130	454	1699	846.401	269.8	2	2	21	2396	624.01	3517	0.5294	1490	1501
3	3	185	131	455	1672	914.232	282.6	4	1	13	1106	203.19	1480	0.7273	1464	1973
3	3	185	131	455	1672	914.232	282.6	4	2	16	1196	197.87	1635	0.3182	1476	1954
3	3	185	131	455	1672	914.232	282.6	4	3	18	1673	388.91	2319	0.7273	1477	1973
3	3	185	131	455	1672	914.232	282.6	4	4	21	1842	376.02	2580	0.5909	1478	1979
3	3	185	132	456	1071	933.497	386.7	2	1	18	1236	182.74	1509	0.7222	1474	337
3	3	185	132	456	1071	933.497	386.7	2	2	16	1046	106.71	1240	0.5	1483	334
3	3	185	133	457	718	881.767	291.9	1	1	23	1732	589.71	2893	0.9286	1496	768
3	3	185	134	458	1178	977.009	407.2	2	1	28	2781	960.09	4095	0.5	1506	437
3	3	185	134	458	1178	977.009	407.2	2	2	26	2245	752.67	3970	0.4444	1522	423
3	3	185	135	459	1236	1004.38	466.2	4	1	21	1891	665.16	3245	0.5294	1507	930
3	3	185	135	459	1236	1004.38	466.2	4	2	17	1530	436.27	2343	0.7059	1519	928
3	3	185	135	459	1236	1004.38	466.2	4	3	22	1842	746.5	3325	0.2941	1519	954
3	3	185	135	459	1236	1004.38	466.2	4	4	21	1633	529.43	2621	0.4706	1524	942
3	3	185	136	460	2476	561.975	108.9	1	1	34	3194	876.42	4095	0.24	1550	1191
3	3	185	137	461	1098	1031.91	516.2	2	1	21	2166	798.73	3609	0.7778	1529	1398
3	3	185	137	461	1098	1031.91	516.2	2	2	21	2333	805.31	3931	0.6667	1533	1391
3	3	185	138	462	1111	821.131	166	1	1	12	832	109.79	978	0.3125	1539	13
3	3	185	139	463	760	901.118	315.9	1	1	21	1501	382.28	2250	0.8667	1557	1497
3	3	185	140	464	1432	995.922	415.1	2	1	17	1369	360.26	2062	0.65	1562	426
3	3	185	140	464	1432	995.922	415.1	2	2	20	1312	361.97	1952	0.9	1572	415
3	3	185	141	465	1057	991.597	458	2	1	16	1299	290.07	1834	0.8889	1587	535
3	3	185	141	465	1057	991.597	458	2	2	16	1308	241.12	1711	0.6111	1593	541
3	3	185	142	466	668	844.26	243.8	2	1	18	1705	370.69	2386	0.8571	1586	1688
3	3	185	142	466	668	844.26	243.8	2	2	21	1791	497.45	2797	0.7143	1587	1696
3	3	185	143	467	2485	952.678	342.6	3	1	25	3051	783.33	4095	0.4545	1588	1621
3	3	185	143	467	2485	952.678	342.6	3	2	17	1369	210.09	1733	0.7273	1599	1602
3	3	185	143	467	2485	952.678	342.6	3	3	22	1878	328.98	2420	0.4091	1609	1630
3	3	185	144	468	1308	913.772	308	2	1	19	2313	683.32	3488	0.4737	1583	706
3	3	185	144	468	1308	913.772	308	2	2	16	1868	436.86	2653	0.4211	1584	700
3	3	185	145	469	611	845.048	243.1	2	1	20	1246	383.16	1963	0.5385	1602	96
3	3	185	145	469	611	845.048	243.1	2	2	17	1021	246.42	1419	0.2308	1607	86
3	3	185	146	470	1332	803.253	177.1	1	1	24	2702	799.32	4095	0.1111	1615	1533
3	3	185	147	471	1027	1038.51	541.9	2	1	21	1813	588.79	2854	0.6875	1619	786
3	3	185	147	471	1027	1038.51	541.9	2	2	22	1781	563.56	2893	0.875	1625	794
3	3	185	148	472	1173	1014.72	451.5	2	1	17	1004	171.2	1264	0.5	1616	1282
3	3	185	148	472	1173	1014.72	451.5	2	2	18	1120	299.71	1608	0.7222	1629	1279
3	3	185	149	473	1291	839.225	230.2	2	1	21	1412	409.2	2185	0.3889	1620	584
3	3	185	149	473	1291	839.225	230.2	2	2	17	1084	212.39	1440	0.6111	1623	601
3	3	185	150	474	1380	734.112	89.1	1	1	10	2469	862.84	4095	0.0526	1647	848
3	3	185	151	475	1192	954.23	373.4	2	1	22	1861	629.76	3262	0.6111	1650	1342
3	3	185	151	475	1192	954.23	373.4	2	2	24	2282	911.6	4007	0.6667	1664	1348
3	3	185	152	476	2056	1003.2	414.4	4	1	30	1355	309.98	2061	0.55	1659	1156
3	3	185	152	476	2056	1003.2	414.4	4	2	16	1334	310.46	2017	1	1679	1164
3	3	185	152	476	2056	1003.2	414.4	4	3	9	1126	98.9	1288	0.8	1684	1164
3	3	185	152	476	2056	1003.2	414.4	4	4	11	998	87.75	1100	0.6	1687	1171
3	3	185	153	477	1169	851.053	238.5	1	1	28	2562	885.89	4095	0.5	1667	1524
3	3	185	154	478	935	1025.98	517.1	2	1	24	1715	600	2985	0.6471	1693	763
3	3	185	154	478	935	1025.98	517.1	2	2	20	1671	547.47	2650	0.5294	1699	754
3	3	185	155	479	1288	1054.27	505.6	2	1	19	1735	548.33	2798	0.3684	1702	1284
3	3	185	155	479	1288	1054.27	505.6	2	2	20	1313	349.78	2075	0.7368	1705	1301
3	3	185	156	480	753	762.155	174	1	1	9	799	65.5	879	0.4615	1726	1121
3	3	185	157	481	1916	869.889	241.5	2	1	22	1662	524.63	2820	0.2609	1724	818
3	3	185	157	481	1916	869.889	241.5	2	2	21	1845	753.18	3520	0.4348	1750	834
3	3	185	158	482	1244	871.984	244.3	1	1	35	2383	752.36	3999	0.5	1734	1392
3	3	185	159	483	1185	943.712	359.2	2	1	24	2128	804.89	3955	0.5	1740	1524
3	3	185	159	483	1185	943.712	359.2	2	2	21	1860	502.2	2805	0.6111	1752	1539
3	3	185	160	484	605	884.59	344.3	1	1	18	1397	301.93	2093	0.6154	1764	1984
3	3	185	161	485	810	798.491	193.7	2	1	17	1427	343.71	2044	0.1429	1761	1125
3	3	185	161	485	810	798.491	193.7	2	2	19	1605	540.12	2525	0.1429	1784	1137
3	3	185	162	486	1196	837.845	192	2	1	19	1201	337.01	1791	0.3333	1776	236
3	3	185	162	486	1196	837.845	192	2	2	20	1538	560.85	2692	0.2778	1786	254
3	3	185	163	487	1387	763.917	172.1	1	1	19	1763	457.61	2647	0.5625	1782	84
3	3	185	164	488	1255	1009.36	454.5	2	1	16	1205	250.45	1751	0.6111	1810	1246
3	3	185	164	488	1255	1009.36	454.5	2	2	17	1150	248.89	1617	0.4444	1810	1257
3	3	185	165	489	903	869.442	263.5	2	1	18	1439	182.42	1800	0.5625	1791	367
3	3	185	165	489	903	869.442	263.5	2	2	16	1500	256.65	1909	0.6875	1791	375
3	3	185	166	490	777	860.806	261.6	2	1	19	1519	445.35	2520	0.4667	1793	792
3	3	185	166	490	777	860.806	261.6	2	2	22	1947	639.55	3161	0.3333	1808	788
3	3	185	167	491	1004	879.497	300.6	2	1	21	1806	554.92	2913	0.3529	1807	1577
3	3	185	167	491	1004	879.497	300.6	2	2	22	1723	536.51	2932	0.8235	1819	1568
3	3	185	168	492	1113	1030.77	483.1	2	1	19	1354	326.15	2000	0.6667	1841	463
3	3	185	168	492	1113	1030.77	483.1	2	2	19	1317	295.54	1836	0.6667	1842	451
3	3	185	169	493	944	1064.3	689.5	1	1	22	1762	551.95	2664	0.9375	1842	1409
3	3	185	170	494	1083	957.548	389.1	2	1	21	1430	421.7	2183	0.3889	1833	1470
3	3	185	170	494	1083	957.548	389.1	2	2	22	1436	426.88	2314	0.6111	1852	1469
3	3	185	171	495	1338	802.863	146.7	1	1	25	2501	729.07	3871	0.8421	1851	1524
3	3	185	172	496	1129	965.004	372.1	1	1	28	3042	928.22	4095	0.3889	1847	1184
3	3	185	173	497	957	980.204	473.7	2	1	18	1569	354.7	2136	0.5882	1864	542
3	3	185	173	497	957	980.204	473.7	2	2	17	1746	373.77	2412	0.7059	1871	554
3	3	185	174	498	1424	872.834	244.4	1	1	28	3022	887.86	4095	0.4211	1876	1563
3	3	185	175	499	880	846.285	260.5	2	1	14	1283	265.21	1778	0.6	1883	396
3	3	185	175	499	880	846.285	260.5	2	2	15	1356	202.8	1800	0.4667	1885	407
3	3	185	176	500	954	1041.85	589.3	1	1	19	1471	432.58	2408	0.5294	1877	735
3	3	185	177	501	1182	870.545	216.6	1	1	27	2658	837.21	4095	0.4444	1898	1679
3	3	185	178	502	600	840.157	239.3	1	1	15	946	126.01	1115	0.25	1919	417
3	3	185	179	503	641	787.538	123.3	1	1	20	1226	248.43	1813	0.4615	1916	677
3	3	185	180	504	1646	855.615	265.5	2	1	17	1419	317.46	2062	0.7778	1927	761
3	3	185	180	504	1646	855.615	265.5	2	2	17	1759	350.78	2323	0.3333	1954	777
3	3	185	181	505	2060	929.959	314.5	5	1	13	1643	147.34	1920	0.5556	1930	147
3	3	185	181	505	2060	929.959	314.5	5	2	9	1298	115.65	1463	0.7778	1931	168
3	3	185	181	505	2060	929.959	314.5	5	3	17	1372	200.02	1735	0.3333	1934	178
3	3	185	181	505	2060	929.959	314.5	5	4	9	1288	87.98	1387	0.6667	1940	160
3	3	185	181	505	2060	929.959	314.5	5	5	9	1525	167.19	1751	0.4444	1941	124
3	3	185	182	506	1087	1023.62	487.9	1	1	26	2511	846.74	4031	0.5294	1975	1260
3	3	185	183	507	681	931.9	447.3	1	1	14	1070	175.53	1407	0.7143	1979	899
3	3	185	184	508	824	843.016	190.1	2	1	22	1435	435.16	2329	0.4	1991	279
3	3	185	184	508	824	843.016	190.1	2	2	21	1238	345.29	1810	0.4667	1994	263
3	3	185	185	509	664	750.157	123.6	1	1	24	2144	793.92	3774	0.6923	2016	658
4	4	216	1	510	1903	940.351	406.9	3	1	38	1803	507.07	2997	0.5294	41	542
4	4	216	1	510	1903	940.351	406.9	3	2	19	1208	285.83	1668	0.7059	62	533
4	4	216	1	510	1903	940.351	406.9	3	3	16	994	183.76	1343	0.6471	69	527
4	4	216	2	511	665	855.048	241	2	1	18	1234	234.01	1653	0.7857	48	1887
4	4	216	2	511	665	855.048	241	2	2	11	1029	131.69	1201	0.3571	60	1888
4	4	216	3	512	1572	949.765	356.2	3	1	15	1323	267.12	1755	0.6875	55	1938
4	4	216	3	512	1572	949.765	356.2	3	2	15	1326	307.19	1814	0.625	64	1966
4	4	216	3	512	1572	949.765	356.2	3	3	18	1296	289.51	1895	0.5625	73	1966
4	4	216	4	513	2042	1062.82	453.5	5	1	23	1478	472.36	2402	0.7	59	1430
4	4	216	4	513	2042	1062.82	453.5	5	2	21	1470	418.44	2206	0.95	71	1424
4	4	216	4	513	2042	1062.82	453.5	5	3	20	1183	299.96	1668	0.65	81	1419
4	4	216	4	513	2042	1062.82	453.5	5	4	18	1317	332.9	1984	0.3	100	1426
4	4	216	4	513	2042	1062.82	453.5	5	5	16	1449	370.55	2063	0.3	101	1434
4	4	216	5	514	827	862.386	192.4	2	1	20	1405	419.61	2287	0.25	56	626
4	4	216	5	514	827	862.386	192.4	2	2	21	1521	513.27	2589	0.5	72	634
4	4	216	6	515	1469	932.736	263.2	3	1	23	1438	398.97	2069	0.4706	62	256
4	4	216	6	515	1469	932.736	263.2	3	2	22	1596	530.09	2701	0.4706	79	248
4	4	216	6	515	1469	932.736	263.2	3	3	30	1408	303.5	2008	0.8235	82	270
4	4	216	7	516	1781	949.908	299.7	3	1	25	2548	863.49	4095	0.3889	65	1724
4	4	216	7	516	1781	949.908	299.7	3	2	16	1213	255.85	1615	0.4444	102	1706
4	4	216	7	516	1781	949.908	299.7	3	3	15	1216	216.94	1630	0.3889	106	1712
4	4	216	8	517	1684	1004.66	441.7	4	1	18	1099	276.45	1566	0.3333	84	739
4	4	216	8	517	1684	1004.66	441.7	4	2	20	1672	473.33	2477	0.8889	97	739
4	4	216	8	517	1684	1004.66	441.7	4	3	15	1226	234.5	1692	0.7222	105	736
4	4	216	8	517	1684	1004.66	441.7	4	4	26	1088	199.86	1482	0.6667	123	738
4	4	216	9	518	665	956.343	394.9	2	1	18	1388	368.89	2133	0.2857	100	926
4	4	216	9	518	665	956.343	394.9	2	2	21	2034	772.32	3551	0.7143	106	916
4	4	216	10	519	802	791.494	127.8	2	1	9	1324	418.83	1965	0.0714	112	363
4	4	216	10	519	802	791.494	127.8	2	2	22	1531	471.72	2361	0.5714	120	342
4	4	216	11	520	1252	1034.18	466.3	2	1	15	1555	248.07	1986	0.5	105	1523
4	4	216	11	520	1252	1034.18	466.3	2	2	17	1635	349.92	2199	0.8889	114	1524
4	4	216	12	521	2119	878.401	202.9	3	1	16	1339	263.73	1836	0.3	143	1884
4	4	216	12	521	2119	878.401	202.9	3	2	14	1340	141.86	1633	0.4	159	1900
4	4	216	12	521	2119	878.401	202.9	3	3	9	1477	150.7	1698	0.6	181	1893
4	4	216	13	522	727	771.282	126.5	2	1	17	1022	266.48	1499	1	150	355
4	4	216	13	522	727	771.282	126.5	2	2	17	1117	312.27	1639	0.3571	161	353
4	4	216	14	523	951	1014.42	440.5	1	1	31	3086	913.83	4095	0.6875	158	1032
4	4	216	15	524	1186	846.788	221.6	2	1	12	1054	121.79	1222	0.625	157	1521
4	4	216	15	524	1186	846.788	221.6	2	2	14	1001	170.38	1310	0.3125	164	1502
4	4	216	16	525	1074	897.832	297.9	2	1	18	1811	526.95	2793	0.7857	186	916
4	4	216	16	525	1074	897.832	297.9	2	2	18	1650	367.39	2267	0.7857	193	920
4	4	216	17	526	1193	1065.37	517.4	2	1	21	1666	563.61	2767	0.5789	186	1378
4	4	216	17	526	1193	1065.37	517.4	2	2	21	1558	482.28	2545	0.4211	199	1366
4	4	216	18	527	603	877.645	295.4	1	1	22	1587	464.56	2528	0.4615	199	1431
4	4	216	19	528	885	1077.75	604.4	2	1	24	1549	425.51	2347	0.75	226	365
4	4	216	19	528	885	1077.75	604.4	2	2	24	1264	178.49	1522	0.4375	232	373
4	4	216	20	529	834	1071.95	638.1	2	1	17	1183	193.15	1531	0.8	243	828
4	4	216	20	529	834	1071.95	638.1	2	2	19	1257	213.03	1596	0.6	249	837
4	4	216	21	530	1183	1016.74	489	3	1	24	1961	609.36	3081	0.4	259	461
4	4	216	21	530	1183	1016.74	489	3	2	12	992	139.43	1284	0.9333	271	446
4	4	216	21	530	1183	1016.74	489	3	3	12	1008	144.03	1278	0.6667	277	438
4	4	216	22	531	886	1047.31	499.9	1	1	14	983	105.42	1140	0.5333	270	1272
4	4	216	23	532	1115	860.889	184.5	4	1	17	1275	341.14	1895	0.7857	278	108
4	4	216	23	532	1115	860.889	184.5	4	2	14	1194	269.51	1629	0.7857	284	91
4	4	216	23	532	1115	860.889	184.5	4	3	14	1218	230.67	1598	0.6429	285	108
4	4	216	23	532	1115	860.889	184.5	4	4	19	1425	394.3	2222	0.7143	289	96
4	4	216	24	533	1087	829.32	122.1	2	1	24	2164	639.04	3344	0.3529	298	1810
4	4	216	24	533	1087	829.32	122.1	2	2	27	2712	921.83	4095	0.4118	304	1822
4	4	216	25	534	1062	871.205	219.9	2	1	21	1815	578.73	2991	0.3529	288	1992
4	4	216	25	534	1062	871.205	219.9	2	2	22	1849	629.68	3329	0.4118	299	2012
4	4	216	26	535	855	1002.13	456.5	2	1	19	1539	428.2	2248	0.75	312	1187
4	4	216	26	535	855	1002.13	456.5	2	2	21	2165	820.27	3803	0.6875	322	1187
4	4	216	27	536	770	846.826	183.6	2	1	18	1384	438.96	2294	0.6667	326	1040
4	4	216	27	536	770	846.826	183.6	2	2	20	1677	516.47	2713	0.4	335	1056
4	4	216	28	537	1303	1100.98	655	2	1	20	1326	356.17	1895	0.6842	335	1318
4	4	216	28	537	1303	1100.98	655	2	2	15	1113	180.64	1473	0.7368	340	1327
4	4	216	29	538	899	1070.95	569.9	2	1	23	1730	564.58	2813	0.6875	348	815
4	4	216	29	538	899	1070.95	569.9	2	2	21	1645	512.24	2512	0.875	356	821
4	4	216	30	539	1122	899.194	280	1	1	19	1166	264.02	1593	0.4706	363	1487
4	4	216	31	540	643	810.347	133.3	2	1	14	1053	278.11	1515	0.1538	374	1631
4	4	216	31	540	643	810.347	133.3	2	2	21	1368	423.79	2241	0.2308	395	1624
4	4	216	32	541	1041	910.459	258.6	2	1	22	1553	522.74	2531	0.3125	388	383
4	4	216	32	541	1041	910.459	258.6	2	2	20	1671	597.42	2978	0.5	407	391
4	4	216	33	542	1005	770.267	138.4	1	1	22	2595	885.9	4095	0.375	388	447
4	4	216	34	543	1131	989.805	390.2	2	1	20	2189	775.35	4032	0.3333	402	698
4	4	216	34	543	1131	989.805	390.2	2	2	23	2176	686.32	3708	0.3889	410	703
4	4	216	35	544	1125	1054.05	562.1	1	1	32	2808	772.71	4053	0.7222	418	1484
4	4	216	36	545	1230	984.483	401.8	1	1	26	1630	363.01	2441	0.5	427	1927
4	4	216	37	546	1425	939.756	290.2	2	1	21	2194	742.75	3406	0.5	447	571
4	4	216	37	546	1425	939.756	290.2	2	2	22	1918	659.1	3117	0.75	463	575
4	4	216	38	547	776	852.049	257	2	1	14	976	213.37	1302	0.4667	490	711
4	4	216	38	547	776	852.049	257	2	2	10	861	115.4	981	0.3333	490	720
4	4	216	39	548	706	906.593	305.8	1	1	15	982	257.14	1315	0.9286	504	64
4	4	216	40	549	1041	878.15	181.7	2	1	22	2168	785.46	3600	0.5882	499	1584
4	4	216	40	549	1041	878.15	181.7	2	2	22	1614	494.44	2700	0.2941	519	1594
4	4	216	41	550	769	988.378	440	2	1	17	1781	312.45	2309	0.4667	503	1342
4	4	216	41	550	769	988.378	440	2	2	21	1579	353.3	2393	0.6	507	1357
4	4	216	42	551	597	952.414	440.1	1	1	29	3006	1017.58	4095	0.75	524	810
4	4	216	43	552	1672	962.806	296.9	4	1	21	2297	860.97	4045	0.8235	534	365
4	4	216	43	552	1672	962.806	296.9	4	2	16	1227	300.11	1808	0.7059	541	394
4	4	216	43	552	1672	962.806	296.9	4	3	20	1887	642.52	3009	0.4706	547	371
4	4	216	43	552	1672	962.806	296.9	4	4	18	1309	372.03	2003	0.4118	550	397
4	4	216	44	553	711	782.938	166.7	2	1	14	1753	220.6	2073	0.2857	533	1881
4	4	216	44	553	711	782.938	166.7	2	2	15	1631	172.72	1938	0.7143	542	1882
4	4	216	45	554	1047	969.417	379.1	4	1	18	1530	410.25	2226	0.4706	539	630
4	4	216	45	554	1047	969.417	379.1	4	2	15	1594	451.92	2468	0.8235	546	622
4	4	216	45	554	1047	969.417	379.1	4	3	14	1734	333.18	2281	0.6471	546	628
4	4	216	45	554	1047	969.417	379.1	4	4	14	1499	312.16	2082	0.7059	553	626
4	4	216	46	555	723	953.366	481.5	2	1	15	1836	352.12	2451	0.7333	549	1490
4	4	216	46	555	723	953.366	481.5	2	2	13	1922	226.17	2315	0.5333	555	1494
4	4	216	47	556	1378	808.587	164.5	2	1	20	1942	535.42	3062	0.2941	567	220
4	4	216	47	556	1378	808.587	164.5	2	2	18	1623	361.9	2300	0.4706	581	236
4	4	216	48	557	657	819.718	163.8	1	1	23	1415	429.62	2281	0.2857	549	556
4	4	216	49	558	1136	903.274	296	2	1	20	1557	497.17	2441	0.5	555	1944
4	4	216	49	558	1136	903.274	296	2	2	22	1457	433.46	2287	0.4375	570	1954
4	4	216	50	559	661	839.62	196.7	2	1	16	1346	276.38	1798	0.3571	559	1416
4	4	216	50	559	661	839.62	196.7	2	2	19	1424	291.36	1928	0.9286	566	1412
4	4	216	51	560	605	934.088	402.4	2	1	17	1702	380.69	2451	0.4615	577	1364
4	4	216	51	560	605	934.088	402.4	2	2	14	1258	264.26	1701	0.7692	581	1374
4	4	216	52	561	2199	820.479	181	4	1	19	1008	121.39	1215	0.8235	596	56
4	4	216	52	561	2199	820.479	181	4	2	13	1158	170.96	1407	0.2941	609	42
4	4	216	52	561	2199	820.479	181	4	3	15	1179	234.26	1680	0.8824	620	52
4	4	216	52	561	2199	820.479	181	4	4	21	1225	298.25	1832	0.4706	641	57
4	4	216	53	562	665	849.662	177	1	1	22	1542	460.58	2513	0.2308	611	1975
4	4	216	54	563	1175	937.151	324.7	2	1	21	2072	510.36	2903	0.3889	618	862
4	4	216	54	563	1175	937.151	324.7	2	2	21	2375	413.18	3088	0.9444	625	870
4	4	216	55	564	663	1023.14	576.2	2	1	19	1892	481.71	2750	0.7857	625	476
4	4	216	55	564	663	1023.14	576.2	2	2	23	2001	540.6	3025	0.6429	631	483
4	4	216	56	565	1146	1071.23	577.8	2	1	16	1045	218.05	1413	0.2941	659	100
4	4	216	56	565	1146	1071.23	577.8	2	2	18	1080	263.25	1502	0.4706	663	88
4	4	216	57	566	933	824.773	197.4	1	1	10	1096	149.7	1399	0.5833	681	519
4	4	216	58	567	1030	844.179	189	2	1	13	937	126.27	1125	0.3529	661	1726
4	4	216	58	567	1030	844.179	189	2	2	13	1084	168.13	1387	0.5882	680	1720
4	4	216	59	568	839	808.151	177	1	1	19	1006	129.79	1242	0.3125	687	1289
4	4	216	60	569	860	934.664	379.5	0	NaN	NaN	NaN	NaN	NaN	NaN	NaN	NaN
4	4	216	61	570	1108	1103.35	602.2	1	1	33	1211	166.88	1536	0.9412	683	1642
4	4	216	62	571	647	832.536	151	1	1	20	1434	271.4	1953	0.4615	707	135
4	4	216	63	572	1121	1116.68	648.1	2	1	22	2857	629.42	3977	0.9444	721	734
4	4	216	63	572	1121	1116.68	648.1	2	2	22	2742	755.81	4062	0.3889	734	735
4	4	216	64	573	1017	970.574	349.7	2	1	20	1786	584.32	2779	0.5294	718	288
4	4	216	64	573	1017	970.574	349.7	2	2	20	1786	471.76	2823	0.4118	723	294
4	4	216	65	574	656	924.419	329.9	2	1	21	1790	705.95	3019	0.6429	725	997
4	4	216	65	574	656	924.419	329.9	2	2	18	1545	532.24	2600	0.6429	728	987
4	4	216	66	575	951	1032	506.9	1	1	32	1821	377.43	2461	0.5	728	79
4	4	216	67	576	666	777.643	126.6	1	1	19	1454	315.84	2079	0.6154	735	699
4	4	216	68	577	891	841.972	248.7	2	1	19	1603	284.93	2006	0.6667	749	372
4	4	216	68	577	891	841.972	248.7	2	2	15	1333	319.42	1845	0.1667	761	402
4	4	216	69	578	1651	973.595	394.9	3	1	21	2019	599.32	3211	0.5882	753	1295
4	4	216	69	578	1651	973.595	394.9	3	2	30	2492	690.08	3808	0.7647	770	1273
4	4	216	69	578	1651	973.595	394.9	3	3	20	1710	429.15	2409	0.5294	768	1299
4	4	216	70	579	1220	973.752	453	2	1	14	1411	130.89	1630	0.3529	766	739
4	4	216	70	579	1220	973.752	453	2	2	16	1370	218.21	1685	0.8824	783	740
4	4	216	71	580	724	890.768	240.5	2	1	21	1759	497.42	2660	0.8667	776	428
4	4	216	71	580	724	890.768	240.5	2	2	21	1900	601.51	3022	0.2667	782	419
4	4	216	72	581	881	1001.54	473.7	2	1	21	1346	361.42	2034	0.5	810	2024
4	4	216	72	581	881	1001.54	473.7	2	2	22	1598	493.99	2638	0.8125	824	2030
4	4	216	73	582	1331	1011.63	407.8	2	1	23	2017	584.53	3156	0.5789	836	1144
4	4	216	73	582	1331	1011.63	407.8	2	2	23	2157	868.89	3842	0.4211	837	1161
4	4	216	74	583	645	904.989	267.6	2	1	21	1489	539.08	2509	0.3077	827	1085
4	4	216	74	583	645	904.989	267.6	2	2	22	1629	640.14	2746	0.3846	831	1062
4	4	216	75	584	1925	1185.78	693.3	2	1	32	1705	399.34	2427	0.7727	859	1943
4	4	216	75	584	1925	1185.78	693.3	2	2	9	914	70.85	1039	0.6818	867	1953
4	4	216	76	585	1156	905.799	294.6	2	1	15	1545	277.03	2095	0.7647	861	495
4	4	216	76	585	1156	905.799	294.6	2	2	17	1510	339.38	1967	0.5294	862	489
4	4	216	77	586	1281	1115.41	588	3	1	20	1811	570.99	2975	0.7222	864	180
4	4	216	77	586	1281	1115.41	588	3	2	16	1239	263.53	1757	0.9444	869	172
4	4	216	77	586	1281	1115.41	588	3	3	16	1085	266.22	1477	0.5556	872	165
4	4	216	78	587	1730	860.655	297.5	1	1	16	1015	97.78	1218	0.5294	882	1680
4	4	216	79	588	741	842.351	181.2	1	1	13	2602	996.82	4095	0.1429	858	984
4	4	216	80	589	2238	990.083	402.7	7	1	14	1397	295.38	1862	0.5455	868	1620
4	4	216	80	589	2238	990.083	402.7	7	2	25	1765	243.1	2167	0.6818	874	1607
4	4	216	80	589	2238	990.083	402.7	7	3	11	1099	96.13	1245	0.4545	873	1626
4	4	216	80	589	2238	990.083	402.7	7	4	16	1803	327.33	2324	0.9091	880	1614
4	4	216	80	589	2238	990.083	402.7	7	5	14	1710	277.45	2059	0.6818	886	1610
4	4	216	80	589	2238	990.083	402.7	7	6	14	1132	156.68	1381	0.5	893	1635
4	4	216	80	589	2238	990.083	402.7	7	7	14	1185	210.47	1559	0.5	902	1637
4	4	216	81	590	621	1057.93	683.5	1	1	33	1580	425.85	2584	0.7143	878	1316
4	4	216	82	591	2251	995.785	380.9	4	1	13	1007	181.29	1281	0.65	891	1815
4	4	216	82	591	2251	995.785	380.9	4	2	29	1341	271.51	1794	0.9	902	1818
4	4	216	82	591	2251	995.785	380.9	4	3	16	1333	244.13	1785	0.75	922	1828
4	4	216	82	591	2251	995.785	380.9	4	4	22	2013	641.93	3360	0.5	928	1820
4	4	216	83	592	856	930.12	285	2	1	21	2194	958.26	3963	0.7333	905	322
4	4	216	83	592	856	930.12	285	2	2	22	2240	870.33	4095	0.4	918	317
4	4	216	84	593	1083	1137.9	657.5	1	1	31	2442	889.82	4095	0.7059	921	1025
4	4	216	85	594	606	924.026	327.9	1	1	25	2622	963.11	4095	0.6923	910	1495
4	4	216	86	595	948	901.023	248.9	1	1	24	2464	749.87	3829	0.5625	932	1940
4	4	216	87	596	688	814.18	180.4	2	1	16	988	263.54	1522	0.4286	923	79
4	4	216	87	596	688	814.18	180.4	2	2	16	1076	254.2	1586	0.4286	937	70
4	4	216	88	597	763	1032.25	501.2	1	1	12	833	153.93	1115	0.6667	950	247
4	4	216	89	598	775	925.696	301.2	1	1	18	1576	443.25	2177	0.2	942	976
4	4	216	90	599	646	905.714	288.4	2	1	21	1262	379.28	1918	0.4615	965	1566
4	4	216	90	599	646	905.714	288.4	2	2	19	1298	412	2041	0.5385	975	1562
4	4	216	91	600	1202	1097.63	577.3	2	1	22	2190	802.08	3775	0.5263	968	1359
4	4	216	91	600	1202	1097.63	577.3	2	2	21	2362	950.45	3882	0.7368	973	1348
4	4	216	92	601	619	932.67	334	1	1	19	1614	525.67	2594	0.6923	983	1135
4	4	216	93	602	674	905.396	284.5	1	1	27	2207	695.42	3372	0.6429	988	1472
4	4	216	94	603	995	795.006	158	2	1	18	1278	372.56	2035	0.2667	986	469
4	4	216	94	603	995	795.006	158	2	2	17	1080	262.04	1560	0.3333	1017	482
4	4	216	95	604	1410	908.184	298.6	1	1	24	1486	470.07	2479	0.65	1020	1014
4	4	216	96	605	2685	1153.43	520.4	4	1	17	1905	668.47	3140	0.75	1017	1326
4	4	216	96	605	2685	1153.43	520.4	4	2	21	2131	636.36	3414	0.5	1021	1331
4	4	216	96	605	2685	1153.43	520.4	4	3	21	1813	580.09	2884	0.8333	1034	1310
4	4	216	96	605	2685	1153.43	520.4	4	4	21	1780	517.7	2788	0.5	1040	1296
4	4	216	97	606	2552	1037.97	500.1	5	1	14	1593	401.62	2430	0.381	1013	1652
4	4	216	97	606	2552	1037.97	500.1	5	2	16	1224	273.72	1713	0.4286	1019	1668
4	4	216	97	606	2552	1037.97	500.1	5	3	21	1876	453.02	2674	0.619	1032	1639
4	4	216	97	606	2552	1037.97	500.1	5	4	24	2050	633.98	3221	0.381	1039	1683
4	4	216	97	606	2552	1037.97	500.1	5	5	23	1905	461.59	2797	0.5714	1045	1652
4	4	216	98	607	1030	892.499	267.9	2	1	19	1305	307.14	1972	0.5625	1019	75
4	4	216	98	607	1030	892.499	267.9	2	2	21	1564	502.91	2444	0.3125	1027	92
4	4	216	99	608	687	903.285	289.4	1	1	15	1057	261.34	1605	0.9231	1024	532
4	4	216	100	609	1070	954.103	284.9	2	1	22	1861	597.27	3026	0.3333	1021	304
4	4	216	100	609	1070	954.103	284.9	2	2	22	1685	539.62	2803	0.5556	1042	300
4	4	216	101	610	1040	1028.37	471.6	2	1	12	976	126.24	1162	0.375	1028	1741
4	4	216	101	610	1040	1028.37	471.6	2	2	28	1728	365.85	2403	0.625	1037	1752
4	4	216	102	611	730	897.327	296.5	1	1	9	755	38.82	821	0.6	1043	968
4	4	216	103	612	1226	1032.35	433.7	1	1	24	2326	897.72	4095	0.3158	1046	801
4	4	216	104	613	1148	973.802	365.4	2	1	21	2109	603.77	3243	0.6667	1053	874
4	4	216	104	613	1148	973.802	365.4	2	2	20	2176	672.78	3389	0.5556	1057	868
4	4	216	105	614	1021	860.366	198.6	2	1	20	2105	705.82	3603	0.8667	1066	425
4	4	216	105	614	1021	860.366	198.6	2	2	19	1822	388.37	2645	0.6667	1070	431
4	4	216	106	615	1603	981.901	345.9	3	1	23	1513	423.18	2202	0.5263	1072	1919
4	4	216	106	615	1603	981.901	345.9	3	2	13	1061	161.6	1353	0.7895	1085	1903
4	4	216	106	615	1603	981.901	345.9	3	3	17	1144	232.06	1549	0.5263	1087	1916
4	4	216	107	616	1257	883.91	231.2	2	1	19	1872	587.44	2832	0.7778	1078	1020
4	4	216	107	616	1257	883.91	231.2	2	2	19	2246	659.04	3444	0.7222	1085	1021
4	4	216	108	617	649	895.196	258.6	1	1	24	2267	815.3	3791	0.6923	1100	1853
4	4	216	109	618	1274	918.355	321.4	4	1	16	2372	403.85	2969	0.4706	1112	1092
4	4	216	109	618	1274	918.355	321.4	4	2	13	2016	345.46	2739	0.4706	1112	1099
4	4	216	109	618	1274	918.355	321.4	4	3	10	1548	162.9	1786	0.9412	1124	1084
4	4	216	109	618	1274	918.355	321.4	4	4	16	1338	269.93	1872	0.5294	1132	1080
4	4	216	110	619	716	867.768	235.1	1	1	23	2146	780.58	3855	0.9231	1120	1579
4	4	216	111	620	1631	1066.54	448.2	2	1	20	1538	418.98	2255	0.6667	1127	1442
4	4	216	111	620	1631	1066.54	448.2	2	2	25	2554	746.27	3832	0.7619	1134	1429
4	4	216	112	621	659	928.921	380.6	2	1	16	1848	387.28	2700	0.2857	1134	210
4	4	216	112	621	659	928.921	380.6	2	2	14	1769	321.3	2326	0.6429	1140	201
4	4	216	113	622	1688	1000.05	435.8	3	1	15	1027	116.18	1195	0.2105	1128	667
4	4	216	113	622	1688	1000.05	435.8	3	2	21	1791	582.83	3045	0.3158	1140	688
4	4	216	113	622	1688	1000.05	435.8	3	3	16	1292	255.41	1737	0.3684	1146	658
4	4	216	114	623	1120	1043.73	451	2	1	22	2095	673.41	3545	0.6111	1145	1328
4	4	216	114	623	1120	1043.73	451	2	2	24	2215	809.19	3857	0.5556	1145	1312
4	4	216	115	624	1097	1088.27	597	2	1	22	2237	749.67	3697	0.7647	1155	234
4	4	216	115	624	1097	1088.27	597	2	2	24	1852	406.21	2599	0.5882	1155	244
4	4	216	116	625	1395	971.315	342.5	2	1	22	1919	753.68	3403	0.5	1160	1054
4	4	216	116	625	1395	971.315	342.5	2	2	21	2154	831.65	3768	0.55	1171	1047
4	4	216	117	626	1969	845.034	211.5	2	1	16	1233	327.16	1827	0.3043	1171	644
4	4	216	117	626	1969	845.034	211.5	2	2	19	1351	334.65	1932	0.4783	1183	629
4	4	216	118	627	1282	931.324	297.3	2	1	22	2096	910.49	3948	0.2778	1154	571
4	4	216	118	627	1282	931.324	297.3	2	2	21	1881	633.46	3048	0.4444	1166	553
4	4	216	119	628	1788	1013.6	448	3	1	21	1841	684.18	3289	0.5	1181	1136
4	4	216	119	628	1788	1013.6	448	3	2	22	2146	718.88	3693	0.7778	1194	1140
4	4	216	119	628	1788	1013.6	448	3	3	28	1760	487.03	2591	0.5556	1204	1156
4	4	216	120	629	701	909.21	385.3	0	NaN	NaN	NaN	NaN	NaN	NaN	NaN	NaN
4	4	216	121	630	823	941.557	393.6	1	1	23	1068	164.95	1346	0.5625	1198	775
4	4	216	122	631	926	963.557	459.4	1	1	21	1290	257.48	1907	0.7647	1199	235
4	4	216	123	632	1211	1203.88	845.6	1	1	36	2384	714.78	3998	0.7895	1209	1465
4	4	216	124	633	1813	984.298	406.8	5	1	9	901	133.27	1063	0.6316	1215	319
4	4	216	124	633	1813	984.298	406.8	5	2	10	943	148.69	1187	0.5789	1221	304
4	4	216	124	633	1813	984.298	406.8	5	3	13	977	175.82	1249	0.6842	1229	317
4	4	216	124	633	1813	984.298	406.8	5	4	10	882	134.79	1078	0.6316	1245	302
4	4	216	124	633	1813	984.298	406.8	5	5	14	1121	276.05	1634	0.4211	1247	312
4	4	216	125	634	1201	1108.39	585.6	2	1	25	1503	411.5	2305	0.4737	1219	103
4	4	216	125	634	1201	1108.39	585.6	2	2	22	1683	513.94	2702	0.7368	1228	117
4	4	216	126	635	1157	970.089	368.4	2	1	21	1755	640.55	2887	0.6316	1221	458
4	4	216	126	635	1157	970.089	368.4	2	2	21	1689	504.57	2759	0.4737	1228	468
4	4	216	127	636	655	886.974	299.4	2	1	21	1380	440.72	2191	0.2857	1215	1093
4	4	216	127	636	655	886.974	299.4	2	2	20	1794	627.29	3075	0.2857	1234	1099
4	4	216	128	637	601	827.008	199.1	1	1	16	1125	285.5	1583	0.6923	1236	145
4	4	216	129	638	882	921.1	282.5	2	1	23	1825	555.28	2792	0.5	1232	1246
4	4	216	129	638	882	921.1	282.5	2	2	21	2231	688.56	3463	0.5	1241	1254
4	4	216	130	639	973	906.367	289.5	2	1	20	1792	664.43	2987	0.4	1237	770
4	4	216	130	639	973	906.367	289.5	2	2	21	1744	574.5	2813	0.8	1248	761
4	4	216	131	640	1328	966.117	376.1	2	1	29	3096	931.19	4095	0.4	1275	1065
4	4	216	131	640	1328	966.117	376.1	2	2	23	2943	965.14	4095	0.4	1276	1054
4	4	216	132	641	666	840.212	154.4	2	1	19	1875	520.42	2783	0.1429	1253	1552
4	4	216	132	641	666	840.212	154.4	2	2	20	2254	700.78	3466	0.1429	1262	1541
4	4	216	133	642	1809	1005.26	422.8	4	1	13	1040	216.49	1327	0.7647	1267	450
4	4	216	133	642	1809	1005.26	422.8	4	2	13	893	124.71	1130	0.7647	1278	446
4	4	216	133	642	1809	1005.26	422.8	4	3	21	1832	616.29	2959	0.4706	1285	421
4	4	216	133	642	1809	1005.26	422.8	4	4	21	1504	470.84	2500	0.8235	1286	435
4	4	216	134	643	749	945.569	450	2	1	12	926	142.07	1189	0.7333	1282	1099
4	4	216	134	643	749	945.569	450	2	2	9	842	79.64	970	0.5333	1289	1089
4	4	216	135	644	1198	1163	728.3	2	1	19	1202	325.59	1674	0.5263	1280	1010
4	4	216	135	644	1198	1163	728.3	2	2	18	1114	205.57	1453	0.6316	1284	1022
4	4	216	136	645	1315	922.734	279.9	1	1	26	1699	455.75	2600	0.8889	1289	1839
4	4	216	137	646	643	966.132	432.7	2	1	21	1700	622.7	2987	0.4286	1305	1184
4	4	216	137	646	643	966.132	432.7	2	2	16	1269	265.32	1795	0.8571	1309	1192
4	4	216	138	647	2338	988.887	371.7	5	1	13	1028	122.58	1241	0.4091	1327	1580
4	4	216	138	647	2338	988.887	371.7	5	2	20	1089	157.11	1354	0.7727	1335	1566
4	4	216	138	647	2338	988.887	371.7	5	3	12	1023	123.13	1249	0.4545	1344	1557
4	4	216	138	647	2338	988.887	371.7	5	4	17	1111	216.98	1581	0.3182	1368	1569
4	4	216	138	647	2338	988.887	371.7	5	5	16	1271	285.81	1775	0.3636	1371	1583
4	4	216	139	648	632	912.09	323.6	0	NaN	NaN	NaN	NaN	NaN	NaN	NaN	NaN
4	4	216	140	649	1364	914.138	266	1	1	37	3009	811.28	4095	0.3333	1371	694
4	4	216	141	650	1071	989.17	404.3	2	1	19	1861	732.95	3383	0.9412	1380	445
4	4	216	141	650	1071	989.17	404.3	2	2	19	1883	634.64	2942	0.5882	1389	444
4	4	216	142	651	685	991.634	483.8	0	NaN	NaN	NaN	NaN	NaN	NaN	NaN	NaN
4	4	216	143	652	1035	937.681	322.2	1	1	24	2222	726.23	3448	0.6471	1394	80
4	4	216	144	653	622	992.223	485.3	1	1	23	1882	697.38	3117	0.9231	1389	541
4	4	216	145	654	658	953.304	404.8	2	1	15	2251	322.93	2968	0.8571	1396	960
4	4	216	145	654	658	953.304	404.8	2	2	19	2443	511.12	3384	0.4286	1400	967
4	4	216	146	655	816	735.933	122.6	1	1	20	2016	550.37	3124	0.5714	1405	1333
4	4	216	147	656	921	1037.46	522	2	1	13	1050	207.61	1342	0.6667	1395	141
4	4	216	147	656	921	1037.46	522	2	2	16	1174	272.77	1592	0.9333	1402	139
4	4	216	148	657	1262	1076.28	498	2	1	22	2310	808.76	3733	0.4737	1403	1105
4	4	216	148	657	1262	1076.28	498	2	2	22	2647	820.75	4095	0.6842	1411	1090
4	4	216	149	658	680	895.71	275.8	2	1	16	1170	329.91	1694	0.3571	1405	287
4	4	216	149	658	680	895.71	275.8	2	2	16	1003	264.1	1486	0.2857	1408	271
4	4	216	150	659	1931	897.248	247.5	2	1	32	2933	822.28	4095	0.5263	1472	440
4	4	216	150	659	1931	897.248	247.5	2	2	25	2471	780.94	4076	0.7368	1483	425
4	4	216	151	660	1709	1237.77	736.9	2	1	16	1658	462.05	2567	0.8095	1465	537
4	4	216	151	660	1709	1237.77	736.9	2	2	37	1865	430.78	2537	0.9524	1471	533
4	4	216	152	661	1982	969.266	353.1	1	1	27	2255	604.13	3419	0.7222	1490	1121
4	4	216	153	662	1021	1050.75	474.9	1	1	26	2579	717.75	3872	0.7222	1477	1742
4	4	216	154	663	1722	959.762	320.1	2	1	22	1662	537.51	2774	0.4286	1476	1208
4	4	216	154	663	1722	959.762	320.1	2	2	20	2020	765.11	3456	0.4762	1495	1190
4	4	216	155	664	1034	921.065	312.3	2	1	17	1230	254.19	1564	0.7857	1489	916
4	4	216	155	664	1034	921.065	312.3	2	2	13	1064	127.69	1253	0.2857	1493	909
4	4	216	156	665	2210	1096.93	498.8	3	1	20	2229	715.79	3699	0.7619	1515	159
4	4	216	156	665	2210	1096.93	498.8	3	2	21	1889	550.25	2882	0.7619	1517	151
4	4	216	156	665	2210	1096.93	498.8	3	3	21	1018	185.52	1522	0.8095	1540	164
4	4	216	157	666	1414	1013	396.2	3	1	22	1365	214.44	1689	0.6	1511	216
4	4	216	157	666	1414	1013	396.2	3	2	22	1660	463.18	2590	0.9	1518	225
4	4	216	157	666	1414	1013	396.2	3	3	21	1677	491.35	2700	0.55	1526	218
4	4	216	158	667	1457	1062.53	480	2	1	20	1788	505.29	2714	0.7	1525	1970
4	4	216	158	667	1457	1062.53	480	2	2	19	1722	563.04	2695	0.5	1525	1962
4	4	216	159	668	710	914.196	383.1	2	1	18	1143	260.92	1640	0.4667	1520	393
4	4	216	159	668	710	914.196	383.1	2	2	17	1083	242.42	1503	0.6667	1532	398
4	4	216	160	669	2311	1081.17	457	5	1	22	1941	696.39	3413	0.5	1529	1719
4	4	216	160	669	2311	1081.17	457	5	2	22	1421	420.41	2294	0.65	1537	1734
4	4	216	160	669	2311	1081.17	457	5	3	23	1960	618.85	3195	0.7	1552	1724
4	4	216	160	669	2311	1081.17	457	5	4	19	1322	329.29	1963	0.5	1565	1740
4	4	216	160	669	2311	1081.17	457	5	5	16	1113	214.13	1446	0.55	1574	1736
4	4	216	161	670	662	917.455	338.7	0	NaN	NaN	NaN	NaN	NaN	NaN	NaN	NaN
4	4	216	162	671	1248	1066.34	539.2	1	1	37	1623	356.86	2293	0.6316	1563	1215
4	4	216	163	672	895	881.754	251.7	2	1	22	1937	789.44	3579	0.375	1550	60
4	4	216	163	672	895	881.754	251.7	2	2	19	1671	521.47	2612	0.9375	1558	65
4	4	216	164	673	690	937.256	425.2	1	1	22	1481	420.45	2260	0.5714	1553	364
4	4	216	165	674	1021	973.824	372.7	2	1	21	1361	170.48	1650	0.4667	1552	1451
4	4	216	165	674	1021	973.824	372.7	2	2	20	1567	253.51	2058	0.6	1564	1452
4	4	216	166	675	1053	865.5	194.6	1	1	34	1970	600.91	3382	0.5556	1596	1656
4	4	216	167	676	759	839.24	262.8	2	1	16	1141	272.05	1574	0.7143	1590	1997
4	4	216	167	676	759	839.24	262.8	2	2	17	1195	294.01	1744	0.5714	1591	1985
4	4	216	168	677	721	924.054	431.7	1	1	21	1627	483.86	2592	0.4	1586	1242
4	4	216	169	678	855	1020.18	452.1	2	1	18	1942	618.97	3293	0.625	1597	1108
4	4	216	169	678	855	1020.18	452.1	2	2	19	1565	361.87	2211	0.875	1606	1105
4	4	216	170	679	2449	1094.52	542.4	3	1	19	1243	181	1634	0.3913	1600	1287
4	4	216	170	679	2449	1094.52	542.4	3	2	22	2053	665.3	3282	0.4348	1611	1280
4	4	216	170	679	2449	1094.52	542.4	3	3	28	2944	888.57	4095	0.6957	1625	1314
4	4	216	171	680	1452	941.284	287.4	1	1	28	3132	993.1	4095	0.8947	1619	631
4	4	216	172	681	1741	841.194	192.4	2	1	14	1952	201.37	2212	0.5	1615	1415
4	4	216	172	681	1741	841.194	192.4	2	2	21	2158	446.22	3020	0.4091	1624	1419
4	4	216	173	682	870	1027.48	503.5	2	1	19	1499	420.73	2376	0.625	1620	878
4	4	216	173	682	870	1027.48	503.5	2	2	21	1526	412.87	2263	0.625	1625	891
4	4	216	174	683	1766	934.518	261.6	3	1	14	1281	189.78	1722	0.7273	1635	1000
4	4	216	174	683	1766	934.518	261.6	3	2	21	2507	843.83	4095	0.5455	1643	989
4	4	216	174	683	1766	934.518	261.6	3	3	24	2881	961.91	4095	0.2273	1645	1006
4	4	216	175	684	1906	831.98	283	1	1	12	1393	219.48	1769	0.2353	1676	1360
4	4	216	176	685	1696	1249.89	730.3	5	1	16	1444	379.61	2048	0.4091	1651	829
4	4	216	176	685	1696	1249.89	730.3	5	2	13	1247	261.08	1612	0.5909	1658	838
4	4	216	176	685	1696	1249.89	730.3	5	3	21	1613	440.71	2363	0.7727	1659	828
4	4	216	176	685	1696	1249.89	730.3	5	4	16	1381	381.53	2152	0.7273	1665	839
4	4	216	176	685	1696	1249.89	730.3	5	5	23	1379	245.44	1798	0.6818	1672	828
4	4	216	177	686	876	963.529	372.4	2	1	16	1573	350.64	2150	0.875	1661	1610
4	4	216	177	686	876	963.529	372.4	2	2	16	1677	390.2	2315	0.5625	1668	1615
4	4	216	178	687	1043	832.557	193.9	2	1	20	1336	335.22	2018	0.25	1670	944
4	4	216	178	687	1043	832.557	193.9	2	2	17	1189	378.68	1981	0.25	1678	921
4	4	216	179	688	1307	1115.38	655.1	2	1	19	1312	407.47	2075	0.3889	1678	726
4	4	216	179	688	1307	1115.38	655.1	2	2	21	1527	484.87	2366	0.9444	1688	723
4	4	216	180	689	729	876.274	267.8	2	1	17	1272	362.4	1870	0.4667	1689	882
4	4	216	180	689	729	876.274	267.8	2	2	18	1321	401.51	2020	0.8	1700	882
4	4	216	181	690	1219	763.142	109.9	2	1	16	2488	885.23	3867	0.1053	1712	379
4	4	216	181	690	1219	763.142	109.9	2	2	22	1894	609.65	2962	0.3684	1712	408
4	4	216	182	691	1436	958.961	347.7	1	1	11	924	131.59	1115	0.5789	1734	460
4	4	216	183	692	680	941.166	421.2	2	1	15	1366	313.88	1873	0.7857	1713	1595
4	4	216	183	692	680	941.166	421.2	2	2	14	1376	283.8	1874	0.9286	1719	1596
4	4	216	184	693	1151	1130.98	649	3	1	16	1063	259.18	1472	0.6471	1719	648
4	4	216	184	693	1151	1130.98	649	3	2	17	1223	334.85	1871	0.4706	1720	658
4	4	216	184	693	1151	1130.98	649	3	3	24	1761	578.53	2928	0.8235	1733	649
4	4	216	185	694	1250	1109.48	621	1	1	30	1840	545.16	2871	0.6111	1727	734
4	4	216	186	695	1629	692.359	132.1	1	1	30	3150	818.8	4095	0.619	1742	1629
4	4	216	187	696	902	677.747	113.2	0	NaN	NaN	NaN	NaN	NaN	NaN	NaN	NaN
4	4	216	188	697	869	880.464	232.9	2	1	15	2471	368.09	3153	0.5	1767	1478
4	4	216	188	697	869	880.464	232.9	2	2	19	2578	397.53	3161	0.5625	1767	1487
4	4	216	189	698	1715	985.012	367.6	2	1	17	1109	221.03	1480	0.7222	1776	1838
4	4	216	189	698	1715	985.012	367.6	2	2	25	1217	248.74	1665	0.2222	1783	1810
4	4	216	190	699	661	834.471	173.3	2	1	18	1660	380.47	2377	0.2308	1770	1064
4	4	216	190	699	661	834.471	173.3	2	2	16	1455	284.15	1937	0.7692	1772	1046
4	4	216	191	700	657	874.17	305.6	2	1	13	1731	160.09	2052	0.7143	1779	1217
4	4	216	191	700	657	874.17	305.6	2	2	16	1991	306.81	2482	0.3571	1792	1213
4	4	216	192	701	1420	958.963	337.2	1	1	41	3350	768.7	4095	0.5	1810	1687
4	4	216	193	702	842	979.382	435.7	1	1	24	2076	659.08	3353	0.875	1796	1010
4	4	216	194	703	1361	979.369	340.2	1	1	28	1168	199.48	1563	0.5	1806	730
4	4	216	195	704	854	911.417	248.3	1	1	17	1585	421.36	2281	0.2	1823	1932
4	4	216	196	705	1067	989.61	430.2	2	1	19	1049	322.68	1659	0.2941	1809	335
4	4	216	196	705	1067	989.61	430.2	2	2	19	1335	407.41	2122	0.4706	1809	347
4	4	216	197	706	1350	932.557	319.7	2	1	22	2055	731.32	3448	0.55	1818	1645
4	4	216	197	706	1350	932.557	319.7	2	2	22	1931	619.1	3267	0.55	1833	1646
4	4	216	198	707	621	988.506	469.1	2	1	18	1413	392.12	2168	0.6923	1824	672
4	4	216	198	707	621	988.506	469.1	2	2	18	1322	350.59	1986	0.6154	1827	665
4	4	216	199	708	1385	945.009	337.1	1	1	31	3399	647.97	4095	0.8947	1826	1348
4	4	216	200	709	656	895.05	330.8	2	1	16	1035	273.86	1475	0.3571	1825	934
4	4	216	200	709	656	895.05	330.8	2	2	11	880	130.18	1062	0.4286	1830	943
4	4	216	201	710	1544	872.725	244.2	1	1	22	2099	606.63	3343	0.5	1839	1166
4	4	216	202	711	619	1025.91	603.4	1	1	20	856	132.41	1107	0.7692	1853	521
4	4	216	203	712	1266	1008.9	442.9	3	1	13	966	184.24	1237	0.8824	1861	466
4	4	216	203	712	1266	1008.9	442.9	3	2	13	997	158.1	1299	0.7059	1867	468
4	4	216	203	712	1266	1008.9	442.9	3	3	22	1478	440.18	2254	0.5294	1870	459
4	4	216	204	713	1203	958.86	359.3	2	1	19	1418	351.6	2161	0.4	1867	228
4	4	216	204	713	1203	958.86	359.3	2	2	16	1227	245.46	1635	0.8	1876	239
4	4	216	205	714	644	915.561	364.8	2	1	17	1031	244.35	1456	0.6667	1878	1859
4	4	216	205	714	644	915.561	364.8	2	2	14	890	157.34	1157	0.8333	1889	1858
4	4	216	206	715	1293	1013.78	480.2	2	1	21	1332	349.81	2050	0.5789	1900	1668
4	4	216	206	715	1293	1013.78	480.2	2	2	20	1382	372.69	2067	0.6842	1917	1662
4	4	216	207	716	649	907.117	335.1	2	1	16	1100	208.3	1447	0.4286	1899	999
4	4	216	207	716	649	907.117	335.1	2	2	15	1030	189.57	1394	0.9286	1906	994
4	4	216	208	717	1211	1159.91	722.2	1	1	26	1639	378.44	2281	0.4737	1908	1177
4	4	216	209	718	682	854.148	204.7	0	NaN	NaN	NaN	NaN	NaN	NaN	NaN	NaN
4	4	216	210	719	751	953.71	387.5	2	1	18	1190	308.37	1753	0.9286	1920	818
4	4	216	210	719	751	953.71	387.5	2	2	19	1417	426.8	2180	0.5	1924	830
4	4	216	211	720	1442	669.786	103.4	1	1	17	1070	200.83	1467	0.5556	1943	1914
4	4	216	212	721	1379	875.872	223.3	2	1	22	1893	536.08	2817	0.4211	1925	947
4	4	216	212	721	1379	875.872	223.3	2	2	21	1788	585.44	2891	0.4211	1926	973
4	4	216	213	722	954	863.506	318.7	1	1	22	1118	215.52	1494	0.5625	1940	1676
4	4	216	214	723	2472	1087.53	509.1	4	1	16	1431	312.7	1957	0.1429	1941	1296
4	4	216	214	723	2472	1087.53	509.1	4	2	20	1893	517.45	2936	0.1905	1950	1252
4	4	216	214	723	2472	1087.53	509.1	4	3	15	1467	223.46	1869	0.5714	1950	1292
4	4	216	214	723	2472	1087.53	509.1	4	4	20	2022	528.99	2968	0.8095	1965	1257
4	4	216	215	724	1865	689.087	117.7	2	1	22	1511	349.49	2193	0.4286	1964	1776
4	4	216	215	724	1865	689.087	117.7	2	2	21	1370	261.82	1793	0.3333	1979	1786
4	4	216	216	725	1206	761.156	164.9	2	1	15	1257	334.39	1761	0.0526	2012	650
4	4	216	216	725	1206	761.156	164.9	2	2	16	951	244.42	1395	0.6316	2021	629

## Sheet: JU775_Rep2
DatasetName	ImageIndex	TotalCellCount	CellIndex	GlobalCellIndex	NuclearSize	AvgNuclearIntensity	std_NuclearIntensity	Cy5_NumSpotsPerCell	Cy5_SpotIndex	Cy5_SpotSize	Cy5_MeanSpotIntensity	Cy5_std_SpotIntensity	Cy5_MaxSpotIntensity	Cy5_SpotRRD	Cy5_Spot_centroidX	Cy5_Spot_centroidY
JU775_20171011_oligo_Nuc_rDNA_001	1	50	1	1	342	1920	412	0	NaN	NaN	NaN	NaN	NaN	NaN	NaN	NaN
JU775_20171011_oligo_Nuc_rDNA_001	1	50	2	2	616	2550	1188.7	2	1	13	347	56.67	421	0.6923	125	383
JU775_20171011_oligo_Nuc_rDNA_001	1	50	2	2	616	2550	1188.7	2	2	12	310	43.15	369	0.6923	127	374
JU775_20171011_oligo_Nuc_rDNA_001	1	50	5	5	524	2550	1176.4	1	1	19	530	109.92	706	0.5833	287	1917
JU775_20171011_oligo_Nuc_rDNA_001	1	50	8	8	567	2610	1217.4	2	1	15	384	88.81	539	0.6154	383	1046
JU775_20171011_oligo_Nuc_rDNA_001	1	50	8	8	567	2610	1217.4	2	2	13	368	46.97	433	0.9231	388	1049
JU775_20171011_oligo_Nuc_rDNA_001	1	50	10	10	626	2630	1100.5	1	1	24	356	54.92	497	0.3846	447	1472
JU775_20171011_oligo_Nuc_rDNA_001	1	50	11	11	715	2690	1158.5	1	1	31	493	97.63	702	0.7333	451	232
JU775_20171011_oligo_Nuc_rDNA_001	1	50	12	12	607	2660	1190.5	1	1	25	371	62.54	535	0.6154	450	996
JU775_20171011_oligo_Nuc_rDNA_001	1	50	16	16	690	2560	1105.5	2	1	13	318	43.42	386	0.7143	564	1723
JU775_20171011_oligo_Nuc_rDNA_001	1	50	16	16	690	2560	1105.5	2	2	14	344	68.22	446	0.4286	569	1732
JU775_20171011_oligo_Nuc_rDNA_001	1	50	18	18	391	1550	364.2	0	NaN	NaN	NaN	NaN	NaN	NaN	NaN	NaN
JU775_20171011_oligo_Nuc_rDNA_001	1	50	20	20	627	2610	1209.3	1	1	20	423	110.87	687	0.7692	731	1287
JU775_20171011_oligo_Nuc_rDNA_001	1	50	23	23	628	2560	1196.2	1	1	9	337	23.04	373	0.5385	926	1310
JU775_20171011_oligo_Nuc_rDNA_001	1	50	24	24	603	2620	1186.2	2	1	15	353	59.07	450	0.5385	1021	1128
JU775_20171011_oligo_Nuc_rDNA_001	1	50	24	24	603	2620	1186.2	2	2	20	411	102.02	648	0.6923	1027	1121
JU775_20171011_oligo_Nuc_rDNA_001	1	50	25	25	700	2620	1206.2	2	1	15	420	97.67	559	0.7143	1032	1015
JU775_20171011_oligo_Nuc_rDNA_001	1	50	25	25	700	2620	1206.2	2	2	16	382	48.94	472	0.6429	1033	1023
JU775_20171011_oligo_Nuc_rDNA_001	1	50	26	26	727	2690	1244.5	2	1	10	349	77.47	468	0.5	1104	606
JU775_20171011_oligo_Nuc_rDNA_001	1	50	26	26	727	2690	1244.5	2	2	18	423	104.05	598	0.5	1110	609
JU775_20171011_oligo_Nuc_rDNA_001	1	50	27	27	841	2590	1231.9	2	1	18	445	105.92	646	0.6875	1106	1176
JU775_20171011_oligo_Nuc_rDNA_001	1	50	27	27	841	2590	1231.9	2	2	16	437	96.03	624	0.4375	1107	1185
JU775_20171011_oligo_Nuc_rDNA_001	1	50	28	28	677	2570	1097.2	1	1	24	412	70.16	586	0.6429	1142	764
JU775_20171011_oligo_Nuc_rDNA_001	1	50	29	29	594	2640	1064.6	2	1	17	419	67.74	538	0.3077	1156	310
JU775_20171011_oligo_Nuc_rDNA_001	1	50	29	29	594	2640	1064.6	2	2	16	423	86.73	549	0.6923	1168	303
JU775_20171011_oligo_Nuc_rDNA_001	1	50	30	30	692	1660	616.4	0	NaN	NaN	NaN	NaN	NaN	NaN	NaN	NaN
JU775_20171011_oligo_Nuc_rDNA_001	1	50	31	31	745	2080	1026.6	2	1	16	472	89.59	678	0.7143	1206	1439
JU775_20171011_oligo_Nuc_rDNA_001	1	50	31	31	745	2080	1026.6	2	2	18	461	62.5	580	0.2143	1208	1424
JU775_20171011_oligo_Nuc_rDNA_001	1	50	34	34	628	2380	1083	1	1	17	424	47.3	505	0.6667	1260	1381
JU775_20171011_oligo_Nuc_rDNA_001	1	50	37	37	795	2640	1183.2	2	1	20	613	185.58	979	0.7143	1348	1012
JU775_20171011_oligo_Nuc_rDNA_001	1	50	37	37	795	2640	1183.2	2	2	18	512	134.41	758	0.5714	1353	1005
JU775_20171011_oligo_Nuc_rDNA_001	1	50	38	38	544	2680	1227.7	1	1	23	363	64.98	504	0.6923	1359	613
JU775_20171011_oligo_Nuc_rDNA_001	1	50	40	40	726	2500	1056.8	1	1	13	384	51.16	472	0.2857	1431	757
JU775_20171011_oligo_Nuc_rDNA_001	1	50	41	41	765	2140	761.8	1	1	13	420	84.55	541	0.2143	1555	1233
JU775_20171011_oligo_Nuc_rDNA_001	1	50	42	42	867	2510	1169.2	1	1	13	459	80.95	596	0.4667	1550	665
JU775_20171011_oligo_Nuc_rDNA_001	1	50	47	47	611	1930	555.5	0	NaN	NaN	NaN	NaN	NaN	NaN	NaN	NaN
JU775_20171011_oligo_Nuc_rDNA_001	1	50	48	48	837	1610	395.8	0	NaN	NaN	NaN	NaN	NaN	NaN	NaN	NaN
JU775_20171011_oligo_Nuc_rDNA_002	2	49	1	51	672	2490	1197.6	1	1	17	377	76.23	556	0.5	41	275
JU775_20171011_oligo_Nuc_rDNA_002	2	49	2	52	653	2140	652.2	2	1	13	322	62.89	409	0.6154	48	590
JU775_20171011_oligo_Nuc_rDNA_002	2	49	2	52	653	2140	652.2	2	2	14	339	65.62	488	0.6923	57	586
JU775_20171011_oligo_Nuc_rDNA_002	2	49	4	54	884	2380	1192.5	1	1	26	395	79.65	571	0.75	97	564
JU775_20171011_oligo_Nuc_rDNA_002	2	49	5	55	650	1510	389.6	0	NaN	NaN	NaN	NaN	NaN	NaN	NaN	NaN
JU775_20171011_oligo_Nuc_rDNA_002	2	49	6	56	411	2080	811.1	0	NaN	NaN	NaN	NaN	NaN	NaN	NaN	NaN
JU775_20171011_oligo_Nuc_rDNA_002	2	49	9	59	880	2500	1232.6	1	1	31	431	86.52	643	0.6875	248	602
JU775_20171011_oligo_Nuc_rDNA_002	2	49	13	63	681	2300	969.9	2	1	11	335	43.23	412	0.2857	552	256
JU775_20171011_oligo_Nuc_rDNA_002	2	49	13	63	681	2300	969.9	2	2	13	343	57.64	470	0.5714	562	245
JU775_20171011_oligo_Nuc_rDNA_002	2	49	15	65	640	2350	1231.4	1	1	22	458	53.39	559	0.6429	621	644
JU775_20171011_oligo_Nuc_rDNA_002	2	49	17	67	757	2470	1163.6	1	1	14	304	37.23	358	0.5333	712	1994
JU775_20171011_oligo_Nuc_rDNA_002	2	49	18	68	626	2530	1047.3	2	1	15	370	72.16	471	0.7692	747	460
JU775_20171011_oligo_Nuc_rDNA_002	2	49	18	68	626	2530	1047.3	2	2	14	327	53.31	425	0.3077	753	467
JU775_20171011_oligo_Nuc_rDNA_002	2	49	19	69	746	2210	896.7	2	1	12	326	52.78	429	0.7857	762	1361
JU775_20171011_oligo_Nuc_rDNA_002	2	49	19	69	746	2210	896.7	2	2	14	342	57.48	418	0.2857	775	1354
JU775_20171011_oligo_Nuc_rDNA_002	2	49	20	70	860	2510	1171	2	1	15	378	68.4	486	0.625	763	1059
JU775_20171011_oligo_Nuc_rDNA_002	2	49	20	70	860	2510	1171	2	2	18	530	151.7	857	0.8125	770	1057
JU775_20171011_oligo_Nuc_rDNA_002	2	49	21	71	683	2390	1030.5	1	1	15	375	69.4	480	0.3571	862	1332
JU775_20171011_oligo_Nuc_rDNA_002	2	49	27	77	871	2580	1162.6	2	1	17	388	86	534	0.5625	976	1621
JU775_20171011_oligo_Nuc_rDNA_002	2	49	27	77	871	2580	1162.6	2	2	14	390	69.21	494	0.3125	982	1630
JU775_20171011_oligo_Nuc_rDNA_002	2	49	29	79	697	2480	1217.9	2	1	14	504	69.72	631	0.4286	1229	1269
JU775_20171011_oligo_Nuc_rDNA_002	2	49	29	79	697	2480	1217.9	2	2	15	482	69.2	660	1	1232	1277
JU775_20171011_oligo_Nuc_rDNA_002	2	49	31	81	770	1650	481.8	1	1	20	625	211.29	1120	0.4615	1328	716
JU775_20171011_oligo_Nuc_rDNA_002	2	49	34	84	588	2460	1183.8	2	1	14	375	72.3	524	0.75	1395	1669
JU775_20171011_oligo_Nuc_rDNA_002	2	49	34	84	588	2460	1183.8	2	2	18	414	62.77	543	0.6667	1403	1671
JU775_20171011_oligo_Nuc_rDNA_002	2	49	38	88	608	2540	1187.8	1	1	21	414	77.33	573	0.8462	1468	1463
JU775_20171011_oligo_Nuc_rDNA_002	2	49	39	89	634	2540	1179	1	1	19	407	75.92	594	0.6154	1478	482
JU775_20171011_oligo_Nuc_rDNA_002	2	49	40	90	735	2300	851.7	2	1	12	324	50.38	388	0.6429	1537	1323
JU775_20171011_oligo_Nuc_rDNA_002	2	49	40	90	735	2300	851.7	2	2	10	317	33.09	354	0.4286	1544	1323
JU775_20171011_oligo_Nuc_rDNA_002	2	49	41	91	641	2530	1216.5	2	1	12	322	54.93	407	0.8571	1536	1663
JU775_20171011_oligo_Nuc_rDNA_002	2	49	41	91	641	2530	1216.5	2	2	14	354	68.71	494	0.7143	1540	1658
JU775_20171011_oligo_Nuc_rDNA_002	2	49	42	92	535	2610	1234.7	1	1	21	378	62.79	500	0.6667	1567	911
JU775_20171011_oligo_Nuc_rDNA_002	2	49	43	93	861	2400	1121.9	1	1	23	541	138.76	810	0.3125	1701	1787
JU775_20171011_oligo_Nuc_rDNA_002	2	49	47	97	784	2170	795.9	2	1	14	415	90.88	544	0.3333	1870	1173
JU775_20171011_oligo_Nuc_rDNA_002	2	49	47	97	784	2170	795.9	2	2	20	446	106.93	687	0.8	1876	1178
JU775_20171011_oligo_Nuc_rDNA_002	2	49	49	99	608	2460	1087.8	1	1	20	440	74.81	608	0.75	1988	132
JU775_20171011_oligo_Nuc_rDNA_003	3	47	1	100	390	1410	184.2	0	NaN	NaN	NaN	NaN	NaN	NaN	NaN	NaN
JU775_20171011_oligo_Nuc_rDNA_003	3	47	2	101	473	2510	1006.5	1	1	25	395	64.44	532	0.5833	54	800
JU775_20171011_oligo_Nuc_rDNA_003	3	47	3	102	619	2320	873	1	1	11	348	47.81	441	0.2308	57	1506
JU775_20171011_oligo_Nuc_rDNA_003	3	47	6	105	366	1540	380.2	1	1	10	335	52.96	410	0.6667	240	248
JU775_20171011_oligo_Nuc_rDNA_003	3	47	9	108	727	2300	973.7	2	1	21	574	157.35	875	0.5714	507	252
JU775_20171011_oligo_Nuc_rDNA_003	3	47	9	108	727	2300	973.7	2	2	16	451	121.59	654	0.1429	518	236
JU775_20171011_oligo_Nuc_rDNA_003	3	47	10	109	874	2550	1223.4	2	1	14	457	109.49	650	0.8125	563	810
JU775_20171011_oligo_Nuc_rDNA_003	3	47	10	109	874	2550	1223.4	2	2	14	392	66.41	499	0.5	572	806
JU775_20171011_oligo_Nuc_rDNA_003	3	47	11	110	627	2270	1087.9	0	NaN	NaN	NaN	NaN	NaN	NaN	NaN	NaN
JU775_20171011_oligo_Nuc_rDNA_003	3	47	12	111	474	1660	490.2	0	NaN	NaN	NaN	NaN	NaN	NaN	NaN	NaN
JU775_20171011_oligo_Nuc_rDNA_003	3	47	13	112	810	2410	1228.8	2	1	16	452	102.94	596	0.7333	703	1446
JU775_20171011_oligo_Nuc_rDNA_003	3	47	13	112	810	2410	1228.8	2	2	12	402	57.01	497	0.8	712	1449
JU775_20171011_oligo_Nuc_rDNA_003	3	47	16	115	512	2390	959.2	1	1	13	356	76.93	470	0.4545	721	44
JU775_20171011_oligo_Nuc_rDNA_003	3	47	18	117	671	2480	1248.1	1	1	14	395	74.11	555	0.7143	751	1522
JU775_20171011_oligo_Nuc_rDNA_003	3	47	19	118	612	2600	1219.8	1	1	23	618	142.03	892	0.6154	748	507
JU775_20171011_oligo_Nuc_rDNA_003	3	47	21	120	883	2420	921.2	1	1	21	499	133.21	716	0.5	901	1284
JU775_20171011_oligo_Nuc_rDNA_003	3	47	22	121	560	2540	1245.6	1	1	24	436	77.53	584	0.9231	905	734
JU775_20171011_oligo_Nuc_rDNA_003	3	47	23	122	662	2590	1241.2	1	1	10	373	51.94	473	0.5	937	1193
JU775_20171011_oligo_Nuc_rDNA_003	3	47	24	123	647	2550	1096	2	1	11	428	59.7	556	1	982	1849
JU775_20171011_oligo_Nuc_rDNA_003	3	47	24	123	647	2550	1096	2	2	12	453	65.14	566	0.4615	988	1852
JU775_20171011_oligo_Nuc_rDNA_003	3	47	27	126	734	2450	1228.7	2	1	11	347	55.69	421	0.7857	1105	1976
JU775_20171011_oligo_Nuc_rDNA_003	3	47	27	126	734	2450	1228.7	2	2	9	325	49.92	421	0.6429	1109	1984
JU775_20171011_oligo_Nuc_rDNA_003	3	47	30	129	618	2500	1085.7	1	1	13	374	67.7	483	0.7857	1192	754
JU775_20171011_oligo_Nuc_rDNA_003	3	47	32	131	536	2500	1201.9	2	1	17	515	137.44	751	0.5385	1297	583
JU775_20171011_oligo_Nuc_rDNA_003	3	47	32	131	536	2500	1201.9	2	2	16	478	129.3	728	0.6923	1304	588
JU775_20171011_oligo_Nuc_rDNA_003	3	47	33	132	755	2280	942	2	1	18	528	161.44	825	0.4286	1396	556
JU775_20171011_oligo_Nuc_rDNA_003	3	47	33	132	755	2280	942	2	2	18	538	143.64	744	0.4286	1407	565
JU775_20171011_oligo_Nuc_rDNA_003	3	47	34	133	570	2250	1191.9	0	NaN	NaN	NaN	NaN	NaN	NaN	NaN	NaN
JU775_20171011_oligo_Nuc_rDNA_003	3	47	35	134	391	2130	754.5	1	1	11	374	63.93	455	0.3	1465	1078
JU775_20171011_oligo_Nuc_rDNA_003	3	47	36	135	338	2380	931	1	1	13	380	82.36	603	0.4	1492	1086
JU775_20171011_oligo_Nuc_rDNA_003	3	47	37	136	627	2470	870.9	2	1	13	412	90.53	574	0.6923	1647	425
JU775_20171011_oligo_Nuc_rDNA_003	3	47	37	136	627	2470	870.9	2	2	12	399	54.17	498	0.3077	1650	430
JU775_20171011_oligo_Nuc_rDNA_003	3	47	38	137	750	2170	884.7	1	1	18	419	62.94	551	0.4286	1651	965
JU775_20171011_oligo_Nuc_rDNA_003	3	47	40	139	670	2230	886.7	2	1	10	340	51.32	409	0.1429	1707	1346
JU775_20171011_oligo_Nuc_rDNA_003	3	47	40	139	670	2230	886.7	2	2	11	360	61.27	456	0.6429	1720	1334
JU775_20171011_oligo_Nuc_rDNA_003	3	47	42	141	720	2450	1158	1	1	11	505	58.36	614	0.5714	1850	1793
JU775_20171011_oligo_Nuc_rDNA_003	3	47	43	142	816	2460	1247.4	1	1	12	419	59.49	543	0.6	1850	1698
JU775_20171011_oligo_Nuc_rDNA_003	3	47	44	143	578	2410	1196.5	2	1	9	360	64.92	500	0.6667	1867	360
JU775_20171011_oligo_Nuc_rDNA_003	3	47	44	143	578	2410	1196.5	2	2	9	380	56.07	470	0.9167	1871	362
JU775_20171011_oligo_Nuc_rDNA_003	3	47	46	145	574	2420	1078.4	1	1	13	350	91.86	543	0.4615	1917	298
JU775_20171011_oligo_Nuc_rDNA_003	3	47	47	146	565	2500	1177.2	1	1	11	346	70.69	447	0.1667	2017	474
JU775_20171011_oligo_Nuc_rDNA_004	4	66	1	147	693	1840	590.3	1	1	11	366	65.78	457	0.2857	173	616
JU775_20171011_oligo_Nuc_rDNA_004	4	66	2	148	785	2510	1225.3	2	1	14	519	78.97	690	0.8667	205	1400
JU775_20171011_oligo_Nuc_rDNA_004	4	66	2	148	785	2510	1225.3	2	2	13	431	81.52	565	0.5333	213	1395
JU775_20171011_oligo_Nuc_rDNA_004	4	66	3	149	641	2360	838	2	1	19	534	146.8	765	0.3077	227	221
JU775_20171011_oligo_Nuc_rDNA_004	4	66	3	149	641	2360	838	2	2	11	418	86.31	539	0.8462	232	216
JU775_20171011_oligo_Nuc_rDNA_004	4	66	7	153	750	2120	742	1	1	24	637	183.96	1130	0.3333	270	290
JU775_20171011_oligo_Nuc_rDNA_004	4	66	8	154	828	2460	1157.1	2	1	11	558	84.27	713	0.4286	314	449
JU775_20171011_oligo_Nuc_rDNA_004	4	66	8	154	828	2460	1157.1	2	2	19	585	150.92	856	0.6429	318	442
JU775_20171011_oligo_Nuc_rDNA_004	4	66	9	155	492	2330	885.9	2	1	13	412	64.99	498	0.5455	364	1946
JU775_20171011_oligo_Nuc_rDNA_004	4	66	9	155	492	2330	885.9	2	2	13	467	110.81	672	0.4545	364	1933
JU775_20171011_oligo_Nuc_rDNA_004	4	66	12	158	325	2450	971.2	2	1	10	373	53.01	456	0.5556	390	158
JU775_20171011_oligo_Nuc_rDNA_004	4	66	12	158	325	2450	971.2	2	2	9	328	52.68	388	0.6667	394	147
JU775_20171011_oligo_Nuc_rDNA_004	4	66	14	160	857	2470	1189.3	2	1	18	514	180.5	925	0.5	418	1384
JU775_20171011_oligo_Nuc_rDNA_004	4	66	14	160	857	2470	1189.3	2	2	20	526	159.41	841	0.5625	430	1395
JU775_20171011_oligo_Nuc_rDNA_004	4	66	16	162	451	1270	118.8	0	NaN	NaN	NaN	NaN	NaN	NaN	NaN	NaN
JU775_20171011_oligo_Nuc_rDNA_004	4	66	18	164	784	2390	1180.2	1	1	21	715	200.61	1101	0.8667	517	1125
JU775_20171011_oligo_Nuc_rDNA_004	4	66	19	165	427	2560	1060.2	2	1	15	430	100.19	595	0.4545	544	1081
JU775_20171011_oligo_Nuc_rDNA_004	4	66	19	165	427	2560	1060.2	2	2	12	413	83.41	556	0.5455	554	1080
JU775_20171011_oligo_Nuc_rDNA_004	4	66	20	166	694	2320	1189.3	2	1	16	515	132.34	756	0.5714	572	254
JU775_20171011_oligo_Nuc_rDNA_004	4	66	20	166	694	2320	1189.3	2	2	16	510	133.6	756	0.6429	577	243
JU775_20171011_oligo_Nuc_rDNA_004	4	66	21	167	553	2440	781.2	1	1	21	485	87.63	652	0.5385	580	1671
JU775_20171011_oligo_Nuc_rDNA_004	4	66	22	168	598	2210	920.6	0	NaN	NaN	NaN	NaN	NaN	NaN	NaN	NaN
JU775_20171011_oligo_Nuc_rDNA_004	4	66	30	176	838	2310	1172.2	2	1	11	401	61.34	487	0.875	896	1281
JU775_20171011_oligo_Nuc_rDNA_004	4	66	30	176	838	2310	1172.2	2	2	12	400	78.09	554	0.5625	905	1279
JU775_20171011_oligo_Nuc_rDNA_004	4	66	31	177	741	2220	926.8	2	1	15	497	77.16	620	0.5385	915	12
JU775_20171011_oligo_Nuc_rDNA_004	4	66	31	177	741	2220	926.8	2	2	14	478	105.05	663	0.4615	922	24
JU775_20171011_oligo_Nuc_rDNA_004	4	66	32	178	810	2460	1228	1	1	17	626	160.48	895	0.5	917	1035
JU775_20171011_oligo_Nuc_rDNA_004	4	66	33	179	559	2260	1020.4	2	1	14	515	121.19	759	0.5833	933	73
JU775_20171011_oligo_Nuc_rDNA_004	4	66	33	179	559	2260	1020.4	2	2	16	501	126.5	716	0.6667	939	68
JU775_20171011_oligo_Nuc_rDNA_004	4	66	34	180	810	2630	1142	1	1	24	606	135.28	888	0.6	961	752
JU775_20171011_oligo_Nuc_rDNA_004	4	66	39	185	554	2610	1199.6	2	1	14	483	114.42	656	0.4615	1060	708
JU775_20171011_oligo_Nuc_rDNA_004	4	66	39	185	554	2610	1199.6	2	2	13	446	128.13	706	0.6923	1062	702
JU775_20171011_oligo_Nuc_rDNA_004	4	66	42	188	548	2640	1118.5	2	1	16	438	122.58	646	0.6667	1095	1695
JU775_20171011_oligo_Nuc_rDNA_004	4	66	42	188	548	2640	1118.5	2	2	15	441	86.04	601	0.5833	1096	1705
JU775_20171011_oligo_Nuc_rDNA_004	4	66	43	189	544	2640	1149.4	2	1	16	445	108.51	617	0.5385	1095	1625
JU775_20171011_oligo_Nuc_rDNA_004	4	66	43	189	544	2640	1149.4	2	2	16	388	77.12	528	0.8462	1103	1622
JU775_20171011_oligo_Nuc_rDNA_004	4	66	45	191	831	2670	1129.5	2	1	16	443	96.99	603	0.8667	1247	1642
JU775_20171011_oligo_Nuc_rDNA_004	4	66	45	191	831	2670	1129.5	2	2	16	482	120.94	738	0.5333	1251	1636
JU775_20171011_oligo_Nuc_rDNA_004	4	66	46	192	576	2290	889.2	0	NaN	NaN	NaN	NaN	NaN	NaN	NaN	NaN
JU775_20171011_oligo_Nuc_rDNA_004	4	66	47	193	681	2320	1162.1	1	1	19	553	68.68	724	0.5714	1435	418
JU775_20171011_oligo_Nuc_rDNA_004	4	66	48	194	812	2340	1172.4	2	1	14	459	118.61	699	0.625	1429	1903
JU775_20171011_oligo_Nuc_rDNA_004	4	66	48	194	812	2340	1172.4	2	2	13	427	89.23	573	0.8125	1438	1901
JU775_20171011_oligo_Nuc_rDNA_004	4	66	49	195	890	2610	1160	1	1	18	660	163.14	987	0.3125	1470	2027
JU775_20171011_oligo_Nuc_rDNA_004	4	66	50	196	731	2580	1222.2	2	1	15	503	133.98	734	0.5714	1459	1621
JU775_20171011_oligo_Nuc_rDNA_004	4	66	50	196	731	2580	1222.2	2	2	16	458	105.29	624	0.7143	1466	1622
JU775_20171011_oligo_Nuc_rDNA_004	4	66	57	203	815	2400	1191.5	2	1	16	500	114.33	736	0.6667	1699	223
JU775_20171011_oligo_Nuc_rDNA_004	4	66	57	203	815	2400	1191.5	2	2	18	491	132.39	713	0.5333	1707	228
JU775_20171011_oligo_Nuc_rDNA_004	4	66	58	204	896	2350	936.6	2	1	14	434	102.32	601	0.1333	1700	1155
JU775_20171011_oligo_Nuc_rDNA_004	4	66	58	204	896	2350	936.6	2	2	18	433	110.59	603	0.4	1722	1136
JU775_20171011_oligo_Nuc_rDNA_004	4	66	62	208	682	2540	1214	1	1	16	498	80.14	649	0.7857	1841	725
JU775_20171011_oligo_Nuc_rDNA_004	4	66	63	209	595	2590	1188.1	2	1	10	349	36.66	402	0.6923	1856	592
JU775_20171011_oligo_Nuc_rDNA_004	4	66	63	209	595	2590	1188.1	2	2	13	417	89.6	569	0.6923	1860	585
JU775_20171011_oligo_Nuc_rDNA_004	4	66	64	210	400	1450	269	0	NaN	NaN	NaN	NaN	NaN	NaN	NaN	NaN
JU775_20171011_oligo_Nuc_rDNA_004	4	66	65	211	809	2580	1140.5	2	1	20	490	106.6	718	0.4	1942	1595
JU775_20171011_oligo_Nuc_rDNA_004	4	66	65	211	809	2580	1140.5	2	2	16	472	102.61	665	0.8667	1948	1585
JU775_20171011_oligo_Nuc_rDNA_004	4	66	66	212	801	2540	1170.9	1	1	24	587	154.79	944	0.8	1951	283
JU775_20171011_oligo_Nuc_rDNA_005	5	71	2	214	463	2560	987	1	1	9	293	37.48	375	0.9091	75	104
JU775_20171011_oligo_Nuc_rDNA_005	5	71	6	218	647	1610	353.4	1	1	13	445	45.01	502	0.8462	332	398
JU775_20171011_oligo_Nuc_rDNA_005	5	71	7	219	587	2520	1101.5	1	1	21	444	81.88	618	0.8333	345	1197
JU775_20171011_oligo_Nuc_rDNA_005	5	71	9	221	821	2590	1136.2	1	1	21	457	105.79	653	0.4	371	1993
JU775_20171011_oligo_Nuc_rDNA_005	5	71	10	222	673	2450	1162.6	2	1	15	549	90.46	696	0.3571	400	759
JU775_20171011_oligo_Nuc_rDNA_005	5	71	10	222	673	2450	1162.6	2	2	13	506	74.13	619	1	408	753
JU775_20171011_oligo_Nuc_rDNA_005	5	71	11	223	782	2520	1184.3	2	1	14	476	60.99	569	0.5333	469	1067
JU775_20171011_oligo_Nuc_rDNA_005	5	71	11	223	782	2520	1184.3	2	2	14	489	76.25	612	0.8667	477	1058
JU775_20171011_oligo_Nuc_rDNA_005	5	71	12	224	497	2340	845.2	0	NaN	NaN	NaN	NaN	NaN	NaN	NaN	NaN
JU775_20171011_oligo_Nuc_rDNA_005	5	71	14	226	469	2830	1124.9	2	1	10	362	37.7	417	0.7273	519	1523
JU775_20171011_oligo_Nuc_rDNA_005	5	71	14	226	469	2830	1124.9	2	2	10	384	60.33	469	0.5455	528	1516
JU775_20171011_oligo_Nuc_rDNA_005	5	71	15	227	518	2460	938.3	2	1	11	295	41.93	371	0.75	547	150
JU775_20171011_oligo_Nuc_rDNA_005	5	71	15	227	518	2460	938.3	2	2	14	342	53.47	427	0.1667	554	164
JU775_20171011_oligo_Nuc_rDNA_005	5	71	16	228	413	2570	956.8	1	1	17	447	71.55	585	0.4	559	967
JU775_20171011_oligo_Nuc_rDNA_005	5	71	17	229	736	2600	1213.4	2	1	11	343	46.71	439	0.9333	562	218
JU775_20171011_oligo_Nuc_rDNA_005	5	71	17	229	736	2600	1213.4	2	2	16	389	82.26	572	0.6	569	218
JU775_20171011_oligo_Nuc_rDNA_005	5	71	19	231	814	2420	731.8	1	1	18	610	100.78	796	0.4667	581	609
JU775_20171011_oligo_Nuc_rDNA_005	5	71	20	232	537	2460	1044.5	2	1	11	329	43.58	411	0.8333	578	146
JU775_20171011_oligo_Nuc_rDNA_005	5	71	20	232	537	2460	1044.5	2	2	12	343	56.7	433	0.4167	580	155
JU775_20171011_oligo_Nuc_rDNA_005	5	71	21	233	635	2680	1209.2	1	1	17	385	37.6	446	0.5385	585	1568
JU775_20171011_oligo_Nuc_rDNA_005	5	71	22	234	762	2490	1190.1	2	1	9	515	47.15	579	0.5333	660	1406
JU775_20171011_oligo_Nuc_rDNA_005	5	71	22	234	762	2490	1190.1	2	2	12	561	71.01	671	0.4667	671	1398
JU775_20171011_oligo_Nuc_rDNA_005	5	71	26	238	777	2590	1142.3	1	1	12	320	39.96	387	0.8	746	274
JU775_20171011_oligo_Nuc_rDNA_005	5	71	27	239	795	2820	1175.6	1	1	23	442	86.08	593	0.6	797	445
JU775_20171011_oligo_Nuc_rDNA_005	5	71	28	240	610	2410	1043.4	1	1	15	356	34.93	428	0.5385	793	54
JU775_20171011_oligo_Nuc_rDNA_005	5	71	29	241	827	1570	324.4	0	NaN	NaN	NaN	NaN	NaN	NaN	NaN	NaN
JU775_20171011_oligo_Nuc_rDNA_005	5	71	33	245	672	2730	1143.6	1	1	11	315	47.76	407	0.3571	928	1815
JU775_20171011_oligo_Nuc_rDNA_005	5	71	34	246	477	2870	1187.9	2	1	14	393	71.53	514	0.5455	947	436
JU775_20171011_oligo_Nuc_rDNA_005	5	71	34	246	477	2870	1187.9	2	2	9	325	39.31	394	0.8182	955	439
JU775_20171011_oligo_Nuc_rDNA_005	5	71	36	248	468	2670	1049	1	1	18	402	92.57	556	0.7273	991	94
JU775_20171011_oligo_Nuc_rDNA_005	5	71	38	250	471	2740	1197.2	1	1	20	464	88.19	632	0.6364	1020	577
JU775_20171011_oligo_Nuc_rDNA_005	5	71	39	251	712	2640	1215.5	1	1	22	466	89.33	625	1	1060	538
JU775_20171011_oligo_Nuc_rDNA_005	5	71	40	252	490	2690	1109.6	1	1	26	385	62.14	487	0.3636	1059	158
JU775_20171011_oligo_Nuc_rDNA_005	5	71	42	254	703	2500	1134.9	2	1	20	470	100.37	673	0.7857	1185	638
JU775_20171011_oligo_Nuc_rDNA_005	5	71	42	254	703	2500	1134.9	2	2	14	410	69.4	515	0.4286	1195	634
JU775_20171011_oligo_Nuc_rDNA_005	5	71	44	256	665	1630	378.4	0	NaN	NaN	NaN	NaN	NaN	NaN	NaN	NaN
JU775_20171011_oligo_Nuc_rDNA_005	5	71	45	257	873	2560	1216.6	1	1	33	487	94.03	749	0.9375	1266	1217
JU775_20171011_oligo_Nuc_rDNA_005	5	71	49	261	708	2760	1166.7	1	1	22	433	89.7	579	0.7143	1342	1351
JU775_20171011_oligo_Nuc_rDNA_005	5	71	50	262	411	2260	914.5	1	1	15	367	52.97	440	0.9	1361	690
JU775_20171011_oligo_Nuc_rDNA_005	5	71	53	265	771	1920	725.9	1	1	16	344	42.99	407	0.8333	1511	524
JU775_20171011_oligo_Nuc_rDNA_005	5	71	56	268	653	2620	985.3	2	1	13	332	51.37	458	0.2308	1615	1907
JU775_20171011_oligo_Nuc_rDNA_005	5	71	56	268	653	2620	985.3	2	2	14	353	51.33	417	0.6923	1623	1914
JU775_20171011_oligo_Nuc_rDNA_005	5	71	57	269	757	2302	970.6	1	1	11	426	33.27	483	0.5	1663	352
JU775_20171011_oligo_Nuc_rDNA_005	5	71	61	273	804	2570	1014.9	2	1	15	350	58.61	440	0.4286	1839	481
JU775_20171011_oligo_Nuc_rDNA_005	5	71	61	273	804	2570	1014.9	2	2	16	315	58.38	427	0.2143	1849	462
JU775_20171011_oligo_Nuc_rDNA_005	5	71	62	274	781	2590	1200.2	2	1	15	383	79.44	519	0.4667	1895	373
JU775_20171011_oligo_Nuc_rDNA_005	5	71	62	274	781	2590	1200.2	2	2	16	395	70.29	521	0.6667	1903	369
JU775_20171011_oligo_Nuc_rDNA_005	5	71	63	275	668	2530	1058.6	2	1	14	351	60.44	457	0.5	1904	120
JU775_20171011_oligo_Nuc_rDNA_005	5	71	63	275	668	2530	1058.6	2	2	13	368	76.22	501	0.7143	1911	116
JU775_20171011_oligo_Nuc_rDNA_005	5	71	64	276	840	2550	1116.8	2	1	15	353	58.85	450	0.6	1905	72
JU775_20171011_oligo_Nuc_rDNA_005	5	71	64	276	840	2550	1116.8	2	2	14	328	68.5	463	0.4667	1918	68
JU775_20171011_oligo_Nuc_rDNA_005	5	71	66	278	641	2430	1005.8	1	1	25	383	67.19	497	0.8462	1928	1875
JU775_20171011_oligo_Nuc_rDNA_005	5	71	69	281	790	2560	1073.3	2	1	14	349	45.78	426	0.8	1978	1917
JU775_20171011_oligo_Nuc_rDNA_005	5	71	69	281	790	2560	1073.3	2	2	15	394	76.9	554	0.1333	1980	1904
JU775_20171011_oligo_Nuc_rDNA_005	5	71	70	282	672	2660	1169.4	2	1	15	426	84.3	554	0.2857	1984	606
JU775_20171011_oligo_Nuc_rDNA_005	5	71	70	282	672	2660	1169.4	2	2	15	394	78.88	529	0.4286	1987	600
JU775_20171011_oligo_Nuc_rDNA_006	6	59	1	284	755	2370	1230.2	2	1	18	440	103.4	599	0.7333	82	824
JU775_20171011_oligo_Nuc_rDNA_006	6	59	1	284	755	2370	1230.2	2	2	17	467	112.57	697	0.6	82	834
JU775_20171011_oligo_Nuc_rDNA_006	6	59	3	286	578	2060	942.3	1	1	27	358	61.92	507	0.5833	102	223
JU775_20171011_oligo_Nuc_rDNA_006	6	59	4	287	476	2120	745	2	1	13	308	39	395	0.9	153	200
JU775_20171011_oligo_Nuc_rDNA_006	6	59	4	287	476	2120	745	2	2	18	375	76.49	511	0.4	160	188
JU775_20171011_oligo_Nuc_rDNA_006	6	59	6	289	455	2100	897.4	1	1	17	384	71.01	519	0.6	165	73
JU775_20171011_oligo_Nuc_rDNA_006	6	59	9	292	518	2230	856.2	1	1	21	546	164.24	881	0.5	392	118
JU775_20171011_oligo_Nuc_rDNA_006	6	59	14	297	858	2640	1240.9	2	1	22	525	138.48	838	0.5625	515	347
JU775_20171011_oligo_Nuc_rDNA_006	6	59	14	297	858	2640	1240.9	2	2	23	604	175.61	1037	0.4375	532	351
JU775_20171011_oligo_Nuc_rDNA_006	6	59	16	299	641	1390	330.9	0	NaN	NaN	NaN	NaN	NaN	NaN	NaN	NaN
JU775_20171011_oligo_Nuc_rDNA_006	6	59	19	302	678	2430	1160.3	1	1	20	586	160.18	886	0.6429	613	1356
JU775_20171011_oligo_Nuc_rDNA_006	6	59	21	304	795	2480	1132.4	2	1	17	476	119.51	638	0.4667	669	840
JU775_20171011_oligo_Nuc_rDNA_006	6	59	21	304	795	2480	1132.4	2	2	18	540	112.15	783	0.4667	670	847
JU775_20171011_oligo_Nuc_rDNA_006	6	59	22	305	729	2450	1284.8	2	1	20	485	124.78	728	0.6	726	1378
JU775_20171011_oligo_Nuc_rDNA_006	6	59	22	305	729	2450	1284.8	2	2	18	484	133.21	705	0.5333	732	1388
JU775_20171011_oligo_Nuc_rDNA_006	6	59	26	309	505	1560	429.2	1	1	21	526	139.82	868	0.4444	859	442
JU775_20171011_oligo_Nuc_rDNA_006	6	59	28	311	648	2360	1206.6	2	1	16	459	101.04	650	0.6429	917	397
JU775_20171011_oligo_Nuc_rDNA_006	6	59	28	311	648	2360	1206.6	2	2	16	452	91.97	633	0.5714	923	387
JU775_20171011_oligo_Nuc_rDNA_006	6	59	29	312	850	2490	1167.5	2	1	18	441	87.58	581	0.6667	983	1772
JU775_20171011_oligo_Nuc_rDNA_006	6	59	29	312	850	2490	1167.5	2	2	10	336	26.97	362	0.5333	992	1784
JU775_20171011_oligo_Nuc_rDNA_006	6	59	31	314	785	2470	1276.3	2	1	15	435	72.02	548	0.6	1088	389
JU775_20171011_oligo_Nuc_rDNA_006	6	59	31	314	785	2470	1276.3	2	2	15	509	83.99	656	0.6667	1092	395
JU775_20171011_oligo_Nuc_rDNA_006	6	59	32	315	794	2240	879	2	1	14	509	84.46	657	0.4	1103	490
JU775_20171011_oligo_Nuc_rDNA_006	6	59	32	315	794	2240	879	2	2	9	417	70.55	508	0.4	1120	504
JU775_20171011_oligo_Nuc_rDNA_006	6	59	34	317	832	2380	1202.6	1	1	24	587	191.57	1019	0.375	1172	1215
JU775_20171011_oligo_Nuc_rDNA_006	6	59	40	323	796	1820	703.6	1	1	17	505	74.35	665	0.4	1421	883
JU775_20171011_oligo_Nuc_rDNA_006	6	59	43	326	432	2460	1112.6	1	1	23	399	68.44	509	0.5455	1471	150
JU775_20171011_oligo_Nuc_rDNA_006	6	59	47	330	841	2420	1234.7	1	1	19	584	181.52	883	0.5625	1644	352
JU775_20171011_oligo_Nuc_rDNA_006	6	59	52	335	549	1360	244.4	0	NaN	NaN	NaN	NaN	NaN	NaN	NaN	NaN
JU775_20171011_oligo_Nuc_rDNA_006	6	59	53	336	892	2270	1187.3	1	1	33	636	171.54	944	0.6875	1749	636
JU775_20171011_oligo_Nuc_rDNA_006	6	59	54	337	624	2320	1107.2	2	1	15	358	81.97	518	0.7857	1790	586
JU775_20171011_oligo_Nuc_rDNA_006	6	59	54	337	624	2320	1107.2	2	2	16	399	81.9	537	0.5714	1799	588
JU775_20171011_oligo_Nuc_rDNA_006	6	59	57	340	877	2490	1258.7	2	1	19	519	128.61	715	0.75	1870	1018
JU775_20171011_oligo_Nuc_rDNA_006	6	59	57	340	877	2490	1258.7	2	2	18	549	141.99	855	0.4375	1878	1015
JU775_20171011_oligo_Nuc_rDNA_006	6	59	58	341	750	2180	867	2	1	14	457	109.2	695	0.3571	1876	1560
JU775_20171011_oligo_Nuc_rDNA_006	6	59	58	341	750	2180	867	2	2	17	454	90.5	609	0.7857	1880	1555
JU775_20171011_oligo_Nuc_rDNA_007	7	63	1	343	642	2260	778.9	2	1	16	413	96.8	603	0.9231	26	271
JU775_20171011_oligo_Nuc_rDNA_007	7	63	1	343	642	2260	778.9	2	2	14	447	98.02	600	0.3077	37	270
JU775_20171011_oligo_Nuc_rDNA_007	7	63	2	344	535	2700	1154.2	1	1	27	512	99.45	679	0.5833	55	374
JU775_20171011_oligo_Nuc_rDNA_007	7	63	5	347	712	1970	581.3	2	1	16	503	140.42	722	0.3077	90	93
JU775_20171011_oligo_Nuc_rDNA_007	7	63	5	347	712	1970	581.3	2	2	14	398	86.67	536	0.3077	110	89
JU775_20171011_oligo_Nuc_rDNA_007	7	63	6	348	717	2420	1160.9	2	1	12	445	84.09	574	0.5714	119	63
JU775_20171011_oligo_Nuc_rDNA_007	7	63	6	348	717	2420	1160.9	2	2	13	436	74.44	548	0.6429	127	64
JU775_20171011_oligo_Nuc_rDNA_007	7	63	7	349	577	2450	1065.5	1	1	17	444	104	611	0.5385	203	1805
JU775_20171011_oligo_Nuc_rDNA_007	7	63	10	352	772	2320	923	1	1	18	440	88.53	597	0.2667	293	244
JU775_20171011_oligo_Nuc_rDNA_007	7	63	13	355	686	2320	1027	2	1	16	401	80.88	546	0.8571	371	686
JU775_20171011_oligo_Nuc_rDNA_007	7	63	13	355	686	2320	1027	2	2	15	367	37.51	455	0.1429	385	691
JU775_20171011_oligo_Nuc_rDNA_007	7	63	14	356	847	2450	1194	1	1	19	751	225.68	1136	0.8125	414	1277
JU775_20171011_oligo_Nuc_rDNA_007	7	63	15	357	516	2570	1265.8	1	1	25	502	87.86	683	0.8333	442	1158
JU775_20171011_oligo_Nuc_rDNA_007	7	63	21	363	578	2550	1205.1	2	1	15	416	78.44	554	0.4167	674	1160
JU775_20171011_oligo_Nuc_rDNA_007	7	63	21	363	578	2550	1205.1	2	2	11	348	63.84	414	0.6667	676	1147
JU775_20171011_oligo_Nuc_rDNA_007	7	63	22	364	493	1520	396.6	1	1	16	375	56.95	456	0.8889	679	293
JU775_20171011_oligo_Nuc_rDNA_007	7	63	23	365	677	2500	1251.8	1	1	22	807	232.09	1233	0.7857	692	1066
JU775_20171011_oligo_Nuc_rDNA_007	7	63	25	367	604	2520	1147.8	2	1	15	408	93.12	592	0.6923	740	1159
JU775_20171011_oligo_Nuc_rDNA_007	7	63	25	367	604	2520	1147.8	2	2	16	443	99.15	599	0.4615	752	1158
JU775_20171011_oligo_Nuc_rDNA_007	7	63	26	368	446	2010	929.3	2	1	9	445	37.58	511	0.6364	792	2028
JU775_20171011_oligo_Nuc_rDNA_007	7	63	26	368	446	2010	929.3	2	2	10	460	33.76	509	0.1818	795	2017
JU775_20171011_oligo_Nuc_rDNA_007	7	63	31	373	783	2430	1212.6	2	1	13	529	101.96	697	0.5714	919	709
JU775_20171011_oligo_Nuc_rDNA_007	7	63	31	373	783	2430	1212.6	2	2	13	559	101.29	707	0.6429	930	708
JU775_20171011_oligo_Nuc_rDNA_007	7	63	34	376	781	2280	1217.1	1	1	25	607	132.69	804	0.7143	1018	1405
JU775_20171011_oligo_Nuc_rDNA_007	7	63	35	377	626	2340	879.4	2	1	19	489	143.5	757	0.3077	1013	208
JU775_20171011_oligo_Nuc_rDNA_007	7	63	35	377	626	2340	879.4	2	2	11	411	88.48	579	0.8462	1018	202
JU775_20171011_oligo_Nuc_rDNA_007	7	63	37	379	588	2600	1224	2	1	13	423	62.49	521	0.6923	1106	1661
JU775_20171011_oligo_Nuc_rDNA_007	7	63	37	379	588	2600	1224	2	2	12	415	48.91	527	0.6154	1116	1658
JU775_20171011_oligo_Nuc_rDNA_007	7	63	38	380	725	2520	1127.8	1	1	14	419	87.82	575	0.7857	1157	1674
JU775_20171011_oligo_Nuc_rDNA_007	7	63	40	382	692	2470	1223.6	1	1	16	431	63.71	541	0.5714	1174	683
JU775_20171011_oligo_Nuc_rDNA_007	7	63	43	385	822	2440	1207	0	NaN	NaN	NaN	NaN	NaN	NaN	NaN	NaN
JU775_20171011_oligo_Nuc_rDNA_007	7	63	44	386	403	1530	390.2	0	NaN	NaN	NaN	NaN	NaN	NaN	NaN	NaN
JU775_20171011_oligo_Nuc_rDNA_007	7	63	45	387	836	2371	858.8	1	1	17	433	80.33	540	0.4	1249	824
JU775_20171011_oligo_Nuc_rDNA_007	7	63	46	388	697	2530	1257.4	1	1	13	398	65.18	514	0.4286	1262	1500
JU775_20171011_oligo_Nuc_rDNA_007	7	63	47	389	806	2500	1055.7	2	1	13	407	66.87	522	0.8	1297	68
JU775_20171011_oligo_Nuc_rDNA_007	7	63	47	389	806	2500	1055.7	2	2	13	425	84.87	562	0.6667	1302	74
JU775_20171011_oligo_Nuc_rDNA_007	7	63	48	390	405	2180	716.6	2	1	9	371	48.21	438	0.5	1357	473
JU775_20171011_oligo_Nuc_rDNA_007	7	63	48	390	405	2180	716.6	2	2	11	375	45.55	437	0.3	1362	468
JU775_20171011_oligo_Nuc_rDNA_007	7	63	49	391	670	1850	708.5	0	NaN	NaN	NaN	NaN	NaN	NaN	NaN	NaN
JU775_20171011_oligo_Nuc_rDNA_007	7	63	56	398	883	2530	1239.1	2	1	13	395	98.55	621	0.625	1732	1772
JU775_20171011_oligo_Nuc_rDNA_007	7	63	56	398	883	2530	1239.1	2	2	15	399	76.88	540	0.5625	1746	1774
JU775_20171011_oligo_Nuc_rDNA_007	7	63	57	399	477	2310	1000.2	0	NaN	NaN	NaN	NaN	NaN	NaN	NaN	NaN
JU775_20171011_oligo_Nuc_rDNA_007	7	63	58	400	882	1460	335.3	0	NaN	NaN	NaN	NaN	NaN	NaN	NaN	NaN
JU775_20171011_oligo_Nuc_rDNA_007	7	63	59	401	649	2550	1112.7	2	1	10	379	56.4	456	0.4286	1779	1576
JU775_20171011_oligo_Nuc_rDNA_007	7	63	59	401	649	2550	1112.7	2	2	12	380	53.26	465	0.9286	1783	1582
JU775_20171011_oligo_Nuc_rDNA_007	7	63	60	402	762	2550	1200.8	2	1	11	428	69.2	546	0.6667	1948	621
JU775_20171011_oligo_Nuc_rDNA_007	7	63	60	402	762	2550	1200.8	2	2	13	442	101.95	652	0.6667	1953	620
JU775_20171011_oligo_Nuc_rDNA_007	7	63	61	403	661	2500	1139	1	1	18	403	79.52	573	0.5	1959	878
JU775_20171011_oligo_Nuc_rDNA_007	7	63	62	404	627	2380	987.6	1	1	12	398	47.33	482	0.6429	2022	304
JU775_20171011_oligo_Nuc_rDNA_007	7	63	63	405	767	2460	1109.4	2	1	13	372	76.43	489	0.3333	2014	1747
JU775_20171011_oligo_Nuc_rDNA_007	7	63	63	405	767	2460	1109.4	2	2	14	415	73.67	547	0.4	2014	1761
JU775_20171011_oligo_Nuc_rDNA_008	8	60	1	406	631	1840	678.6	0	NaN	NaN	NaN	NaN	NaN	NaN	NaN	NaN
JU775_20171011_oligo_Nuc_rDNA_008	8	60	2	407	456	2090	636.6	0	NaN	NaN	NaN	NaN	NaN	NaN	NaN	NaN
JU775_20171011_oligo_Nuc_rDNA_008	8	60	7	412	712	2540	1201.3	0	NaN	NaN	NaN	NaN	NaN	NaN	NaN	NaN
JU775_20171011_oligo_Nuc_rDNA_008	8	60	11	416	454	1310	170.6	0	NaN	NaN	NaN	NaN	NaN	NaN	NaN	NaN
JU775_20171011_oligo_Nuc_rDNA_008	8	60	13	418	507	2080	662.8	1	1	12	267	38.75	335	0.7273	484	35
JU775_20171011_oligo_Nuc_rDNA_008	8	60	15	420	844	2600	1245	2	1	17	515	127.8	720	0.5333	489	962
JU775_20171011_oligo_Nuc_rDNA_008	8	60	15	420	844	2600	1245	2	2	19	497	119.12	731	0.8667	493	957
JU775_20171011_oligo_Nuc_rDNA_008	8	60	16	421	706	2260	1079	0	NaN	NaN	NaN	NaN	NaN	NaN	NaN	NaN
JU775_20171011_oligo_Nuc_rDNA_008	8	60	17	422	645	2560	1218.3	1	1	19	482	73.07	601	0.5385	522	1495
JU775_20171011_oligo_Nuc_rDNA_008	8	60	18	423	417	1810	662.6	1	1	10	335	35.66	392	1	610	140
JU775_20171011_oligo_Nuc_rDNA_008	8	60	20	425	565	2220	1074.8	1	1	20	467	101.26	643	0.75	695	985
JU775_20171011_oligo_Nuc_rDNA_008	8	60	21	426	895	2570	1235.3	2	1	14	352	53.29	425	0.5333	761	604
JU775_20171011_oligo_Nuc_rDNA_008	8	60	21	426	895	2570	1235.3	2	2	16	373	68.82	482	0.6667	775	604
JU775_20171011_oligo_Nuc_rDNA_008	8	60	22	427	575	2690	1095.7	2	1	15	355	57.43	478	0.5385	771	1424
JU775_20171011_oligo_Nuc_rDNA_008	8	60	22	427	575	2690	1095.7	2	2	15	393	65	486	0.6154	779	1434
JU775_20171011_oligo_Nuc_rDNA_008	8	60	23	428	398	1590	386	0	NaN	NaN	NaN	NaN	NaN	NaN	NaN	NaN
JU775_20171011_oligo_Nuc_rDNA_008	8	60	24	429	673	2420	1003.4	2	1	19	379	90.12	549	0.6429	860	474
JU775_20171011_oligo_Nuc_rDNA_008	8	60	24	429	673	2420	1003.4	2	2	17	379	96.16	532	0.5714	865	484
JU775_20171011_oligo_Nuc_rDNA_008	8	60	25	430	783	2410	1212.4	2	1	15	396	73	550	0.8667	994	1970
JU775_20171011_oligo_Nuc_rDNA_008	8	60	25	430	783	2410	1212.4	2	2	15	460	116.36	701	0.5333	998	1959
JU775_20171011_oligo_Nuc_rDNA_008	8	60	26	431	561	1920	734.2	1	1	11	373	44.14	437	0.6667	1001	1913
JU775_20171011_oligo_Nuc_rDNA_008	8	60	27	432	884	2760	1162.8	2	1	17	492	127.95	692	0.375	1001	1390
JU775_20171011_oligo_Nuc_rDNA_008	8	60	27	432	884	2760	1162.8	2	2	16	447	101.69	634	0.5625	1008	1385
JU775_20171011_oligo_Nuc_rDNA_008	8	60	28	433	639	2540	1232.5	2	1	13	365	88.14	500	0.9231	1055	1080
JU775_20171011_oligo_Nuc_rDNA_008	8	60	28	433	639	2540	1232.5	2	2	11	345	53.16	460	0.7692	1060	1081
JU775_20171011_oligo_Nuc_rDNA_008	8	60	29	434	745	2110	912.7	1	1	13	371	41.69	460	0.5333	1074	1687
JU775_20171011_oligo_Nuc_rDNA_008	8	60	30	435	714	2490	1212.5	1	1	28	401	83.03	575	0.8667	1109	69
JU775_20171011_oligo_Nuc_rDNA_008	8	60	31	436	324	2340	873.1	0	NaN	NaN	NaN	NaN	NaN	NaN	NaN	NaN
JU775_20171011_oligo_Nuc_rDNA_008	8	60	32	437	682	2540	1129.6	2	1	10	317	35.67	362	0.7143	1169	1213
JU775_20171011_oligo_Nuc_rDNA_008	8	60	32	437	682	2540	1129.6	2	2	16	387	68.86	527	0.6429	1174	1218
JU775_20171011_oligo_Nuc_rDNA_008	8	60	33	438	597	1760	569.6	0	NaN	NaN	NaN	NaN	NaN	NaN	NaN	NaN
JU775_20171011_oligo_Nuc_rDNA_008	8	60	40	445	776	2540	1239.5	1	1	29	526	128.74	773	0.625	1342	725
JU775_20171011_oligo_Nuc_rDNA_008	8	60	41	446	734	2480	1157.1	2	1	11	344	56.26	433	0.5714	1352	1026
JU775_20171011_oligo_Nuc_rDNA_008	8	60	41	446	734	2480	1157.1	2	2	10	323	50.56	426	0.8571	1359	1029
JU775_20171011_oligo_Nuc_rDNA_008	8	60	42	447	727	2330	818.4	1	1	11	339	44.32	393	0.1429	1361	1913
JU775_20171011_oligo_Nuc_rDNA_008	8	60	44	449	696	2510	1200.3	2	1	10	304	48.03	383	0.5	1414	1121
JU775_20171011_oligo_Nuc_rDNA_008	8	60	44	449	696	2510	1200.3	2	2	14	346	66.68	468	0.7143	1426	1123
JU775_20171011_oligo_Nuc_rDNA_008	8	60	45	450	634	2630	975.3	1	1	18	435	93.87	695	0.8462	1452	475
JU775_20171011_oligo_Nuc_rDNA_008	8	60	47	452	484	1440	299.2	0	NaN	NaN	NaN	NaN	NaN	NaN	NaN	NaN
JU775_20171011_oligo_Nuc_rDNA_008	8	60	49	454	802	2590	1221	1	1	18	421	93.44	558	0.8667	1549	171
JU775_20171011_oligo_Nuc_rDNA_008	8	60	50	455	690	2590	1228.1	2	1	17	461	102.43	648	0.5	1576	1358
JU775_20171011_oligo_Nuc_rDNA_008	8	60	50	455	690	2590	1228.1	2	2	17	459	88.46	637	0.7143	1580	1368
JU775_20171011_oligo_Nuc_rDNA_008	8	60	51	456	632	2100	887.4	0	NaN	NaN	NaN	NaN	NaN	NaN	NaN	NaN
JU775_20171011_oligo_Nuc_rDNA_008	8	60	52	457	887	2530	1175.7	2	1	14	362	47.28	434	0.8125	1685	1373
JU775_20171011_oligo_Nuc_rDNA_008	8	60	52	457	887	2530	1175.7	2	2	19	435	97.17	625	0.5625	1690	1381
JU775_20171011_oligo_Nuc_rDNA_008	8	60	57	462	643	2660	1192.3	2	1	10	339	42.58	384	0.6154	1824	716
JU775_20171011_oligo_Nuc_rDNA_008	8	60	57	462	643	2660	1192.3	2	2	9	329	30.49	377	0.4615	1838	710
JU775_20171011_oligo_Nuc_rDNA_008	8	60	58	463	692	2500	1138	2	1	15	347	65.99	475	0.5714	1957	760
JU775_20171011_oligo_Nuc_rDNA_008	8	60	58	463	692	2500	1138	2	2	10	314	55.25	418	0.7857	1959	769
JU775_20171011_oligo_Nuc_rDNA_008	8	60	60	465	682	2430	1044.5	2	1	12	316	53.28	405	0.2857	2028	660
JU775_20171011_oligo_Nuc_rDNA_008	8	60	60	465	682	2430	1044.5	2	2	9	313	32.37	349	0.2143	2034	661

## Sheet: MY1_Rep1
DatasetName	ImageIndex	TotalCellCount	CellIndex	GlobalCellIndex	NuclearSize	AvgNuclearIntensity	std_NuclearIntensity	Cy5_NumSpotsPerCell	Cy5_SpotIndex	Cy5_SpotSize	Cy5_MeanSpotIntensity	Cy5_std_SpotIntensity	Cy5_MaxSpotIntensity	Cy5_SpotRRD	Cy5_Spot_centroidX	Cy5_Spot_centroidY
1	1	81	1	1	628	473.108	126.9	2	1	43	2434	948.05	4095	0.2857	33	693
1	1	81	1	1	628	473.108	126.9	2	2	41	2264	901.75	4095	0.2857	40	676
1	1	81	2	2	731	489.068	154.1	2	1	41	2338	872.82	4095	0.4667	145	1864
1	1	81	2	2	731	489.068	154.1	2	2	44	2088	761.35	3866	0.4	149	1850
1	1	81	3	3	1096	542.883	227.4	1	1	73	3337	839.11	4095	0.4444	194	1086
1	1	81	4	4	843	498.377	196.5	2	1	43	2714	992.22	4095	0.4375	258	1760
1	1	81	4	4	843	498.377	196.5	2	2	44	2800	907.79	4095	0.4375	262	1770
1	1	81	5	5	1166	556.437	241.8	2	1	44	2671	908.93	4095	0.6842	255	759
1	1	81	5	5	1166	556.437	241.8	2	2	46	2660	1040.83	4095	0.4211	261	744
1	1	81	6	6	689	502.486	194.8	1	1	48	2297	796.99	4095	0.7143	274	257
1	1	81	7	7	1659	525.137	206.9	2	1	57	3315	764.02	4095	0.5294	279	1748
1	1	81	7	7	1659	525.137	206.9	2	2	77	2915	945.73	4095	0.6471	294	1719
1	1	81	8	8	1108	553.933	249.3	1	1	66	3224	853.79	4095	0.6111	289	1260
1	1	81	9	9	1012	567.056	277.2	2	1	38	2922	889.3	4095	0.8889	310	600
1	1	81	9	9	1012	567.056	277.2	2	2	39	2707	1021.64	4095	0.5556	312	591
1	1	81	10	10	798	518.301	213.6	2	1	42	2228	962.76	4095	0.4375	319	840
1	1	81	10	10	798	518.301	213.6	2	2	43	2291	963.63	4095	0.5	331	848
1	1	81	11	11	758	519.514	230	2	1	47	2952	973.12	4095	0.6	330	985
1	1	81	11	11	758	519.514	230	2	2	48	2882	987.45	4095	0.7333	333	996
1	1	81	12	12	768	493.053	181.4	2	1	41	2089	812.31	3878	0.3333	333	905
1	1	81	12	12	768	493.053	181.4	2	2	44	2270	862.66	4095	0.4667	344	890
1	1	81	13	13	687	512.808	208.4	2	1	41	1883	784.56	3540	0.5	342	224
1	1	81	13	13	687	512.808	208.4	2	2	41	2114	925.89	4095	0.5	345	238
1	1	81	14	14	696	520.2	223.4	1	1	71	3115	864.51	4095	0.6429	350	2012
1	1	81	15	15	775	532.133	247	2	1	46	2706	1030.99	4095	0.6	395	1220
1	1	81	15	15	775	532.133	247	2	2	44	2880	1020.09	4095	0.6	401	1233
1	1	81	16	16	759	473.211	126.1	1	1	57	3322	824.12	4095	0.2667	415	772
1	1	81	17	17	1216	629.118	374.9	2	1	57	3182	882.52	4095	0.5263	423	1137
1	1	81	17	17	1216	629.118	374.9	2	2	53	3105	919.98	4095	0.4737	442	1129
1	1	81	18	18	1358	537.184	203	2	1	60	3422	775.83	4095	0.4286	485	758
1	1	81	18	18	1358	537.184	203	2	2	67	3459	769.83	4095	0.7143	489	741
1	1	81	19	19	1489	513.789	169.9	1	1	85	3634	666.53	4095	0.4762	508	569
1	1	81	20	20	776	518.323	222.3	2	1	42	2965	982.91	4095	0.3333	491	1288
1	1	81	20	20	776	518.323	222.3	2	2	41	3016	956.5	4095	0.4667	499	1281
1	1	81	21	21	1411	550.162	234.6	1	1	95	3548	708.81	4095	0.45	520	633
1	1	81	22	22	793	503.743	184.3	1	1	49	2873	917	4095	0.8	531	1985
1	1	81	23	23	731	495.531	178.5	2	1	42	2363	1012.54	4095	0.4	556	133
1	1	81	23	23	731	495.531	178.5	2	2	42	2217	886.27	4095	0.6667	568	126
1	1	81	24	24	762	520.419	217.5	2	1	47	2843	983.27	4095	0.4667	572	1366
1	1	81	24	24	762	520.419	217.5	2	2	49	2765	986	4095	0.4667	583	1379
1	1	81	25	25	800	541.847	255.6	1	1	74	2600	970.95	4095	0.625	579	1093
1	1	81	26	26	772	515.029	208.2	1	1	57	3211	892.21	4095	0.4	579	954
1	1	81	27	27	762	533.547	247.7	2	1	41	2969	1043.04	4095	0.4667	609	1265
1	1	81	27	27	762	533.547	247.7	2	2	40	3085	833.34	4095	0.8	614	1273
1	1	81	28	28	790	512.51	200.1	2	1	43	2969	965.95	4095	0.875	616	1631
1	1	81	28	28	790	512.51	200.1	2	2	45	2965	892.81	4095	0.375	622	1640
1	1	81	29	29	668	522.94	234	2	1	36	2669	1034.89	4095	0.9286	621	160
1	1	81	29	29	668	522.94	234	2	2	37	2586	877.92	4095	0.5	629	162
1	1	81	30	30	832	536.877	251.4	1	1	70	3104	900.5	4095	0.6875	703	1310
1	1	81	31	31	714	523.92	234.6	1	1	79	2869	916.67	4095	0.6	720	353
1	1	81	32	32	1180	599.037	323.4	1	1	49	2939	919.01	4095	0.3684	737	1900
1	1	81	33	33	794	499.793	172.1	2	1	46	2761	1014.93	4095	0.3125	731	1551
1	1	81	33	33	794	499.793	172.1	2	2	46	2886	986.71	4095	0.375	750	1551
1	1	81	34	34	1174	600.003	320.7	1	1	60	3295	874.54	4095	0.4737	749	986
1	1	81	35	35	781	536.773	258.1	1	1	59	3262	929.2	4095	0.4375	803	1266
1	1	81	36	36	746	535.772	247.4	2	1	43	2768	1057.59	4095	0.5333	805	1052
1	1	81	36	36	746	535.772	247.4	2	2	45	2881	1013.11	4095	0.4667	816	1059
1	1	81	37	37	774	521.694	225.9	2	1	40	2522	933.45	4095	0.6	855	2025
1	1	81	37	37	774	521.694	225.9	2	2	40	2487	829.45	4095	0.6	856	2035
1	1	81	38	38	1318	566.976	247.1	2	1	45	2479	871.22	4095	0.35	871	1750
1	1	81	38	38	1318	566.976	247.1	2	2	49	2725	824.07	4095	0.85	874	1766
1	1	81	39	39	764	514.846	207.6	2	1	44	2687	990.1	4095	0.5333	894	379
1	1	81	39	39	764	514.846	207.6	2	2	40	2746	984.55	4095	0.4	904	376
1	1	81	40	40	759	505.223	188.1	1	1	58	3324	862.39	4095	0.4667	985	432
1	1	81	41	41	753	537.671	276.7	2	1	43	2365	831.22	4095	0.6	985	1929
1	1	81	41	41	753	537.671	276.7	2	2	44	2578	919.63	4095	0.6667	996	1935
1	1	81	42	42	791	520.884	217.2	2	1	44	2886	961.44	4095	0.375	1015	1767
1	1	81	42	42	791	520.884	217.2	2	2	44	2744	989.68	4095	0.375	1020	1753
1	1	81	43	43	1448	585.73	309.9	2	1	47	2742	1038.99	4095	0.381	1042	1307
1	1	81	43	43	1448	585.73	309.9	2	2	45	2532	1025.8	4095	0.5714	1064	1302
1	1	81	44	44	825	523.994	227.6	2	1	46	2950	996.53	4095	0.4375	1053	1232
1	1	81	44	44	825	523.994	227.6	2	2	48	3024	886.27	4095	0.8125	1052	1244
1	1	81	45	45	796	537.956	254	1	1	75	3151	919.34	4095	0.5625	1081	1403
1	1	81	46	46	1438	597.103	288.7	2	1	54	3595	646.88	4095	0.4762	1087	1015
1	1	81	46	46	1438	597.103	288.7	2	2	51	3450	791.66	4095	0.9048	1091	1006
1	1	81	47	47	800	522.114	224.4	1	1	72	3511	721.19	4095	0.5625	1092	905
1	1	81	48	48	1329	622.486	336	1	1	100	3645	613.64	4095	0.8	1102	1710
1	1	81	49	49	884	524.351	237.4	2	1	40	2700	1069.21	4095	0.5	1097	1285
1	1	81	49	49	884	524.351	237.4	2	2	42	2679	937.98	4095	0.875	1103	1295
1	1	81	50	50	775	518.196	216.7	2	1	42	2741	1042.32	4095	0.6667	1122	603
1	1	81	50	50	775	518.196	216.7	2	2	42	2741	976.94	4095	0.6667	1129	612
1	1	81	51	51	718	530.852	248.2	2	1	46	2533	1024.44	4095	0.5714	1129	185
1	1	81	51	51	718	530.852	248.2	2	2	41	2677	1028.67	4095	0.5	1131	198
1	1	81	52	52	813	514.903	194.9	2	1	44	2802	983.01	4095	0.6875	1156	1198
1	1	81	52	52	813	514.903	194.9	2	2	42	2860	949.86	4095	0.5625	1157	1208
1	1	81	53	53	826	511.86	202.6	2	1	41	3067	953.05	4095	0.8	1173	369
1	1	81	53	53	826	511.86	202.6	2	2	41	3082	939.16	4095	0.6667	1176	360
1	1	81	54	54	1087	569.676	278	1	1	54	3150	893.22	4095	0.4444	1171	1915
1	1	81	55	55	1383	606.288	307.6	1	1	87	3653	676.54	4095	0.9048	1215	890
1	1	81	56	56	1380	625.075	350.7	2	1	54	3268	831.09	4095	0.7619	1253	1444
1	1	81	56	56	1380	625.075	350.7	2	2	48	3061	865.05	4095	0.619	1263	1438
1	1	81	57	57	832	479.587	138.4	1	1	71	3061	899.28	4095	0.5625	1292	731
1	1	81	58	58	856	528.242	232.5	1	1	57	3267	873.55	4095	0.6875	1291	1231
1	1	81	59	59	817	515.985	212.8	2	1	41	2562	945.42	4095	0.375	1320	1462
1	1	81	59	59	817	515.985	212.8	2	2	43	2417	965.8	4095	0.4375	1326	1480
1	1	81	60	60	800	512.635	199.3	2	1	43	2497	987.42	4095	0.375	1368	698
1	1	81	60	60	800	512.635	199.3	2	2	41	2442	978.8	4095	0.5625	1374	683
1	1	81	61	61	843	501.11	176.2	2	1	44	2820	970.49	4095	0.25	1365	1858
1	1	81	61	61	843	501.11	176.2	2	2	43	2834	858.32	4095	0.875	1370	1869
1	1	81	62	62	796	536.868	268	2	1	45	2963	911.4	4095	0.75	1379	1429
1	1	81	62	62	796	536.868	268	2	2	42	2799	942.45	4095	0.5	1390	1431
1	1	81	63	63	1299	603.35	324.2	1	1	56	2407	696.88	3975	0.6316	1397	263
1	1	81	64	64	1277	602.866	317.4	2	1	39	2798	926.86	4095	0.45	1450	1910
1	1	81	64	64	1277	602.866	317.4	2	2	38	2587	953.02	4095	0.6	1453	1900
1	1	81	65	65	845	520.382	217	2	1	42	2747	983.02	4095	0.375	1456	1506
1	1	81	65	65	845	520.382	217	2	2	42	2625	933.45	4095	0.625	1463	1517
1	1	81	66	66	635	513.37	217.1	2	1	42	2467	1037.48	4095	0.5385	1467	38
1	1	81	66	66	635	513.37	217.1	2	2	39	2446	1010.05	4095	0.6154	1472	25
1	1	81	67	67	1060	575.628	285.5	2	1	43	2415	995.89	4095	0.3889	1556	203
1	1	81	67	67	1060	575.628	285.5	2	2	42	2412	985.59	4095	0.6667	1557	186
1	1	81	68	68	804	516.577	217.7	2	1	43	2897	1066.68	4095	0.4375	1567	946
1	1	81	68	68	804	516.577	217.7	2	2	44	2888	872.52	4095	0.875	1573	955
1	1	81	69	69	1375	607.959	319.2	1	1	84	2905	806.06	4095	1	1633	735
1	1	81	70	70	1376	569.719	262.4	2	1	45	2428	992.88	4095	0.35	1638	842
1	1	81	70	70	1376	569.719	262.4	2	2	41	2499	986.53	4095	0.45	1640	821
1	1	81	71	71	1163	586.831	301.9	2	1	42	2479	989.55	4095	0.4211	1656	1401
1	1	81	71	71	1163	586.831	301.9	2	2	45	2659	928.25	4095	0.5263	1667	1404
1	1	81	72	72	765	541.476	266.4	2	1	43	2470	994.09	4095	0.5333	1679	1846
1	1	81	72	72	765	541.476	266.4	2	2	44	2798	916.57	4095	0.6	1690	1852
1	1	81	73	73	955	541.831	243.5	2	1	43	2541	996.75	4095	0.4706	1687	863
1	1	81	73	73	955	541.831	243.5	2	2	43	2441	913.93	4095	0.7647	1699	871
1	1	81	74	74	783	520.515	229.1	2	1	44	2586	951.14	4095	0.4667	1695	1452
1	1	81	74	74	783	520.515	229.1	2	2	41	2494	939.08	4095	0.6	1708	1451
1	1	81	75	75	1452	546.302	209.3	1	1	108	3250	705.43	4095	0.5238	1813	524
1	1	81	76	76	799	533.846	240.6	2	1	41	2733	1015.14	4095	1	1834	1155
1	1	81	76	76	799	533.846	240.6	2	2	44	2857	916.89	4095	0.4667	1837	1164
1	1	81	77	77	941	541.525	229.3	2	1	43	2264	849.05	4095	0.625	1870	112
1	1	81	77	77	941	541.525	229.3	2	2	41	2284	828.76	4095	0.4375	1884	120
1	1	81	78	78	751	527.462	235.9	1	1	58	3269	858.92	4095	0.5333	1964	756
1	1	81	79	79	682	509.846	224.2	2	1	39	2059	682.67	3483	0.7143	1996	571
1	1	81	79	79	682	509.846	224.2	2	2	34	2153	567.58	3454	0.7857	1996	579
1	1	81	80	80	1190	578.8	289.5	2	1	35	2224	698.52	3814	0.8947	2002	1112
1	1	81	80	80	1190	578.8	289.5	2	2	39	2311	919.24	4095	0.4211	2006	1104
1	1	81	81	81	753	535.433	255.8	1	1	54	3275	831.63	4095	0.5333	2010	1225
2	2	59	1	82	624	468.593	143.8	1	1	60	3169	923.52	4095	0.4286	86	520
2	2	59	2	83	712	494.597	200.4	2	1	39	1849	746.54	3526	0.5	130	974
2	2	59	2	83	712	494.597	200.4	2	2	36	1896	710.96	3452	0.5714	140	974
2	2	59	3	84	710	486.206	174.1	2	1	40	2487	1043.87	4095	0.4667	173	646
2	2	59	3	84	710	486.206	174.1	2	2	35	2359	864.3	4095	0.6	175	655
2	2	59	4	85	1162	577.141	307.3	2	1	55	2954	908.99	4095	0.7059	260	748
2	2	59	4	85	1162	577.141	307.3	2	2	49	2842	942.12	4095	0.5294	276	758
2	2	59	5	86	744	465.297	131.3	2	1	42	2667	910.16	4095	0.2667	339	1502
2	2	59	5	86	744	465.297	131.3	2	2	45	2710	969.28	4095	0.3333	362	1502
2	2	59	6	87	738	514.249	245.4	2	1	42	2582	958.91	4095	0.8	353	1318
2	2	59	6	87	738	514.249	245.4	2	2	41	2725	1028.92	4095	0.4667	364	1314
2	2	59	7	88	771	486.968	179.9	1	1	74	2400	825.97	4095	0.5333	406	1705
2	2	59	8	89	826	476.74	156.6	1	1	59	2996	904.93	4095	0.7333	448	1768
2	2	59	9	90	1499	559.425	241.6	1	1	86	3432	783.1	4095	0.619	474	1523
2	2	59	10	91	1300	574.359	288.1	1	1	86	3540	697.62	4095	0.45	598	1474
2	2	59	11	92	1152	554.833	247.8	1	1	96	3458	771.85	4095	0.5789	593	112
2	2	59	12	93	796	509.447	218.9	2	1	41	2568	1001.69	4095	0.5333	630	1430
2	2	59	12	93	796	509.447	218.9	2	2	42	2242	896.66	4095	0.5333	636	1444
2	2	59	13	94	1102	536.233	231.1	1	1	63	3354	822.55	4095	0.3889	689	1689
2	2	59	14	95	1226	575.288	289.4	1	1	82	3539	770.36	4095	0.5263	680	357
2	2	59	15	96	719	525.053	254.3	1	1	66	3193	882.76	4095	0.6667	680	832
2	2	59	16	97	887	517.355	233	1	1	73	2576	906.02	4095	0.625	676	1021
2	2	59	17	98	1327	533.442	219.1	2	1	52	2806	938.71	4095	0.5	695	1612
2	2	59	17	98	1327	533.442	219.1	2	2	61	3265	835.23	4095	0.4	697	1629
2	2	59	18	99	1422	543.736	229.5	2	1	62	3299	815.2	4095	0.4762	702	998
2	2	59	18	99	1422	543.736	229.5	2	2	62	3319	845.3	4095	0.3333	716	978
2	2	59	19	100	1282	539.566	230.8	1	1	77	3204	882.08	4095	0.4737	702	1560
2	2	59	20	101	923	523.101	219.1	2	1	45	2661	1042.1	4095	0.4118	725	1369
2	2	59	20	101	923	523.101	219.1	2	2	49	2579	858.57	4095	0.8235	738	1367
2	2	59	21	102	828	498.22	211.2	2	1	41	2304	990.35	4095	0.375	749	645
2	2	59	21	102	828	498.22	211.2	2	2	42	2207	889.53	4095	0.5	759	631
2	2	59	22	103	627	478.654	161.5	1	1	54	3122	934.05	4095	0.6429	766	47
2	2	59	23	104	770	477.765	150.5	2	1	45	2862	958.91	4095	0.9333	773	1919
2	2	59	23	104	770	477.765	150.5	2	2	40	2775	900.16	4095	0.3333	775	1928
2	2	59	24	105	828	493.064	208	2	1	45	2749	1065.27	4095	0.5	786	640
2	2	59	24	105	828	493.064	208	2	2	41	2803	989.78	4095	0.5625	796	641
2	2	59	25	106	1321	601.623	324.1	2	1	58	3223	833.17	4095	0.55	845	1449
2	2	59	25	106	1321	601.623	324.1	2	2	50	3143	912.05	4095	0.55	850	1432
2	2	59	26	107	1350	527.996	207.3	3	1	72	2837	948.83	4095	0.5625	862	172
2	2	59	26	107	1350	527.996	207.3	3	2	42	2392	907.88	4095	0.5	870	159
2	2	59	26	107	1350	527.996	207.3	3	3	44	2161	780.24	3930	0.5625	885	164
2	2	59	27	108	784	511.952	225.4	1	1	52	3159	883.3	4095	0.7333	894	1057
2	2	59	28	109	698	480.679	170.4	2	1	38	2257	969.08	4095	0.6667	906	243
2	2	59	28	109	698	480.679	170.4	2	2	39	2393	922.46	4095	0.4	915	239
2	2	59	29	110	747	496.87	198.7	2	1	42	2185	917.57	4095	0.4667	924	1007
2	2	59	29	110	747	496.87	198.7	2	2	42	2427	884.14	4095	0.4	935	994
2	2	59	30	111	1109	553.758	261.2	1	1	58	3307	871.2	4095	0.6111	950	880
2	2	59	31	112	802	493.338	181.9	2	1	43	2141	754.68	3747	0.25	959	1821
2	2	59	31	112	802	493.338	181.9	2	2	43	1998	680.55	3418	0.8125	964	1833
2	2	59	32	113	741	509.642	225.4	2	1	44	2536	1007.36	4095	0.6667	975	1587
2	2	59	32	113	741	509.642	225.4	2	2	45	2860	1000.84	4095	0.6667	980	1597
2	2	59	33	114	773	510.354	220.9	2	1	41	2227	952.76	4095	0.5333	1051	1021
2	2	59	33	114	773	510.354	220.9	2	2	41	2279	991.14	4095	0.4667	1057	1010
2	2	59	34	115	1309	596.549	315.7	1	1	74	3593	665	4095	0.45	1232	882
2	2	59	35	116	767	539.28	286.8	1	1	52	3071	981.53	4095	0.7333	1246	1406
2	2	59	36	117	812	508.418	211.3	2	1	42	2711	998.49	4095	0.4375	1307	1479
2	2	59	36	117	812	508.418	211.3	2	2	43	2851	897.86	4095	0.6875	1313	1488
2	2	59	37	118	670	489.505	191.5	2	1	39	2261	890.51	4019	0.6667	1313	82
2	2	59	37	118	670	489.505	191.5	2	2	39	2216	900.18	4095	0.2667	1313	93
2	2	59	38	119	816	504.439	209.1	2	1	43	2256	841.07	4095	0.4375	1308	1805
2	2	59	38	119	816	504.439	209.1	2	2	38	2379	815.36	4054	0.75	1318	1801
2	2	59	39	120	1885	573.774	265.7	3	1	41	2326	861.53	4095	0.5789	1346	1016
2	2	59	39	120	1885	573.774	265.7	3	2	71	3168	894.92	4095	0.7895	1365	1030
2	2	59	39	120	1885	573.774	265.7	3	3	43	2726	990.84	4095	0.6842	1378	1025
2	2	59	40	121	771	496.703	189.8	2	1	41	1825	685.59	3330	0.6667	1372	268
2	2	59	40	121	771	496.703	189.8	2	2	41	2272	935.99	4095	0.4667	1386	263
2	2	59	41	122	799	504.673	207.6	2	1	45	2874	1026.17	4095	0.4	1379	1230
2	2	59	41	122	799	504.673	207.6	2	2	46	2745	995.15	4095	0.4667	1392	1233
2	2	59	42	123	779	490.676	183.1	1	1	68	3178	882.94	4095	0.7333	1386	1287
2	2	59	43	124	768	500.116	211.7	2	1	45	2935	1018.95	4095	0.6	1401	904
2	2	59	43	124	768	500.116	211.7	2	2	43	2628	976.99	4095	0.4667	1403	919
2	2	59	44	125	755	514.405	240.4	1	1	59	3343	825.45	4095	0.9333	1429	571
2	2	59	45	126	777	502.392	204.9	2	1	43	2679	982.07	4095	0.5333	1457	1734
2	2	59	45	126	777	502.392	204.9	2	2	43	2239	753.63	3998	0.4667	1463	1747
2	2	59	46	127	762	509.312	222.4	2	1	39	2732	1042.97	4095	0.4667	1474	1007
2	2	59	46	127	762	509.312	222.4	2	2	39	2908	1018.88	4095	0.7333	1482	1000
2	2	59	47	128	770	499.519	204.6	2	1	41	2772	1062.01	4095	0.3333	1511	741
2	2	59	47	128	770	499.519	204.6	2	2	42	2760	798.33	4095	0.8667	1520	745
2	2	59	48	129	771	494.629	193.9	1	1	60	3258	843.13	4095	0.6667	1545	1208
2	2	59	49	130	845	513.069	232.9	1	1	54	2994	895.85	4095	0.875	1547	784
2	2	59	50	131	832	506.6	209.9	2	1	43	2391	901.41	4095	0.625	1573	1763
2	2	59	50	131	832	506.6	209.9	2	2	40	2533	874.48	4095	0.4375	1577	1774
2	2	59	51	132	1231	559.469	253.7	2	1	43	2523	921.57	4095	0.8947	1610	259
2	2	59	51	132	1231	559.469	253.7	2	2	49	2880	936.41	4095	0.5263	1621	265
2	2	59	52	133	740	514.632	238.6	2	1	39	2131	946.58	4095	0.4667	1639	394
2	2	59	52	133	740	514.632	238.6	2	2	41	2126	877.56	4095	0.6667	1650	399
2	2	59	53	134	614	475.686	156.5	1	1	51	3008	968.51	4095	0.2857	1681	30
2	2	59	54	135	818	495.69	185.9	2	1	43	1928	801.99	4016	0.3125	1694	1954
2	2	59	54	135	818	495.69	185.9	2	2	39	1985	732.51	3756	0.8125	1703	1966
2	2	59	55	136	762	518.087	243.7	2	1	38	2463	1005.14	4095	0.5333	1777	845
2	2	59	55	136	762	518.087	243.7	2	2	34	2192	839.31	3926	0.4	1784	840
2	2	59	56	137	795	492.372	181.5	2	1	43	2557	952.07	4095	0.5625	1852	1008
2	2	59	56	137	795	492.372	181.5	2	2	43	2484	961.7	4095	0.5	1856	1022
2	2	59	57	138	1353	581.491	278.8	2	1	42	2372	883.73	4095	0.4	1868	1486
2	2	59	57	138	1353	581.491	278.8	2	2	42	2038	780.04	3805	0.45	1887	1495
2	2	59	58	139	776	493.996	192.5	2	1	38	2076	801.33	4042	0.6	1918	1923
2	2	59	58	139	776	493.996	192.5	2	2	35	2050	587.34	3270	0.8667	1921	1931
2	2	59	59	140	756	495.925	190.6	1	1	68	3194	868.16	4095	0.3333	1977	991
3	3	77	1	141	677	473.567	171.9	2	1	46	2634	985.44	4095	0.2857	10	743
3	3	77	1	141	677	473.567	171.9	2	2	47	2821	983.31	4095	0.3571	27	737
3	3	77	2	142	1364	523.147	223.6	3	1	75	3500	752.18	4095	0.5882	31	1361
3	3	77	2	142	1364	523.147	223.6	3	2	45	2408	876.15	4095	0.2941	38	1328
3	3	77	2	142	1364	523.147	223.6	3	3	44	2480	798.42	4095	0.6471	43	1339
3	3	77	3	143	1257	531.087	232.8	2	1	70	3702	600	4095	0.9474	53	1919
3	3	77	3	143	1257	531.087	232.8	2	2	69	3616	642.51	4095	0.3684	59	1908
3	3	77	4	144	722	497.795	214.9	1	1	88	3222	898.92	4095	0.8667	69	935
3	3	77	5	145	706	466.928	163.7	2	1	45	2915	976.72	4095	0.3333	89	1955
3	3	77	5	145	706	466.928	163.7	2	2	47	2972	838.8	4095	0.7333	94	1966
3	3	77	6	146	748	482.703	180.9	2	1	53	3150	887.92	4095	0.3333	163	1206
3	3	77	6	146	748	482.703	180.9	2	2	50	3263	821.17	4095	0.5333	170	1217
3	3	77	7	147	665	435.823	84.6	2	1	48	2915	890.88	4095	0.3571	191	391
3	3	77	7	147	665	435.823	84.6	2	2	52	3093	898.4	4095	0.5	197	375
3	3	77	8	148	678	465.814	156.7	1	1	74	3503	720.99	4095	0.3571	249	249
3	3	77	9	149	765	506.495	227	2	1	53	3199	901.12	4095	0.5333	241	1412
3	3	77	9	149	765	506.495	227	2	2	51	3183	870.52	4095	0.7333	253	1412
3	3	77	10	150	777	478.649	179.1	1	1	72	3219	846.7	4095	0.6	265	753
3	3	77	11	151	598	458.49	146.3	2	1	43	2861	1020.14	4095	0.7692	290	71
3	3	77	11	151	598	458.49	146.3	2	2	41	2926	953.07	4095	0.4615	297	64
3	3	77	12	152	691	478.802	185.7	2	1	44	2630	896.09	4095	0.4286	289	424
3	3	77	12	152	691	478.802	185.7	2	2	46	2855	937.21	4095	0.4286	305	431
3	3	77	13	153	722	496.199	224.1	1	1	71	3453	772.8	4095	0.5333	304	492
3	3	77	14	154	1245	573.721	303.4	2	1	53	3183	918.06	4095	0.5263	366	531
3	3	77	14	154	1245	573.721	303.4	2	2	58	3349	801.06	4095	0.5789	376	547
3	3	77	15	155	750	480.708	194.5	2	1	44	2827	983.38	4095	0.6667	398	178
3	3	77	15	155	750	480.708	194.5	2	2	47	3061	889.87	4095	0.5333	408	185
3	3	77	16	156	803	547.934	320.3	2	1	45	3103	937.43	4095	0.625	411	1098
3	3	77	16	156	803	547.934	320.3	2	2	46	3168	898.58	4095	0.6875	418	1089
3	3	77	17	157	1281	580.315	303.6	3	1	40	2762	989.72	4095	0.6842	482	1280
3	3	77	17	157	1281	580.315	303.6	3	2	47	2942	976.01	4095	0.4737	488	1266
3	3	77	17	157	1281	580.315	303.6	3	3	60	3401	724.22	4095	0.6316	491	1287
3	3	77	18	158	796	509.827	241.8	1	1	78	3533	679.71	4095	0.4375	514	1549
3	3	77	19	159	747	468.594	161	1	1	78	2732	915.77	4095	0.6667	510	1192
3	3	77	20	160	691	471.01	205.4	2	1	43	2510	978.04	4095	0.6154	512	1496
3	3	77	20	160	691	471.01	205.4	2	2	48	2426	868.98	4095	0.7692	517	1509
3	3	77	21	161	1400	541.949	231.6	2	1	70	3725	565.21	4095	0.619	574	632
3	3	77	21	161	1400	541.949	231.6	2	2	74	3680	619.61	4095	0.4286	578	620
3	3	77	22	162	817	488.337	205.2	2	1	51	3121	956.86	4095	0.4375	594	506
3	3	77	22	162	817	488.337	205.2	2	2	52	3043	985.26	4095	0.5625	604	494
3	3	77	23	163	1372	597.14	336.2	2	1	74	3540	710.81	4095	0.8	601	1640
3	3	77	23	163	1372	597.14	336.2	2	2	71	3560	684.63	4095	0.5	615	1632
3	3	77	24	164	1132	533.792	248.8	2	1	49	3197	857.93	4095	0.5556	637	542
3	3	77	24	164	1132	533.792	248.8	2	2	49	3078	994.33	4095	0.5	638	531
3	3	77	25	165	685	494.031	214.1	2	1	46	2818	1038.41	4095	0.4286	673	166
3	3	77	25	165	685	494.031	214.1	2	2	45	2829	1009.01	4095	0.5714	677	150
3	3	77	26	166	894	523.39	256.7	1	1	88	3280	878.06	4095	0.6875	691	1052
3	3	77	27	167	738	487.18	200.2	1	1	86	3307	876.31	4095	0.7333	736	211
3	3	77	28	168	1505	551.181	240.8	1	1	122	3757	557.01	4095	0.5238	769	499
3	3	77	29	169	823	501.134	212.2	1	1	90	3238	832.97	4095	0.875	768	1969
3	3	77	30	170	1262	579.388	313.7	2	1	50	3036	951.3	4095	0.4737	791	1086
3	3	77	30	170	1262	579.388	313.7	2	2	51	3004	983.56	4095	0.6842	808	1078
3	3	77	31	171	1170	548.167	261.3	2	1	55	3184	894.64	4095	0.3684	804	32
3	3	77	31	171	1170	548.167	261.3	2	2	55	3164	890.04	4095	0.5263	816	17
3	3	77	32	172	881	487.934	184.4	2	1	49	3114	920.88	4095	0.6875	848	1242
3	3	77	32	172	881	487.934	184.4	2	2	49	2891	932.31	4095	0.4375	850	1227
3	3	77	33	173	783	490.607	196.6	1	1	88	3369	828.5	4095	0.5333	869	313
3	3	77	34	174	1744	581.838	292.5	2	1	47	3166	907.76	4095	0.4286	969	1506
3	3	77	34	174	1744	581.838	292.5	2	2	136	3765	486.12	4095	1	971	1523
3	3	77	35	175	719	470.342	176.4	1	1	65	3430	733.47	4095	0.5333	987	303
3	3	77	36	176	1423	553.185	256.6	2	1	73	3519	677.73	4095	0.4286	990	254
3	3	77	36	176	1423	553.185	256.6	2	2	68	3428	772.09	4095	0.4286	1005	239
3	3	77	37	177	804	505.561	226.6	2	1	48	2862	951.44	4095	0.6875	1001	1912
3	3	77	37	177	804	505.561	226.6	2	2	48	2852	933.22	4095	0.5625	1013	1911
3	3	77	38	178	744	474.478	175.9	2	1	44	2890	947.72	4095	0.4667	1013	305
3	3	77	38	178	744	474.478	175.9	2	2	48	2763	940.85	4095	0.3333	1016	321
3	3	77	39	179	876	475.616	157.6	2	1	54	2975	942.75	4095	0.375	1044	1002
3	3	77	39	179	876	475.616	157.6	2	2	55	3167	878.22	4095	0.5	1046	1020
3	3	77	40	180	804	515.922	256	2	1	49	3171	980.4	4095	0.75	1101	675
3	3	77	40	180	804	515.922	256	2	2	47	3294	847.04	4095	0.5	1108	683
3	3	77	41	181	804	489.902	197.9	2	1	47	3054	924.99	4095	0.5	1099	1953
3	3	77	41	181	804	489.902	197.9	2	2	48	3146	813.86	4095	0.4375	1110	1958
3	3	77	42	182	809	508.419	235.3	2	1	50	3254	918.91	4095	0.8125	1112	777
3	3	77	42	182	809	508.419	235.3	2	2	50	3235	904.8	4095	0.5	1121	769
3	3	77	43	183	834	473.71	169.9	2	1	52	3187	821.23	4095	0.6875	1114	1716
3	3	77	43	183	834	473.71	169.9	2	2	46	3312	773.78	4095	0.375	1124	1721
3	3	77	44	184	878	473.226	165.2	2	1	51	3343	818	4095	0.6875	1136	956
3	3	77	44	184	878	473.226	165.2	2	2	54	3469	700.31	4095	0.625	1145	946
3	3	77	45	185	761	496.382	211.1	2	1	47	2730	1064.91	4095	0.4667	1137	64
3	3	77	45	185	761	496.382	211.1	2	2	48	2875	978.95	4095	0.6	1150	60
3	3	77	46	186	1548	525.271	197.9	2	1	73	3457	711.02	4095	0.3636	1155	1085
3	3	77	46	186	1548	525.271	197.9	2	2	79	3573	635.1	4095	0.5455	1157	1061
3	3	77	47	187	1473	578.434	297.5	1	1	85	3632	604.89	4095	0.4286	1157	885
3	3	77	48	188	854	497.227	219.1	2	1	42	3358	842.39	4095	0.375	1205	1096
3	3	77	48	188	854	497.227	219.1	2	2	50	3507	784.32	4095	0.8125	1213	1090
3	3	77	49	189	1802	606.377	352	2	1	67	3526	680.05	4095	0.6957	1284	1704
3	3	77	49	189	1802	606.377	352	2	2	115	3597	663.13	4095	0.6087	1300	1699
3	3	77	50	190	793	520.033	258.9	2	1	42	2876	1024.95	4095	0.375	1277	335
3	3	77	50	190	793	520.033	258.9	2	2	38	2891	973.44	4095	0.9375	1285	330
3	3	77	51	191	1127	546.771	282.6	1	1	96	3641	692.05	4095	0.5625	1289	1017
3	3	77	52	192	1475	598.871	327.2	2	1	64	3418	787.59	4095	0.619	1332	597
3	3	77	52	192	1475	598.871	327.2	2	2	61	3419	801.27	4095	0.7619	1346	595
3	3	77	53	193	779	513.77	255.7	1	1	84	3382	838.19	4095	0.5	1371	711
3	3	77	54	194	887	478.88	168.7	2	1	46	2980	891.99	4095	0.75	1411	1798
3	3	77	54	194	887	478.88	168.7	2	2	47	2671	948.36	4095	0.3125	1427	1793
3	3	77	55	195	807	492.036	204.2	2	1	47	2839	979.09	4095	0.4375	1411	408
3	3	77	55	195	807	492.036	204.2	2	2	49	3145	892.81	4095	0.375	1415	422
3	3	77	56	196	952	490.269	221.9	1	1	66	3439	757.71	4095	0.4706	1435	747
3	3	77	57	197	994	524.4	263.6	1	1	79	3071	907.99	4095	0.7059	1424	1249
3	3	77	58	198	1279	548.28	282.4	1	1	58	3313	853.91	4095	0.8947	1458	720
3	3	77	59	199	1587	551.101	266.9	4	1	42	2555	806.73	4095	0.5	1460	1166
3	3	77	59	199	1587	551.101	266.9	4	2	47	3294	845.36	4095	0.8889	1467	1182
3	3	77	59	199	1587	551.101	266.9	4	3	38	2826	864.74	4095	0.5556	1471	1173
3	3	77	59	199	1587	551.101	266.9	4	4	47	3280	788.93	4095	0.5	1470	1198
3	3	77	60	200	831	500.732	209.8	1	1	72	3298	866.29	4095	0.875	1504	799
3	3	77	61	201	794	522.53	261.7	2	1	44	3270	874.74	4095	0.6	1559	1778
3	3	77	61	201	794	522.53	261.7	2	2	42	3273	814.66	4095	0.6667	1564	1787
3	3	77	62	202	733	522.053	276	1	1	62	3211	876.97	4095	0.7333	1568	1964
3	3	77	63	203	783	517.971	252.6	2	1	47	3051	975.88	4095	0.4667	1591	1046
3	3	77	63	203	783	517.971	252.6	2	2	50	3177	858.42	4095	0.6667	1601	1054
3	3	77	64	204	828	505.523	218.6	2	1	45	2584	1039.84	4095	0.4375	1606	454
3	3	77	64	204	828	505.523	218.6	2	2	45	2853	986.96	4095	0.3125	1610	472
3	3	77	65	205	809	519.042	254.7	1	1	74	3455	745.25	4095	0.5	1644	822
3	3	77	66	206	1526	577.092	297	2	1	77	3571	643.76	4095	0.6818	1728	1701
3	3	77	66	206	1526	577.092	297	2	2	62	3395	757.43	4095	0.4545	1736	1684
3	3	77	67	207	1325	599.868	375.1	1	1	123	3586	723.89	4095	0.6	1784	1440
3	3	77	68	208	870	503.245	222.4	1	1	84	3364	787.99	4095	0.625	1795	1691
3	3	77	69	209	845	503.143	244.3	2	1	44	3184	878.93	4095	0.5625	1804	1478
3	3	77	69	209	845	503.143	244.3	2	2	45	3159	847.19	4095	0.8125	1814	1477
3	3	77	70	210	1525	506.222	167.5	2	1	59	3430	754	4095	0.7143	1816	650
3	3	77	70	210	1525	506.222	167.5	2	2	66	3402	713.43	4095	0.381	1829	667
3	3	77	71	211	873	507.828	223.1	2	1	52	2965	976.25	4095	0.375	1859	1096
3	3	77	71	211	873	507.828	223.1	2	2	50	3049	937.51	4095	0.5	1867	1083
3	3	77	72	212	824	530.638	275.2	2	1	47	2940	990.74	4095	0.625	1882	957
3	3	77	72	212	824	530.638	275.2	2	2	46	2977	931.84	4095	0.5625	1887	968
3	3	77	73	213	1475	581.702	294.8	2	1	55	3265	869.52	4095	0.381	1883	1509
3	3	77	73	213	1475	581.702	294.8	2	2	55	3313	748.41	4095	0.5238	1888	1521
3	3	77	74	214	1097	534.667	247	1	1	83	3271	792.61	4095	0.5556	1888	1629
3	3	77	75	215	996	531.664	255.8	2	1	50	3166	864.87	4095	0.7647	1966	1604
3	3	77	75	215	996	531.664	255.8	2	2	44	3222	822.62	4095	0.6471	1975	1603
3	3	77	76	216	813	497.87	211.8	2	1	48	3148	833.28	4095	0.4375	1967	1294
3	3	77	76	216	813	497.87	211.8	2	2	44	3159	918.15	4095	0.375	1968	1284
3	3	77	77	217	816	497.684	209.1	2	1	49	3105	925.41	4095	0.4375	2008	1039
3	3	77	77	217	816	497.684	209.1	2	2	52	3117	848.78	4095	0.4375	2009	1057
4	4	127	1	218	1110	522.698	157.5	1	1	119	3671	621.77	4095	0.6111	25	360
4	4	127	2	219	951	582.719	262.5	2	1	51	2956	936.7	4095	0.7059	68	1522
4	4	127	2	219	951	582.719	262.5	2	2	51	2996	955.81	4095	0.5882	80	1529
4	4	127	3	220	746	522.575	177.1	1	1	88	3224	820.03	4095	0.4667	86	1336
4	4	127	4	221	1026	563.816	228.4	1	1	107	3300	820.08	4095	0.5	117	984
4	4	127	5	222	736	545.004	246.9	2	1	48	3237	912.63	4095	0.5333	118	1117
4	4	127	5	222	736	545.004	246.9	2	2	45	3509	700.54	4095	0.6	118	1126
4	4	127	6	223	1337	617.233	308.1	1	1	147	3716	566.77	4095	0.45	107	1180
4	4	127	7	224	1140	613.771	296.9	2	1	52	3081	921.74	4095	0.6667	119	1406
4	4	127	7	224	1140	613.771	296.9	2	2	49	3051	921.54	4095	0.5556	133	1405
4	4	127	8	225	714	536.319	201.1	2	1	47	2792	954.16	4095	0.2667	163	1895
4	4	127	8	225	714	536.319	201.1	2	2	49	2935	896.87	4095	0.8	172	1907
4	4	127	9	226	1285	546.478	188.5	3	1	47	2847	946.99	4095	0.5	204	278
4	4	127	9	226	1285	546.478	188.5	3	2	47	3077	840.47	4095	0.875	216	282
4	4	127	9	226	1285	546.478	188.5	3	3	76	3532	734.88	4095	0.4375	234	285
4	4	127	10	227	1656	550.849	212	4	1	52	3271	799.04	4095	0.5882	204	1148
4	4	127	10	227	1656	550.849	212	4	2	48	3145	911.35	4095	0.6471	211	1139
4	4	127	10	227	1656	550.849	212	4	3	50	3308	877.38	4095	0.9412	226	1135
4	4	127	10	227	1656	550.849	212	4	4	50	3298	792.55	4095	0.4118	238	1131
4	4	127	11	228	669	535.593	212.8	2	1	51	2972	945.46	4095	0.4286	232	586
4	4	127	11	228	669	535.593	212.8	2	2	48	3049	939.67	4095	0.3571	247	587
4	4	127	12	229	752	528.286	222.8	2	1	49	2978	966.25	4095	0.4	278	495
4	4	127	12	229	752	528.286	222.8	2	2	50	2905	988.27	4095	0.5333	284	478
4	4	127	13	230	616	505.674	144.2	2	1	49	2829	925.95	4095	0.3077	297	225
4	4	127	13	230	616	505.674	144.2	2	2	51	2916	944.19	4095	0.4615	298	208
4	4	127	14	231	681	493.677	115.7	1	1	89	3508	736.4	4095	0.3333	342	599
4	4	127	15	232	1299	630.835	336.9	2	1	81	3596	655.6	4095	0.5	349	1906
4	4	127	15	232	1299	630.835	336.9	2	2	78	3659	554.59	4095	0.65	353	1921
4	4	127	16	233	1091	579.001	255.7	2	1	51	3220	869.75	4095	0.3889	343	998
4	4	127	16	233	1091	579.001	255.7	2	2	52	3279	863.88	4095	0.6111	355	994
4	4	127	17	234	887	590.469	282.6	1	1	82	3585	677.07	4095	0.4375	348	1212
4	4	127	18	235	1484	603.95	279.3	4	1	52	3160	904.04	4095	0.4211	366	1431
4	4	127	18	235	1484	603.95	279.3	4	2	54	3488	772.46	4095	0.6316	376	1443
4	4	127	18	235	1484	603.95	279.3	4	3	45	3387	711.13	4095	0.5789	386	1438
4	4	127	18	235	1484	603.95	279.3	4	4	54	3180	841.26	4095	0.4737	391	1425
4	4	127	19	236	814	534.722	193.5	1	1	62	3197	792.17	4095	0.6875	389	1960
4	4	127	20	237	773	501.909	123.9	1	1	85	3644	671.39	4095	0.4	408	1665
4	4	127	21	238	1109	570.139	253.5	2	1	59	3137	909.08	4095	0.3333	438	438
4	4	127	21	238	1109	570.139	253.5	2	2	63	3472	708.93	4095	0.6667	453	444
4	4	127	22	239	776	511.405	152.4	1	1	91	3432	769.07	4095	0.7333	468	884
4	4	127	23	240	1406	545.888	206.6	2	1	56	2976	934.35	4095	0.4	499	434
4	4	127	23	240	1406	545.888	206.6	2	2	56	3246	878.62	4095	0.55	500	414
4	4	127	24	241	689	533.44	198.2	2	1	47	3199	944.44	4095	0.5714	487	275
4	4	127	24	241	689	533.44	198.2	2	2	45	3290	737.39	4095	0.6429	491	284
4	4	127	25	242	1312	642.056	329.3	2	1	78	3572	671.35	4095	0.45	515	1956
4	4	127	25	242	1312	642.056	329.3	2	2	79	3684	530.21	4095	0.9	529	1955
4	4	127	26	243	775	512.768	179.8	1	1	93	3393	802.75	4095	0.4667	551	422
4	4	127	27	244	784	556.351	247.2	2	1	55	3174	873.05	4095	0.375	537	1494
4	4	127	27	244	784	556.351	247.2	2	2	53	3094	958.14	4095	0.375	544	1480
4	4	127	28	245	1525	595.981	257.2	3	1	52	3199	908.24	4095	0.5	568	1279
4	4	127	28	245	1525	595.981	257.2	3	2	44	3536	642.07	4095	0.8889	574	1289
4	4	127	28	245	1525	595.981	257.2	3	3	92	3615	623.72	4095	0.7778	579	1298
4	4	127	29	246	809	483.154	120.3	2	1	46	3125	917.68	4095	0.2667	591	189
4	4	127	29	246	809	483.154	120.3	2	2	52	3050	947.79	4095	0.6	596	169
4	4	127	30	247	768	532.815	184.4	2	1	51	3301	780.91	4095	0.6667	591	1835
4	4	127	30	247	768	532.815	184.4	2	2	48	3091	919.94	4095	0.5333	596	1824
4	4	127	31	248	752	512.242	177.3	2	1	53	3079	921.59	4095	0.3571	593	210
4	4	127	31	248	752	512.242	177.3	2	2	50	3122	940.42	4095	0.5714	607	221
4	4	127	32	249	729	563.047	267.1	2	1	51	3128	943.92	4095	0.6	600	848
4	4	127	32	249	729	563.047	267.1	2	2	48	3112	911.41	4095	0.4667	608	835
4	4	127	33	250	856	540.738	239.2	1	1	99	3440	745.72	4095	0.8125	611	1126
4	4	127	34	251	669	473.731	98.2	1	1	38	3155	883.58	4095	0.2143	605	279
4	4	127	35	252	737	599.159	342.2	2	1	52	3280	884.6	4095	0.6	619	1451
4	4	127	35	252	737	599.159	342.2	2	2	49	3424	761.83	4095	0.6667	628	1456
4	4	127	36	253	668	552.03	242.5	2	1	55	3189	834.3	4095	0.3571	615	128
4	4	127	36	253	668	552.03	242.5	2	2	50	3092	959.4	4095	0.5	624	120
4	4	127	37	254	789	568.977	267.7	2	1	53	3310	864.75	4095	0.4375	635	776
4	4	127	37	254	789	568.977	267.7	2	2	51	3384	790.36	4095	0.75	645	783
4	4	127	38	255	712	521.362	182.7	2	1	60	3281	867.22	4095	0.6429	688	199
4	4	127	38	255	712	521.362	182.7	2	2	60	3328	826.62	4095	0.5	695	212
4	4	127	39	256	784	571.807	270.3	2	1	51	2996	995.04	4095	0.4667	707	1006
4	4	127	39	256	784	571.807	270.3	2	2	49	3005	998.81	4095	0.6	722	1012
4	4	127	40	257	797	532.699	199.4	1	1	71	3438	767.94	4095	0.4	741	367
4	4	127	41	258	723	550.029	222.9	2	1	54	3230	849.73	4095	0.2667	733	481
4	4	127	41	258	723	550.029	222.9	2	2	54	3250	829.77	4095	0.6667	744	471
4	4	127	42	259	801	559.914	245.3	1	1	65	3337	829.71	4095	0.5625	756	864
4	4	127	43	260	1144	614.925	304	2	1	57	3273	861.73	4095	0.5263	779	1658
4	4	127	43	260	1144	614.925	304	2	2	53	3147	854.2	4095	0.4737	797	1665
4	4	127	44	261	770	539.879	209.9	2	1	47	2904	1014.81	4095	0.4667	791	97
4	4	127	44	261	770	539.879	209.9	2	2	50	3043	916.09	4095	0.4	793	110
4	4	127	45	262	1312	579.142	227.8	2	1	66	3466	738.92	4095	0.6	822	192
4	4	127	45	262	1312	579.142	227.8	2	2	79	3611	631.35	4095	0.65	830	205
4	4	127	46	263	1386	587.882	244.4	2	1	62	3389	775.98	4095	0.4286	824	868
4	4	127	46	263	1386	587.882	244.4	2	2	64	3443	757.51	4095	0.619	829	886
4	4	127	47	264	764	559.954	250.5	2	1	49	3161	977.77	4095	0.4667	827	463
4	4	127	47	264	764	559.954	250.5	2	2	44	3251	856.09	4095	0.7333	837	465
4	4	127	48	265	814	558.915	247	1	1	92	3267	833.7	4095	0.9333	842	1928
4	4	127	49	266	1419	540.611	185.7	3	1	71	3423	815.21	4095	0.3125	834	57
4	4	127	49	266	1419	540.611	185.7	3	2	45	2995	899.26	4095	1	851	44
4	4	127	49	266	1419	540.611	185.7	3	3	44	3032	921.72	4095	0.625	861	38
4	4	127	50	267	1009	596.644	291.8	1	1	92	3435	803.35	4095	0.5294	858	773
4	4	127	51	268	821	524.205	194.5	2	1	58	3260	842.78	4095	0.4375	844	1543
4	4	127	51	268	821	524.205	194.5	2	2	54	3278	799.19	4095	0.5	859	1533
4	4	127	52	269	1660	564.565	221.3	2	1	74	3679	592.76	4095	0.4545	851	1159
4	4	127	52	269	1660	564.565	221.3	2	2	72	3679	582.25	4095	0.5	862	1149
4	4	127	53	270	1215	603.164	290.9	2	1	53	3166	855.37	4095	0.6842	875	1388
4	4	127	53	270	1215	603.164	290.9	2	2	51	3053	954.79	4095	0.4211	879	1373
4	4	127	54	271	904	536.748	219.3	2	1	44	3273	846.74	4095	0.8125	897	1526
4	4	127	54	271	904	536.748	219.3	2	2	39	3167	911.54	4095	0.5625	903	1517
4	4	127	55	272	1182	647.625	360.6	3	1	44	3053	992.24	4095	0.6111	891	328
4	4	127	55	272	1182	647.625	360.6	3	2	57	3542	745.48	4095	0.8333	900	335
4	4	127	55	272	1182	647.625	360.6	3	3	43	3029	850.29	4095	0.3889	909	342
4	4	127	56	273	1820	659.72	327.1	4	1	51	3322	856.78	4095	0.381	897	519
4	4	127	56	273	1820	659.72	327.1	4	2	43	3085	876.31	4095	0.4762	906	546
4	4	127	56	273	1820	659.72	327.1	4	3	53	3169	895.84	4095	0.381	910	510
4	4	127	56	273	1820	659.72	327.1	4	4	105	3633	644.18	4095	0.6667	916	535
4	4	127	57	274	1638	563.78	205.4	1	1	121	3749	525.85	4095	0.4091	908	1438
4	4	127	58	275	1558	559.683	190.2	3	1	49	3104	860.14	4095	0.3889	929	1947
4	4	127	58	275	1558	559.683	190.2	3	2	83	3214	739.71	4095	0.7778	932	1965
4	4	127	58	275	1558	559.683	190.2	3	3	52	2578	563.3	3827	0.3889	950	1965
4	4	127	59	276	907	504.122	141.1	2	1	55	3261	841.51	4095	0.5	932	1486
4	4	127	59	276	907	504.122	141.1	2	2	55	3360	791.57	4095	0.5	937	1502
4	4	127	60	277	845	540.437	218.3	1	1	69	3413	778.65	4095	0.5625	942	1774
4	4	127	61	278	1179	597.125	270.3	2	1	60	3366	822.51	4095	0.5263	956	947
4	4	127	61	278	1179	597.125	270.3	2	2	54	3208	841.19	4095	0.3684	972	952
4	4	127	62	279	912	563.866	277.6	2	1	44	3352	818.11	4095	0.5294	964	1354
4	4	127	62	279	912	563.866	277.6	2	2	43	3269	866.57	4095	0.8235	966	1345
4	4	127	63	280	801	570.894	268	1	1	110	3523	696.51	4095	0.625	977	1871
4	4	127	64	281	1411	648.508	339.9	1	1	131	3752	509.81	4095	0.4762	991	1202
4	4	127	65	282	989	580.527	284.4	1	1	83	3590	655.43	4095	0.7059	990	1739
4	4	127	66	283	1544	649.816	338.1	4	1	44	3094	986.41	4095	0.6	1020	1555
4	4	127	66	283	1544	649.816	338.1	4	2	47	3194	799.22	4095	0.65	1022	1566
4	4	127	66	283	1544	649.816	338.1	4	3	45	3217	791.67	4095	0.85	1031	1553
4	4	127	66	283	1544	649.816	338.1	4	4	44	3095	915.79	4095	0.4	1036	1542
4	4	127	67	284	895	537.455	223.8	1	1	74	3375	800.87	4095	0.6875	1024	1768
4	4	127	68	285	759	569.601	278.9	1	1	106	3661	650.38	4095	0.5333	1025	872
4	4	127	69	286	852	575.935	310.1	2	1	50	3194	957.69	4095	0.6875	1069	1339
4	4	127	69	286	852	575.935	310.1	2	2	47	3307	771.9	4095	0.6875	1079	1344
4	4	127	70	287	793	575.426	282.7	2	1	50	3140	983.85	4095	0.5625	1076	901
4	4	127	70	287	793	575.426	282.7	2	2	45	3377	779.49	4095	0.5	1086	905
4	4	127	71	288	1124	602.364	276.2	2	1	43	3209	903.09	4095	0.3333	1088	1815
4	4	127	71	288	1124	602.364	276.2	2	2	46	3342	822	4095	0.5	1096	1809
4	4	127	72	289	830	561.366	270.8	1	1	80	3551	684.16	4095	0.5	1123	1052
4	4	127	73	290	843	556.705	243.9	2	1	51	3278	848.69	4095	0.4375	1113	1536
4	4	127	73	290	843	556.705	243.9	2	2	55	3337	767.55	4095	0.625	1127	1538
4	4	127	74	291	786	552.433	246.7	1	1	93	3543	762.94	4095	0.6	1122	675
4	4	127	75	292	1554	561.78	193.5	2	1	78	3680	580.82	4095	0.4545	1154	1256
4	4	127	75	292	1554	561.78	193.5	2	2	87	3731	466.78	4095	0.6364	1156	1276
4	4	127	76	293	1409	633.105	306.9	2	1	76	3715	530.9	4095	0.4286	1161	879
4	4	127	76	293	1409	633.105	306.9	2	2	82	3688	584.81	4095	0.9048	1163	867
4	4	127	77	294	1062	579.562	279.2	2	1	44	3121	1013.64	4095	0.4444	1155	1048
4	4	127	77	294	1062	579.562	279.2	2	2	43	3277	805.88	4095	0.3889	1164	1043
4	4	127	78	295	2089	601.048	287	3	1	63	3281	832.82	4095	0.45	1192	222
4	4	127	78	295	2089	601.048	287	3	2	44	3175	909.64	4095	0.75	1209	204
4	4	127	78	295	2089	601.048	287	3	3	40	2885	922.03	4095	0.6	1216	197
4	4	127	79	296	802	556.192	245.5	1	1	85	3628	599.9	4095	0.6875	1206	1895
4	4	127	80	297	804	554.852	227.4	1	1	84	3436	782.74	4095	0.9333	1204	1189
4	4	127	81	298	1450	613.041	274.6	2	1	89	3644	563.78	4095	0.5238	1238	1457
4	4	127	81	298	1450	613.041	274.6	2	2	85	3579	636.92	4095	0.4286	1247	1437
4	4	127	82	299	806	562.933	274.1	2	1	46	3126	942.38	4095	0.5	1232	1703
4	4	127	82	299	806	562.933	274.1	2	2	45	3299	834.5	4095	0.5625	1243	1699
4	4	127	83	300	793	558.934	240.1	1	1	80	3517	759.7	4095	0.5625	1253	831
4	4	127	84	301	843	555.724	257.1	2	1	55	3190	920.61	4095	0.5	1261	1258
4	4	127	84	301	843	555.724	257.1	2	2	47	3174	869.51	4095	0.5	1273	1266
4	4	127	85	302	904	561.691	258.5	2	1	52	3093	927.03	4095	0.6471	1287	1303
4	4	127	85	302	904	561.691	258.5	2	2	49	3005	958.89	4095	0.5294	1300	1304
4	4	127	86	303	904	540.962	231	1	1	95	3554	715.92	4095	0.5	1291	1736
4	4	127	87	304	837	562.093	253.6	2	1	45	2886	982.65	4095	0.625	1301	1822
4	4	127	87	304	837	562.093	253.6	2	2	45	2983	900.13	4095	0.5625	1310	1829
4	4	127	88	305	770	556.1	239.9	1	1	76	3514	697	4095	0.4	1304	576
4	4	127	89	306	885	492.014	144.9	2	1	50	3084	876.52	4095	0.25	1330	1719
4	4	127	89	306	885	492.014	144.9	2	2	48	2991	916.92	4095	0.375	1347	1731
4	4	127	90	307	818	547.081	229.5	2	1	53	3060	917.65	4095	0.4375	1337	1551
4	4	127	90	307	818	547.081	229.5	2	2	50	3082	904.51	4095	0.375	1339	1571
4	4	127	91	308	1002	578.734	277	2	1	47	3274	833.14	4095	0.7059	1387	1640
4	4	127	91	308	1002	578.734	277	2	2	52	3234	811.89	4095	0.5294	1400	1645
4	4	127	92	309	821	523.224	160	2	1	51	3221	862.94	4095	0.4375	1389	1306
4	4	127	92	309	821	523.224	160	2	2	55	3221	825.55	4095	0.25	1405	1317
4	4	127	93	310	957	520.443	154.4	2	1	45	2911	926.03	4095	0.5294	1430	484
4	4	127	93	310	957	520.443	154.4	2	2	49	3009	908.79	4095	0.3529	1444	496
4	4	127	94	311	1368	637.471	330.1	3	1	48	2924	849.49	4095	0.4211	1452	1640
4	4	127	94	311	1368	637.471	330.1	3	2	53	3446	692.68	4095	0.5789	1465	1653
4	4	127	94	311	1368	637.471	330.1	3	3	52	3256	788.01	4095	0.8947	1467	1642
4	4	127	95	312	1209	634.701	321.8	2	1	52	3225	891.34	4095	0.5263	1495	564
4	4	127	95	312	1209	634.701	321.8	2	2	75	3562	688.42	4095	0.4737	1509	572
4	4	127	96	313	909	543.275	192.5	2	1	50	2967	889.77	4095	0.7647	1499	65
4	4	127	96	313	909	543.275	192.5	2	2	49	3153	865.28	4095	0.2941	1509	73
4	4	127	97	314	1123	515.882	165.9	3	1	50	3184	885.06	4095	0.375	1496	172
4	4	127	97	314	1123	515.882	165.9	3	2	50	3140	853.58	4095	0.4375	1509	185
4	4	127	97	314	1123	515.882	165.9	3	3	68	2213	756.07	4095	0.5625	1518	170
4	4	127	98	315	1235	633.958	356.7	2	1	73	3747	560.55	4095	0.7222	1514	980
4	4	127	98	315	1235	633.958	356.7	2	2	73	3580	701.99	4095	0.8889	1519	969
4	4	127	99	316	1391	628.062	300.6	3	1	47	3166	880.97	4095	0.5789	1527	1591
4	4	127	99	316	1391	628.062	300.6	3	2	79	3627	639.9	4095	0.7895	1528	1575
4	4	127	99	316	1391	628.062	300.6	3	3	44	3268	775.3	4095	0.6842	1538	1580
4	4	127	100	317	814	572.636	285.1	2	1	49	3413	809.43	4095	0.4	1528	376
4	4	127	100	317	814	572.636	285.1	2	2	50	3365	875.31	4095	0.8	1532	368
4	4	127	101	318	1399	617.466	287.9	1	1	147	3791	482.37	4095	0.45	1539	1683
4	4	127	102	319	1377	608.338	276	2	1	41	3224	924.55	4095	0.55	1583	1194
4	4	127	102	319	1377	608.338	276	2	2	43	3497	664.17	4095	0.85	1590	1200
4	4	127	103	320	1455	545.302	186.5	2	1	70	3462	710.3	4095	0.2857	1605	194
4	4	127	103	320	1455	545.302	186.5	2	2	69	3583	614.82	4095	0.9524	1620	202
4	4	127	104	321	1220	574.404	227.4	2	1	57	3206	912.62	4095	0.2632	1612	376
4	4	127	104	321	1220	574.404	227.4	2	2	56	3171	868.24	4095	0.4737	1631	362
4	4	127	105	322	1174	632.482	343	2	1	46	3103	962.16	4095	0.4737	1617	276
4	4	127	105	322	1174	632.482	343	2	2	45	3301	769.85	4095	0.7368	1618	286
4	4	127	106	323	779	546.973	217.5	2	1	51	3040	969.63	4095	0.4	1613	866
4	4	127	106	323	779	546.973	217.5	2	2	48	3050	935.46	4095	0.4667	1628	861
4	4	127	107	324	1423	619.648	297.3	2	1	72	3508	718.39	4095	0.4	1615	592
4	4	127	107	324	1423	619.648	297.3	2	2	77	3548	628.28	4095	0.55	1634	605
4	4	127	108	325	787	548.006	222	2	1	45	2937	965.7	4095	0.2667	1651	493
4	4	127	108	325	787	548.006	222	2	2	46	2942	942.53	4095	0.4	1653	479
4	4	127	109	326	1463	530.548	162.9	2	1	66	3516	681.18	4095	0.381	1680	618
4	4	127	109	326	1463	530.548	162.9	2	2	71	3506	674.82	4095	0.2857	1682	639
4	4	127	110	327	833	542.347	225.1	1	1	87	3193	820.96	4095	0.9375	1668	222
4	4	127	111	328	732	557.281	256.3	1	1	68	3500	699.44	4095	0.5333	1710	389
4	4	127	112	329	1023	567.379	236.3	1	1	93	3512	732.93	4095	0.6471	1718	1501
4	4	127	113	330	766	568.727	272.9	2	1	48	3219	931.45	4095	0.7333	1739	1229
4	4	127	113	330	766	568.727	272.9	2	2	48	3359	824.7	4095	0.4667	1749	1226
4	4	127	114	331	1182	581.304	257.2	1	1	83	3531	740.54	4095	0.6316	1776	1510
4	4	127	115	332	1139	575.78	234.6	2	1	50	2963	974.29	4095	0.4211	1783	898
4	4	127	115	332	1139	575.78	234.6	2	2	47	2927	957.47	4095	0.4211	1796	915
4	4	127	116	333	795	563.732	251.8	2	1	44	2845	946.2	4095	0.4	1777	1403
4	4	127	116	333	795	563.732	251.8	2	2	49	2779	1002.2	4095	0.4	1791	1390
4	4	127	117	334	624	481.569	93.6	2	1	23	3172	842.06	4095	0.2143	1812	66
4	4	127	117	334	624	481.569	93.6	2	2	19	2413	854.22	4095	0.1429	1816	81
4	4	127	118	335	1322	639.084	322.2	1	1	103	3588	758.76	4095	0.5	1857	1445
4	4	127	119	336	1313	645.679	339.3	2	1	49	3133	873.96	4095	0.6	1885	1339
4	4	127	119	336	1313	645.679	339.3	2	2	51	3170	871.01	4095	0.55	1894	1354
4	4	127	120	337	853	493.049	118.4	2	1	50	3182	875.45	4095	0.5	1909	784
4	4	127	120	337	853	493.049	118.4	2	2	48	3333	743.84	4095	0.3125	1921	789
4	4	127	121	338	796	557.557	238.5	1	1	84	3160	839.09	4095	0.6875	1911	1044
4	4	127	122	339	812	523.52	163.5	1	1	83	3241	820.12	4095	0.375	1914	703
4	4	127	123	340	1474	568.353	201.6	1	1	142	3775	505.39	4095	0.381	1940	877
4	4	127	124	341	757	501.79	173.7	2	1	44	2933	1005.85	4095	0.3333	1933	126
4	4	127	124	341	757	501.79	173.7	2	2	50	2895	924.03	4095	0.4	1946	128
4	4	127	125	342	671	523.526	178.1	1	1	64	3521	709.36	4095	0.2857	1952	274
4	4	127	126	343	1165	543.572	207.7	2	1	52	3010	956.08	4095	0.3333	1948	391
4	4	127	126	343	1165	543.572	207.7	2	2	48	2956	935.25	4095	0.3889	1970	389
4	4	127	127	344	1332	525.549	161.2	2	1	58	3308	813.17	4095	0.6316	1974	359
4	4	127	127	344	1332	525.549	161.2	2	2	55	3343	776.26	4095	0.4737	1983	345

## Sheet: MY1_Rep2
DatasetName	ImageIndex	TotalCellCount	CellIndex	GlobalCellIndex	NuclearSize	AvgNuclearIntensity	std_NuclearIntensity	Cy5_NumSpotsPerCell	Cy5_SpotIndex	Cy5_SpotSize	Cy5_MeanSpotIntensity	Cy5_std_SpotIntensity	Cy5_MaxSpotIntensity	Cy5_SpotRRD	Cy5_Spot_centroidX	Cy5_Spot_centroidY
MY1_20171011_oligo_Nuc_rDNA_001	1	17	3	3	688	1170	472.9	2	1	40	1366	587.49	2642	0.3077	306	879
MY1_20171011_oligo_Nuc_rDNA_001	1	17	3	3	688	1170	472.9	2	2	41	1445	652.85	2843	0.6923	315	891
MY1_20171011_oligo_Nuc_rDNA_001	1	17	4	4	657	1250	505	2	1	40	1575	828.09	3776	0.7143	399	821
MY1_20171011_oligo_Nuc_rDNA_001	1	17	4	4	657	1250	505	2	2	38	1580	804.07	3564	0.3571	406	810
MY1_20171011_oligo_Nuc_rDNA_001	1	17	5	5	713	1220	468.3	1	1	50	1446	504.44	2561	0.5714	597	339
MY1_20171011_oligo_Nuc_rDNA_001	1	17	7	7	653	1220	468.1	2	1	39	1458	708.58	3019	0.5385	824	162
MY1_20171011_oligo_Nuc_rDNA_001	1	17	7	7	653	1220	468.1	2	2	39	1525	789.9	3350	0.2308	835	169
MY1_20171011_oligo_Nuc_rDNA_001	1	17	8	8	663	1190	459.7	2	1	39	1449	689.67	2837	0.3571	1057	370
MY1_20171011_oligo_Nuc_rDNA_001	1	17	8	8	663	1190	459.7	2	2	38	1584	832.89	3700	0.5	1073	376
MY1_20171011_oligo_Nuc_rDNA_001	1	17	10	10	635	1180	403	2	1	35	1506	759.9	3325	0.2143	1114	137
MY1_20171011_oligo_Nuc_rDNA_001	1	17	10	10	635	1180	403	2	2	37	1437	786.79	3385	0.4286	1126	122
MY1_20171011_oligo_Nuc_rDNA_001	1	17	11	11	759	1240	560.6	2	1	40	1689	891.63	3725	0.8	1175	1250
MY1_20171011_oligo_Nuc_rDNA_001	1	17	11	11	759	1240	560.6	2	2	39	1807	945.76	3930	0.4667	1187	1255
MY1_20171011_oligo_Nuc_rDNA_001	1	17	12	12	773	1180	381.5	2	1	32	1586	647.07	2928	0.2	1315	976
MY1_20171011_oligo_Nuc_rDNA_001	1	17	12	12	773	1180	381.5	2	2	32	1275	559.96	2569	0.7333	1319	968
MY1_20171011_oligo_Nuc_rDNA_001	1	17	13	13	617	1200	457.5	1	1	44	2470	1066.21	4095	0.2308	1413	1983
MY1_20171011_oligo_Nuc_rDNA_001	1	17	14	14	631	1260	546.4	2	1	33	1485	630.27	2834	0.7692	1472	264
MY1_20171011_oligo_Nuc_rDNA_001	1	17	14	14	631	1260	546.4	2	2	33	1538	733.25	3041	0.7692	1478	259
MY1_20171011_oligo_Nuc_rDNA_001	1	17	16	16	683	1340	647.2	2	1	35	1675	628.95	2921	0.5	1816	1649
MY1_20171011_oligo_Nuc_rDNA_001	1	17	16	16	683	1340	647.2	2	2	39	2005	793.07	3775	0.8571	1825	1649
MY1_20171011_oligo_Nuc_rDNA_001	1	17	17	17	645	1240	523.8	2	1	37	1430	621.23	2768	0.8462	1827	1335
MY1_20171011_oligo_Nuc_rDNA_001	1	17	17	17	645	1240	523.8	2	2	36	1744	741.21	3245	0.3846	1829	1344
MY1_20171011_oligo_Nuc_rDNA_002	2	12	1	18	532	1340	604.3	2	1	37	1009	532.55	2209	0.5833	169	572
MY1_20171011_oligo_Nuc_rDNA_002	2	12	1	18	532	1340	604.3	2	2	32	935	421.22	1950	0.3333	169	584
MY1_20171011_oligo_Nuc_rDNA_002	2	12	2	19	667	1300	530.3	2	1	38	1491	677.39	2985	0.5714	277	1157
MY1_20171011_oligo_Nuc_rDNA_002	2	12	2	19	667	1300	530.3	2	2	37	1219	475.06	2211	0.7143	284	1148
MY1_20171011_oligo_Nuc_rDNA_002	2	12	3	20	683	1340	600	2	1	40	1441	743.47	3391	0.4286	589	729
MY1_20171011_oligo_Nuc_rDNA_002	2	12	3	20	683	1340	600	2	2	38	1468	804.41	3404	0.3571	603	729
MY1_20171011_oligo_Nuc_rDNA_002	2	12	4	21	643	1410	746	2	1	34	1619	851.6	3484	0.4286	770	1694
MY1_20171011_oligo_Nuc_rDNA_002	2	12	4	21	643	1410	746	2	2	37	1617	701.64	3119	0.7857	772	1703
MY1_20171011_oligo_Nuc_rDNA_002	2	12	5	22	645	1370	544.3	1	1	42	2091	903.45	4011	0.7692	946	242
MY1_20171011_oligo_Nuc_rDNA_002	2	12	6	23	651	1420	699.2	1	1	50	1994	870.75	4095	0.5	1052	725
MY1_20171011_oligo_Nuc_rDNA_002	2	12	7	24	642	1380	625.1	2	1	41	1604	883.21	3675	0.5714	1350	1067
MY1_20171011_oligo_Nuc_rDNA_002	2	12	7	24	642	1380	625.1	2	2	39	1682	926.32	3887	0.5	1361	1075
MY1_20171011_oligo_Nuc_rDNA_002	2	12	8	25	722	1360	593.6	2	1	39	1693	942.63	3910	0.4	1439	1159
MY1_20171011_oligo_Nuc_rDNA_002	2	12	8	25	722	1360	593.6	2	2	32	1711	737.24	3490	0.9333	1449	1156
MY1_20171011_oligo_Nuc_rDNA_002	2	12	9	26	828	1320	693.2	2	1	37	1169	453.12	2161	0.4667	1496	1808
MY1_20171011_oligo_Nuc_rDNA_002	2	12	9	26	828	1320	693.2	2	2	39	1231	467.52	2197	0.7333	1506	1804
MY1_20171011_oligo_Nuc_rDNA_002	2	12	10	27	745	1290	623.5	2	1	35	1612	742.24	3367	0.4	1562	1768
MY1_20171011_oligo_Nuc_rDNA_002	2	12	10	27	745	1290	623.5	2	2	35	1762	661.69	3165	0.8667	1570	1766
MY1_20171011_oligo_Nuc_rDNA_002	2	12	12	29	716	1280	600.2	1	1	62	1409	440.39	2401	0.5714	1896	493
MY1_20171011_oligo_Nuc_rDNA_003	3	22	3	32	507	1130	372.6	2	1	9	1062	282.32	1531	0.0833	668	1063
MY1_20171011_oligo_Nuc_rDNA_003	3	22	3	32	507	1130	372.6	2	2	42	1612	805.74	3436	0.8333	676	1073
MY1_20171011_oligo_Nuc_rDNA_003	3	22	4	33	640	1360	520.7	2	1	37	1508	783.85	3267	0.4286	684	968
MY1_20171011_oligo_Nuc_rDNA_003	3	22	4	33	640	1360	520.7	2	2	34	1530	692.17	3120	0.7857	688	976
MY1_20171011_oligo_Nuc_rDNA_003	3	22	5	34	505	1390	585.2	2	1	38	1368	751	3277	0.4167	739	79
MY1_20171011_oligo_Nuc_rDNA_003	3	22	5	34	505	1390	585.2	2	2	34	1464	634.01	2824	0.75	740	89
MY1_20171011_oligo_Nuc_rDNA_003	3	22	6	35	467	1380	553.7	1	1	68	1600	660.34	3059	0.5455	795	2021
MY1_20171011_oligo_Nuc_rDNA_003	3	22	7	36	843	1330	699.7	3	1	38	1393	297.39	2016	0.125	801	778
MY1_20171011_oligo_Nuc_rDNA_003	3	22	7	36	843	1330	699.7	3	2	62	885	231.5	1457	0.5	823	787
MY1_20171011_oligo_Nuc_rDNA_003	3	22	7	36	843	1330	699.7	3	3	13	404	47.45	447	0.125	827	777
MY1_20171011_oligo_Nuc_rDNA_003	3	22	9	38	684	1380	561.4	2	1	36	1356	651.68	2675	0.8462	1109	1132
MY1_20171011_oligo_Nuc_rDNA_003	3	22	9	38	684	1380	561.4	2	2	31	1284	394.22	2170	0.6154	1115	1136
MY1_20171011_oligo_Nuc_rDNA_003	3	22	10	39	668	1420	744.6	1	1	52	1504	515.43	2552	0.7143	1176	1715
MY1_20171011_oligo_Nuc_rDNA_003	3	22	12	41	594	1470	710.4	2	1	37	1611	852.48	3510	0.4615	1353	1567
MY1_20171011_oligo_Nuc_rDNA_003	3	22	12	41	594	1470	710.4	2	2	35	1573	727.79	3202	0.8462	1356	1576
MY1_20171011_oligo_Nuc_rDNA_003	3	22	13	42	566	1350	481.8	2	1	36	1786	840.88	3658	0.6154	1371	1490
MY1_20171011_oligo_Nuc_rDNA_003	3	22	13	42	566	1350	481.8	2	2	34	1321	394.74	2196	0.7692	1379	1491
MY1_20171011_oligo_Nuc_rDNA_003	3	22	14	43	609	1450	739.9	2	1	35	1567	970.73	3649	0.4615	1459	1132
MY1_20171011_oligo_Nuc_rDNA_003	3	22	14	43	609	1450	739.9	2	2	36	1908	906.8	3883	0.4615	1466	1138
MY1_20171011_oligo_Nuc_rDNA_003	3	22	15	44	676	1350	614.4	2	1	36	1110	444.46	1985	0.3846	1464	193
MY1_20171011_oligo_Nuc_rDNA_003	3	22	15	44	676	1350	614.4	2	2	38	1241	526.15	2453	0.6923	1475	189
MY1_20171011_oligo_Nuc_rDNA_003	3	22	16	45	653	1410	666.5	2	1	39	1655	966.98	3858	0.2857	1492	954
MY1_20171011_oligo_Nuc_rDNA_003	3	22	16	45	653	1410	666.5	2	2	38	1634	887.44	3609	0.9286	1503	950
MY1_20171011_oligo_Nuc_rDNA_003	3	22	17	46	610	1400	560.2	1	1	46	2635	1162.3	4095	0.6154	1506	669
MY1_20171011_oligo_Nuc_rDNA_003	3	22	18	47	677	1400	648.8	1	1	70	1820	864.87	3729	0.5714	1520	826
MY1_20171011_oligo_Nuc_rDNA_003	3	22	19	48	647	1250	538	2	1	34	1488	753.27	3127	0.3077	1530	153
MY1_20171011_oligo_Nuc_rDNA_003	3	22	19	48	647	1250	538	2	2	36	1632	680.25	3355	0.8462	1538	151
MY1_20171011_oligo_Nuc_rDNA_003	3	22	20	49	880	1460	745.8	1	1	65	1778	739.54	3373	0.6875	1541	1770
MY1_20171011_oligo_Nuc_rDNA_003	3	22	21	50	640	1360	529.3	2	1	37	1377	512.97	2444	0.7692	1693	1659
MY1_20171011_oligo_Nuc_rDNA_003	3	22	21	50	640	1360	529.3	2	2	38	1484	713.64	3140	0.5385	1694	1648
MY1_20171011_oligo_Nuc_rDNA_003	3	22	22	51	548	1470	668.4	2	1	41	1493	783.02	3407	0.3077	1950	934
MY1_20171011_oligo_Nuc_rDNA_003	3	22	22	51	548	1470	668.4	2	2	39	1530	763.62	3543	0.4615	1965	939
MY1_20171011_oligo_Nuc_rDNA_004	4	17	2	53	593	1200	595.6	1	1	40	1547	680.16	3019	0.4615	309	845
MY1_20171011_oligo_Nuc_rDNA_004	4	17	3	54	734	1050	393.6	1	1	40	1832	806.76	3696	0.4286	582	1337
MY1_20171011_oligo_Nuc_rDNA_004	4	17	5	56	642	1070	387.1	1	1	42	1491	531.14	2556	0.3571	626	2024
MY1_20171011_oligo_Nuc_rDNA_004	4	17	6	57	701	1170	515.7	1	1	42	2158	1038.69	4095	0.3571	732	805
MY1_20171011_oligo_Nuc_rDNA_004	4	17	7	58	690	1190	572.8	1	1	46	1832	749.14	3181	0.4286	857	1299
MY1_20171011_oligo_Nuc_rDNA_004	4	17	8	59	860	1110	517.4	1	1	42	1981	885.49	3724	0.625	1359	1090
MY1_20171011_oligo_Nuc_rDNA_004	4	17	9	60	689	1080	395.3	2	1	40	1247	516.31	2505	0.3571	1385	1924
MY1_20171011_oligo_Nuc_rDNA_004	4	17	9	60	689	1080	395.3	2	2	37	1095	410.47	1929	0.6429	1398	1930
MY1_20171011_oligo_Nuc_rDNA_004	4	17	12	63	638	1110	463.4	2	1	35	1143	509.83	2233	0.2143	1498	228
MY1_20171011_oligo_Nuc_rDNA_004	4	17	12	63	638	1110	463.4	2	2	36	1130	460.63	2240	0.6429	1507	234
MY1_20171011_oligo_Nuc_rDNA_004	4	17	13	64	678	1120	506.4	2	1	29	953	349.75	1634	0.4286	1527	277
MY1_20171011_oligo_Nuc_rDNA_004	4	17	13	64	678	1120	506.4	2	2	35	1078	430.79	1939	0.7143	1535	276
MY1_20171011_oligo_Nuc_rDNA_004	4	17	14	65	713	1160	549	2	1	29	992	372.26	1730	0.3571	1617	1766
MY1_20171011_oligo_Nuc_rDNA_004	4	17	14	65	713	1160	549	2	2	32	1106	368.03	1879	0.6429	1622	1772
MY1_20171011_oligo_Nuc_rDNA_004	4	17	16	67	409	880	280.5	1	1	39	1413	617.08	2760	0.7778	1747	1191
MY1_20171011_oligo_Nuc_rDNA_004	4	17	17	68	621	1090	442.3	1	1	41	1607	726.49	3183	0.4615	1872	218
MY1_20171011_oligo_Nuc_rDNA_005	5	10	2	70	664	1040	393.4	2	1	36	906	377.51	1660	0.3571	173	1779
MY1_20171011_oligo_Nuc_rDNA_005	5	10	2	70	664	1040	393.4	2	2	37	876	310.91	1464	0.5714	188	1783
MY1_20171011_oligo_Nuc_rDNA_005	5	10	3	71	589	1050	389	1	1	58	1037	341.23	1881	0.3846	577	112
MY1_20171011_oligo_Nuc_rDNA_005	5	10	4	72	811	1120	501.4	2	1	34	1056	398.29	1818	0.5	889	1536
MY1_20171011_oligo_Nuc_rDNA_005	5	10	4	72	811	1120	501.4	2	2	35	984	291.87	1575	0.75	897	1531
MY1_20171011_oligo_Nuc_rDNA_005	5	10	5	73	735	1010	311.8	2	1	37	1000	476.83	2007	0.2857	952	253
MY1_20171011_oligo_Nuc_rDNA_005	5	10	5	73	735	1010	311.8	2	2	33	968	388.47	1694	0.2143	969	240
MY1_20171011_oligo_Nuc_rDNA_005	5	10	6	74	800	1160	555.1	2	1	39	1021	374.26	1850	0.3333	1193	1830
MY1_20171011_oligo_Nuc_rDNA_005	5	10	6	74	800	1160	555.1	2	2	36	1083	408.82	2008	0.6667	1204	1824
MY1_20171011_oligo_Nuc_rDNA_005	5	10	8	76	707	1150	486	1	1	46	1654	703.82	3233	0.6429	1348	496
MY1_20171011_oligo_Nuc_rDNA_006	6	14	1	79	640	966	306.5	1	1	59	1041	315.19	1659	0.6923	27	1938
MY1_20171011_oligo_Nuc_rDNA_006	6	14	2	80	370	708	117.2	0	NaN	NaN	NaN	NaN	NaN	NaN	NaN	NaN
MY1_20171011_oligo_Nuc_rDNA_006	6	14	3	81	841	1030	366.5	2	1	38	977	354.04	1627	0.3125	255	1285
MY1_20171011_oligo_Nuc_rDNA_006	6	14	3	81	841	1030	366.5	2	2	35	781	259.59	1271	0.6875	270	1290
MY1_20171011_oligo_Nuc_rDNA_006	6	14	5	83	753	1090	465.7	1	1	43	1552	623.49	2805	0.5333	666	1686
MY1_20171011_oligo_Nuc_rDNA_006	6	14	7	85	860	1090	420.4	2	1	34	871	360.44	1590	0.625	828	247
MY1_20171011_oligo_Nuc_rDNA_006	6	14	7	85	860	1090	420.4	2	2	35	794	257.69	1274	0.5	835	236
MY1_20171011_oligo_Nuc_rDNA_006	6	14	10	88	882	1140	583.5	1	1	43	1809	771.36	3239	0.5625	1096	977
MY1_20171011_oligo_Nuc_rDNA_006	6	14	11	89	880	1090	413.9	1	1	53	1443	460.33	2319	0.875	1467	1588
[truncated: 64 more rows]

## Sheet: MY6_Rep1
DatasetName	ImageIndex	TotalCellCount	CellIndex	GlobalCellIndex	NuclearSize	AvgNuclearIntensity	std_NuclearIntensity	Cy5_NumSpotsPerCell	Cy5_SpotIndex	Cy5_SpotSize	Cy5_MeanSpotIntensity	Cy5_std_SpotIntensity	Cy5_MaxSpotIntensity	Cy5_SpotRRD	Cy5_Spot_centroidX	Cy5_Spot_centroidY
[truncated: 908 more rows]

[truncated: 3 more sheets: MY6_Rep2, PX174_Rep1, PX174_Rep2]
